# Supplementary material for: Enantioselective C–H amidation of sulfondiimines for the synthesis of 1,2,4-benzothiadiazine-1-imines under cobalt catalysis
Source: Royal Society of Chemistry journal article supplement (doi:10.1039/d5qo00355e), 2025-01-01
Supplement: d5qo00355e2.pdf [file d5qo00355e2.pdf]

## *Supporting Information*

### **Enantioselective C–H Amidation of Sulfondiimines for the Synthesis of 1,2,4-Benzothiadiazine-1-Imines under Cobalt Catalysis**

Ayami Murata,<sup>1</sup> Tomonori Endo,<sup>2</sup> Yuki Hirata,<sup>1</sup> Kosuke Higashida,<sup>2</sup> Tatsuhiko Yoshino,<sup>2\*</sup> Shigeki Matsunaga.<sup>1,2\*</sup>

<sup>1</sup>Faculty of Pharmaceutical Sciences, Hokkaido University, Kita-ku, Sapporo, Japan.

<sup>2</sup>Department of Chemistry, Graduate School of Science, Kyoto University, Sakyo-ku, Kyoto, Japan.

Email: [yoshino.tatsuhiko.5j@kyoto-u.ac.jp](mailto:yoshino.tatsuhiko.5j@kyoto-u.ac.jp)

[matsunaga.shigeki.5x@kyoto-u.ac.jp](mailto:matsunaga.shigeki.5x@kyoto-u.ac.jp)

### **Table of Contents**

|                                                                                                                            |     |
|----------------------------------------------------------------------------------------------------------------------------|-----|
| 1. General.....                                                                                                            | S2  |
| 2. Experimental procedures .....                                                                                           | S3  |
| 2-1. Preparation of substrates .....                                                                                       | S3  |
| 2-2. Cobalt(III)/chiral carboxylic acid-catalyzed enantioselective C(sp <sup>2</sup> )–H amidation of sulfondiimines ..... | S4  |
| 2-3. Determination of the absolute configuration of 3aa .....                                                              | S25 |
| 3. DFT calculations and non-covalent interaction plots. ....                                                               | S27 |
| 4. Reference.....                                                                                                          | S31 |
| 5. NMR Spectra .....                                                                                                       | S32 |

## 1. General

All non-aqueous reactions were carried out in a flame-dried glassware under argon atmosphere unless otherwise noted or in an argon-filled glovebox. NMR spectra were recorded on JEOL JNM-ECA600 spectrometers operating at 600.17 MHz for  $^1\text{H}$  NMR, 150.92 MHz for  $^{13}\text{C}$  NMR, and 564.69 Hz for  $^{19}\text{F}$  NMR, JEOL JNM-ECA 600 spectrometers operating at 594.17 MHz for  $^1\text{H}$  NMR, 149.41 MHz for  $^{13}\text{C}$  NMR, JEOL JNM-ECZ 600 spectrometers operating at 599.67 MHz for  $^1\text{H}$  NMR. Chemical shifts were reported in the scale relative to TMS (0.00 ppm for  $^1\text{H}$  NMR in  $\text{CDCl}_3$ ),  $\text{CHCl}_3$  (7.26 ppm for  $^1\text{H}$  NMR in  $\text{CDCl}_3$ ),  $\text{CDCl}_3$  (77.00 ppm for  $^{13}\text{C}$  NMR in  $\text{CDCl}_3$ ) and  $\text{PhCF}_3$  (−63.72 ppm for  $^{19}\text{F}$  NMR) as an internal reference, respectively. Column chromatography was performed with Kanto Silica gel 60 N (40-50 mesh) or Yamazen YFLC AI-580 using Universal Column SiOH. High resolution mass spectrometry (HRMS) was performed on a Bruker micrOTOF II-KR spectrometer in Atmospheric Pressure Chemical Ionization (APCI) method using “LC/MS tuning mix, for APCI, low concentration” as the internal standard. Optical rotations were measured on a JASCO P-1030 digital polarimeter at the sodium D line (589 nm). Analytical high performance liquid chromatography (HPLC) was performed on a JASCO PU-1580 intelligent HPLC pump with JASCO MD-4017 PDA detector using Daicel Chiralpak columns (0.46 cm  $\times$  25 cm). Retention times (tR) and peak ratios were determined with JASCO-ChromNAV analysis system.

Materials: Dichloromethane (DCM) and toluene were purified by Glass Contour solvent purification system before use. *t*AmOH was purchased from Aldrich (anhydrous grade) and used as received. Sulfondiimines **1**,<sup>[S1]</sup> dioxazolones **2**,<sup>[S2]</sup> chiral carboxylic acids (**A1–A5**),<sup>[S3]</sup> and  $\text{Cp}^*\text{Co}(\text{CO})\text{I}_2$ <sup>[S4]</sup> were synthesized according to the previously described methods. All other reagents were commercially available and used as received unless otherwise noted.

## 2. Experimental procedures

### 2-1. Preparation of substrates

#### Preparation of sulfondiimine **1d**

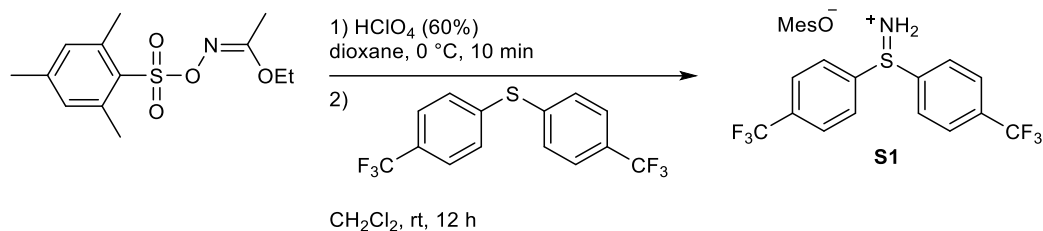

To a solution of ethyl *O*-(mesitylenesulfonyl)acetohydroxamate (1.7 g, 6.0 mmol, 1 equiv.) in 1,4-dioxane (6 mL) was added 60% perchloric acid (3.9 mL) dropwise at 0 °C. After additional vigorous stirring for 10 min at 0 °C, cold water was added and the product was extracted with CH<sub>2</sub>Cl<sub>2</sub>. The combined organic layers were washed with brine, dried over Na<sub>2</sub>SO<sub>4</sub>, filtered, and evaporated under vacuum to approximately 1 mL. This mixture was slowly added to a solution of bis(4-(trifluoromethyl)phenyl)sulfane (1.1 g, 6.0 mmol, 1 equiv.) in CH<sub>2</sub>Cl<sub>2</sub> (6 mL) at 0 °C. The reaction mixture was stirred at room temperature for 12 h. Approximately half of the CH<sub>2</sub>Cl<sub>2</sub> was evaporated, and diethyl ether (12 mL) was added. The product crystallized upon storage at –30 °C overnight and was collected by filtration and dried in high vacuum to give the corresponding sulfiliminium salt **S1** (1.7 g, 3.6 mmol, 60%). **<sup>1</sup>H NMR** (CDCl<sub>3</sub>, 600.17 MHz) δ 8.13 (s, 2H), 7.97 (d, *J* = 8.2 Hz, 4H), 7.62 (d, *J* = 8.2 Hz, 4H), 6.79 (s, 2H), 2.45 (s, 6H), 2.24 (s, 3H). **<sup>13</sup>C{<sup>1</sup>H} NMR** (CDCl<sub>3</sub>, 150.92 MHz) δ 139.3, 139.1, 136.9, 136.7, 135.2 (q, <sup>2</sup>*J*<sub>C-F</sub> = 33.7 Hz), 130.8, 129.2, 127.4 (q, <sup>3</sup>*J*<sub>C-F</sub> = 3.4 Hz), 122.7 (q, <sup>1</sup>*J*<sub>C-F</sub> = 275.0 Hz), 22.8, 20.6. **<sup>19</sup>F NMR** (CDCl<sub>3</sub>, 564.67 MHz) δ -63.6. **HRMS** (ESI) *m/z*: [M-MesSO<sup>-</sup>]<sup>+</sup> Calcd for C<sub>14</sub>H<sub>10</sub>F<sub>6</sub>NS<sup>+</sup>: 388.0433; Found 388.0433.

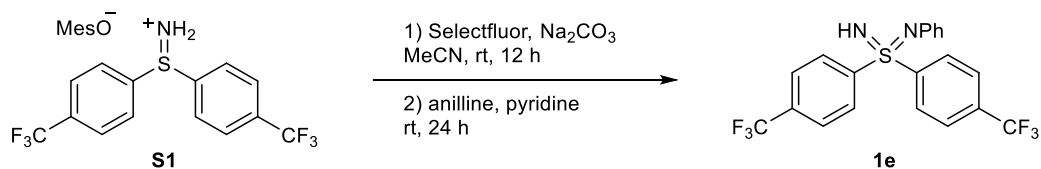

To a solution of the obtained sulfiliminium salt **S1** (1.6 g, 3.0 mmol, 1.0 equiv.) and Na<sub>2</sub>CO<sub>3</sub> (5.0 equiv.) in MeCN (12 mL) was added Selectfluor® (1.0 equiv.) at 0 °C and the mixture was stirred for 12 h at room temperature. The mixture was quenched by water and extracted with CH<sub>2</sub>Cl<sub>2</sub>. The combined organic layers were washed with brine, dried over Na<sub>2</sub>SO<sub>4</sub>, filtered, and evaporated under vacuum. To the residue was added to a solution of PhNH<sub>2</sub> (0.81 mL, 9.0 mmol, 3.0 equiv.) and pyridine (0.29 mL, 3.6 mmol, 1.2 equiv.) and the mixture was stirred for 24 h at room temperature. The residue was purified by silica gel column chromatography (hexane/AcOEt) and evaporated under vacuum. The residual solid was washed by hexane and filtered to give sulfondiimine **1e** (0.19 g, 0.44 mmol, 15%). **<sup>1</sup>H NMR** (CDCl<sub>3</sub>, 600.17 MHz) δ 8.32 (d, *J* = 8.2 Hz, 4H), 7.74 (d, *J* = 8.2 Hz, 4H), 7.20-7.11 (m, 4H), 6.94-6.89 (m, 1H). **<sup>13</sup>C{<sup>1</sup>H} NMR** (CDCl<sub>3</sub>, 150.92 MHz) δ 146.2, 144.5, 134.1 (q, <sup>2</sup>*J*<sub>C-F</sub> = 33.2 Hz), 129.1, 128.7, 126.4 (q, <sup>3</sup>*J*<sub>C-F</sub> = 3.4 Hz), 123.3, 123.2 (q, <sup>1</sup>*J*<sub>C-F</sub> = 273.1 Hz), 121.7. **<sup>19</sup>F NMR** (CDCl<sub>3</sub>, 564.67 MHz) δ -63.2. **HRMS** (ESI) *m/z*: [M+H]<sup>+</sup> Calcd for C<sub>20</sub>H<sub>15</sub>F<sub>6</sub>N<sub>2</sub>S<sup>+</sup>: 429.0855; Found 429.0857. **Rf** 0.1 (hexane/DCM = 1:3).

All other sulfondiimines were reported in our previous work.<sup>[S1]</sup>

## 2-2. Cobalt(III)/chiral carboxylic acid-catalyzed enantioselective C(sp<sup>2</sup>)-H amidation of sulfondiimines

### General Procedure

In an argon-filled glovebox, a screw-cap test tube was charged with Cp\*Co(CO)I<sub>2</sub> (9.5 mg, 0.020 mmol, 10 mol %), AgOTf (10.3 mg, 0.040 mmol, 20 mol %), chiral acid **A5** (8.8 mg, 0.020 mmol, 10 mol %), sulfondiimine **1** (0.24 mmol, 1.2 equiv.), dioxazolone **2** (0.20 mmol, 1.0 equiv.), and *t*AmOH (400 μL). The test tube was capped, and then brought out of the glovebox. The reaction mixture was stirred for 24 h at 80 °C. The reaction mixture was filtered through a short pad of silica gel, eluted with AcOEt, and evaporated under reduced pressure. The crude product was purified by silica gel column chromatography (DCM/hexane) to afford **3**.

**(S)-3-(4-fluorophenyl)-N,1-diphenyl-116-benzo[e][1,2,4]thiadiazin-1-imine (3aa)**

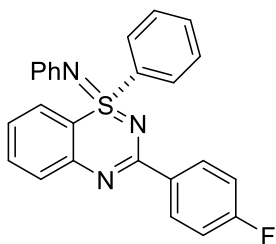

**General Procedure 3aa** using compound **1a** (70.2 mg, 0.24 mmol) and **2a** (36.2 mg, 0.2 mmol) and purification by silica gel column chromatography (DCM/hexane = 2/1) afforded **3aa** as a colorless solid (62.6 mg, 76%). **<sup>1</sup>H NMR** (CDCl<sub>3</sub>, 600.17 MHz)  $\delta$  8.46-8.41 (m, 2H), 8.17-8.13 (m, 2H), 7.65-7.57 (m, 3H), 7.56-7.50 (m, 2H), 7.47 (d,  $J$  = 7.9 Hz, 1H), 7.19-7.15 (m, 1H), 7.15-7.10 (m, 2H), 7.09-7.05 (m, 2H), 6.90-6.83 (m, 3H).

**<sup>13</sup>C{<sup>1</sup>H} NMR** (CDCl<sub>3</sub>, 150.92 MHz)  $\delta$  164.8 (d,  $^1J_{C-F}$  = 250.0 Hz), 159.0, 149.9, 143.2, 141.6, 134.2, 134.1 (d,  $^4J_{C-F}$  = 2.9 Hz), 133.2, 130.6 (d,  $^3J_{C-F}$  = 8.7 Hz), 129.2, 129.1, 128.5, 128.2, 126.1, 125.3, 123.6, 122.6, 115.1 (d,  $^2J_{C-F}$  = 21.7 Hz), 110.9. **<sup>19</sup>F NMR** (CDCl<sub>3</sub>, 564.67 MHz)  $\delta$  -111.1. **HPLC** (chiral column: DAICEL CHIRALPAK IF; solvent: hexane/2-propanol = 49/1; flow rate: 1.0 mL/min; detection: at 254 nm):  $t_R$  = 8.9 (major) and 10.8 (minor) min. **HRMS** (ESI)  $m/z$ : [M+H]<sup>+</sup> Calcd for C<sub>25</sub>H<sub>19</sub>FN<sub>3</sub>S<sup>+</sup>: 412.1278; Found 412.1284.  **$[\alpha]_D^{23.7}$**  = +138.9 ( $c$  = 0.50, CHCl<sub>3</sub>). **R<sub>f</sub>** 0.43 (hexane/DCM = 1/3).

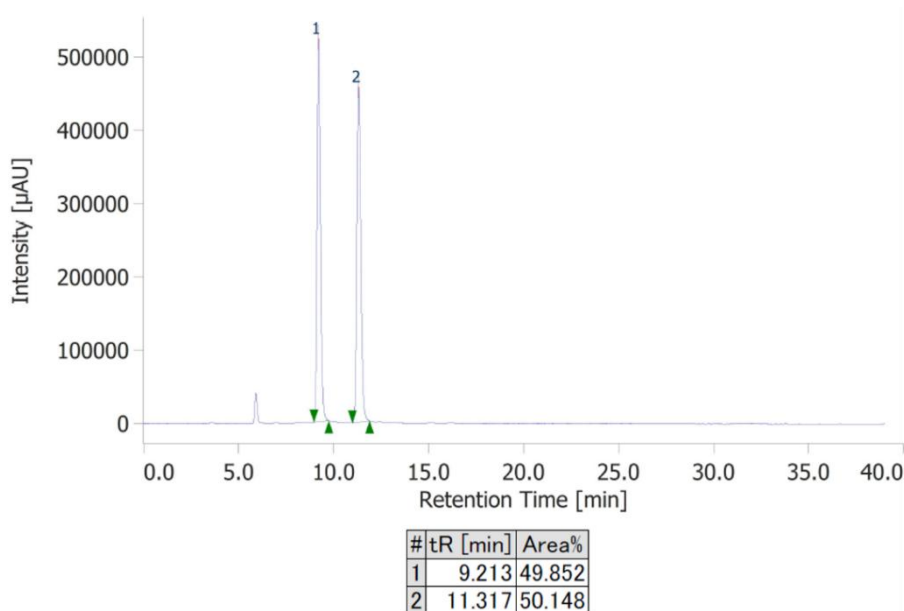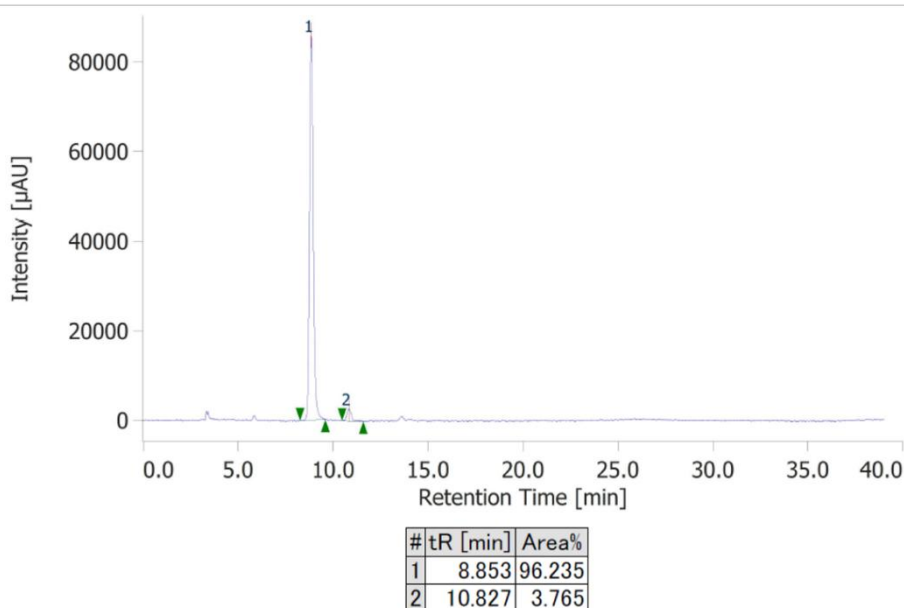

**(S)-N,1,3-triphenyl-1*l***6-benzo[e][1,2,4]thiadiazin-1-imine (**3ab**)

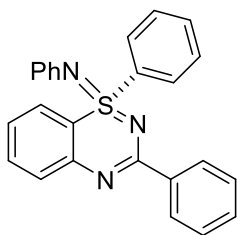

**General Procedure** using compound **1a** (70.2 mg, 0.24 mmol) and **2b** (32.6 mg, 0.2 mmol) and purification by silica gel column chromatography (DCM/hexane = 2/1) afforded **3ab** as a colorless solid (55.6 mg, 71%). **<sup>1</sup>H NMR** (CDCl<sub>3</sub>, 600.17 MHz) δ 8.46-8.41 (m, 2H), 8.19-8.14 (m, 2H), 7.66-7.51 (m, 5H), 7.51-7.42 (m, 4H), 7.21-7.14 (m, 1H), 7.11-7.03 (m, 2H), 6.91-6.84 (m, 3H). **<sup>13</sup>C{<sup>1</sup>H} NMR** (CDCl<sub>3</sub>, 150.92 MHz) δ 160.0, 150.0, 143.3, 141.7, 138.1, 134.2, 133.2, 130.8, 129.2, 129.1, 128.5, 128.3, 128.2, 128.2, 126.1, 125.3, 123.6,

122.6, 111.0. **HPLC** (chiral column: DAICEL CHIRALPAK IF; solvent: hexane/2-propanol = 49/1; flow rate: 1.0 mL/min; detection: at 254 nm): t<sub>R</sub> = 10.1 (major) and 12.6 (minor) min. **HRMS** (ESI) m/z: [M+H]<sup>+</sup> Calcd for C<sub>25</sub>H<sub>20</sub>N<sub>3</sub>S<sup>+</sup>: 394.1372; Found 394.1373. [α]<sub>D</sub><sup>23.3</sup> = +130.1 (c = 0.50, CHCl<sub>3</sub>). **R<sub>f</sub>** 0.39 (hexane/AcOEt = 5/1).

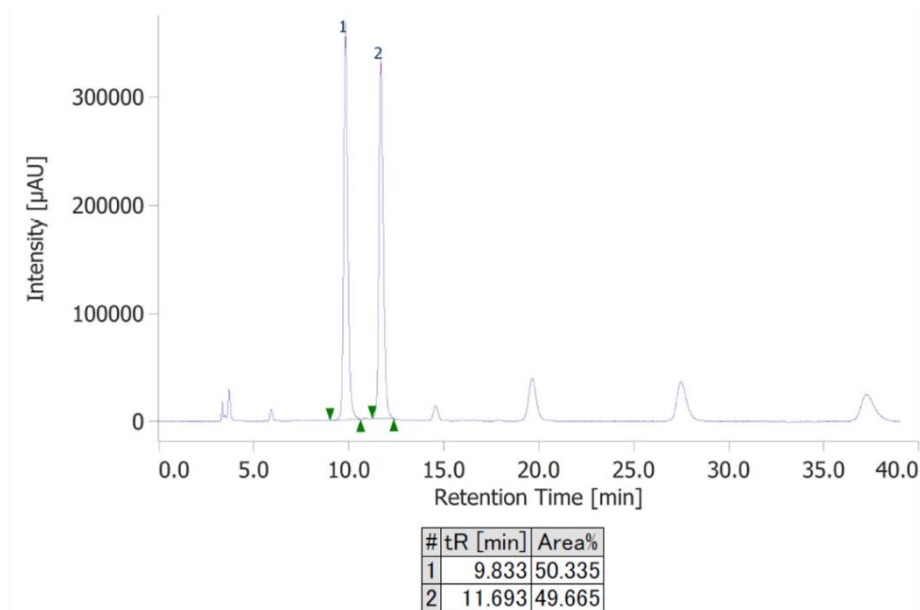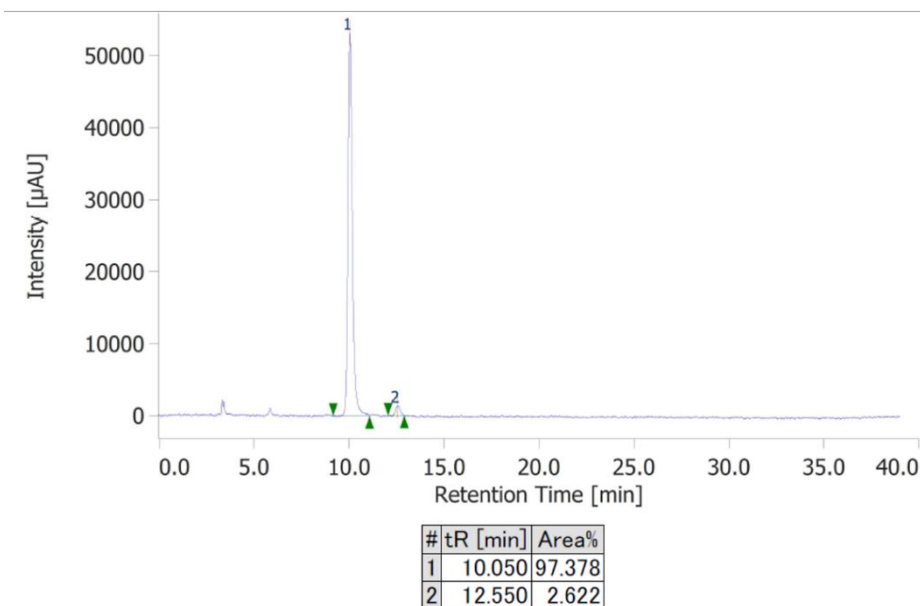

**(S)-N,1-diphenyl-3-(p-tolyl)-116-benzo[e][1,2,4]thiadiazin-1-imine (3ac)**

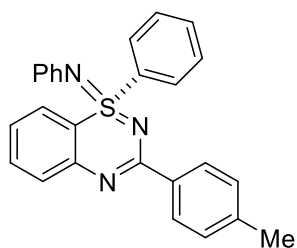

**General Procedure** using compound **1a** (70.2 mg, 0.24 mmol) and **2c** (35.4 mg, 0.2 mmol) and purification by silica gel column chromatography (DCM/hexane = 3/2) afforded **3ac** as a colorless solid (54.9 mg, 67%). **<sup>1</sup>H NMR** (CDCl<sub>3</sub>, 600.17 MHz) δ 8.33 (d, *J* = 8.1 Hz, 2H), 8.19-8.12 (m, 2H), 7.65-7.55 (m, 3H), 7.55-7.49 (m, 2H), 7.47 (d, *J* = 7.9 Hz, 1H), 7.29-7.25 (m, 2H), 7.17-7.12 (m, 1H), 7.10-7.03 (m, 3H), 6.90-6.83 (m, 3H), 2.42 (s, 3H). **<sup>13</sup>C{<sup>1</sup>H} NMR** (CDCl<sub>3</sub>, 150.92 MHz) δ 159.9, 150.1, 143.3, 141.7, 141.1, 135.2, 134.1, 133.1, 129.1, 129.0, 128.9, 128.4, 128.3, 128.1, 125.8, 125.2, 123.6, 122.4, 110.8, 21.5. **HPLC** (chiral column: DAICEL CHIRALPAK IF; solvent: hexane/2-propanol = 49/1; flow rate: 1.0 mL/min; detection: at 254 nm): *t*<sub>R</sub> = 11.5 (major) and 13.6 (minor) min. **HRMS** (ESI) *m/z*: [M+H]<sup>+</sup> Calcd for C<sub>26</sub>H<sub>22</sub>N<sub>3</sub>S<sup>+</sup>: 408.1529; Found 408.1525. [ $\alpha$ ]<sub>D</sub><sup>23.6</sup> = +112.0 (*c* = 0.50, CHCl<sub>3</sub>). **R<sub>f</sub>** 0.51 (DCM/hexane = 3/1).

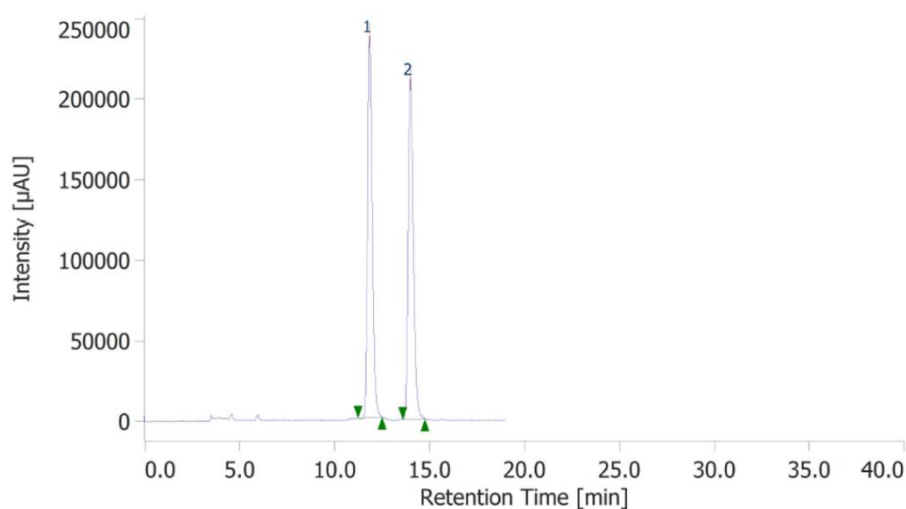

| # | tR [min] | Area%  |
|---|----------|--------|
| 1 | 11.840   | 49.868 |
| 2 | 13.983   | 50.132 |

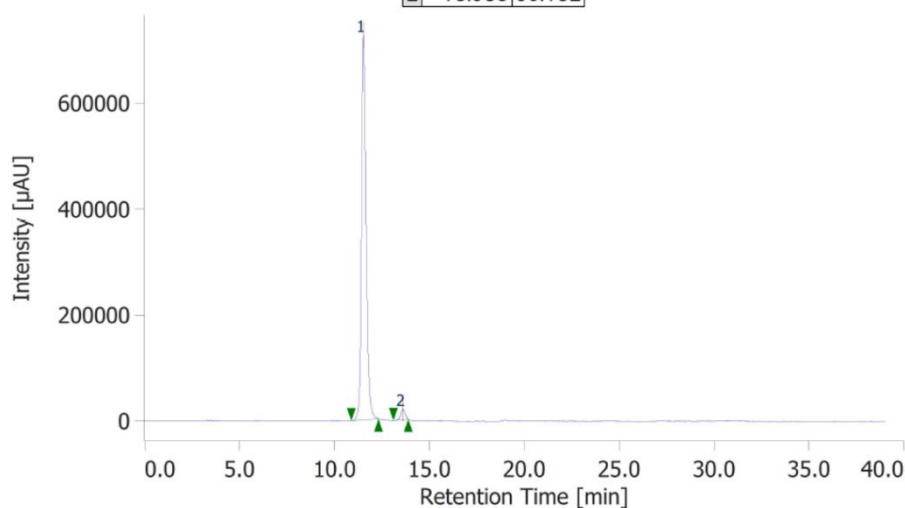

| # | tR [min] | Area%  |
|---|----------|--------|
| 1 | 11.527   | 97.432 |
| 2 | 13.607   | 2.568  |

**(S)-3-(4-methoxyphenyl)-N,1-diphenyl-116-benzo[e][1,2,4]thiadiazin-1-imine (3ad)**

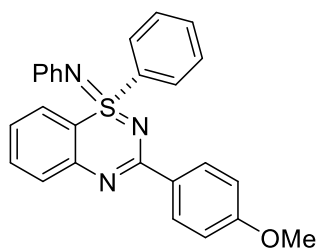

**General Procedure** using compound **1a** (70.2 mg, 0.24 mmol) and **2d** (38.6 mg, 0.2 mmol) and purification by silica gel column chromatography (DCM/hexane = 3/1) afforded **3ad** as a colorless solid (45.2 mg, 53%). <sup>1</sup>H NMR (CDCl<sub>3</sub>, 600.17 MHz) δ 8.42-8.38 (m, 2H), 8.18-8.13 (m, 2H), 7.63-7.56 (m, 3H), 7.54-7.48 (m, 2H), 7.48-7.45 (m, 1H), 7.15-7.11 (m, 1H), 7.10-7.04 (m, 2H), 6.99-6.94 (m, 2H), 6.89-6.85 (m, 3H), 3.87 (s, 3H). <sup>13</sup>C{<sup>1</sup>H} NMR (CDCl<sub>3</sub>, 150.92 MHz) δ 161.9, 159.6, 150.2,

143.4, 141.7, 134.1, 133.0, 130.5, 130.2, 129.1, 129.0, 128.3, 128.0, 125.6, 125.2, 123.5, 122.4, 113.4, 110.7, 55.3 **HPLC** (chiral column: DAICEL CHIRALPAK IF; solvent: hexane/2-propanol = 49/1; flow rate: 1.0 mL/min; detection: at 254 nm): t<sub>R</sub> = 17.4 (major) and 22.6 (minor) min. **HRMS** (ESI) m/z: [M+H]<sup>+</sup> Calcd for C<sub>26</sub>H<sub>22</sub>N<sub>3</sub>OS<sup>+</sup>: 424.1478; Found 424.1486. [α]<sub>D</sub><sup>23.4</sup> = +73.0 (c = 0.50, CHCl<sub>3</sub>). **Rf** 0.1 (hexane/DCM = 1/3).

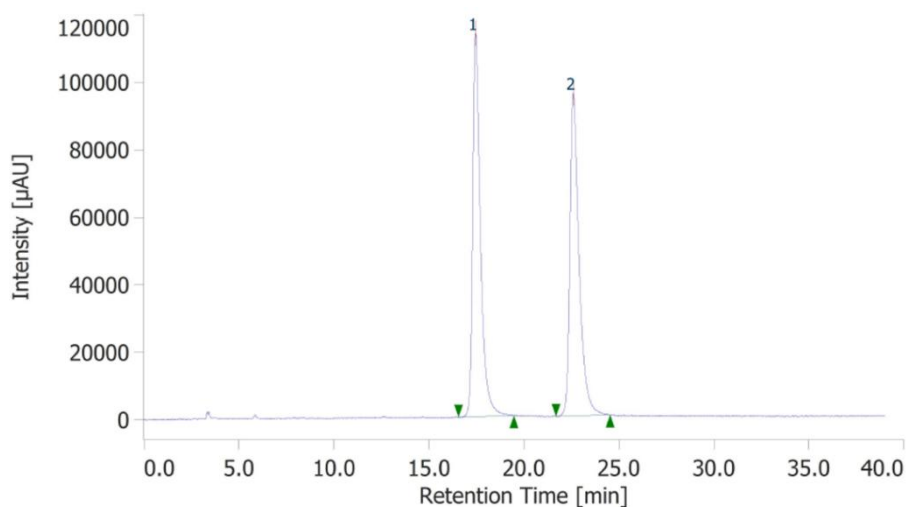

| # | tR [min] | Area%  |
|---|----------|--------|
| 1 | 17.450   | 50.109 |
| 2 | 22.587   | 49.891 |

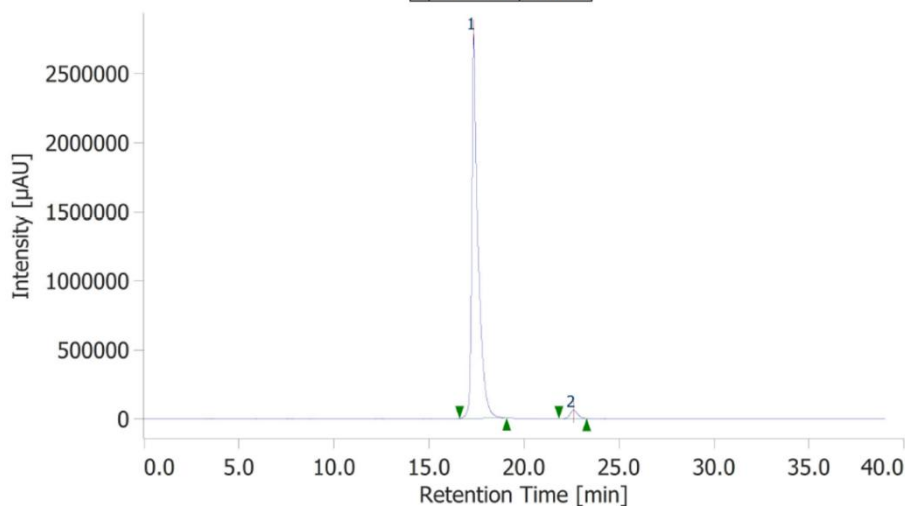

| # | tR [min] | Area%  |
|---|----------|--------|
| 1 | 17.357   | 97.315 |
| 2 | 22.597   | 2.685  |



**(S)-N,1-diphenyl-3-(4-(trifluoromethyl)phenyl)-1λ6-benzo[e][1,2,4]thiadiazin-1-imine (3ae)**

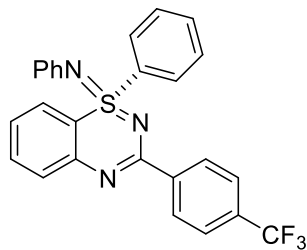

**General Procedure** using compound **1a** (70.2 mg, 0.24 mmol) and **2e** (46.2 mg, 0.2 mmol) and purification by silica gel column chromatography (hexane/Et<sub>2</sub>O = 2/1) afforded **3ae** as a colorless solid (90.1 mg, 97%). <sup>1</sup>H NMR (CDCl<sub>3</sub>, 600.17 MHz) δ 8.54 (d, *J* = 8.2 Hz, 2H), 8.17-8.13 (m, 2H), 7.70 (d, *J* = 8.4 Hz, 2H), 7.66-7.60 (m, 3H), 7.58-7.54 (m, 2H), 7.50 (d, *J* = 7.7 Hz 1H), 7.24-7.19 (m, 1H), 7.10-7.05 (m, 2H), 6.89 (t, *J* = 7.4 Hz, 1H), 6.84 (d, *J* = 7.6 Hz, 2H). <sup>13</sup>C{<sup>1</sup>H} NMR (CDCl<sub>3</sub>, 150.92 MHz) δ 158.4, 149.6, 143.0, 141.4, 141.3, 134.3, 133.3, 132.4 (q, <sup>2</sup>*J*<sub>C-F</sub> = 32.8 Hz), 129.2, 129.1, 128.7, 128.4, 128.4, 126.8, 126.6, 125.2 (q, <sup>3</sup>*J*<sub>C-F</sub> = 3.9 Hz), 124.3 (q, <sup>1</sup>*J*<sub>C-F</sub> = 272.0 Hz), 123.6, 122.8, 111.3. <sup>19</sup>F NMR (CDCl<sub>3</sub>, 564.67MHz) δ -63.27. **HPLC** (chiral column: DAICEL CHIRALPAK IA; solvent: hexane/2-propanol = 95/5; flow rate: 1.0 mL/min; detection: at 254 nm): *t*<sub>R</sub> = 7.1 (major) and 8.4 (minor) min. **HRMS** (ESI) *m/z*: [M+H]<sup>+</sup> Calcd for C<sub>26</sub>H<sub>19</sub>N<sub>3</sub>SF<sub>3</sub><sup>+</sup>: 462.1246; Found 462.1246. [*α*]<sub>D</sub><sup>23.0</sup> = +102.9 (*c* = 0.50, CHCl<sub>3</sub>). **R<sub>f</sub>** 0.45 (hexane/AcOEt = 5/1).

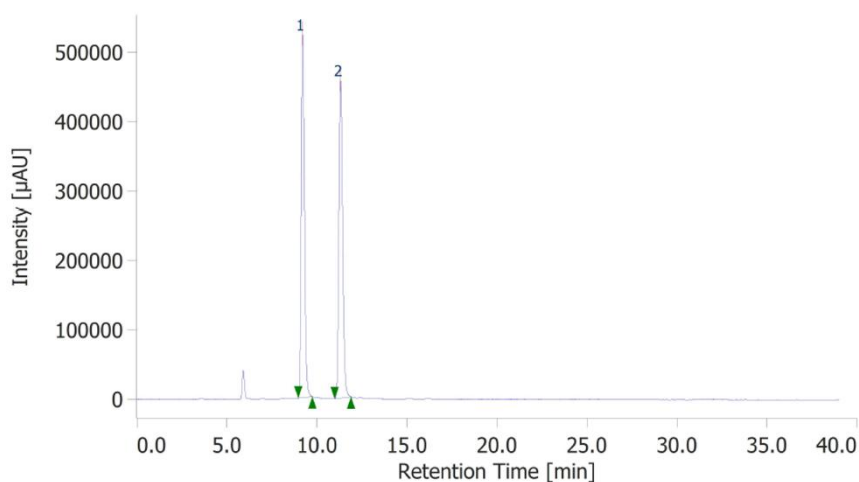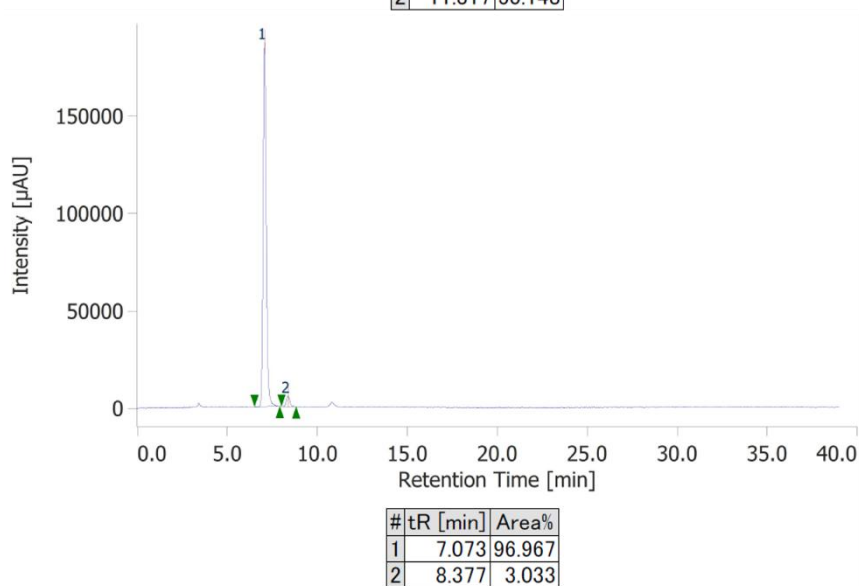

**Methyl (S)-4-(1-phenyl-1-(phenylimino)-116-benzo[e][1,2,4]thiadiazin-3-yl)benzoate (3af)**

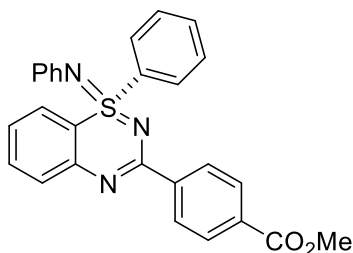

**General Procedure** using compound **1a** (70.2 mg, 0.24 mmol) and **2f** (44.2 mg, 0.2 mmol) and purification by silica gel column chromatography (hexane/DCM/AcOEt = 8/1/1) afforded **3af** as a colorless solid (54.8 mg, 61%).

**<sup>1</sup>H NMR** (CDCl<sub>3</sub>, 399.78 MHz) δ 8.44-8.40 (m, 2H), 8.10-8.06 (m, 2H), 8.06-8.01 (m, 2H), 7.59-7.43 (m, 5H), 7.43-7.38 (m, 1H), 7.12 (ddd, *J* = 8.2, 6.5, 1.8 Hz, 1H), 7.02-6.96 (m, 2H), 6.83-6.74 (m, 3H), 3.86 (s, 3H). **<sup>13</sup>C{<sup>1</sup>H} NMR**

(CDCl<sub>3</sub>, 100.53 MHz) δ 166.9, 158.8, 149.6, 143.0, 141.6, 142.2, 141.3, 134.2, 133.3, 131.8, 129.4, 129.2, 129.1, 128.4, 128.3, 126.6, 125.3, 123.6, 122.7, 111.1, 52.2. **HPLC** (chiral column: DAICEL CHIRALPAK IF; solvent: hexane/2-propanol = 9/1; flow rate: 1.0 mL/min; detection: at 254 nm): *t<sub>R</sub>* = 11.7 (major) and 16.9 (minor) min.

**HRMS** (APCI) *m/z*: [M+H]<sup>+</sup> Calcd for C<sub>27</sub>H<sub>22</sub>N<sub>3</sub>O<sub>2</sub>S<sup>+</sup>: 452.1427; Found 452.1432. [α]<sub>D</sub><sup>23.7</sup> = +71.8 (*c* = 1.0, CHCl<sub>3</sub>). **R<sub>f</sub>** 0.28 (hexane/AcOEt = 3/1).

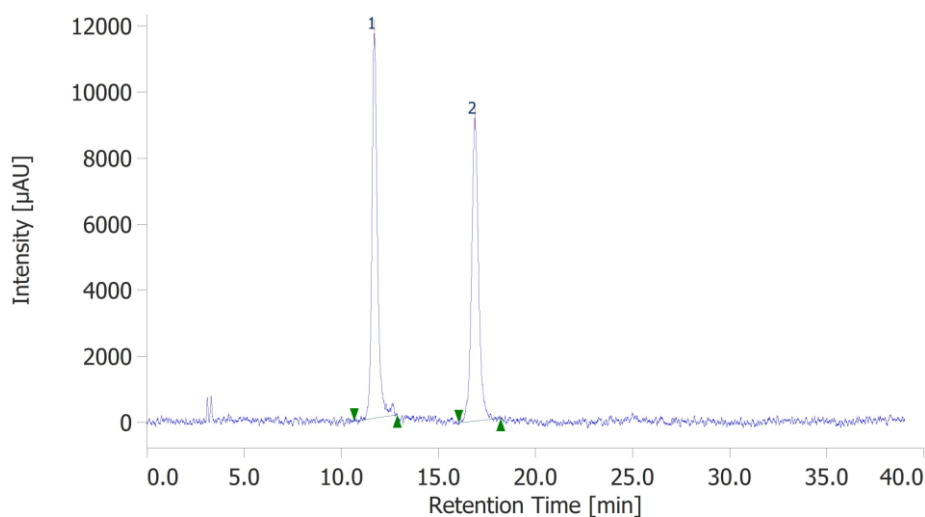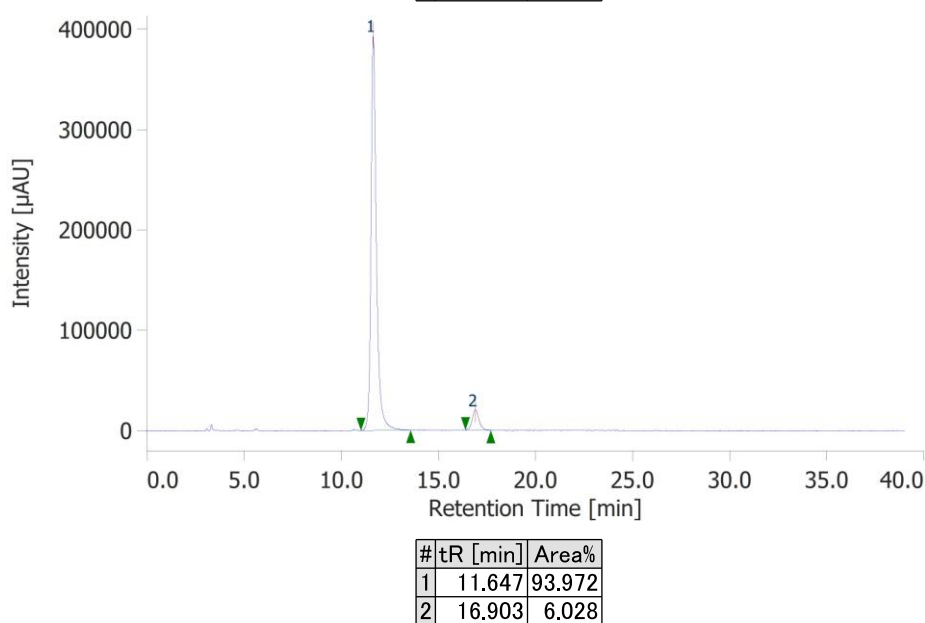

**(S)-N,1-diphenyl-3-(m-tolyl)-1H-benzo[e][1,2,4]thiadiazin-1-imine (3ag)**

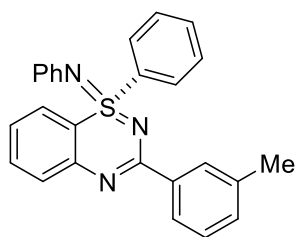

**General Procedure** using compound **1a** (70.2 mg, 0.24 mmol) and **2g** (35.4 mg, 0.2 mmol) and purification by silica gel column chromatography (DCM/hexane = 3/2) afforded **3ag** as a colorless solid (52.8 mg, 65%). **<sup>1</sup>H NMR** (CDCl<sub>3</sub>, 600.17 MHz) δ 8.27-8.21 (m, 2H), 8.18-8.13 (m, 2H), 7.64-7.54 (m, 4H), 7.54-7.50 (m, 1H), 7.47 (dd, *J* = 8.1, 1.2 Hz, 1H), 7.35 (t, *J* = 7.6 Hz, 1H), 7.30 (d, *J* = 7.2 Hz, 1H), 7.18-7.13 (m, 1H), 7.10-7.03 (m, 2H), 6.91-6.82 (m, 3H), 2.43 (s, 3H). **<sup>13</sup>C{<sup>1</sup>H} NMR** (CDCl<sub>3</sub>, 150.92 MHz) δ 160.1, 150.0, 143.3, 141.6, 137.9, 137.7, 134.1, 133.1, 131.6, 129.1, 129.0, 128.9, 128.4, 128.2, 128.1, 126.0, 125.6, 125.2, 123.5, 122.4, 110.8, 21.4 **HPLC** (chiral column: DAICEL CHIRALPAK IF; solvent: hexane/2-propanol = 49/1; flow rate: 1.0 mL/min; detection: at 254 nm): *t<sub>R</sub>* = 9.3 (major) and 11.5 (minor) min. **HRMS** (ESI) *m/z*: [M+H]<sup>+</sup> Calcd for C<sub>26</sub>H<sub>22</sub>N<sub>3</sub>S<sup>+</sup>: 408.1529; Found 408.1530. [α]<sub>D</sub><sup>23.3</sup> = +176.6 (*c* = 0.17, CHCl<sub>3</sub>). **R<sub>f</sub>** 0.45 (DCM/hexane = 3/1).

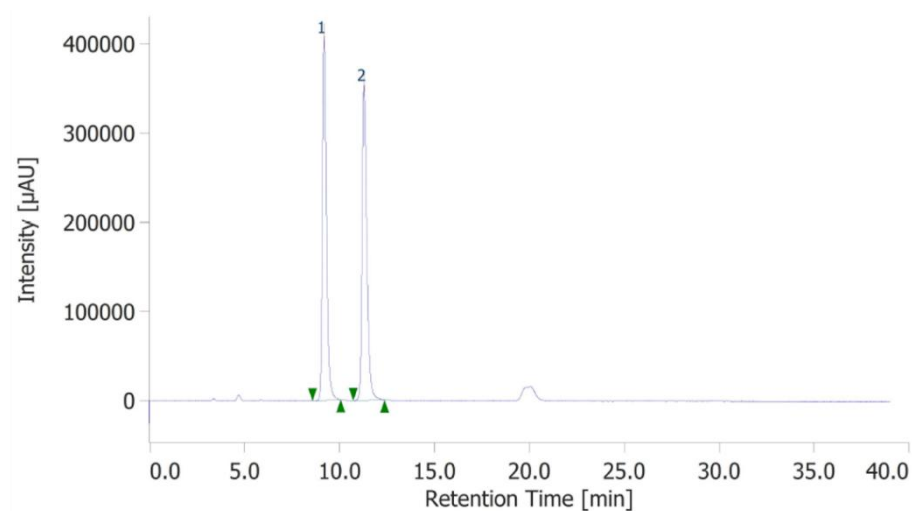

| # | tR [min] | Area%  |
|---|----------|--------|
| 1 | 9.190    | 49.902 |
| 2 | 11.290   | 50.098 |

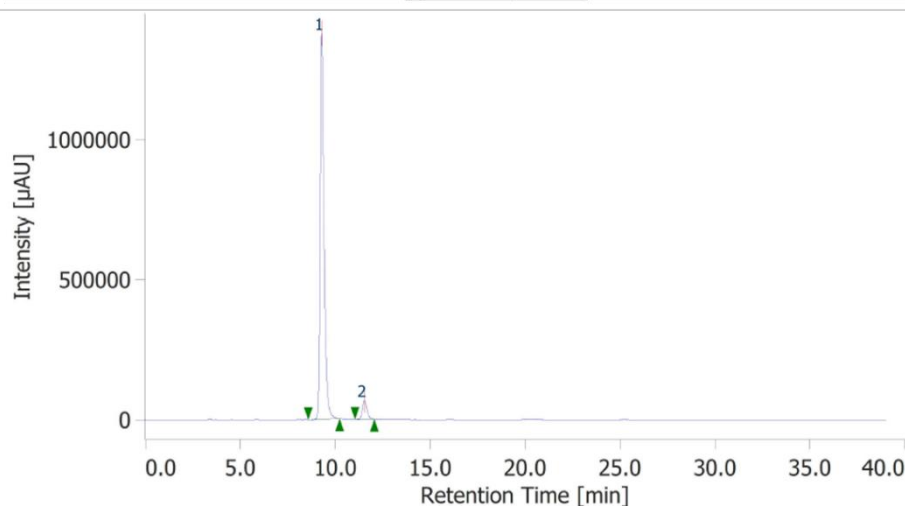

| # | tR [min] | Area%  |
|---|----------|--------|
| 1 | 9.283    | 94.639 |
| 2 | 11.540   | 5.361  |

**(S)-3-(naphthalen-2-yl)-N,1-diphenyl-116-benzo[e][1,2,4]thiadiazin-1-imine (3ah)**

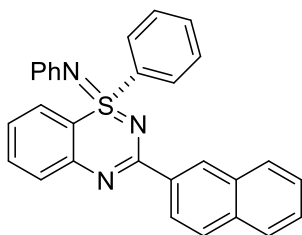

**General Procedure** using compound **1a** (70.2 mg, 0.24 mmol) and **2h** (42.6 mg, 0.2 mmol) and purification by silica gel column chromatography (DCM/hexane = 3/2) afforded **3ah** as a colorless solid (71.9 mg, 81%). <sup>1</sup>H NMR (CDCl<sub>3</sub>, 594.17 MHz) δ 8.96 (s, 1H), 8.57 (dd, *J* = 8.5, 1.7 Hz, 1H), 8.23-8.18 (m, 2H), 7.97 (d, *J* = 8.2 Hz, 1H), 7.92 (d, *J* = 8.2 Hz, 1H), 7.88 (d, *J* = 8.2 Hz, 1H), 7.64-7.60 (m, 4H), 7.57-7.47 (m, 4H), 7.20-7.17 (m, 1H), 7.08-7.05 (m, 2H), 6.91-6.85 (m, 3H). <sup>13</sup>C{<sup>1</sup>H} NMR (CDCl<sub>3</sub>, 149.41 MHz) δ 159.8, 150.0, 143.3, 141.6, 135.3, 134.8, 134.2, 133.2, 133.0, 129.2, 129.2, 129.1, 129.0, 128.5, 128.3, 127.7, 127.6, 127.1, 126.2, 126.1, 125.3, 123.6, 122.6, 111.1; one aromatic signal was missing probably due to overlapping. **HPLC** (chiral column: DAICEL CHIRALPAK IF; solvent: hexane/2-propanol = 49/1; flow rate: 1.0 mL/min; detection: at 254 nm): *t<sub>R</sub>* = 12.7 (major) and 18.9 (minor) min. **HRMS** (ESI) *m/z*: [M+H]<sup>+</sup> Calcd for C<sub>29</sub>H<sub>22</sub>N<sub>3</sub>S<sup>+</sup>: 444.1529; Found 444.1537. [α]<sub>D</sub><sup>23.3</sup> = +51.4 (*c* = 0.16, CHCl<sub>3</sub>). **R<sub>f</sub>** 0.45 (DCM/hexane = 3/1).

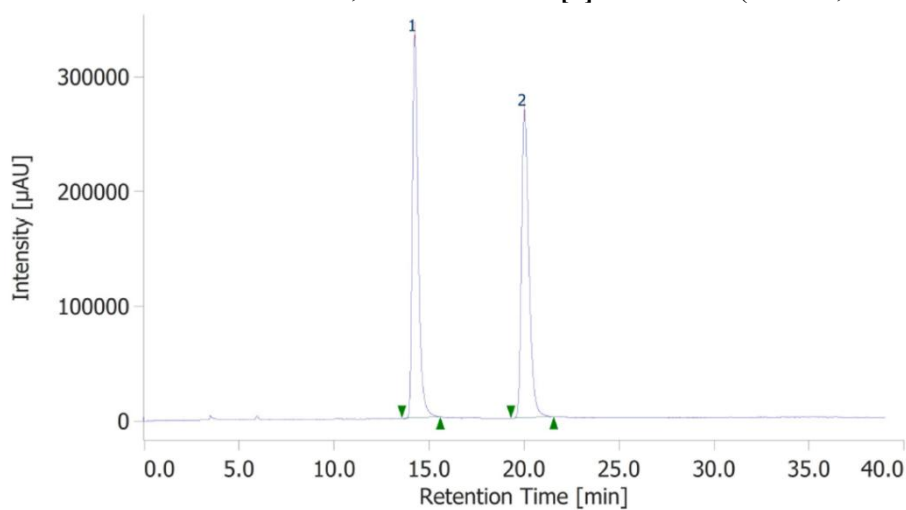

| # | tR [min] | Area%  |
|---|----------|--------|
| 1 | 14.243   | 49.876 |
| 2 | 20.017   | 50.124 |

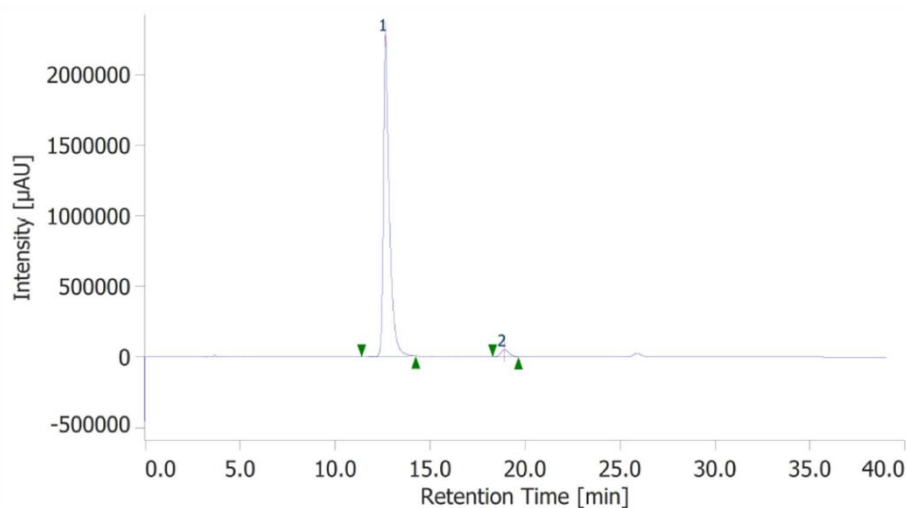

| # | tR [min] | Area%  |
|---|----------|--------|
| 1 | 12.650   | 96.951 |
| 2 | 18.907   | 3.049  |

**(S)-3-(furan-2-yl)-N,1-diphenyl-116-benzo[e][1,2,4]thiadiazin-1-imine (3ai)**

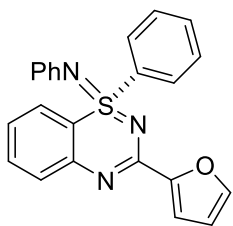

**General Procedure** using compound **1a** (70.2 mg, 0.24 mmol) and **2i** (30.6 mg, 0.2 mmol) and purification by silica gel column chromatography (hexane/AcOEt = 6/1) afforded **3ai** as a colorless solid (39.2 mg, 51%). **<sup>1</sup>H NMR** (CDCl<sub>3</sub>, 600.17 MHz) δ 8.20-8.12 (m, 2H), 7.65-7.56 (m, 5H), 7.54-7.48 (m, 1H), 7.47-7.42 (m, 1H), 7.26 (d, *J* = 3.4 Hz, 1H), 7.17-7.14 (m, 1H), 7.11-7.06 (m, 2H), 6.92-6.84 (m, 3H), 6.54 (dd, *J* = 3.4, 1.7 Hz, 1H). **<sup>13</sup>C{<sup>1</sup>H} NMR** (CDCl<sub>3</sub>, 150.92 MHz) δ 152.5, 151.6, 149.7, 145.1, 143.0, 141.4, 134.3, 133.2, 129.2, 129.0, 128.5, 128.1, 126.1, 125.3, 123.5, 122.6, 114.4, 111.9, 111.5. **HPLC** (chiral column: DAICEL CHIRALPAK IA; solvent: hexane/2-propanol = 95/5; flow rate: 1.0 mL/min; detection: at 254 nm): *t<sub>R</sub>* = 20.3 (major) and 22.2 (minor) min. **HRMS** (ESI) *m/z*: [M+H]<sup>+</sup> Calcd for C<sub>23</sub>H<sub>18</sub>N<sub>3</sub>OS<sup>+</sup>: 384.1165; Found 384.1163. [*α*]<sub>D</sub><sup>23.1</sup> = +132.2 (*c* = 0.22, CHCl<sub>3</sub>). **R<sub>f</sub>** 0.14 (DCM/hexane = 3/1).

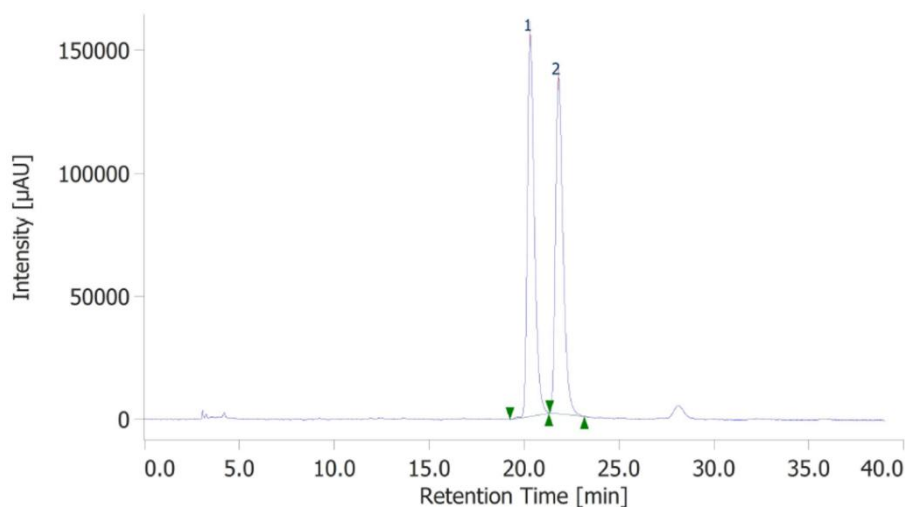

| # | tR [min] | Area%  |
|---|----------|--------|
| 1 | 20.323   | 51.407 |
| 2 | 21.813   | 48.593 |

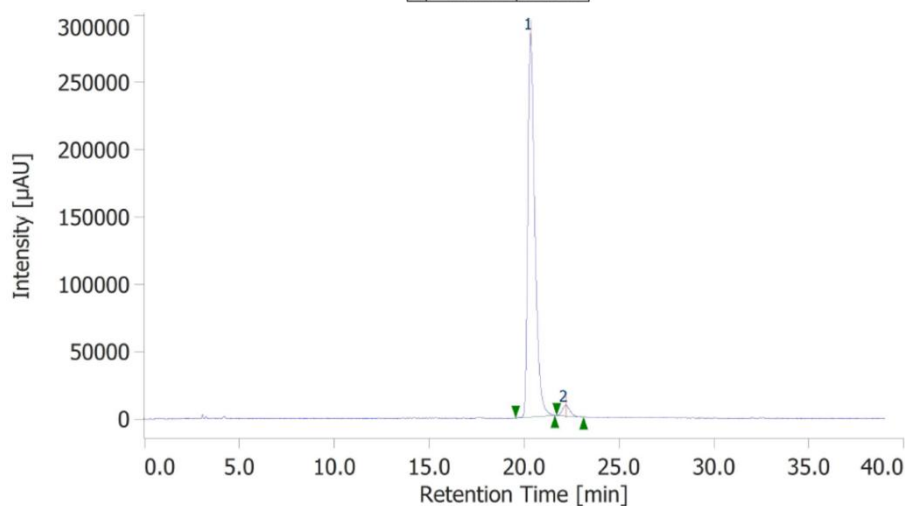

| # | tR [min] | Area%  |
|---|----------|--------|
| 1 | 20.333   | 97.125 |
| 2 | 22.197   | 2.875  |

**(S)-N,1-diphenyl-3-(thiophen-2-yl)-116-benzo[e][1,2,4]thiadiazin-1-imine (3aj)**

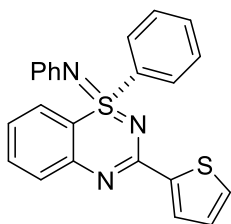

**General Procedure** using compound **1a** (70.2 mg, 0.24 mmol) and **2j** (33.8 mg, 0.2 mmol) and purification by silica gel column chromatography (DCM/hexane = 3/2) afforded **3aj** as a colorless solid (47.5 mg, 60%). **<sup>1</sup>H NMR** (CDCl<sub>3</sub>, 600.17 MHz) δ 8.19-8.14 (m, 2H), 7.98-7.91 (m, 1H), 7.63-7.58 (m, 3H), 7.52-7.42 (m, 4H), 7.15-7.07 (m, 4H), 6.93-6.87 (m, 3H). **<sup>13</sup>C{<sup>1</sup>H} NMR** (CDCl<sub>3</sub>, 150.92 MHz) δ 156.2, 149.9, 143.9, 143.1, 141.5, 134.2, 133.2, 130.0, 129.5, 129.2, 129.0, 128.4, 127.8, 127.8, 125.8, 125.3, 123.7, 122.7, 111.2 **HPLC**

(chiral column: DAICEL CHIRALPAK IA; solvent: hexane/2-propanol = 95/5; flow rate: 1.0 mL/min; detection: at 254 nm): t<sub>R</sub> = 13.6 (major) and 17.5 (minor) min. **HRMS** (ESI) m/z: [M+H]<sup>+</sup> Calcd for C<sub>23</sub>H<sub>18</sub>N<sub>3</sub>S<sub>2</sub><sup>+</sup>: 400.0937; Found 400.0926. [α]<sub>D</sub><sup>23.2</sup> = +106.8 (c = 0.50, CHCl<sub>3</sub>). **R<sub>f</sub>** 0.39 (DCM/hexane = 3/1).

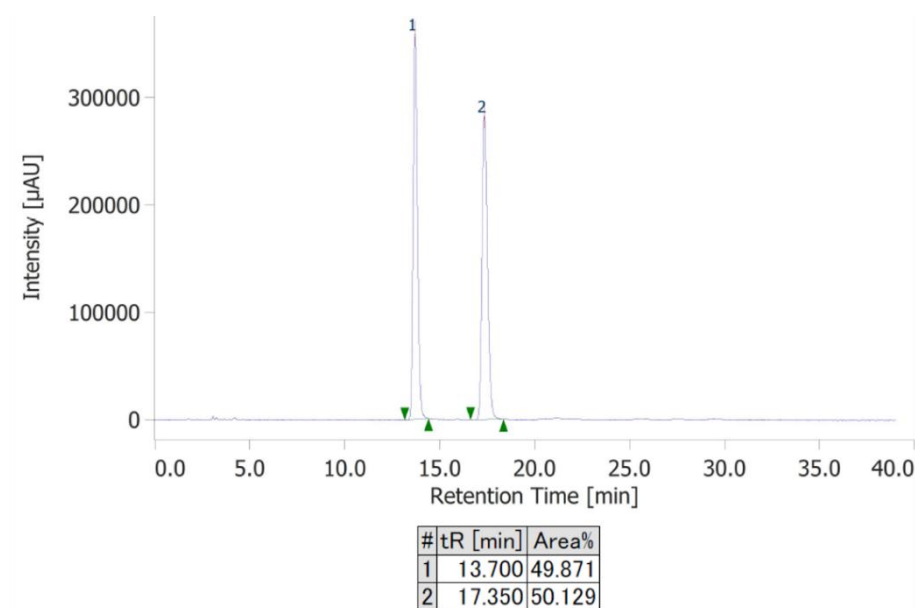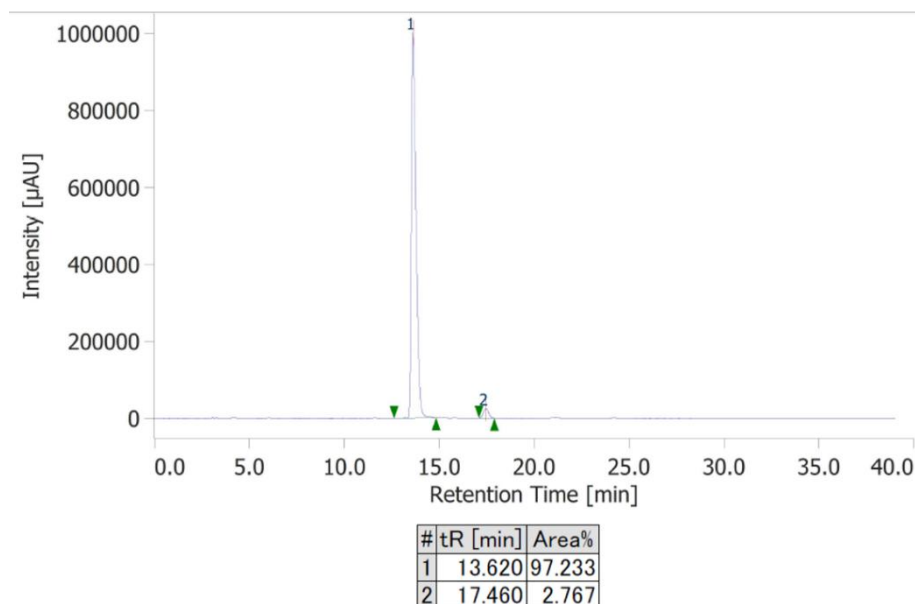

**(S,E)-N,1-diphenyl-3-styryl-116-benzo[e][1,2,4]thiadiazin-1-imine (3ak)**

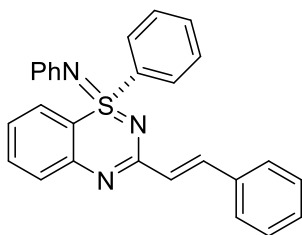

**General Procedure** using compound **1a** (70.2 mg, 0.24 mmol) and **2k** (37.8 mg, 0.2 mmol) and purification by silica gel column chromatography (DCM/hexane = 3/1) afforded **3ak** as a colorless solid (39.1 mg, 47%). **<sup>1</sup>H NMR** (CDCl<sub>3</sub>, 599.67 MHz) δ 8.14 (d, *J* = 7.5 Hz, 2H), 7.89 (d, *J* = 15.8 Hz, 1H), 7.64-7.57 (m, 6H), 7.50 (t, *J* = 7.2 Hz, 1H), 7.45 (d, *J* = 7.5 Hz, 1H), 7.38-7.33 (m, 2H), 7.33-7.29 (m, 1H), 7.15 (t, *J* = 6.9 Hz, 1H), 7.12-7.06 (m, 3H), 6.91-6.85 (m, 3H). **<sup>13</sup>C{<sup>1</sup>H} NMR** (CDCl<sub>3</sub>, 149.41 MHz) δ 160.2, 142.9, 141.3, 139.3, 135.7, 134.5, 133.4, 129.3, 129.2, 128.8, 128.5, 127.9, 127.0, 126.4, 125.4, 123.6, 122.8, 111.7; three aromatic signals were missing probably due to overlapping and broadened signals. **HPLC** (chiral column: DAICEL CHIRALPAK IA; solvent: hexane/2-propanol = 95/5; flow rate: 1.0 mL/min; detection: at 254 nm): *t<sub>R</sub>* = 19.2 (major) and 27.1 (minor) min. **HRMS** (ESI) *m/z*: [M+H]<sup>+</sup> Calcd for C<sub>27</sub>H<sub>22</sub>N<sub>3</sub>S<sup>+</sup>: 420.1529; Found 420.1538. [ $\alpha$ ]<sub>D</sub><sup>23.1</sup> = +22.9 (*c* = 0.12, CHCl<sub>3</sub>). **R<sub>f</sub>** 0.35 (DCM/hexane = 3/1).

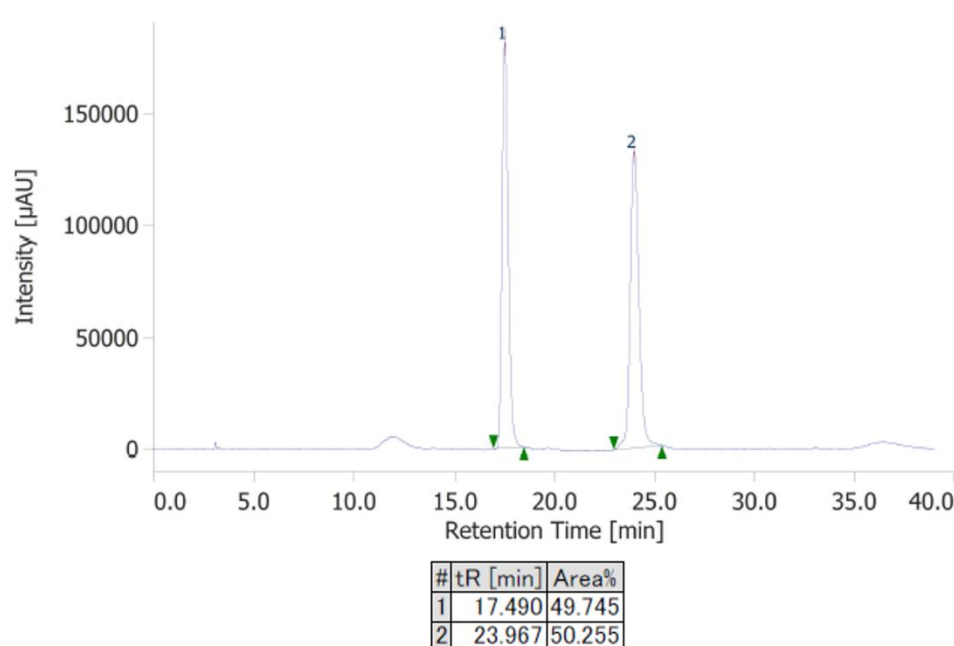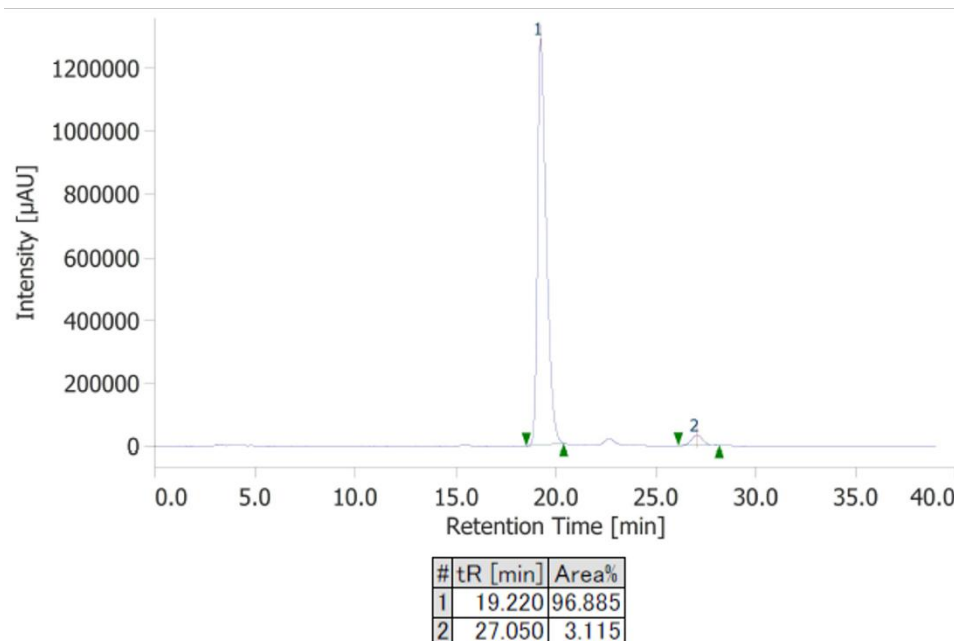

**(S)-3-methyl-N,1-diphenyl-116-benzo[e][1,2,4]thiadiazin-1-imine (3a)**

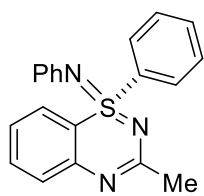

**General Procedure** using compound **1a** (70.2 mg, 0.24 mmol) and **2l** (20.2  $\mu$ l, 0.2 mmol) and purification by silica gel column chromatography (hexane/AcOEt = 2/1) afforded **3a** as a colorless solid (45.0 mg, 68%).  **$^1\text{H}$  NMR** ( $\text{CDCl}_3$ , 600.17 MHz)  $\delta$  8.10 (d,  $J$  = 7.9 Hz, 2H), 7.64-7.59 (m, 3H), 7.50 (t,  $J$  = 7.7 Hz, 1H), 7.45-7.35 (m, 2H), 7.18-7.08 (m, 3H), 6.92 (t,  $J$  = 7.4 Hz, 1H), 6.81 (d,  $J$  = 8.2 Hz, 2H), 2.49 (s, 3H).  **$^{13}\text{C}\{^1\text{H}\}$  NMR** ( $\text{CDCl}_3$ , 150.92 MHz)  $\delta$  164.0, 149.4, 143.1, 141.2, 134.2, 133.2, 129.1, 129.0, 128.3, 127.1, 125.9, 125.2, 123.5, 122.5, 110.2, 27.9 **HPLC** (chiral column: DAICEL CHIRALPAK IA; solvent: hexane/2-propanol = 95/5; flow rate: 1.0 mL/min; detection: at 254 nm):  $t_R$  = 15.6 (major) and 18.2 (minor) min. **HRMS** (ESI)  $m/z$ :  $[\text{M}+\text{H}]^+$  Calcd for  $\text{C}_{20}\text{H}_{18}\text{N}_3\text{S}^+$ : 332.1216; Found 332.1219.  **$[\alpha]_D^{22.8}$**  = +232.2 ( $c$  = 0.25,  $\text{CHCl}_3$ ). **Rf** 0.14 (DCM/hexane = 3/1).

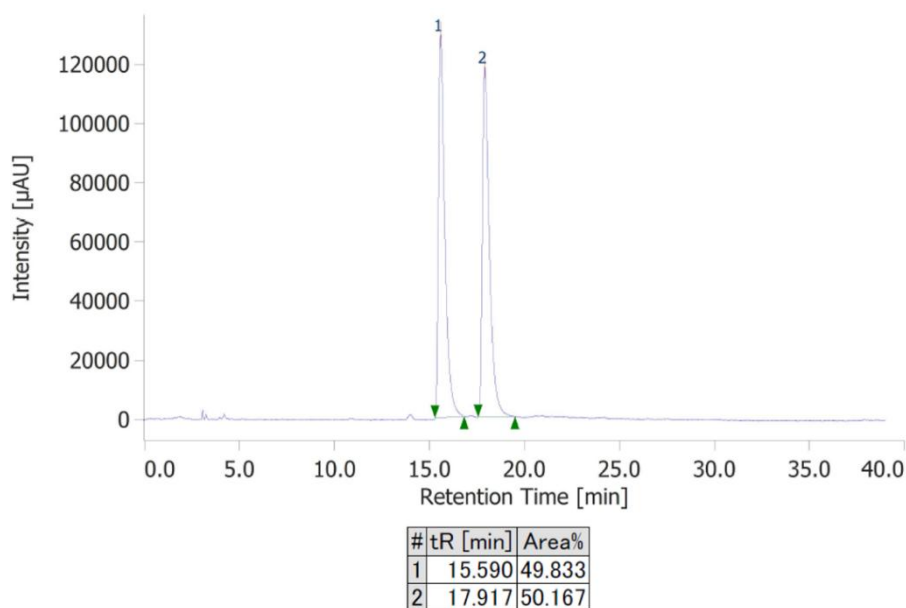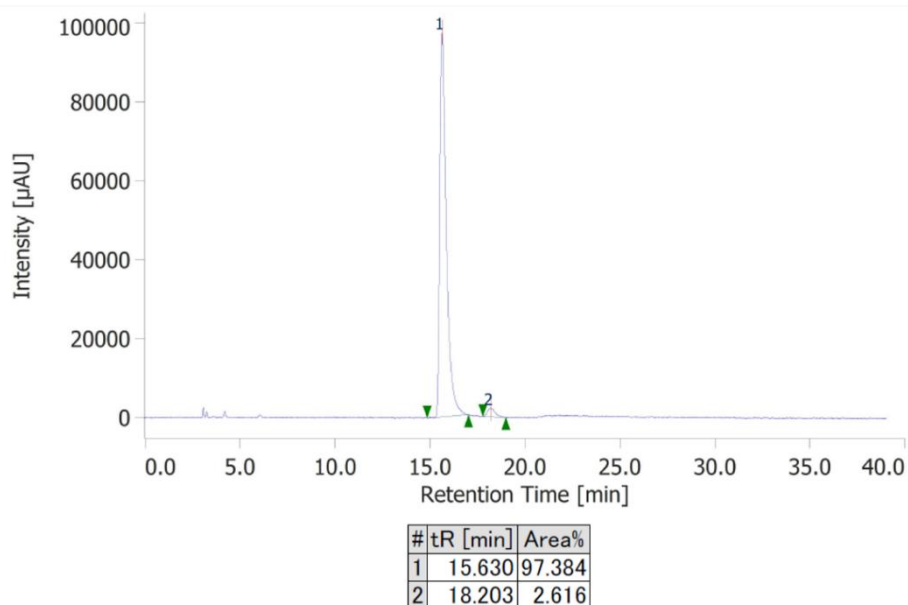



**(S)-6-methyl-N,3-diphenyl-1-(p-tolyl)-116-benzo[e][1,2,4]thiadiazin-1-imine (3bb)**

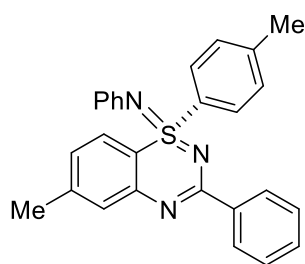

**General Procedure** using compound **1b** (76.9 mg, 0.24 mmol) and **2b** (32.6 mg, 0.20 mmol) and purification by silica gel column chromatography (hexane/AcOEt = 10/1) afforded **3bb** as a colorless solid (62.3 mg, 74%). **<sup>1</sup>H NMR** (CDCl<sub>3</sub>, 600.17 MHz) δ 8.45-8.39 (m, 2H), 8.00 (d, *J* = 8.2 Hz, 2H), 7.51-7.42 (m, 3H), 7.40-7.33 (m, 4H), 7.09-7.03 (m, 2H), 6.97 (d, *J* = 8.2 Hz, 1H), 6.90-6.82 (3H, m), 2.44 (s, 3H), 2.36 (s, 3H). **<sup>13</sup>C{<sup>1</sup>H} NMR** (CDCl<sub>3</sub>, 150.92 MHz) δ 159.9, 149.9, 144.9, 144.0, 143.5, 138.9, 138.1, 130.6, 129.7, 128.9, 128.3, 128.2, 128.0, 127.8, 127.5, 124.9, 123.5, 122.2, 108.3, 21.6, 21.4. **HPLC** (chiral column: DAICEL CHIRALPAK IF; solvent: hexane/2-propanol = 49/1; flow rate: 1.0 mL/min; detection: at 254 nm): *t<sub>R</sub>* = 11.9 (major) and 19.7 (minor) min. **HRMS** (ESI) *m/z*: [M+H]<sup>+</sup> Calcd for C<sub>27</sub>H<sub>24</sub>N<sub>3</sub>S<sup>+</sup>: 422.1685; Found 422.1682. [*α*]<sub>D</sub><sup>22.9</sup> = +133.6 (*c* = 0.50, CHCl<sub>3</sub>). **R<sub>f</sub>** 0.23 (DCM/hexane = 3/1).

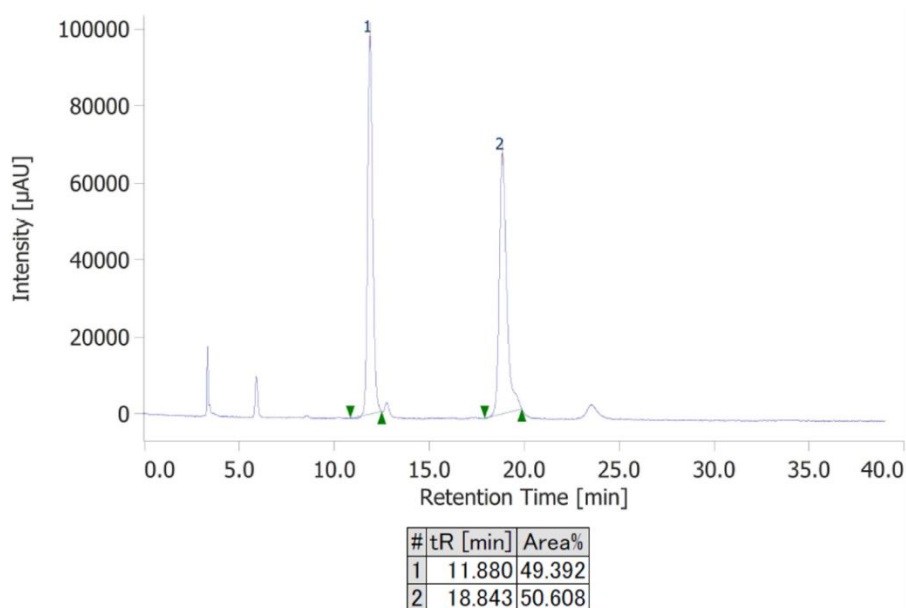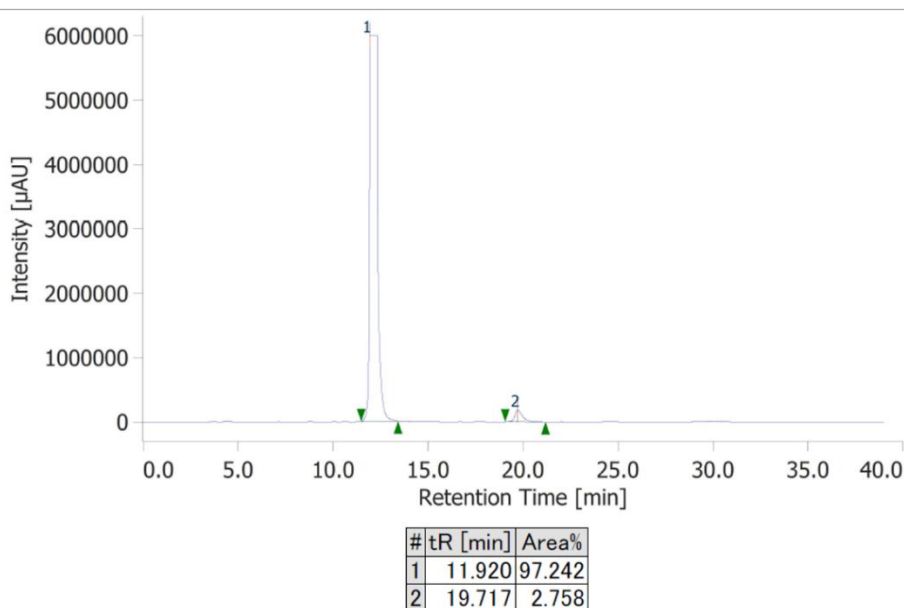

**(S)-6-chloro-1-(4-chlorophenyl)-N,3-diphenyl-1H-benzo[e][1,2,4]thiadiazin-1-imine (3cb)**

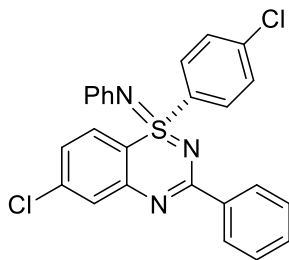

**General Procedure** using compound **1c** (86.7 mg, 0.24 mmol) and **2b** (32.6 mg, 0.20 mmol) and purification by silica gel column chromatography (hexane/AcOEt = 40/1) afforded **3cb** as a colorless solid (73.8 mg, 80%). **<sup>1</sup>H NMR** (CDCl<sub>3</sub>, 600.17 MHz) δ 8.43-8.38 (m, 2H), 8.09-8.04 (m, 2H), 7.58-7.55 (m, 3H), 7.53-7.49 (m, 1H), 7.49-7.45 (m, 2H), 7.38 (d, *J* = 8.2 Hz, 1H), 7.13 (dd, *J* = 8.6, 2.1 Hz, 1H), 7.11-7.07 (2H, m), 6.93-6.89 (m, 1H), 6.86-6.82 (m, 2H). **<sup>13</sup>C{<sup>1</sup>H} NMR** (CDCl<sub>3</sub>, 150.92 MHz) δ 160.7, 151.2, 142.5, 140.3, 140.2, 139.8, 137.4, 131.2, 129.8, 129.5, 129.2, 128.5, 128.2, 127.7, 126.6, 126.4, 123.5, 123.0, 109.0. **HPLC** (chiral column: DAICEL CHIRALPAK IF; solvent: hexane/2-propanol = 49/1; flow rate: 1.0 mL/min; detection: at 254 nm): *t<sub>R</sub>* = 7.7 (major) and 12.5 (minor) min. **HRMS** (ESI) *m/z*: [M+H]<sup>+</sup> Calcd for C<sub>25</sub>H<sub>18</sub>Cl<sub>2</sub>N<sub>3</sub>S<sup>+</sup>: 462.0593; Found 462.0599. [ $\alpha$ ]<sub>D</sub><sup>22.9</sup> = +107.5 (*c* = 0.50, CHCl<sub>3</sub>). **R<sub>f</sub>** 0.43 (DCM/hexane = 3/1).

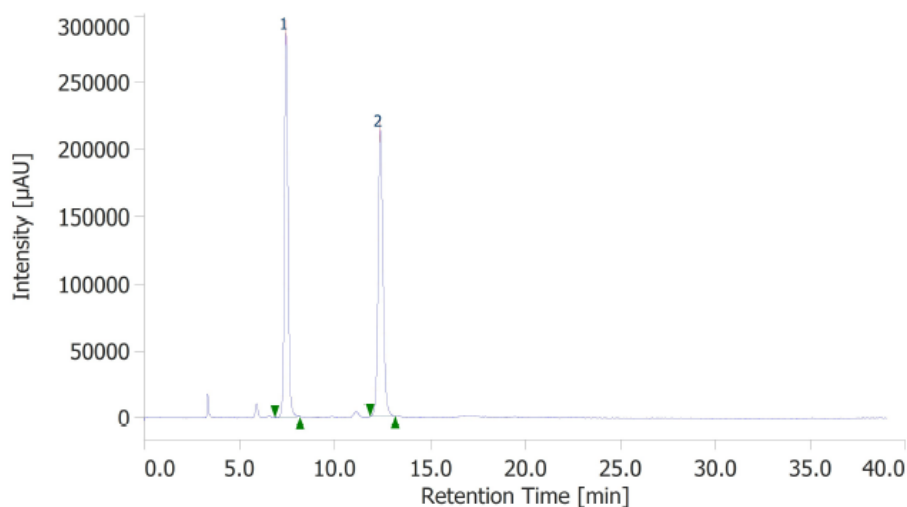

| # | tR [min] | Area%  |
|---|----------|--------|
| 1 | 7.463    | 49.756 |
| 2 | 12.350   | 50.244 |

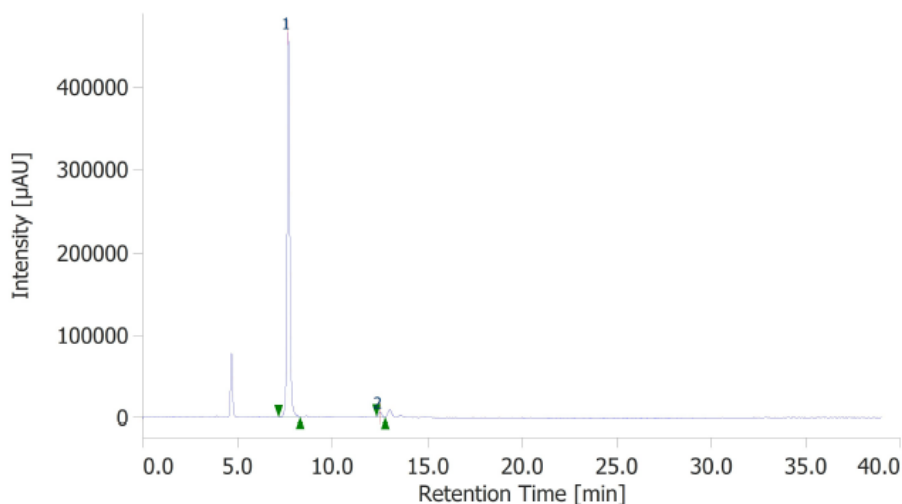

| # | tR [min] | Area%  |
|---|----------|--------|
| 1 | 7.697    | 98.523 |
| 2 | 12.470   | 1.477  |

**(S)-N,3-diphenyl-6-(trifluoromethyl)-1-(4-(trifluoromethyl)phenyl)-1*H*-benzo[e][1,2,4]thiadiazin-1-imine**

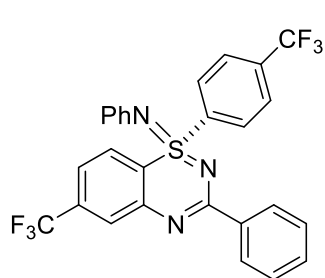

**(3db)**

**General Procedure** using compound **1d** (102.8 mg, 0.24 mmol) and **2b** (32.6 mg, 0.20 mmol) and purification by silica gel column chromatography (hexane/AcOEt = 40/1) afforded **3db** as a colorless solid (93.8 mg, 89%). **<sup>1</sup>H NMR** (CDCl<sub>3</sub>, 600.17 MHz) δ 8.46-8.40 (m, 2H), 8.29 (d, *J* = 8.6 Hz, 2H), 7.91-7.84 (m, 3H), 7.58 (d, *J* = 8.2 Hz, 1H), 7.55-7.51 (m, 1H), 7.51-7.46 (m, 2H), 7.38 (dd, *J* = 8.6, 1.7 Hz, 1H), 7.14-7.09 (m, 2H), 6.96-6.92 (m, 1H), 6.89-6.84 (m, 2H). **<sup>13</sup>C{<sup>1</sup>H} NMR** (CDCl<sub>3</sub>, 150.92 MHz) δ 160.9, 150.5, 144.5, 142.1, 137.1, 136.1 (q, <sup>2</sup>*J*<sub>C-F</sub> = 33.2 Hz), 135.1 (q, <sup>2</sup>*J*<sub>C-F</sub> = 33.2 Hz), 131.5, 129.3, 129.1, 128.6, 128.3, 126.5 (q, <sup>3</sup>*J*<sub>C-F</sub> = 3.9 Hz), 126.2, 126.1 (q, <sup>3</sup>*J*<sub>C-F</sub> = 3.9 Hz), 123.6, 123.4, 123.0 (q, <sup>1</sup>*J*<sub>C-F</sub> = 273.6 Hz), 123.0 (q, <sup>1</sup>*J*<sub>C-F</sub> = 273.6 Hz), 122.9 (q, <sup>3</sup>*J*<sub>C-F</sub> = 3.4 Hz), 113.2. **<sup>19</sup>F NMR** (CDCl<sub>3</sub>, 564.67 MHz) δ -63.2, -63.8. **HPLC** (chiral column: DAICEL CHIRALPAK IF; solvent: hexane/2-propanol = 49/1; flow rate: 1.0 mL/min; detection: at 254 nm): *t*<sub>R</sub> = 4.1 (major) and 7.3 (minor) min. **HRMS** (ESI) *m/z*: [M+H]<sup>+</sup> Calcd for C<sub>27</sub>H<sub>18</sub>F<sub>6</sub>N<sub>3</sub>S<sup>+</sup>: 530.1120; Found 530.1122. [*α*]<sub>D</sub><sup>22.9</sup> = +66.5 (*c* = 0.50, CHCl<sub>3</sub>). **Rf** 0.43 (DCM/hexane = 3/1).

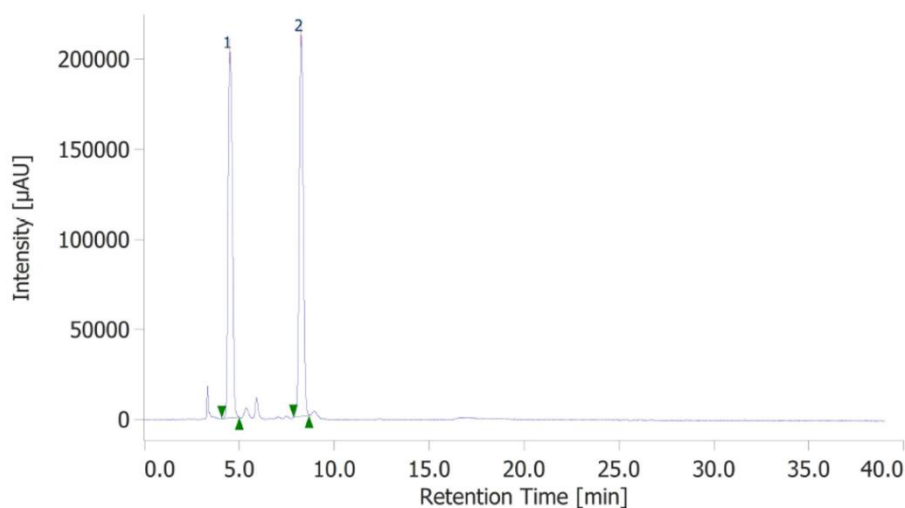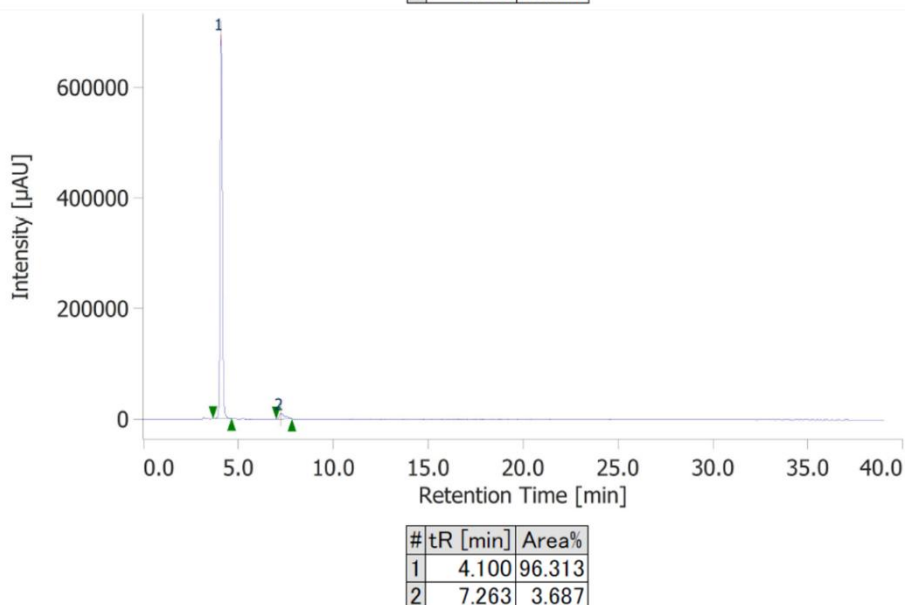

**(S)-7-methyl-N,3-diphenyl-1-(m-tolyl)-1H6-benzo[e][1,2,4]thiadiazin-1-imine (3eb)**

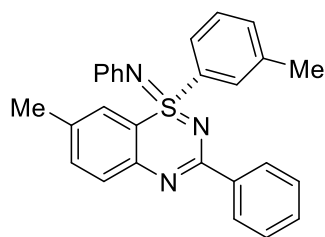

**General Procedure** using compound **1e** (76.9 mg, 0.24 mmol) and **2b** (32.6 mg, 0.20 mmol) and purification by silica gel column chromatography (hexane/AcOEt = 40/1) afforded **3eb** as a colorless solid (70.6 mg, 84%). <sup>1</sup>H NMR (CDCl<sub>3</sub>, 600.17 MHz) δ 8.44-8.37 (m, 2H), 7.95 (d, *J* = 7.9, 1H), 7.93 (s, 1H), 7.50-7.42 (m, 5H), 7.41 (d, *J* = 7.2 Hz, 1H), 7.34 (d, *J* = 7.9 Hz, 1H), 7.23 (s, 1H), 7.10-7.04 (m, 2H), 6.89-6.83 (m, 3H), 2.45 (s, 3H), 2.27 (s, 3H). <sup>13</sup>C{<sup>1</sup>H} NMR (CDCl<sub>3</sub>, 150.92 MHz)

δ 159.1, 147.8, 143.4, 141.5, 139.4, 138.0, 136.2, 135.6, 133.9, 130.5, 129.0, 128.9, 128.5, 128.3, 128.0, 127.9, 125.6, 124.3, 123.4, 122.2, 110.5, 21.4, 21.0. **HPLC** (chiral column: DAICEL CHIRALPAK IF; solvent: hexane/2-propanol = 49/1; flow rate: 1.0 mL/min; detection: at 254 nm): *t*<sub>R</sub> = 8.8 (major) and 13.3 (minor) min. **HRMS** (ESI) *m/z*: [M+H]<sup>+</sup> Calcd for C<sub>27</sub>H<sub>24</sub>N<sub>3</sub>S<sup>+</sup>: 422.1685; Found 422.1684. [*α*]<sub>D</sub><sup>22.9</sup> = +146.5 (*c* = 0.50, CHCl<sub>3</sub>). **R<sub>f</sub>** 0.30 (DCM/hexane = 3/1).

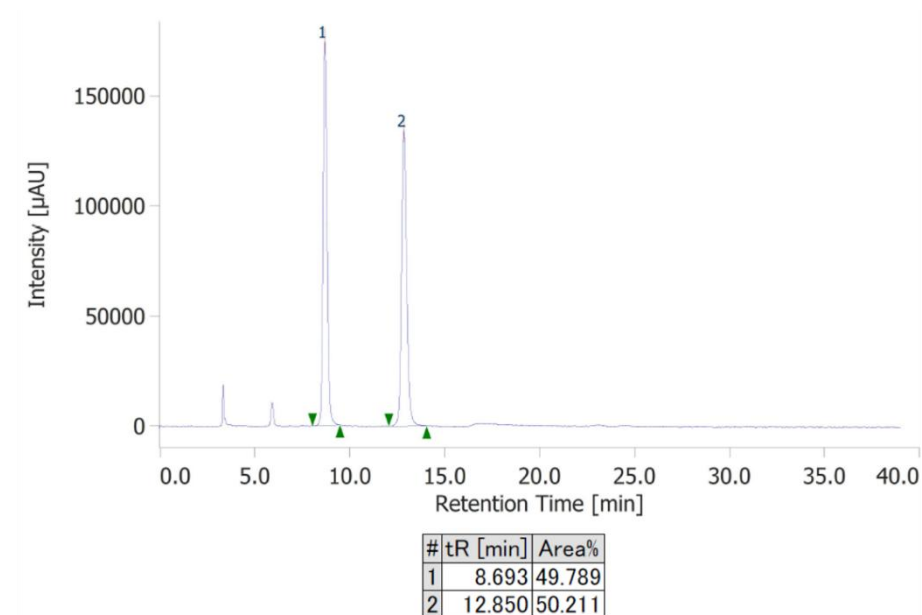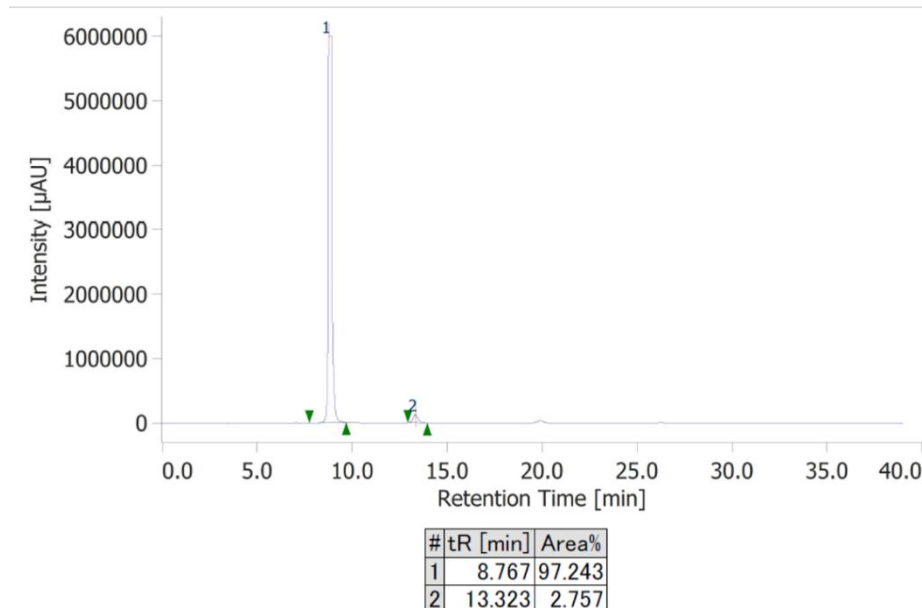

**(S)-N-(4-methoxyphenyl)-1,3-diphenyl-116-benzo[e][1,2,4]thiadiazin-1-imine (3fb)**

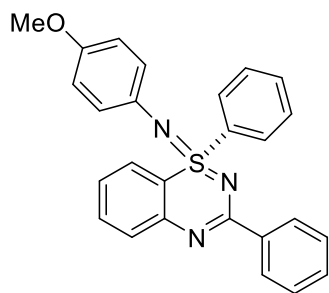

**General Procedure** using compound **1f** (77.4 mg, 0.24 mmol) and **2b** (32.6 mg, 0.20 mmol) and purification by silica gel column chromatography (hexane/DCM= 1/1) afforded **3fb** as a colorless solid (24.9 mg, 30%). **<sup>1</sup>H NMR** (CDCl<sub>3</sub>, 600.17 MHz) δ 8.43 (d, *J* = 5.5 Hz, 2H), 8.15 (*J* = 7.2 Hz, 2H), 7.66-7.56 (m, 3H), 7.56-7.51 (m, 2H), 7.51-7.41 (m, 4H), 7.22-7.13 (m, 1H), 6.81 (d, *J* = 8.6 Hz, 2H), 6.62 (d, *J* = 8.6 Hz, 2H), 3.65 (s, 3H). **<sup>13</sup>C{<sup>1</sup>H} NMR** (CDCl<sub>3</sub>, 150.92 MHz) δ 160.0, 155.4, 150.1, 141.5, 138.1, 136.0, 134.1, 133.1, 130.8, 129.2, 128.5, 128.3, 128.2,

126.0, 125.3, 124.8, 114.4, 112.8, 111.1, 55.3. **HPLC** (chiral column: DAICEL CHIRALPAK IF; solvent: hexane/2-propanol = 49/1; flow rate: 1.0 mL/min; detection: at 254 nm): *t<sub>R</sub>* = 17.9 (major) and 25.6 (minor) min. **HRMS** (ESI) *m/z*: [M+H]<sup>+</sup> Calcd for C<sub>26</sub>H<sub>22</sub>N<sub>3</sub>OS<sup>+</sup>: 424.1478; Found 424.1478. [ $\alpha$ ]<sub>D</sub><sup>22.9</sup> = +633.8 (*c* = 0.17, CHCl<sub>3</sub>). **R<sub>f</sub>** 0.13 (hexane/DCM= 1/3).

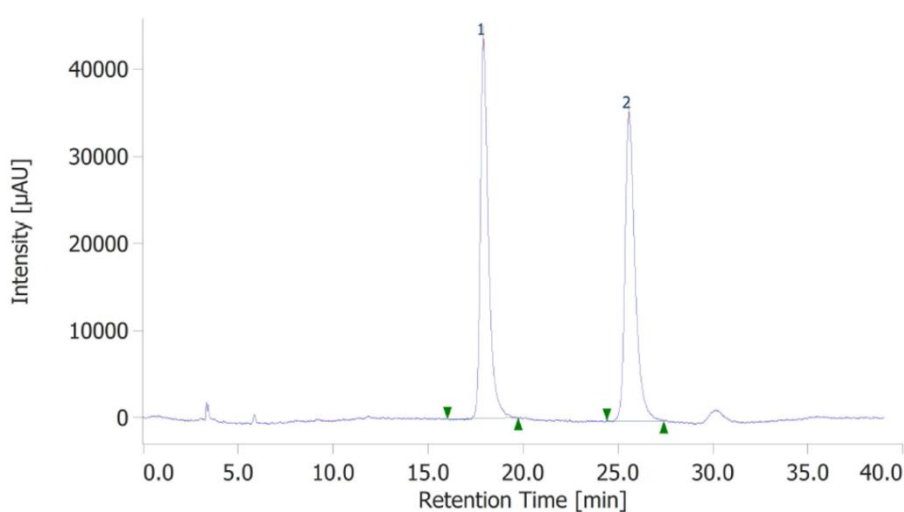

| # | tR [min] | Area%  |
|---|----------|--------|
| 1 | 17.917   | 49.739 |
| 2 | 25.577   | 50.261 |

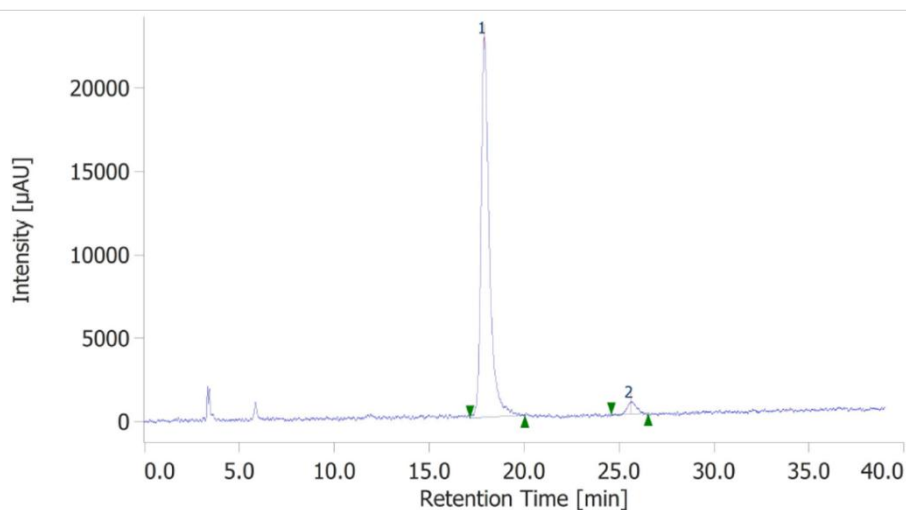

| # | tR [min] | Area%  |
|---|----------|--------|
| 1 | 17.897   | 96.505 |
| 2 | 25.637   | 3.495  |

**(S)-N-(4-chlorophenyl)-1,3-diphenyl-116-benzo[e][1,2,4]thiadiazin-1-imine (3gb)**

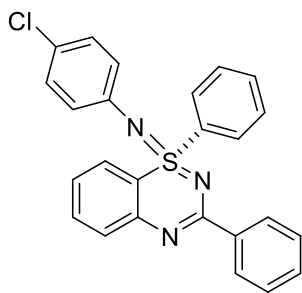

**General Procedure** using compound **1g** (78.4 mg, 0.24 mmol) and **2b** (32.6 mg, 0.20 mmol) and purification by silica gel column chromatography (hexane/AcOEt = 10/1) afforded **3gb** as a colorless solid (29.7 mg, 35%). <sup>1</sup>H NMR (CDCl<sub>3</sub>, 600.17 MHz) δ 8.44-8.40 (m, 2H), 8.15-8.12 (m, 2H), 7.64-7.53 (m, 5H), 7.51-7.42 (m, 4H), 7.21-7.16 (m, 1H), 7.05-6.99 (m, 2H), 6.81-6.75 (m, 2H). <sup>13</sup>C{<sup>1</sup>H} NMR (CDCl<sub>3</sub>, 150.92 MHz) δ 160.0, 150.0, 142.0, 141.3, 137.8, 134.3, 133.3, 131.0, 129.3, 129.1, 128.4, 128.4, 128.2, 127.9, 126.2, 125.1, 124.8, 110.5; one aromatic signal was missing

probably due to overlap. **HPLC** (chiral column: DAICEL CHIRALPAK IF; solvent: hexane/2-propanol = 49/1; flow rate: 1.0 mL/min; detection: at 254 nm): t<sub>R</sub> = 9.3 (major) and 11.5 (minor) min. **HRMS** (ESI) m/z: [M+H]<sup>+</sup> Calcd for C<sub>25</sub>H<sub>19</sub>N<sub>3</sub>SCl<sup>+</sup>: 428.0983; Found 428.0970. [α]<sub>D</sub><sup>22.7</sup> = +88.2 (c = 0.20, CHCl<sub>3</sub>). **Rf** 0.45 (hexane/EtOAc = 5/1).

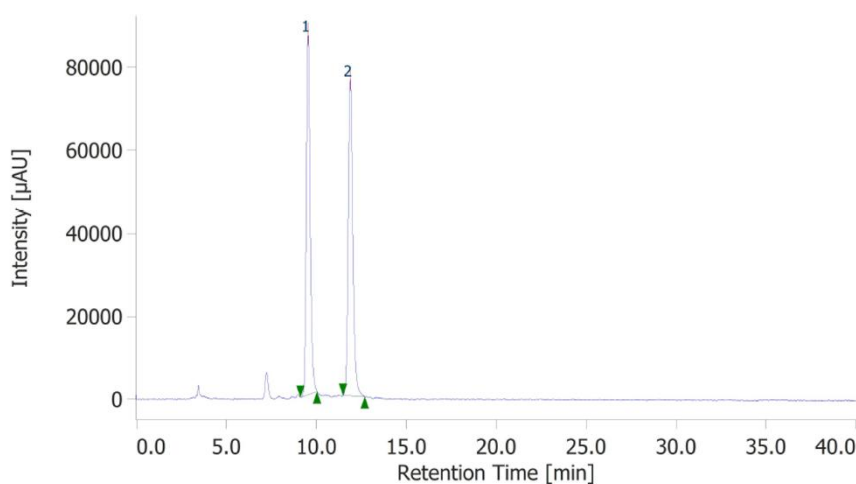

| # | tR [min] | Area%  |
|---|----------|--------|
| 1 | 9.543    | 49.073 |
| 2 | 11.887   | 50.927 |

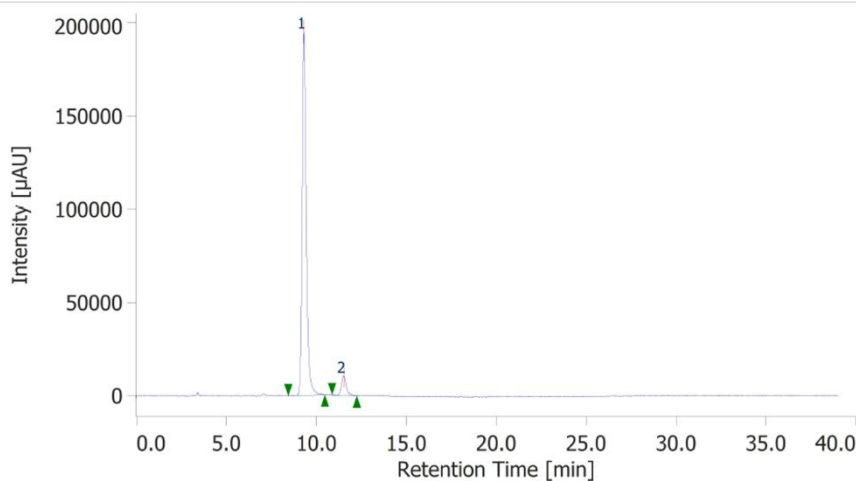

| # | tR [min] | Area%  |
|---|----------|--------|
| 1 | 9.313    | 94.221 |
| 2 | 11.517   | 5.779  |

**(S)-N-(3-chlorophenyl)-1,3-diphenyl-1*h***-benzo[e][1,2,4]thiadiazin-1-imine (**3hb**)

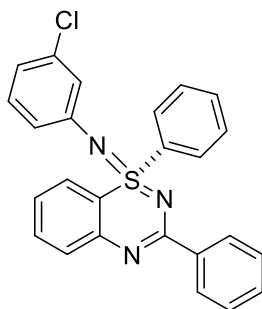

**General Procedure** using compound **1h** (78.4 mg, 0.24 mmol) and **2b** (32.6 mg, 0.20 mmol) and purification by silica gel column chromatography (hexane/AcOEt = 10/1) afforded **3hb** as a colorless solid (69.1 mg, 81%). **<sup>1</sup>H NMR** (CDCl<sub>3</sub>, 600.17 MHz) δ 8.46-8.41 (m, 2H), 8.16-8.11 (m, 2H), 7.67-7.53 (m, 5H), 7.53-7.44 (m, 4H), 7.22-7.18 (m, 1H), 7.01 (t, *J* = 2.0 Hz, 1H), 6.94 (t, *J* = 8.0 Hz, 1H), 6.88-6.83 (m, 1H), 6.63-6.59 (m, 1H). **<sup>13</sup>C{<sup>1</sup>H} NMR** (CDCl<sub>3</sub>, 150.92 MHz) δ 159.7, 149.8, 144.8, 141.3, 137.8, 134.4, 134.3, 133.3, 130.9, 129.9, 129.2, 128.4, 128.4, 128.3, 128.2, 126.3, 125.1, 124.6, 122.6, 120.8, 110.4. **HPLC** (chiral column: DAICEL CHIRALPAK IF; solvent:

hexane/2-propanol = 49/1; flow rate: 1.0 mL/min; detection: at 254 nm): *t<sub>R</sub>* = 8.8 (major) and 11.5 (minor) min.

**HRMS** (ESI) *m/z*: [M+H]<sup>+</sup> Calcd for C<sub>25</sub>H<sub>19</sub>N<sub>3</sub>SCl<sup>+</sup>: 428.0983; Found 428.0978. [*α*]<sub>D</sub><sup>22.8</sup> = +86.7 (*c* = 0.50, CHCl<sub>3</sub>).

**R<sub>f</sub>** 0.45 (hexane/EtOAc = 5/1).

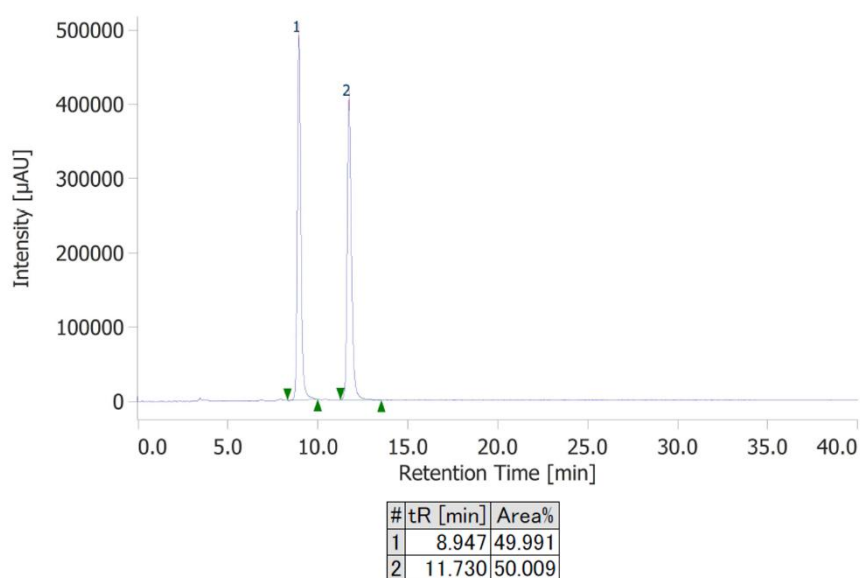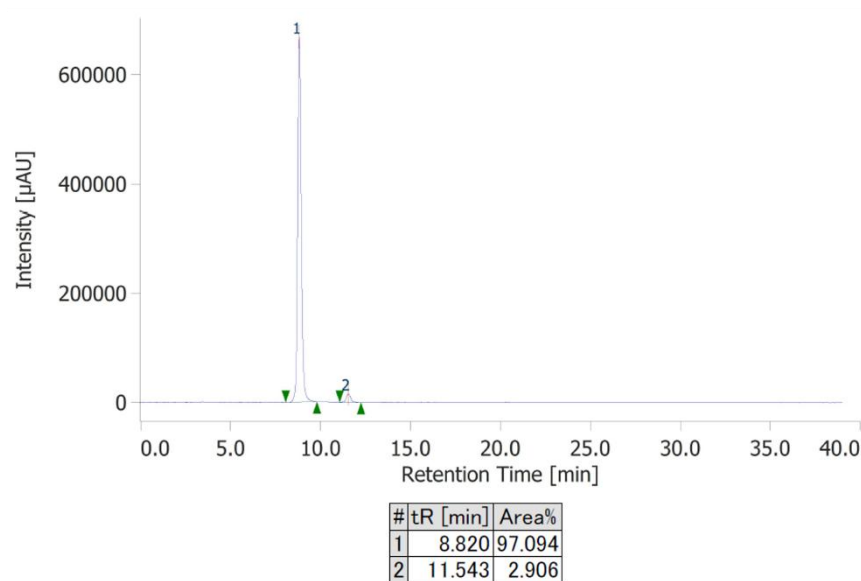

**(S)-N-(2-chlorophenyl)-1,3-diphenyl-1*l*6-benzo[e][1,2,4]thiadiazin-1-imine (**3ib**)**

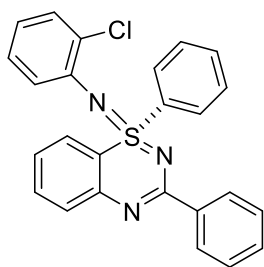

**General Procedure** using compound **1i** (78.4 mg, 0.24 mmol) and **2b** (32.6 mg, 0.20 mmol) and purification by silica gel column chromatography (hexane/AcOEt = 10/1) afforded **3ib** as a colorless solid (67.3 mg, 79%). **<sup>1</sup>H NMR** (CDCl<sub>3</sub>, 600.17 MHz) δ 8.51-8.44 (m, 2H), 8.32-8.22 (m, 2H), 7.70-7.58 (m, 3H), 7.58-7.45 (m, 6H), 7.30 (dd, *J* = 7.8, 1.5 Hz, 1H), 7.21-7.13 (m, 1H), 6.84 (td, *J* = 7.6, 1.5 Hz, 1H), 6.80 (td, *J* = 7.6, 1.5 Hz, 1H), 6.68 (dd, *J* = 7.9, 1.5 Hz, 1H). **<sup>13</sup>C{<sup>1</sup>H} NMR** (CDCl<sub>3</sub>, 150.92 MHz) δ 159.5, 150.0, 141.7, 140.6, 137.8, 134.4, 133.4, 131.0, 130.0, 130.0, 129.3, 128.7, 128.5, 128.2, 127.2, 126.3, 125.3, 123.3, 122.3, 110.3; one aromatic signal was missing probably due to overlap. **HPLC** (chiral column: DAICEL CHIRALPAK IF; solvent: hexane/2-propanol = 49/1; flow rate: 1.0 mL/min; detection: at 254 nm): *t<sub>R</sub>* = 7.8 (major) and 8.6 (minor) min. **HRMS** (ESI) *m/z*: [M+H]<sup>+</sup> Calcd for C<sub>25</sub>H<sub>19</sub>N<sub>3</sub>SCl<sup>+</sup>: 428.0983; Found 428.0974. [α]<sub>D</sub><sup>22.8</sup> = +51.9 (*c* = 0.50, CHCl<sub>3</sub>). **R<sub>f</sub>** 0.45 (hexane/EtOAc = 5/1).

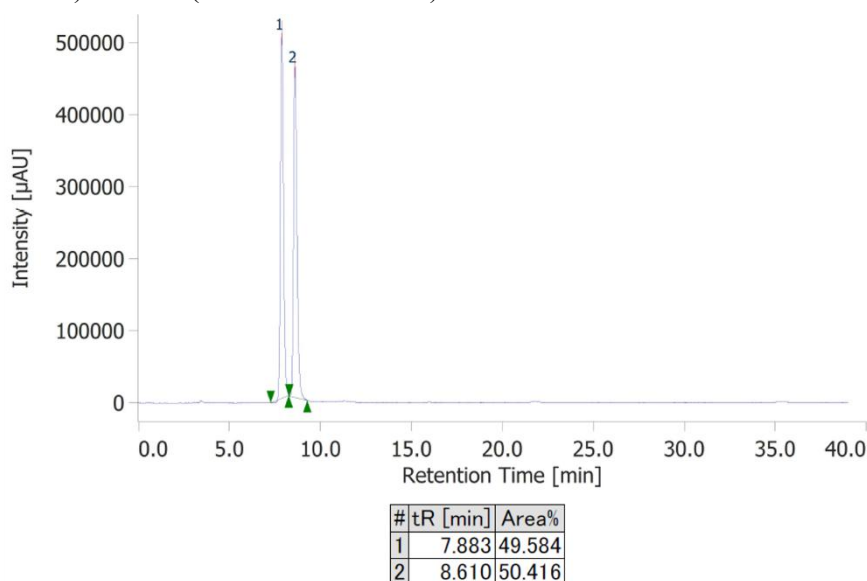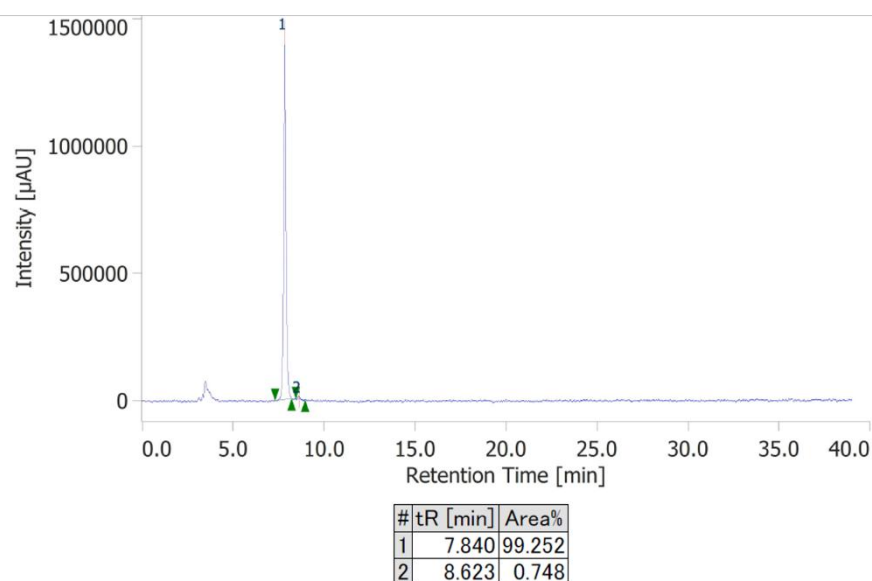



### 2-3. Determination of the absolute configuration of **3aa**

#### Single crystal X-ray crystallography of **3aa**

A single crystal of **3aa** suitable for X-ray diffraction analysis (XRD) was obtained by recrystallization from pentane/DCE. Measurement was performed on a RIGAKU XtaLAB Synergy-R/Cu system with 1.2 kW PhotonJet-R/Cu microfocus rotating anode using graphite monochromated CuK $\alpha$  radiation source ( $\lambda = 1.5418 \text{ \AA}$ ) and HyPix-6000HE detector. Cell parameters were determined and refined, and raw frame data were integrated using CrysAlisPro (Agilent Technologies, 2010). The structures were solved by direct methods with SHELXT 2018/2 and refined by full-matrix least-squares techniques against  $F^2$  with SHELXL-2019/3 by using Olex2 software package. The non-hydrogen atoms were anisotropically refined, and hydrogen atoms were placed using AFIX instructions. The detailed crystallographic data are available as a crystallographic information file (CIF), which is available from CCDC (Deposition Number: 2423806). The ORTEP-3 program was used to draw the molecule structures. The structure and crystal data are shown in **Figure S1** and **Table S1**.

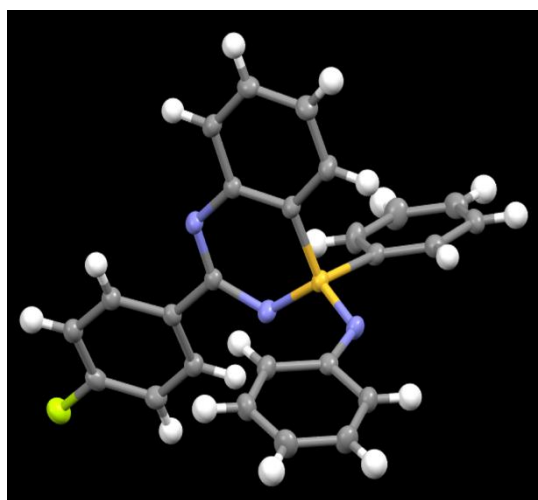

**Figure S1.** Structure of **3aa**

**Table S1.** Crystal data and structure refinement for **3aa**

|                        |                                                    |                  |
|------------------------|----------------------------------------------------|------------------|
| Identification code    | am02046_auto                                       |                  |
| Empirical formula      | C <sub>25</sub> H <sub>18</sub> F N <sub>3</sub> S |                  |
| Formula weight         | 411.48                                             |                  |
| Temperature            | 100.00(10) K                                       |                  |
| Wavelength             | 1.54184 Å                                          |                  |
| Crystal system         | Monoclinic                                         |                  |
| Space group            | P 1 21 1                                           |                  |
| Unit cell dimensions   | a = 8.40678(5) Å                                   | a = 90°.         |
|                        | b = 12.62273(9) Å                                  | b = 91.4256(5)°. |
|                        | c = 18.65018(10) Å                                 | g = 90°.         |
| Volume                 | 1978.48(2) Å <sup>3</sup>                          |                  |
| Z                      | 4                                                  |                  |
| Density (calculated)   | 1.381 Mg/m <sup>3</sup>                            |                  |
| Absorption coefficient | 1.667 mm <sup>-1</sup>                             |                  |

|                                   |                                             |
|-----------------------------------|---------------------------------------------|
| F(000)                            | 856                                         |
| Crystal size                      | 0.2 x 0.15 x 0.15 mm <sup>3</sup>           |
| Theta range for data collection   | 2.370 to 78.783°.                           |
| Index ranges                      | -10<=h<=10, -15<=k<=14, -23<=l<=23          |
| Reflections collected             | 78131                                       |
| Independent reflections           | 8270 [R(int) = 0.0403]                      |
| Completeness to theta = 67.684°   | 100.0 %                                     |
| Absorption correction             | Semi-empirical from equivalents             |
| Max. and min. transmission        | 1.00000 and 0.70830                         |
| Refinement method                 | Full-matrix least-squares on F <sup>2</sup> |
| Data / restraints / parameters    | 8270 / 1 / 541                              |
| Goodness-of-fit on F <sup>2</sup> | 1.027                                       |
| Final R indices [I>2sigma(I)]     | R1 = 0.0360, wR2 = 0.0955                   |
| R indices (all data)              | R1 = 0.0362, wR2 = 0.0957                   |
| Absolute structure parameter      | 0.023(11)                                   |
| Extinction coefficient            | n/a                                         |
| Largest diff. peak and hole       | 0.720 and -0.457 e.Å <sup>-3</sup>          |

### 3. DFT calculations and non-covalent interaction plots.

All DFT calculations and structure optimizations were performed using Gaussian 16 Rev C.02 program package<sup>[S5]</sup> unless otherwise noted.

Cp\*Co(III)-catalyzed C–H activation generally proceed with an assistance of directing groups such as a imine group in sulfondiimines. We initially performed DFT calculations to elucidate a spin state in the transition state and whether N–H or N-aryl group is coordinating to the cobalt center in the transition state. We first prepared 4 transition states that possess  $\mu^1$ -acetate and NH-coordinating sulfondiimine or NPh-coordinating sulfondiimine on the cobalt center (s\_NH, s\_NPh for the metallacycle with (*S*)-configuration, r\_NH, r\_NPh for the metallacycle with (*R*)-configuration). The structures were roughly optimized as the singlet and triplet states at the (U)M06L/def2-SVP<sup>[S6]</sup> level of theory with the fixed key 6 atoms (Co, C and H to be cleaved, carbonyl C and two O of the carboxylate). These structures were fully optimized to transition state structures (first-order saddle points) at the (U)M06L/def2-SVP level of theory. The vibrational calculations were performed at the optimized geometry to confirm that the obtained structures were the desired transition state structures and to calculate the correction terms for Gibbs free energies. To obtain more accurate electronic energies, single point energies with the optimized geometries were calculated at the (U)M06/def2-TZVPP<sup>[S7]</sup> level of theory with SMD implicit solvation (solvent = 2-methyl-2-propanol).<sup>[S8]</sup> The Gibbs free energies are summarized in **Table S2**. In all transition states, the singlet states were more stable than the corresponding triplet states. The singlet s\_NH was the most stable, but the differences of Gibbs free energies with the singlet NPh-coordinating structures were not negligible. As all the triplet states showed significantly higher energies than the corresponding singlet states, the following calculations were performed assuming the singlet states.

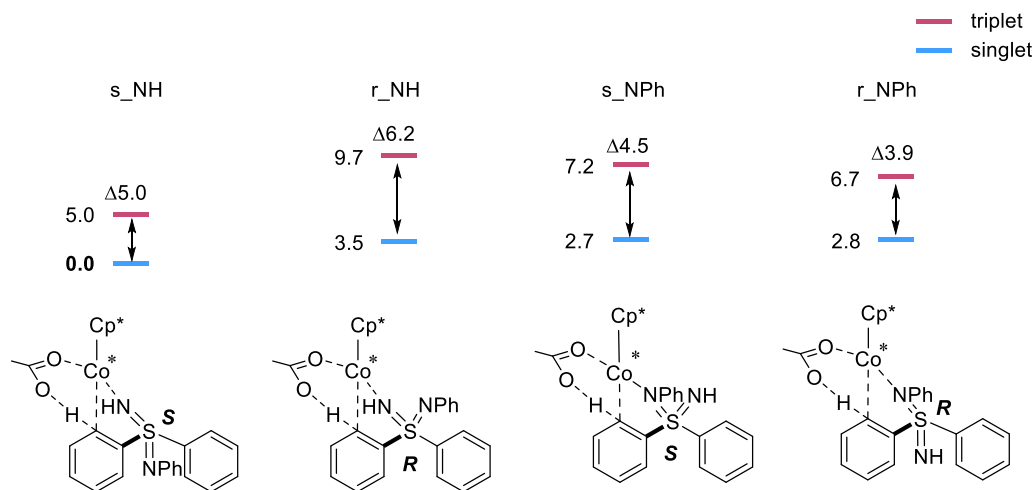

**Figure S2.** Comparison of transition state Gibbs energies (kcal/mol) of the singlet and triplet states

**Table S2.** Parameters of TS structures

|               | EE (M06/def2-TZVPP+SMD( <i>t</i> BuOH)) (Hartrees) | Imaginary Frequency (cm <sup>-1</sup> ) | G correction term (Hartrees) | G (Hartrees) | Relative G to s_NH (kcal/mol) |
|---------------|----------------------------------------------------|-----------------------------------------|------------------------------|--------------|-------------------------------|
| singlet_s_NH  | -3203.86426685                                     | -1525.0895                              | 0.500237                     | -3203.36403  | 0                             |
| singlet_r_NH  | -3203.85670938                                     | -1436.4002                              | 0.498308                     | -3203.358401 | 3.531921                      |
| singlet_s_NPh | -3203.86157585                                     | -1443.3729                              | 0.501826                     | -3203.35975  | 2.685743                      |
| singlet_r_NPh | -3203.86002976                                     | -1436.3116                              | 0.500388                     | -3203.359642 | 2.75357                       |
| triplet_s_NH  | -3203.8485254                                      | -1473.9925                              | 0.492401                     | -3203.356124 | 4.960749                      |

|               |                |            |          |              |          |
|---------------|----------------|------------|----------|--------------|----------|
| triplet_r_NH  | -3203.84283027 | -1286.1958 | 0.494282 | -3203.348548 | 9.714846 |
| triplet_s_NPh | -3203.85052069 | -1202.8165 | 0.497972 | -3203.352549 | 7.204543 |
| triplet_r_NPh | -3203.84832575 | -1522.0098 | 0.494951 | -3203.353375 | 6.686182 |

To reveal the key effects of **A5** on high enantioselectivity in the transition state, we carried out DFT calculation for the asymmetric reaction. We prepared eight initial structures (r1\_NH\_init, r1\_NPh\_init, r2\_NH\_init, r2\_NPh\_init for the cyclized product with (*R*)-configuration, s1\_NH\_init, s1\_NPh\_init, s2\_NH\_init, s2\_NPh\_init for the cyclized product with (*S*)-configuration shown in **Figure S3**) that possess a common key core structure near to the transition state for the C–H bond cleavage (optimized as a singlet state near to the first-order saddle point at the M06L/LANL2DZ level of theory,<sup>[S9,S10]</sup> but not completely converged).

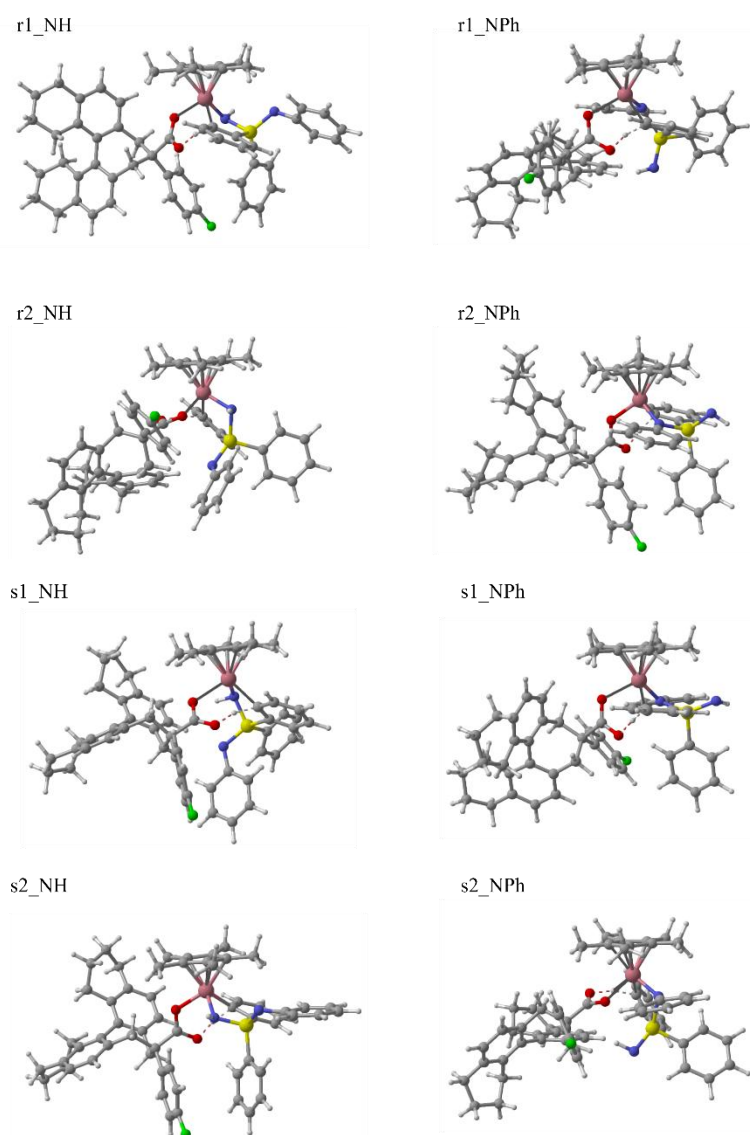

**Figure S3.** Initial structures for conformation searches

With these initial structures, we performed conformational searches using Grimme's crest 2.12<sup>[S11]</sup> and xtb 6.6.1<sup>[S12]</sup> programs. To keep the structures near to the desired transition state rather than local minima, key 6 atoms (Co, C and H to be cleaved, carbonyl C and two O of the carboxylate) were fixed with a force constant = 0.5. The

conformation searches were run at GFN2-xTB level with iMTD-GC algorithm, and the energy threshold was set to 10 kcal/mol for each search. Total 2391 conformers to afford the (*S*)-configuration product and 3013 conformers to afford the (*R*)-configuration product were generated. The conformers obtained from r1\_NPh\_init, r2\_NH\_init, s1\_NH\_init, and s2\_NPh\_init are 5.0 kcal/mol higher in energy than the most stable conformer obtained from s2\_NH\_init, and thus only the most stable conformer of each initial structure was used for further calculations. To further reduce the calculation cost, the similar conformers were summarized using cregen tool implemented in crest (ewin 6, rthr 1, ethr 2), and total 19 conformers remained. These structures were partially optimized with fixing key 6 atoms (Co, C and H to be cleaved, two O of the carboxylate) at the M06L/LANL2DZ level of theory (opt = loose, maxcycle = 20). These structures were fully optimized to transition state structures (first-order saddle points) at the M06L/def2-SVP level of theory. The vibrational calculations were performed at the optimized geometry to confirm that the obtained structures were the desired transition state structures and to calculate the correction terms for Gibbs free energies. To obtain more accurate electronic energies, single point energies with the optimized geometries were calculated at the M06/def2-TZVPP level of theory with SMD implicit solvation (solvent = 2-methyl-2-propanol). The calculated free energies of the final 19 transition state structures are summarized in **Table S3** and **S4**.

Based on the calculated free energies, s2\_NH\_2 was the most plausible transition state structure to give the major *S*-enantiomer (TS<sub>major1</sub>), and s2\_NH\_1 afford the second most stable structure (TS<sub>major2</sub>). s2\_NH\_3 had very similar structure and Gibbs energy that are enough to be regarded as the same as s2\_NH\_1. Other structures could be negligible. r2\_NPh\_1 was the most stable structure to afford the minor product with (*R*)-configuration (TS<sub>minor</sub>), and other structures could be negligible. Thus, we provided the discussion based on s2\_NH\_2 (TS<sub>major1</sub>) and s2\_NH\_1 (TS<sub>major2</sub>). r2\_NPh\_1 (TS<sub>minor</sub>) was the most plausible transition state structures to give the minor (*R*)-enantiomer. For these three structures, IRC calculations were performed at the M06L/def2-SVP level of theory to confirm that they are the desired transition states for C–H bond cleavage. NCI plots were calculated by Multiwfn 3.7<sup>[S13]</sup> using the wavefunction files (wfx files) generated at the single point energy calculations (M06/def2-TZVPP+SMD(*t*BuOH)), and visualized by VMD 1.9.4 (**Figure 15**).<sup>[S14]</sup>

**Table S3.** Parameters of TS structures to afford major *S*-product

|                                                         | EE (M06/def2-TZVPP+SMD ( <i>t</i> BuOH)) (Hartrees) | Imaginary Frequency (cm <sup>-1</sup> ) | G correction term (Hartrees) | G (Hartrees)          | Relative G to s2_NH_2 (kcal/mol) |
|---------------------------------------------------------|-----------------------------------------------------|-----------------------------------------|------------------------------|-----------------------|----------------------------------|
| s1_NH                                                   | -4385.35567878                                      | -1502.5                                 | 0.933146                     | -<br>4384.42253278    | 4.50                             |
| s1_NPh_1                                                | -4385.35986930                                      | -1464.52                                | 0.935711                     | -<br>4384.42415830    | 3.48                             |
| s1_NPh_2                                                | -4385.35751284                                      | -1462.81                                | 0.937081                     | -<br>4384.42043184    | 5.82                             |
| s1_NPh_3                                                | -4385.35696306                                      | -1445.27                                | 0.934814                     | -<br>4384.42214906    | 4.74                             |
| s1_NPh_4                                                | -4385.34992871                                      | -1426.63                                | 0.933346                     | -<br>4384.41658271    | 8.24                             |
| s1_NPh_5                                                | -4385.35377113                                      | -1456.17                                | 0.934992                     | -<br>4384.41877913    | 6.86                             |
| <b>s2_NH_1</b><br><b>(similar to</b><br><b>s2_NH_3)</b> | <b>-4385.35805015</b>                               | <b>-1455.31</b>                         | <b>0.931495</b>              | <b>-4384.42655515</b> | <b>1.98</b>                      |
| <b>s2_NH_2</b>                                          | <b>-4385.36412869</b>                               | <b>-1448.92</b>                         | <b>0.934421</b>              | <b>-4384.42970769</b> | <b>0.00</b>                      |
| s2_NH_3                                                 | -4385.35805017                                      | -1455.32                                | 0.931495                     | -4384.42655517        | 1.98                             |

|        |                |          |          |                |      |
|--------|----------------|----------|----------|----------------|------|
| s2 NPh | -4385.35714304 | -1470.98 | 0.934714 | -4384.42242904 | 4.57 |
|--------|----------------|----------|----------|----------------|------|

**Table S4.** Parameters of TS structures to give minor *R*-product

|                        | EE (M06/def2-TZVPP+SMD( <i>t</i> BuOH)) (Hartrees) | Imaginary Frequency (cm <sup>-1</sup> ) | G correction term (Hartrees) | G (Hartrees)          | Relative G to s2_NH_2 (kcal/mol) |
|------------------------|----------------------------------------------------|-----------------------------------------|------------------------------|-----------------------|----------------------------------|
| r1_NH_1                | -4385.35079584                                     | -1487.81                                | 0.931330                     | -4384.41946584        | 6.43                             |
| r1_NH_2                | -4385.34934015                                     | -1445.65                                | 0.931953                     | -4384.41738715        | 7.73                             |
| r1_NH_3                | -4385.34627232                                     | -1434.68                                | 0.931286                     | -4384.41498632        | 9.24                             |
| r1_NH_4                | -4385.34419791                                     | -1433.5                                 | 0.931336                     | -4384.41286191        | 10.57                            |
| r1_NPh                 | -4385.35745525                                     | -1441.73                                | 0.934678                     | -4384.42277725        | 4.35                             |
| r2_NH                  | -4385.35820841                                     | -1509.26                                | 0.934163                     | -4384.42404541        | 3.55                             |
| <b><i>r2_NPh_1</i></b> | <b>-4385.36036832</b>                              | <b>-1441.6</b>                          | <b>0.934436</b>              | <b>-4384.42593232</b> | <b>2.37</b>                      |
| r2_NPh_2               | -4385.35713533                                     | -1466.75                                | 0.934534                     | -4384.42260133        | 4.46                             |
| r2_NPh_3               | -4385.35370708                                     | -1440.37                                | 0.934710                     | -4384.41899708        | 6.72                             |

#### 4. Reference

- [S1] Huang, L.-T.; Kitakawa, Y.; Yamada, K.; Kamiyama, F.; Kojima, M.; Yoshino, T.; Matsunaga, S. *Angew. Chem. Int. Ed.* **2023**, *62*, e202305480.
- [S2] J. Park, S. Chang, *Angew. Chem. Int. Ed.* **2015**, *54*, 14103.
- [S3] a) S. Fukagawa, Y. Kato, R. Tanaka, M. Kojima, T. Yoshino, S. Matsunaga, *Angew. Chem. Int. Ed.* **2019**, *58*, 1153; b) D. Sekine, K. Ikeda, S. Fukagawa, M. Kojima, T. Yoshino, S. Matsunaga, *Organometallics* **2019**, *38*, 3921; c) L. Lin, S. Fukagawa, D. Sekine, E. Tomita, T. Yoshino, S. Matsunaga, *Angew. Chem. Int. Ed.* **2018**, *57*, 12048; d) Y. Kato, L. Lin, M. Kojima, T. Yoshino, S. Matsunaga, *ACS Catal.* **2021**, *11*, 4271; e) Hirata, Y.; Sekine, D.; Kato, Y.; Lin, L.; Kojima, M.; Yoshino, T.; Matsunaga, S. *Angew. Chem. Int. Ed.* **2022**, *61*, e202205341.
- [S4] B. Sun, T. Yoshino, S. Matsunaga, M. Kanai, *Adv. Synth. Catal.* **2014**, *356*, 1491.
- [S5] Gaussian 16, Revision C.01, M. J. Frisch, G. W. Trucks, H. B. Schlegel, G. E. Scuseria, M. A. Robb, J. R. Cheeseman, G. Scalmani, V. Barone, G. A. Petersson, H. Nakatsuji, X. Li, M. Caricato, A. V. Marenich, J. Bloino, B. G. Janesko, R. Gomperts, B. Mennucci, H. P. Hratchian, J. V. Ortiz, A. F. Izmaylov, J. L. Sonnenberg, D. Williams-Young, F. Ding, F. Lipparini, F. Egidi, J. Goings, B. Peng, A. Petrone, T. Henderson, D. Ranasinghe, V. G. Zakrzewski, J. Gao, N. Rega, G. Zheng, W. Liang, M. Hada, M. Ehara, K. Toyota, R. Fukuda, J. Hasegawa, M. Ishida, T. Nakajima, Y. Honda, O. Kitao, H. Nakai, T. Vreven, K. Throssell, J. A. Montgomery, Jr., J. E. Peralta, F. Ogliaro, M. J. Bearpark, J. J. Heyd, E. N. Brothers, K. N. Kudin, V. N. Staroverov, T. A. Keith, R. Kobayashi, J. Normand, K. Raghavachari, A. P. Rendell, J. C. Burant, S. S. Iyengar, J. Tomasi, M. Cossi, J. M. Millam, M. Klene, C. Adamo, R. Cammi, J. W. Ochterski, R. L. Martin, K. Morokuma, O. Farkas, J. B. Foresman, and D. J. Fox, Gaussian, Inc., Wallingford CT, 2016.
- [S6] F. Weigend, R. Ahlrichs, *Phys. Chem. Chem. Phys.* **2005**, *7*, 3297.
- [S7] Y. Zhao, D. G. Truhlar, *Theor. Chem. Acc.* **2008**, *120*, 215.
- [S8] A. V. Marenich, C. J. Cramer, D. G. Truhlar, *J. Phys. Chem. B* **2009**, *113*, 6378.
- [S9] Y. Zhao, D. G. Truhlar, *J. Chem. Phys.* **2006**, *125*, 194101.
- [S10] a) H. Dunning Jr., P. J. Hay, in *Modern Theoretical Chemistry*, Ed. H. F. Schaefer III, Vol. 3 (Plenum, New York, 1977) 1–28; b) P. J. Hay, W. R. Wadt, *J. Chem. Phys.* **1985**, *82*, 270; c) W. R. Wadt, P. J. Hay, *J. Chem. Phys.* **1985**, *82*, 284; d) P. J. Hay, W. R. Wadt, *J. Chem. Phys.* **1985**, *82*, 299.
- [S11] a) P. Pracht, F. Bohle, S. Grimme, *Phys. Chem. Chem. Phys.* **2020**, *22*, 7169; b) S. Grimme, *J. Chem. Theory Comput.* **2019**, *15*, 2847.
- [S12] C. Bannwarth, E. Caldeweyher, S. Ehlert, A. Hansen, P. Pracht, J. Seibert, S. Spicher, S. Grimme, *WIREs Comput. Mol. Sci.* **2020**, e01493.
- [S13] T. Lu, F. Chen, *J. Comput. Chem.* **2012**, *33*, 580.
- [S14] W. Humphrey, A. Dalke, K. Schulten, *J. Molec. Graphics* **1996**, *14*, 33.

## 5. NMR Spectra



# $^1\text{H}$ NMR (600.17 MHz, $\text{CDCl}_3$ ) spectrum of S1

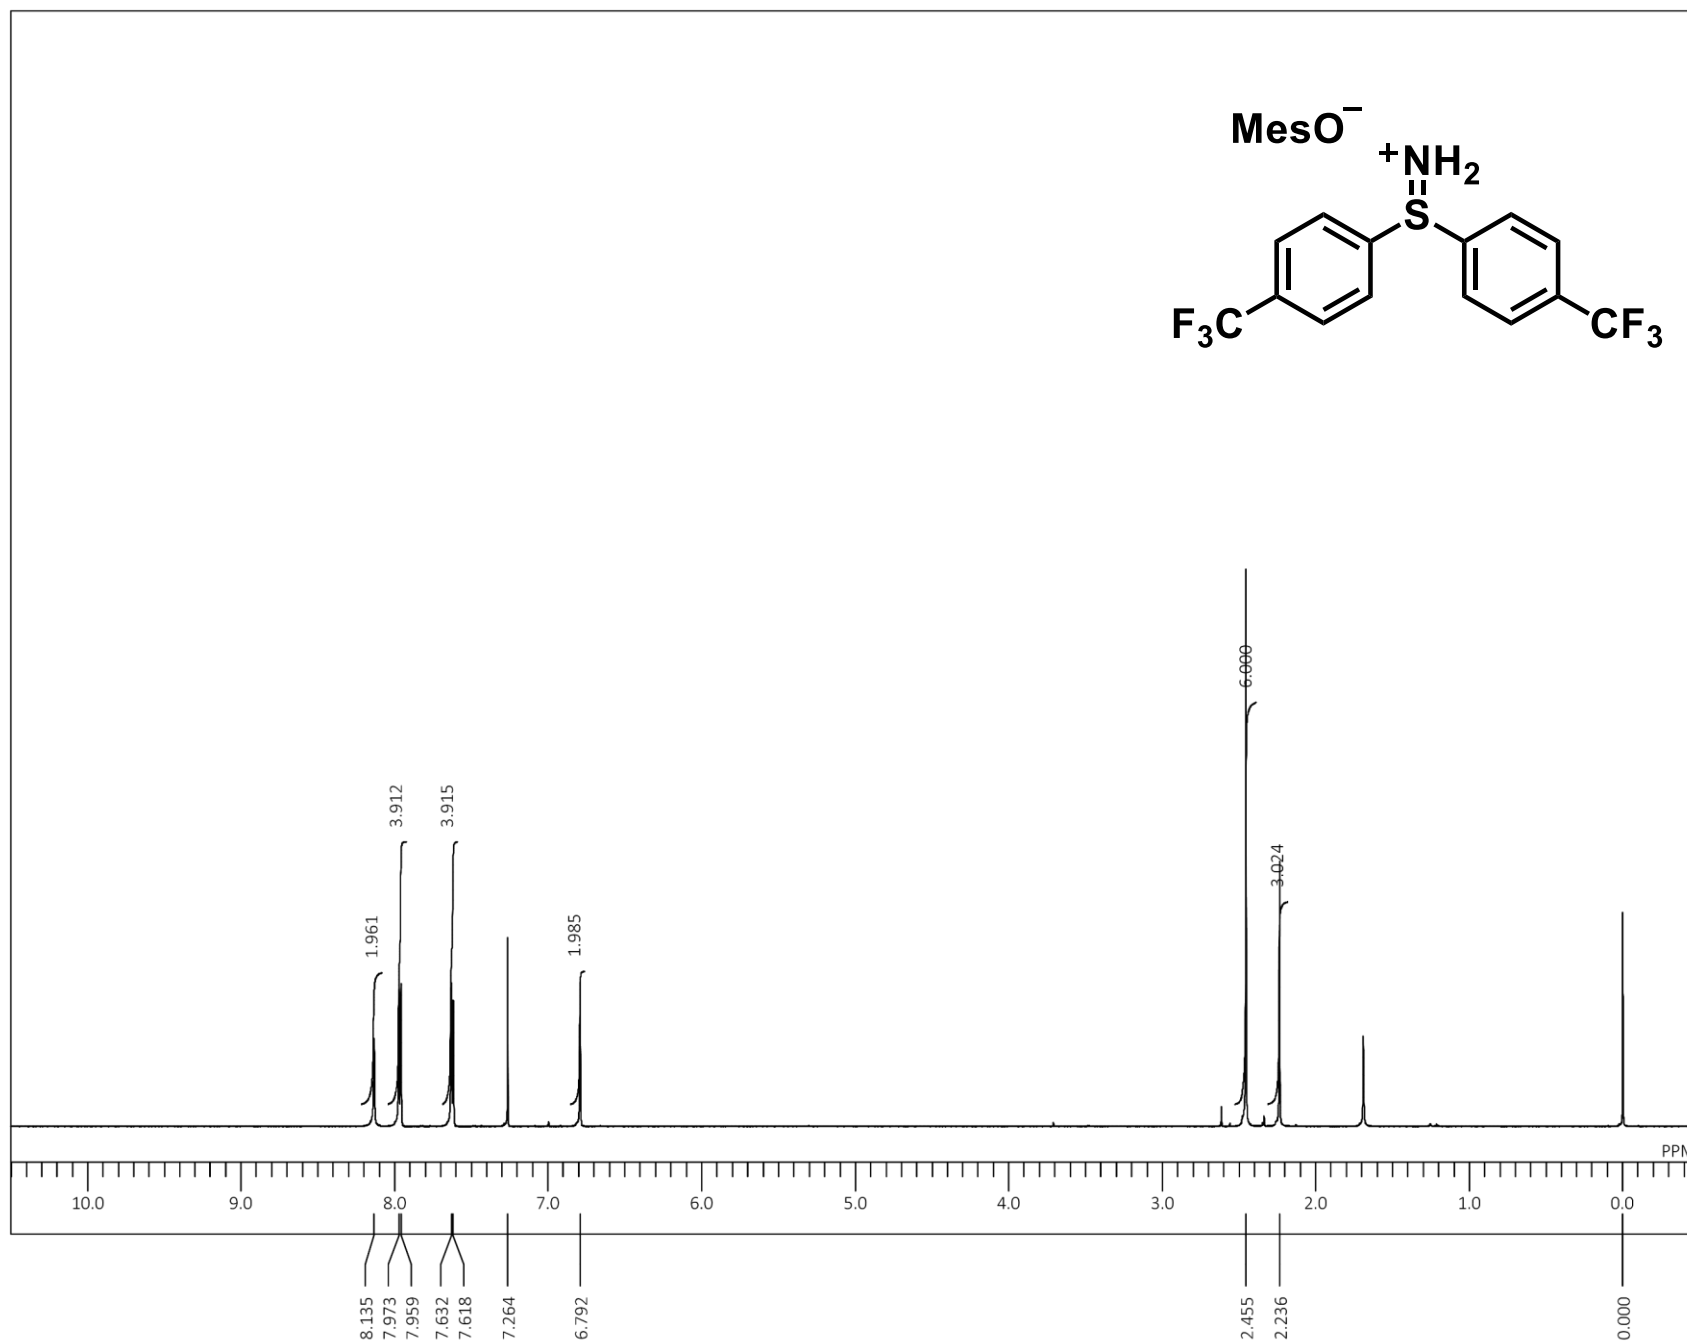

DFILE AM02196\_pCF3\_en-1.als  
COMNT AM02196\_pCF3\_en  
DATIM 2024-11-25 17:16:45  
OBNUC 1H  
EXMOD single\_pulse.ex2  
OBFRQ 600.17 MHz  
OBSET 5.30 KHz  
OBFIN 5.47 Hz  
POINT 26214  
FREQU 9008.87 Hz  
SCANS 8  
ACQTM 2.9098 sec  
PD 5.0000 sec  
PW1 7.00 usec  
IRNUC 1H  
CTEMP 18.0 c  
SLVNT CDCL3  
EXREF 0.00 ppm  
BF 0.12 Hz  
RGAIN 50

# $^{13}\text{C}\{^1\text{H}\}$ NMR (150.92 MHz, $\text{CDCl}_3$ ) spectrum of S1

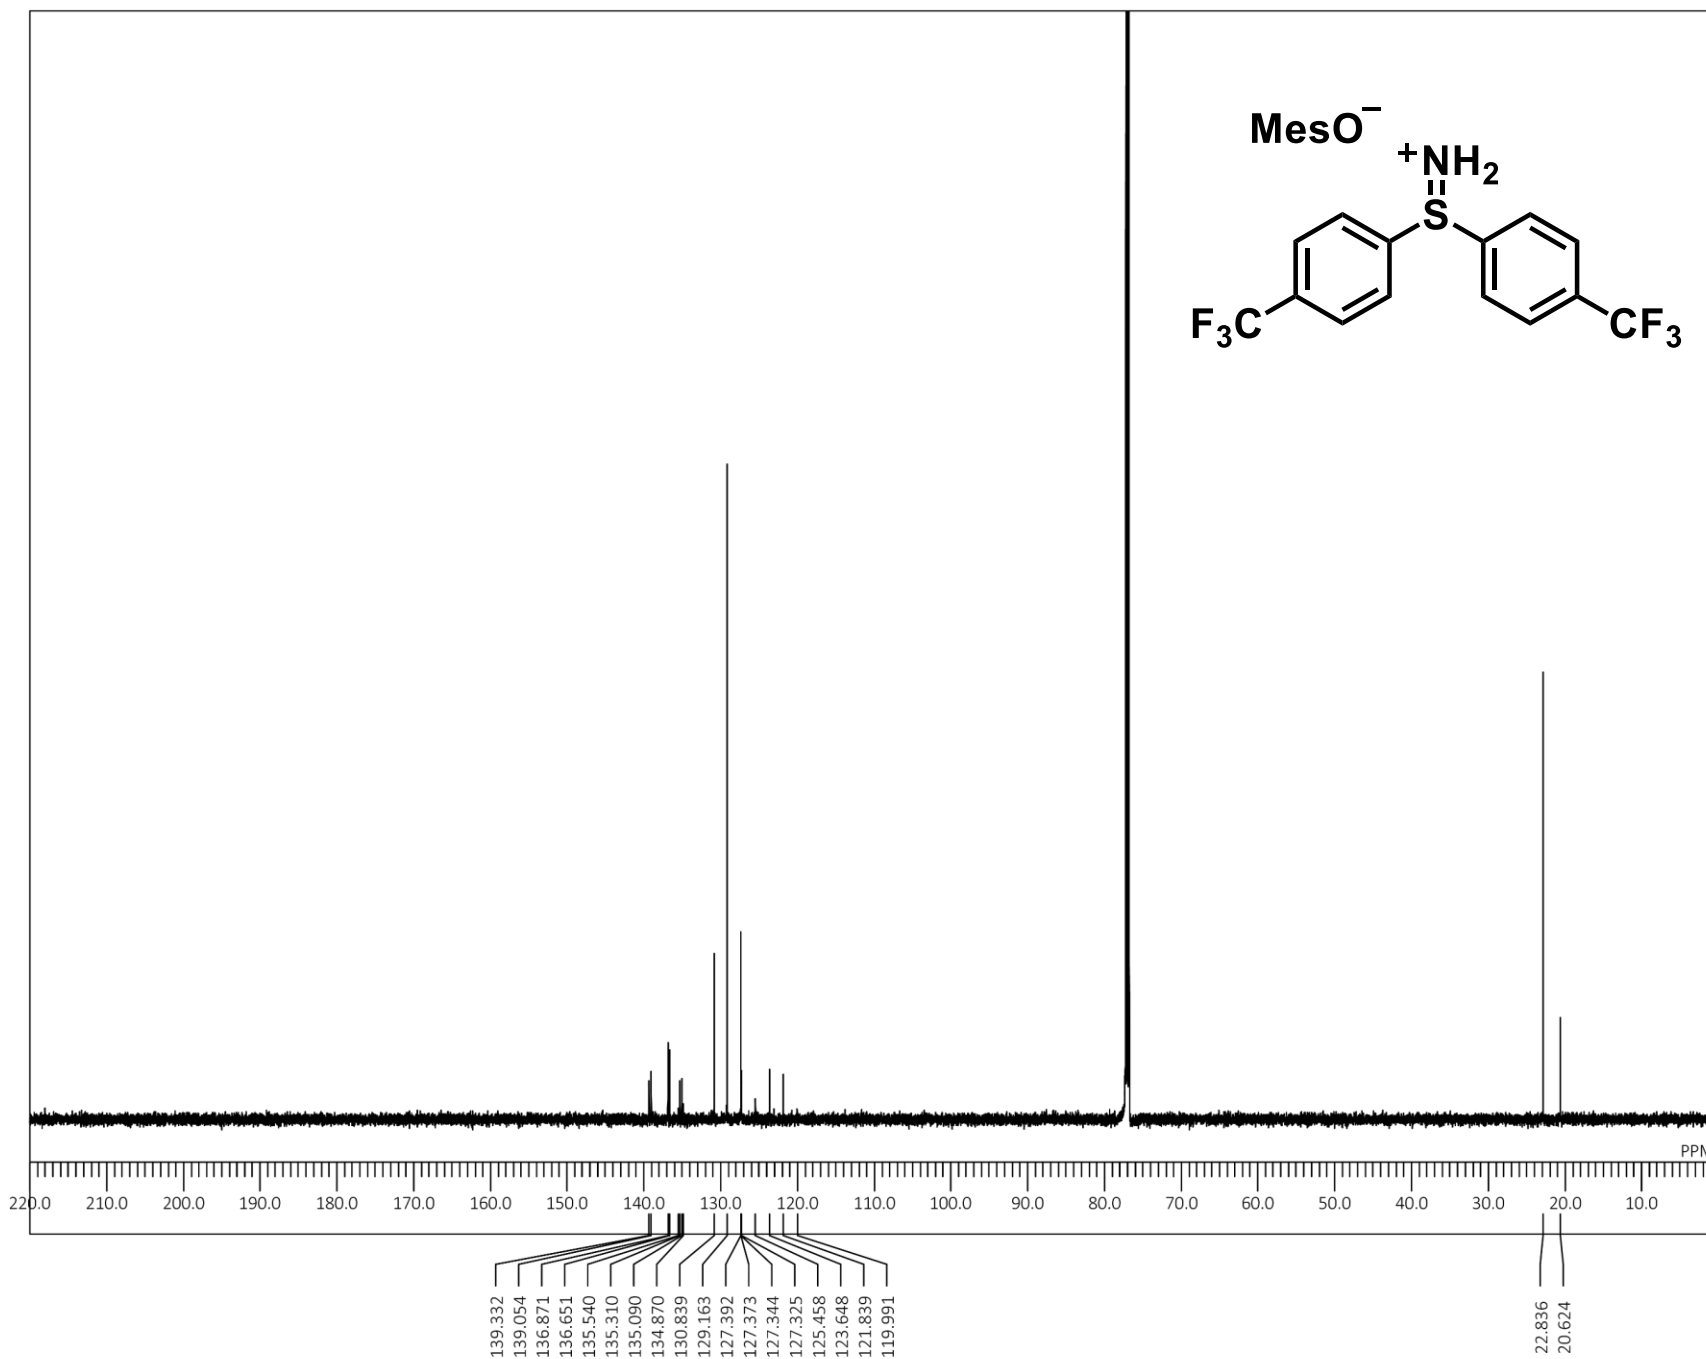

DFILE AM\_tyuukan\_sul\_pCF3\_13C-1.als  
COMNT AM\_tyuukan\_sul\_pCF3\_13C  
DATIM 2025-01-25 02:54:38  
OBNUC 13C  
EXMOD single\_pulse\_dec  
OBFRQ 150.92 MHz  
OBSET 8.52 KHz  
OBFIN 1.74 Hz  
POINT 26214  
FREQU 37878.21 Hz  
SCANS 6446  
ACQTM 0.6921 sec  
PD 2.0000 sec  
PW1 3.83 usec  
IRNUC 1H  
CTEMP 20.9 c  
SLVNT CDCL3  
EXREF 77.00 ppm  
BF 0.22 Hz  
RGAIN 60

# $^{19}\text{F}$ NMR (564.67 MHz, $\text{CDCl}_3$ ) spectrum of S1

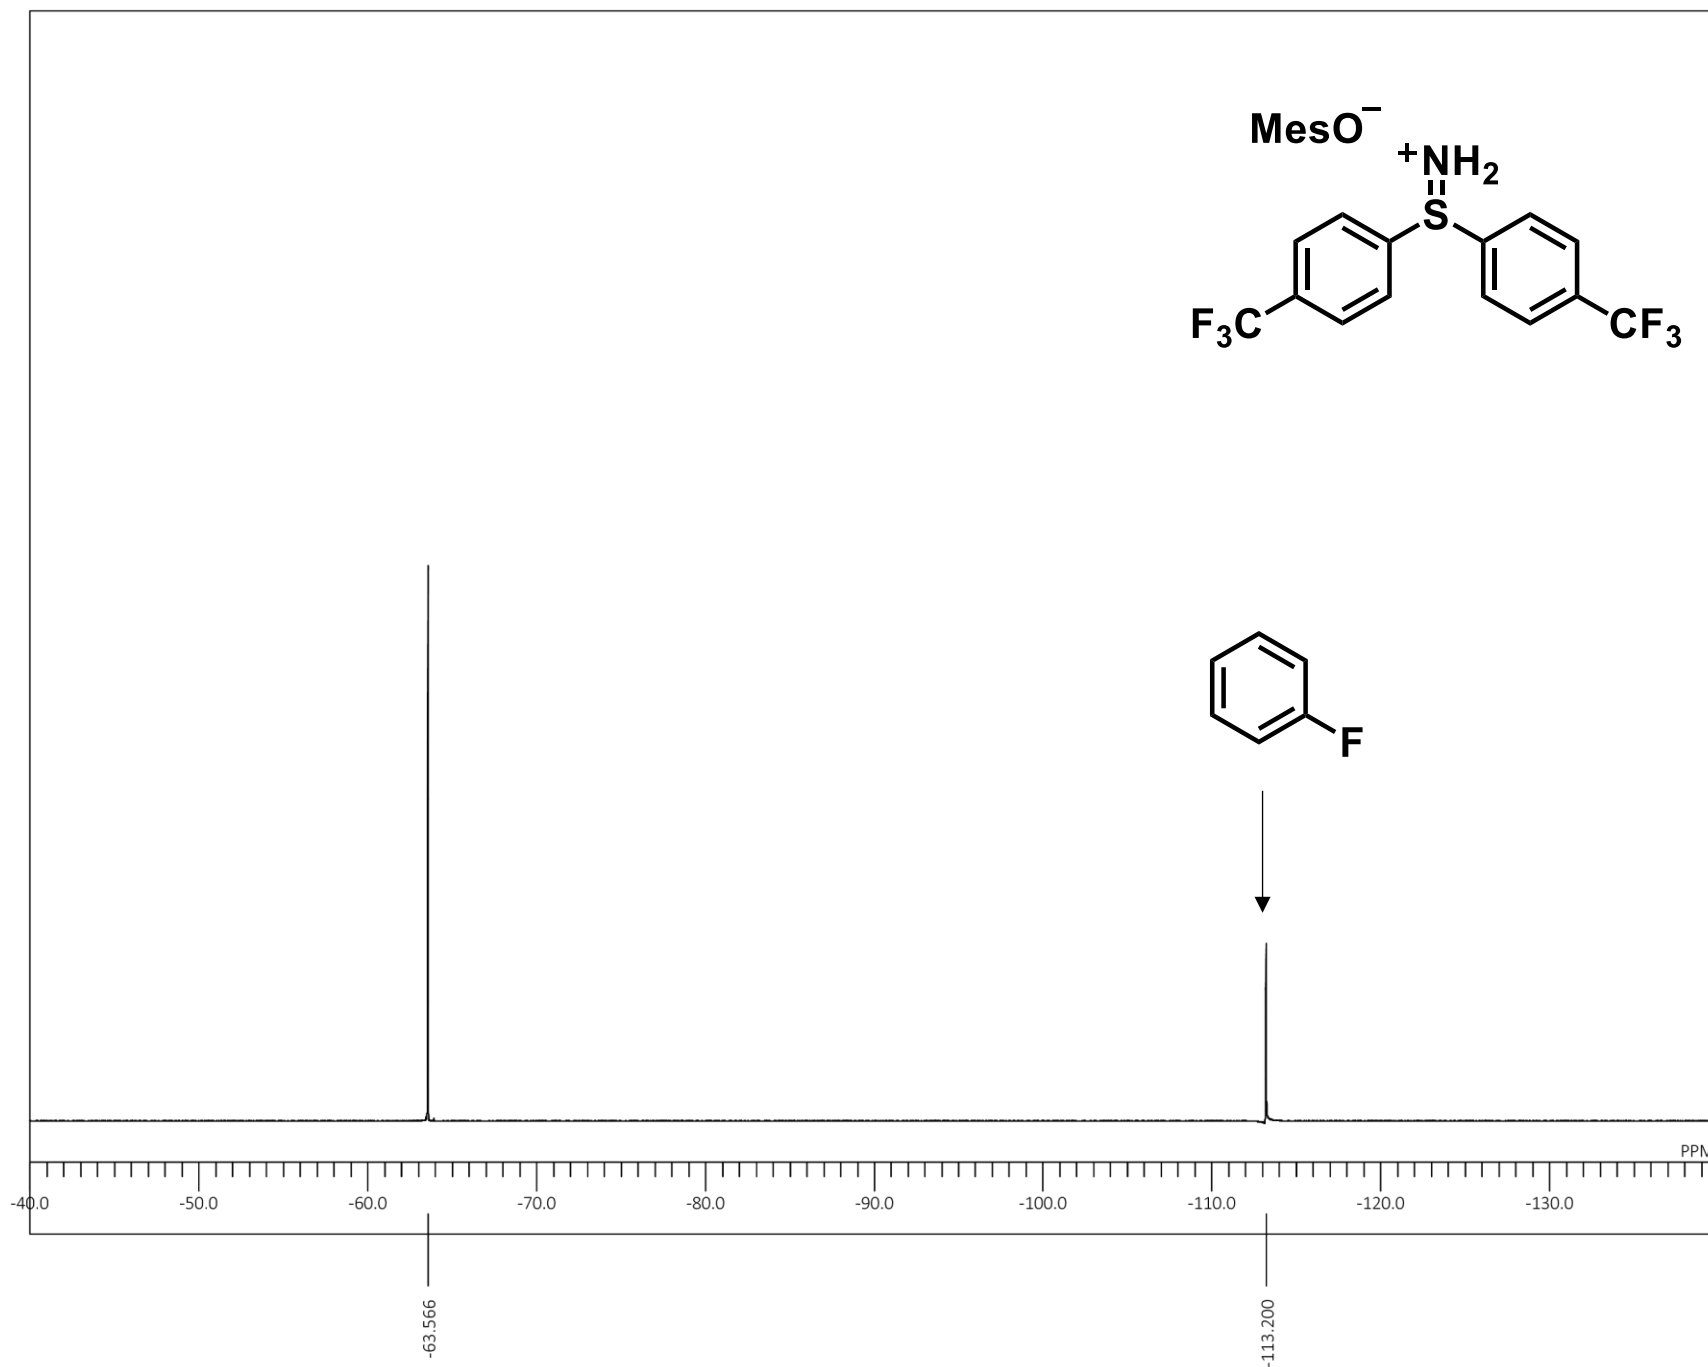

|       |                               |
|-------|-------------------------------|
| DFILE | AM_tyuukan_sul_pCF3_19F-1.als |
| COMNT | AM_tyuukan_sul_pCF3_19F       |
| DATIM | 2025-01-25 03:11:49           |
| OBNUC | 19F                           |
| EXMOD | single_pulse.ex2              |
| OBFRQ | 564.67 MHz                    |
| OBSET | 5.29 KHz                      |
| OBFIN | 1.21 Hz                       |
| POINT | 26214                         |
| FREQ  | 56817.31 Hz                   |
| SCANS | 8                             |
| ACQTM | 0.4614 sec                    |
| PD    | 10.0000 sec                   |
| PW1   | 6.65 usec                     |
| IRNUC | 19F                           |
| CTEMP | 20.1 c                        |
| SLVNT | $\text{CDCl}_3$               |
| EXREF | -113.20 ppm                   |
| BF    | 2.92 Hz                       |
| RGAIN | 52                            |

# $^1\text{H}$ NMR (600.17 MHz, $\text{CDCl}_3$ ) spectrum of 1e

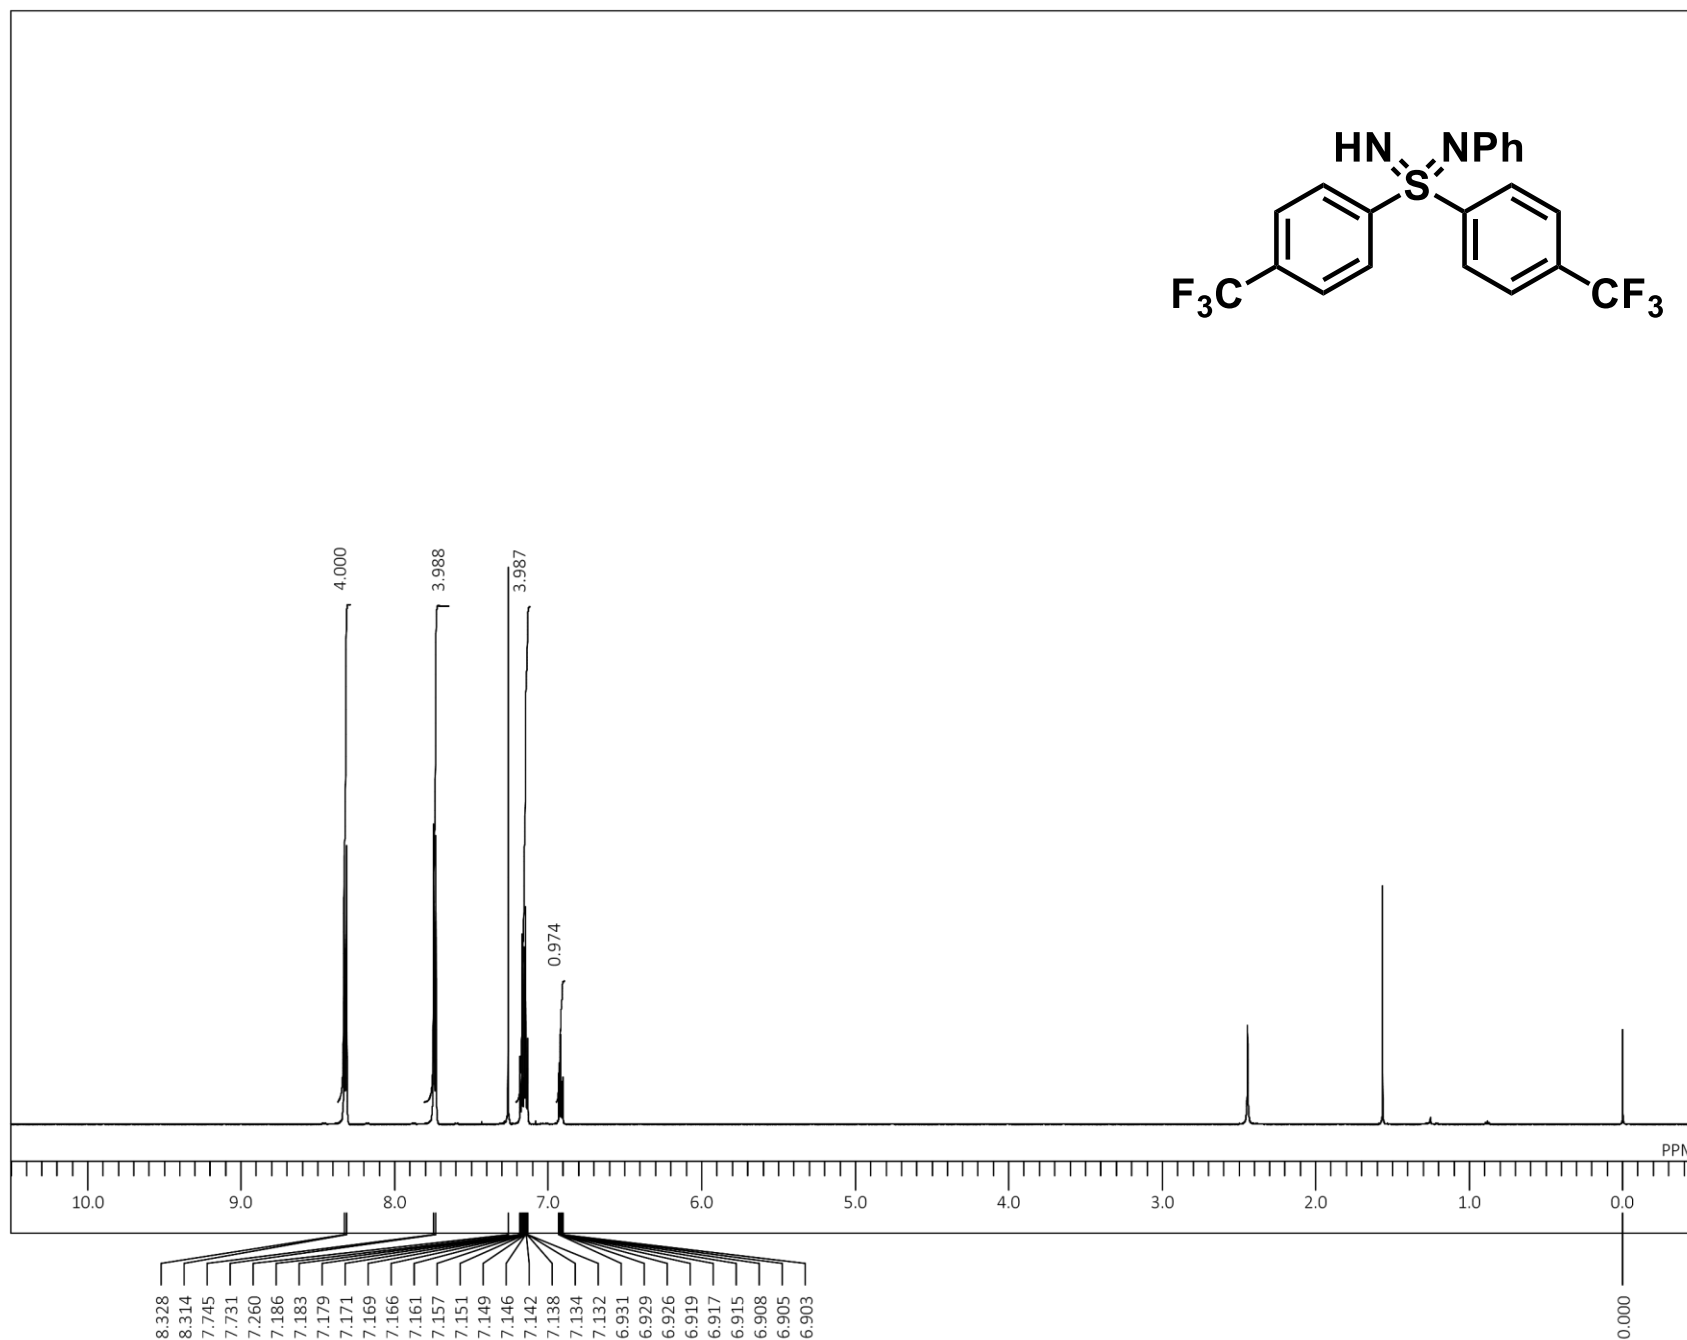

DFILE AM\_SM\_sul\_pCF3\_1H-1.als  
COMNT AM\_SM\_sul\_pCF3\_1H  
DATIM 2025-01-24 21:59:19  
OBNUC 1H  
EXMOD single\_pulse.ex2  
OBFRQ 600.17 MHz  
OBSET 5.30 KHz  
OBFIN 5.47 Hz  
POINT 26214  
FREQU 9008.87 Hz  
SCANS 8  
ACQTM 2.9098 sec  
PD 10.0000 sec  
PW1 7.00 usec  
IRNUC 1H  
CTEMP 20.3 c  
SLVNT  $\text{CDCl}_3$   
EXREF 0.00 ppm  
BF 0.12 Hz  
RGAIN 50

# $^{13}\text{C}\{^1\text{H}\}$ NMR (150.92 MHz, $\text{CDCl}_3$ ) spectrum of 1e

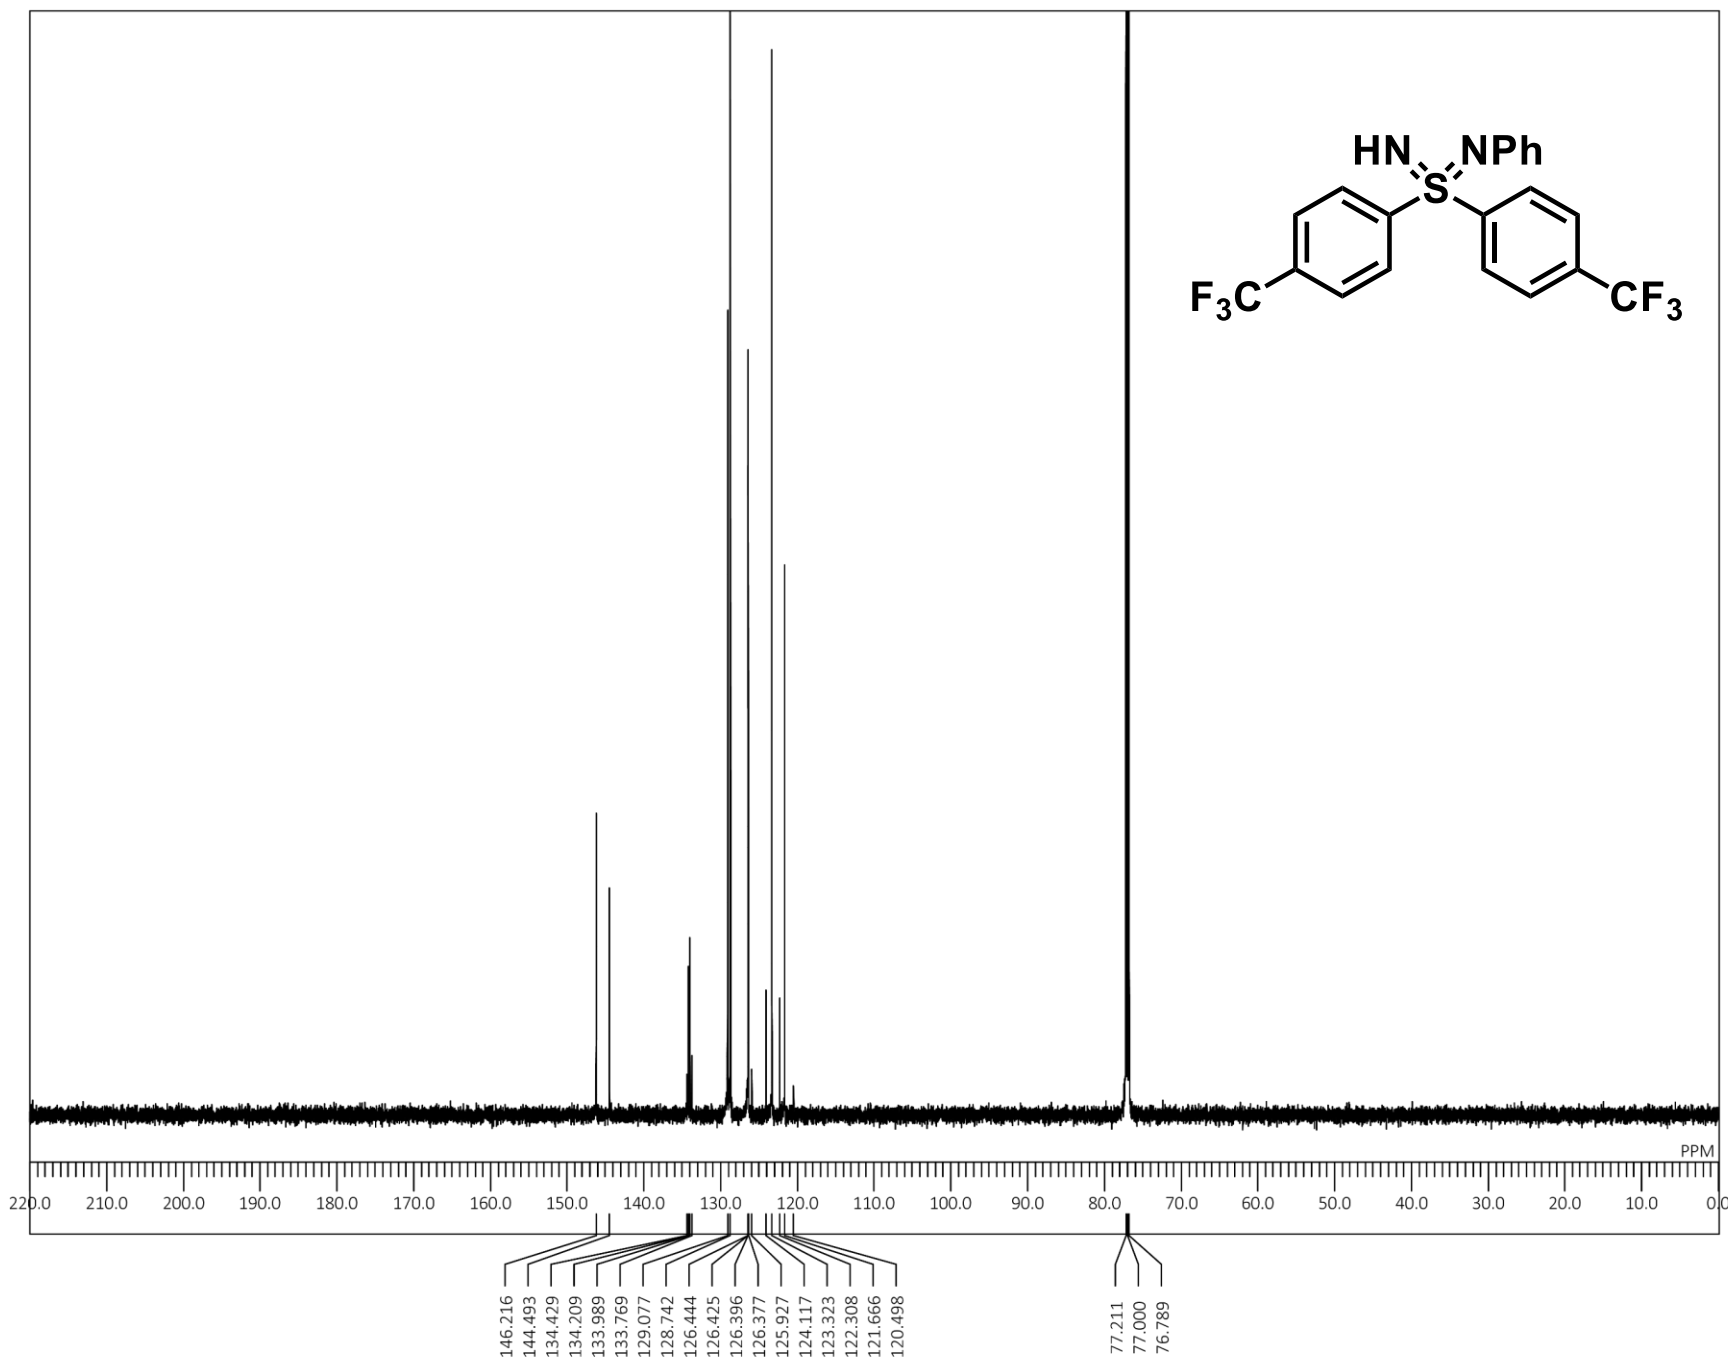

DFILE AM\_SM\_sul\_pCF3\_13C-1.als  
COMNT AM\_SM\_sul\_pCF3\_13C  
DATIM 2025-01-25 04:29:02  
OBNUC 13C  
EXMOD single\_pulse\_dec  
OBFRQ 150.92 MHz  
OBSET 8.52 KHz  
OBFIN 1.74 Hz  
POINT 26214  
FREQU 37878.21 Hz  
SCANS 1449  
ACQTM 0.6921 sec  
PD 2.0000 sec  
PW1 3.83 usec  
IRNUC 1H  
CTEMP 20.8 c  
SLVNT CDCL3  
EXREF 77.00 ppm  
BF 0.22 Hz  
RGAIN 60

# $^{19}\text{F}$ NMR (564.67 MHz, $\text{CDCl}_3$ ) spectrum of 1e

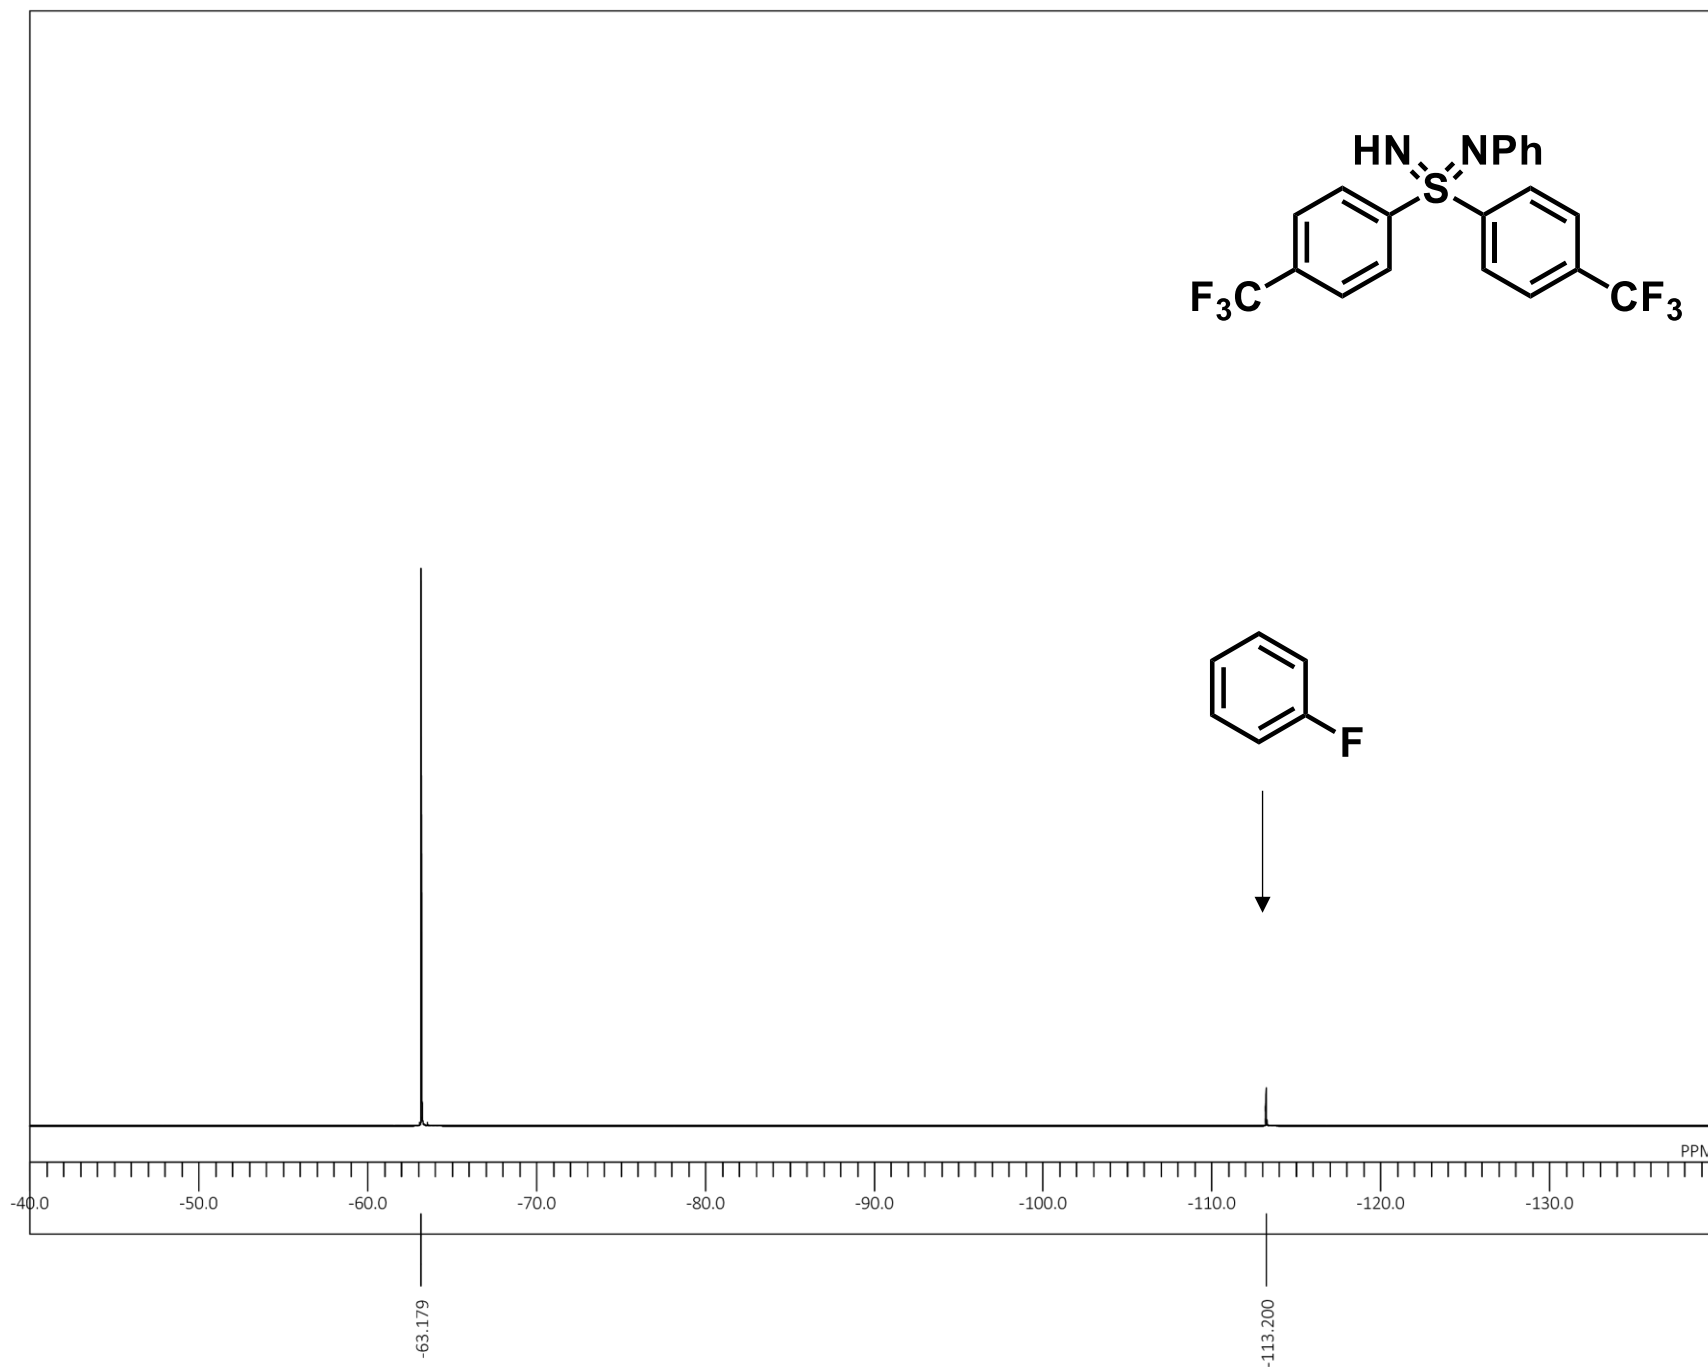

DFILE AM\_SM\_sul\_pCF3\_19F-1.als  
COMNT AM\_SM\_sul\_PCF3\_19F  
DATIM 2025-01-25 04:36:29  
OBNUC 19F  
EXMOD single\_pulse.ex2  
OBFRQ 564.67 MHz  
OBSET 5.29 KHz  
OBFIN 1.21 Hz  
POINT 26214  
FREQU 56817.31 Hz  
SCANS 8  
ACQTM 0.4614 sec  
PD 10.0000 sec  
PW1 6.65 usec  
IRNUC 19F  
CTEMP 20.1 c  
SLVNT CDCL3  
EXREF -113.20 ppm  
BF 0.22 Hz  
RGAIN 48

# $^1\text{H}$ NMR (600.17 MHz, $\text{CDCl}_3$ ) spectrum of 3aa

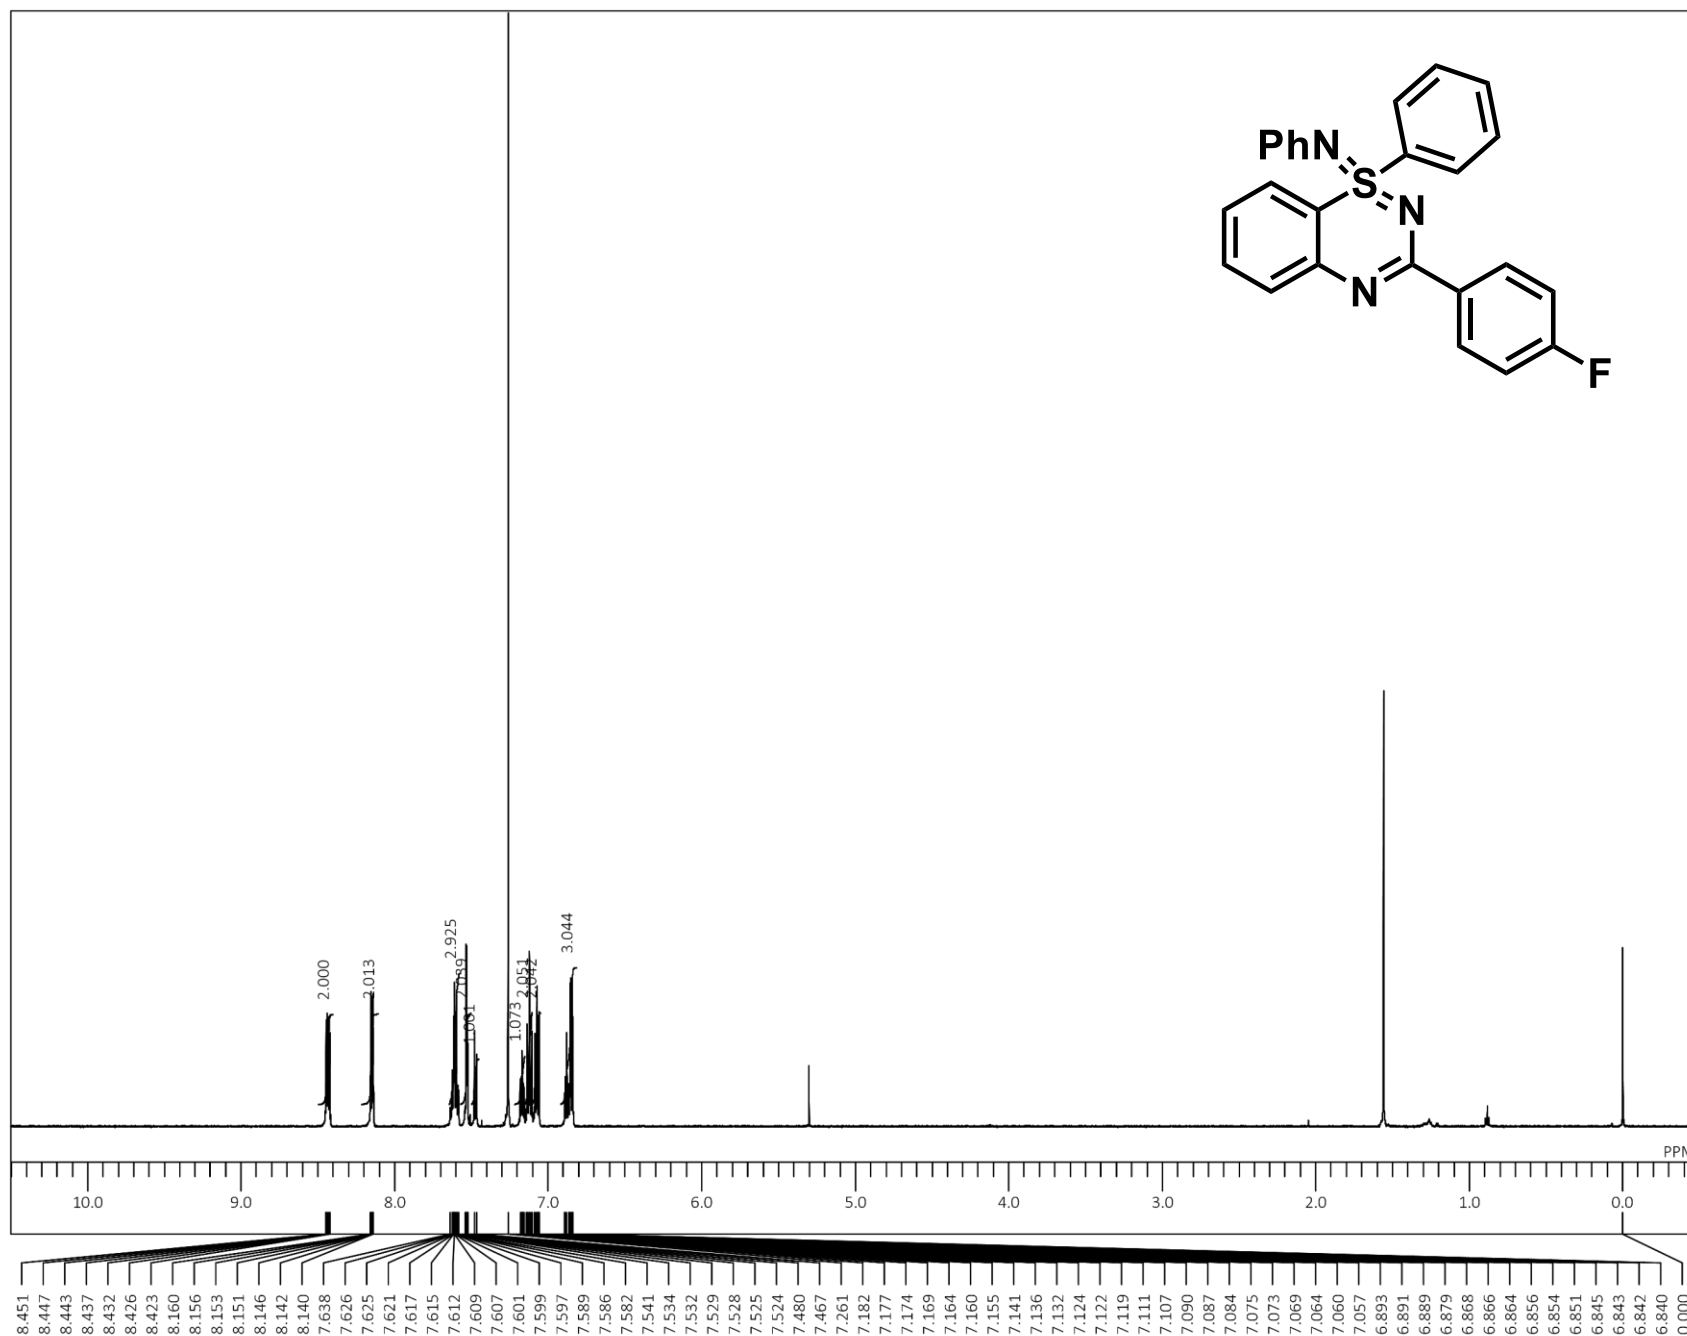

DFILE AM\_dio\_pF\_1H\_2-1.als  
COMNT AM\_dio\_pF\_1H\_2  
DATIM 2025-01-24 21:39:29  
OBNUC 1H  
EXMOD single\_pulse.ex2  
OBFRQ 600.17 MHz  
OBSET 5.30 KHz  
OBFIN 5.47 Hz  
POINT 26214  
FREQU 9008.87 Hz  
SCANS 8  
ACQTM 2.9098 sec  
PD 10.0000 sec  
PW1 7.00 usec  
IRNUC 1H  
CTEMP 20.3 c  
SLVNT CDCL3  
EXREF 0.00 ppm  
BF 0.12 Hz  
RGAIN 52

# $^{13}\text{C}\{^1\text{H}\}$ NMR (150.92 MHz, $\text{CDCl}_3$ ) spectrum of 3aa

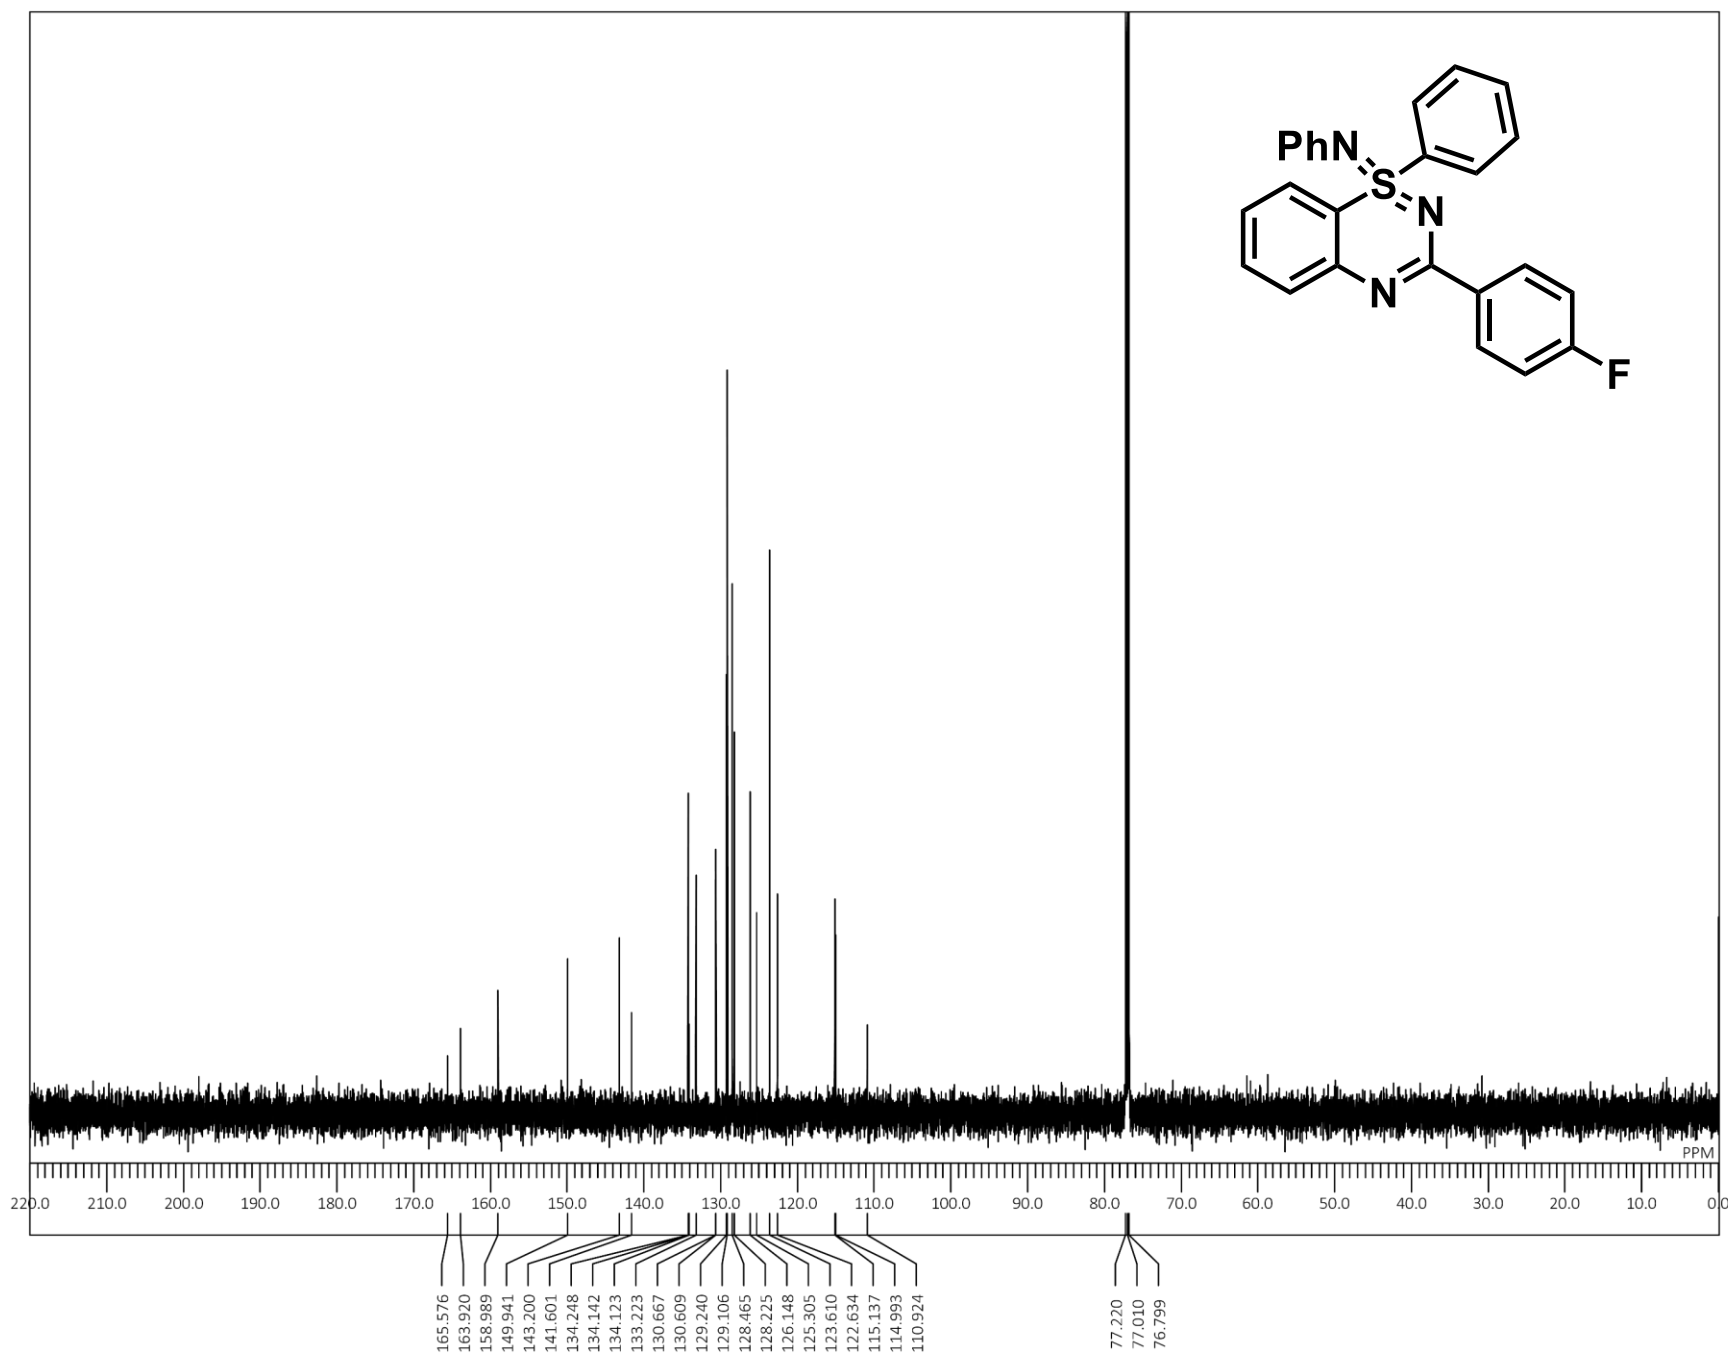

DFILE AM03023\_dio\_pF\_13C-1.als  
COMNT AM03023\_dio\_pF\_13C  
DATIM 2024-12-28 18:44:36  
OBNUC 13C  
EXMOD single\_pulse\_dec  
OBFRQ 150.92 MHz  
OBSET 8.52 KHz  
OBFIN 1.74 Hz  
POINT 26214  
FREQU 37878.21 Hz  
SCANS 992  
ACQTM 0.6921 sec  
PD 2.0000 sec  
PW1 3.83 usec  
IRNUC 1H  
CTEMP 19.7 c  
SLVNT CDCL3  
EXREF 0.00 ppm  
BF 0.12 Hz  
RGAIN 60



# $^{19}\text{F}$ NMR (564.67 MHz, $\text{CDCl}_3$ ) spectrum of 3aa

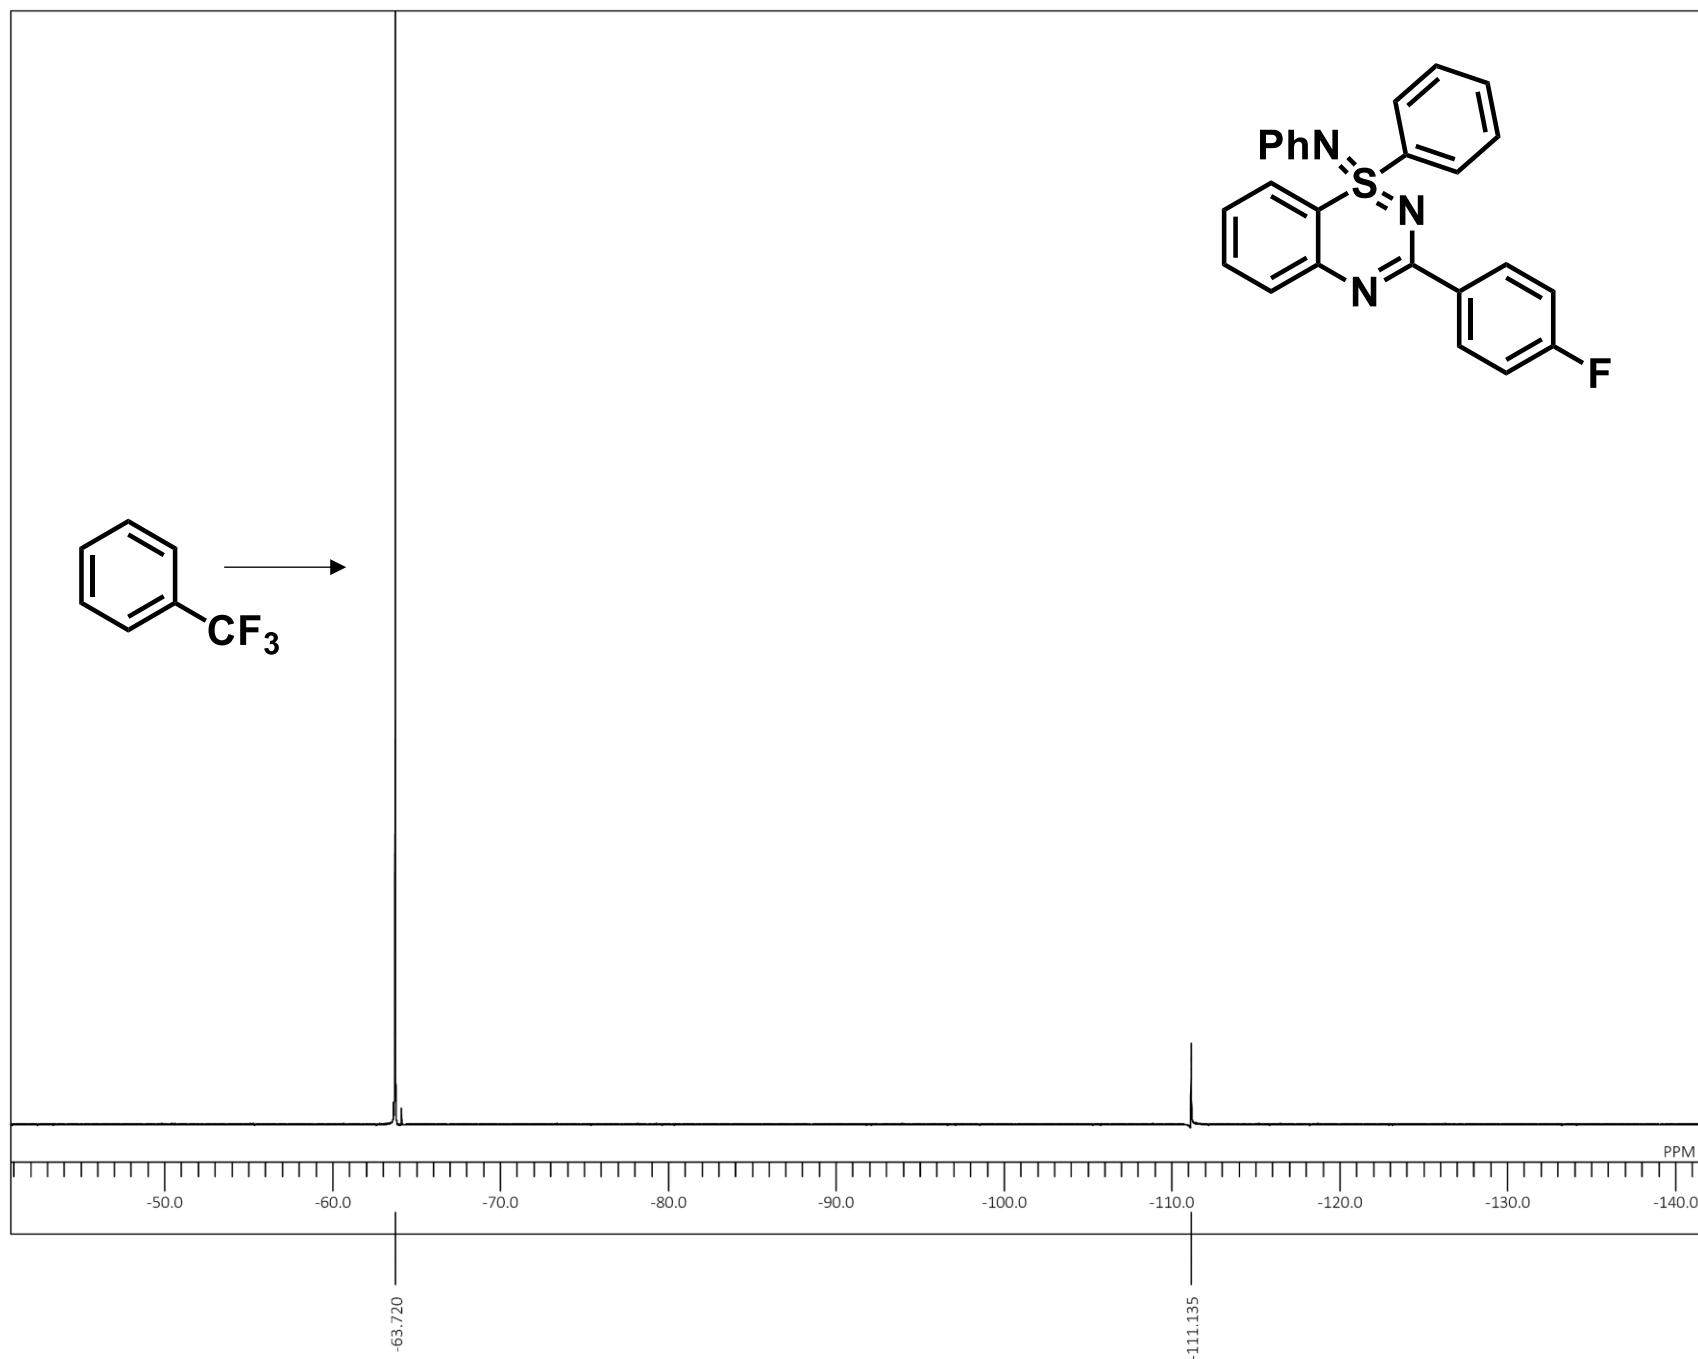

DFILE AM\_dio\_pF\_19F-1.als  
COMNT AM\_dio\_pF\_19F  
DATIM 2025-01-25 03:05:44  
OBNUC 19F  
EXMOD single\_pulse.ex2  
OBFRQ 564.67 MHz  
OBSET 5.29 KHz  
OBFIN 1.21 Hz  
POINT 26214  
FREQU 56817.31 Hz  
SCANS 8  
ACQTM 0.4614 sec  
PD 10.0000 sec  
PW1 6.65 usec  
IRNUC 19F  
CTEMP 20.0 c  
SLVNT  $\text{CDCl}_3$   
EXREF -63.72 ppm  
BF 2.92 Hz  
RGAIN 50

# $^1\text{H}$ NMR (600.17 MHz, $\text{CDCl}_3$ ) spectrum of 3ab

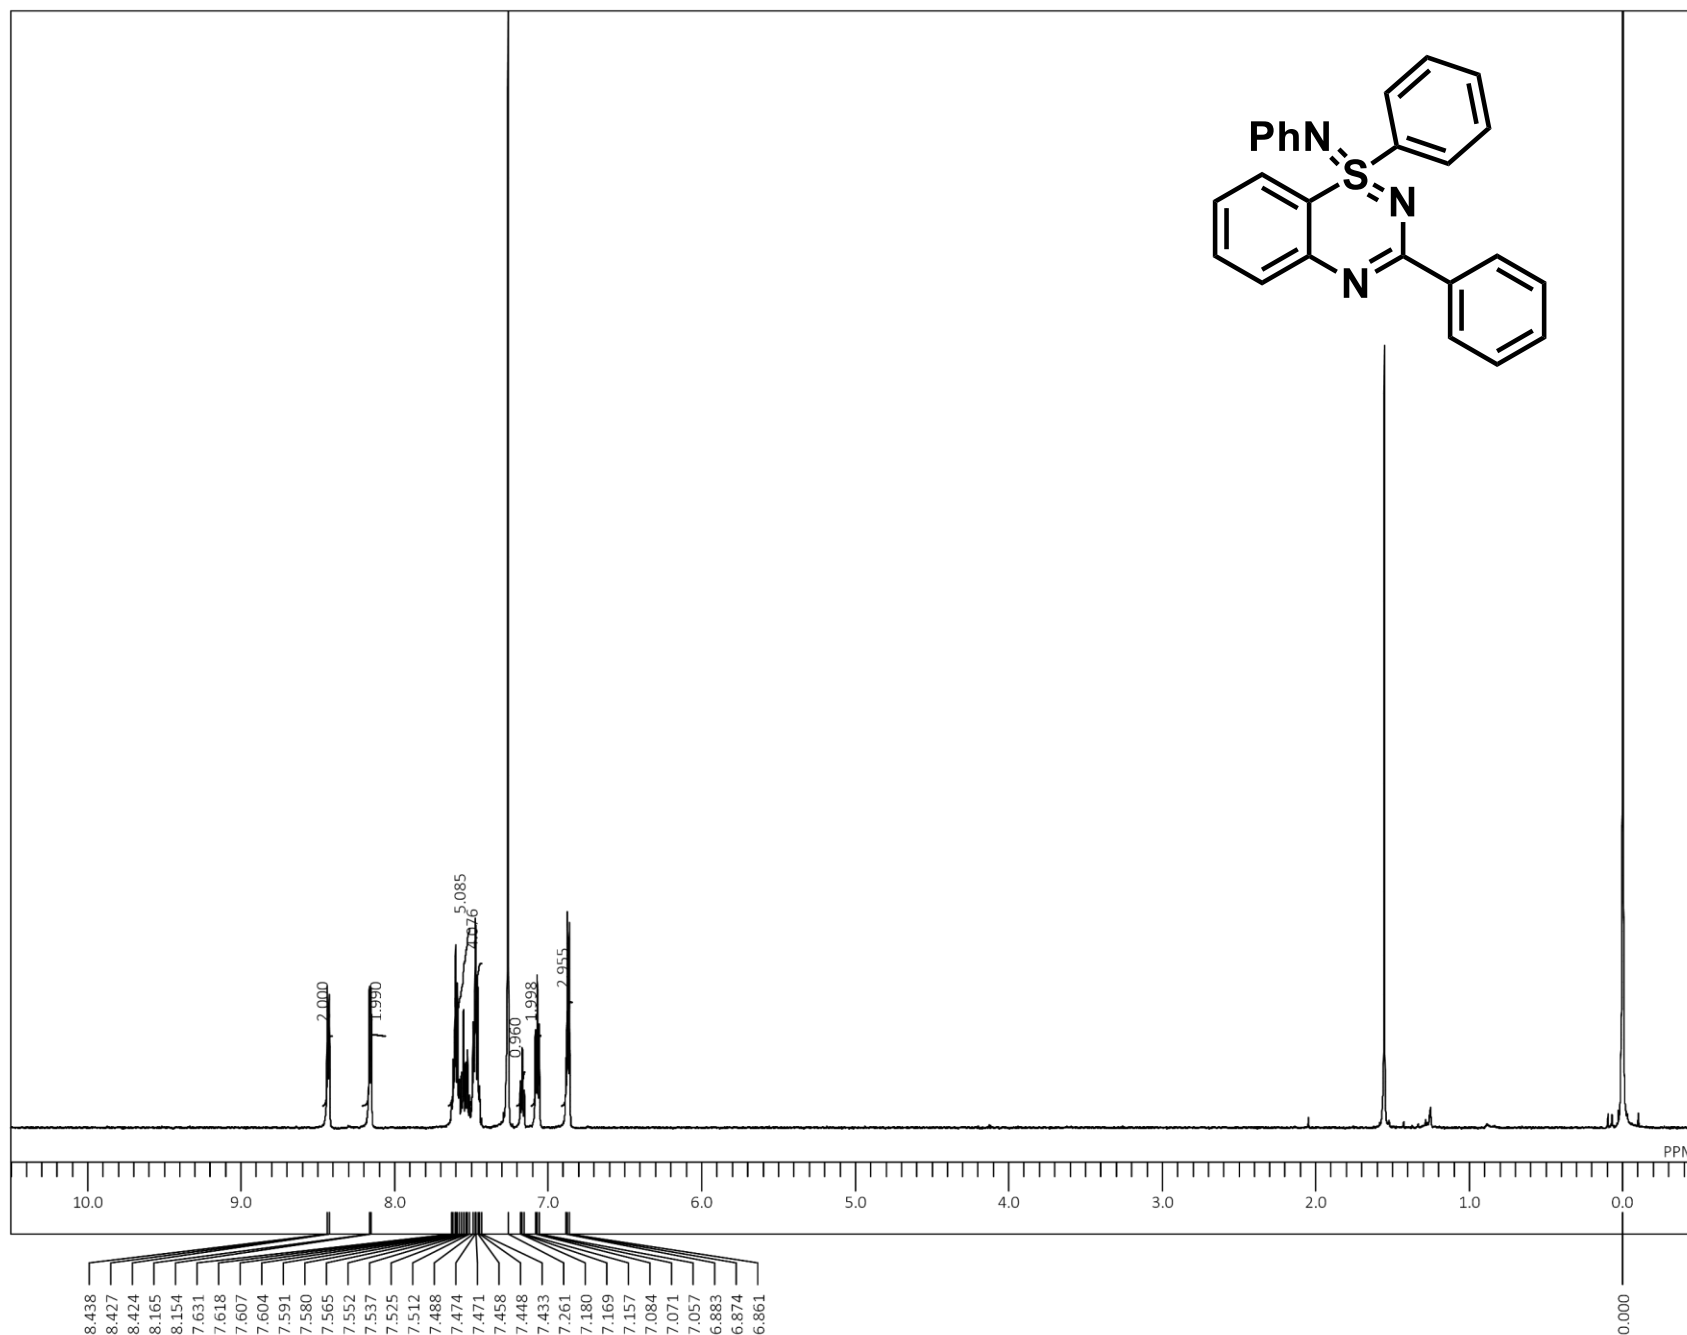

DFILE AM\_dio\_pH\_1H-2.als  
COMNT AM\_dio\_pH\_1H  
DATIM 2025-01-22 00:24:30  
OBNUC 1H  
EXMOD single\_pulse.ex2  
OBFRQ 600.17 MHz  
OBSET 5.30 KHz  
OBFIN 5.47 Hz  
POINT 26214  
FREQU 9008.87 Hz  
SCANS 8  
ACQTM 2.9098 sec  
PD 10.0000 sec  
PW1 7.00 usec  
IRNUC 1H  
CTEMP 19.6 c  
SLVNT  $\text{CDCl}_3$   
EXREF 0.00 ppm  
BF 1.02 Hz  
RGAIN 52

# $^{13}\text{C}\{^1\text{H}\}$ NMR (150.92 MHz, $\text{CDCl}_3$ ) spectrum of 3ab

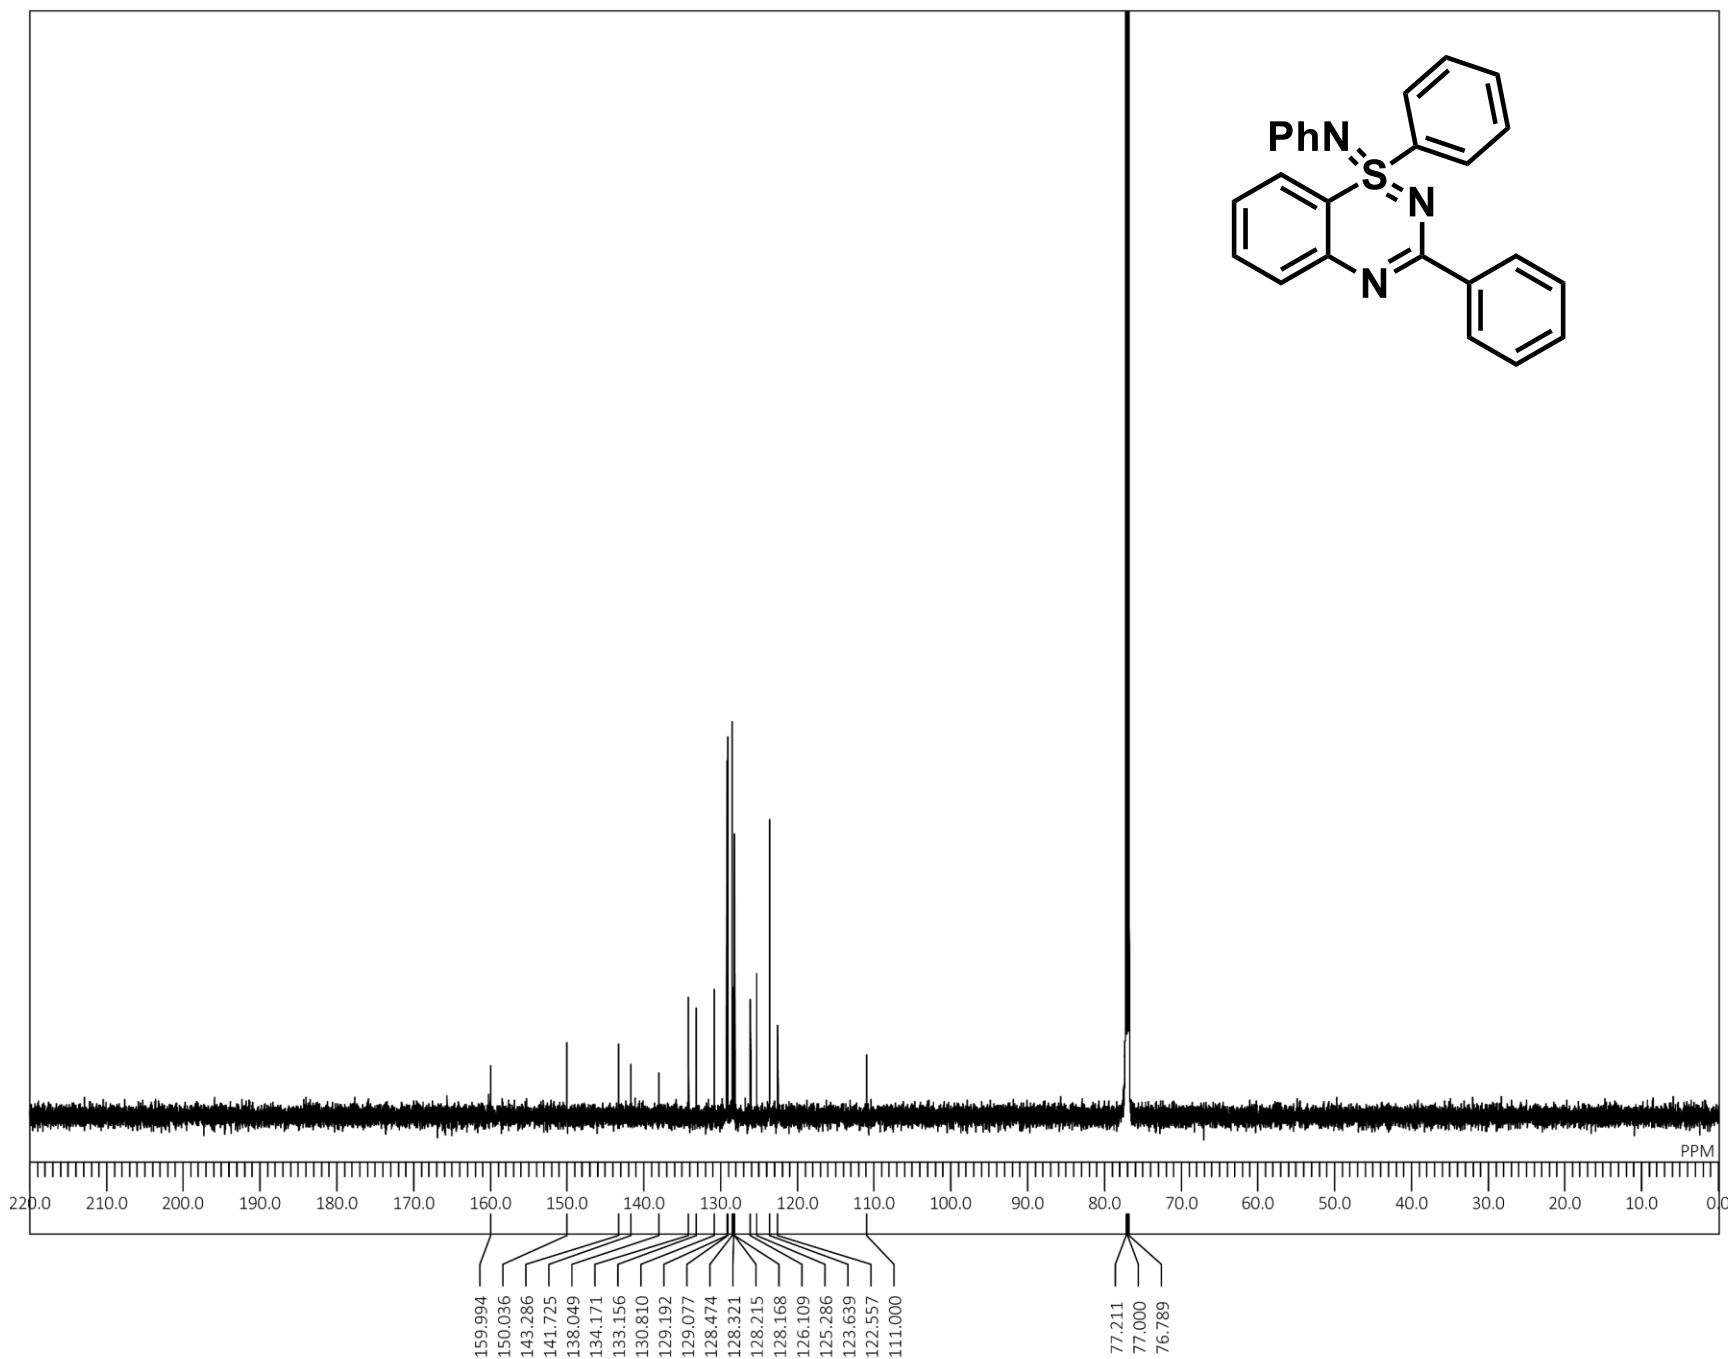

DFILE AM03023\_dio\_mutikan\_13C\_2-1  
COMNT AM03023\_dio\_mutikan\_13C\_2  
DATIM 2024-12-28 22:10:36  
OBNUC 13C  
EXMOD single\_pulse\_dec  
OBFRQ 150.92 MHz  
OBSET 8.52 KHz  
OBFIN 1.74 Hz  
POINT 26214  
FREQU 37878.21 Hz  
SCANS 3000  
ACQTM 0.6921 sec  
PD 2.0000 sec  
PW1 3.83 usec  
IRNUC 1H  
CTEMP 19.5 c  
SLVNT CDCL3  
EXREF 77.00 ppm  
BF 0.12 Hz  
RGAIN 60

# $^1\text{H}$ NMR (600.17 MHz, $\text{CDCl}_3$ ) spectrum of 3ac

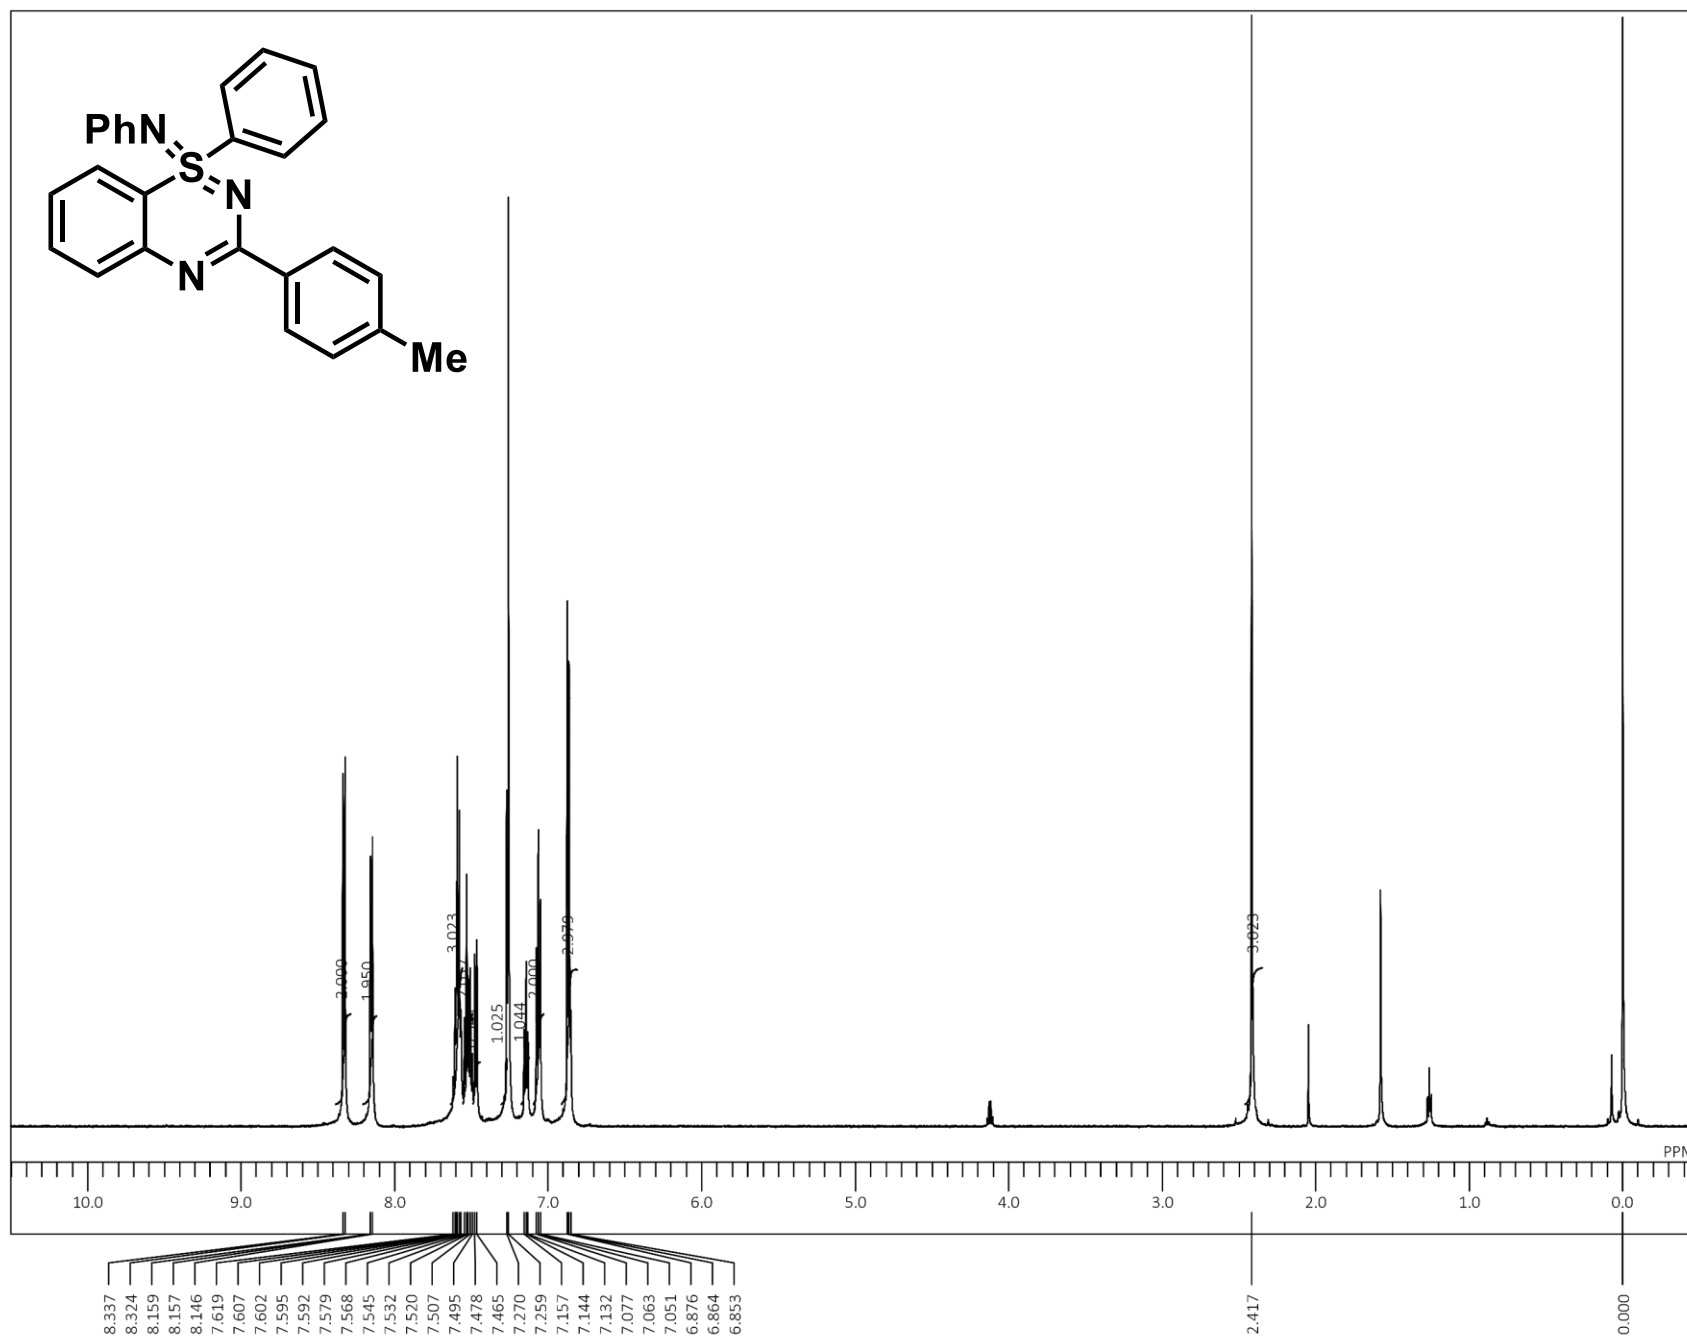

DFILE AM\_dio\_pMe\_1H-1.als  
COMNT AM\_dio\_pMe\_1H  
DATIM 2025-01-22 02:55:56  
OBNUC 1H  
EXMOD single\_pulse.ex2  
OBFRQ 600.17 MHz  
OBSET 5.30 KHz  
OBFIN 5.47 Hz  
POINT 52428  
FREQU 9008.87 Hz  
SCANS 8  
ACQTM 2.9098 sec  
PD 10.0000 sec  
PW1 7.00 usec  
IRNUC 1H  
CTEMP 19.3 c  
SLVNT CDCL3  
EXREF 0.00 ppm  
BF 0.52 Hz  
RGAIN 50

# $^{13}\text{C}\{^1\text{H}\}$ NMR (150.92 MHz, $\text{CDCl}_3$ ) spectrum of 3ac

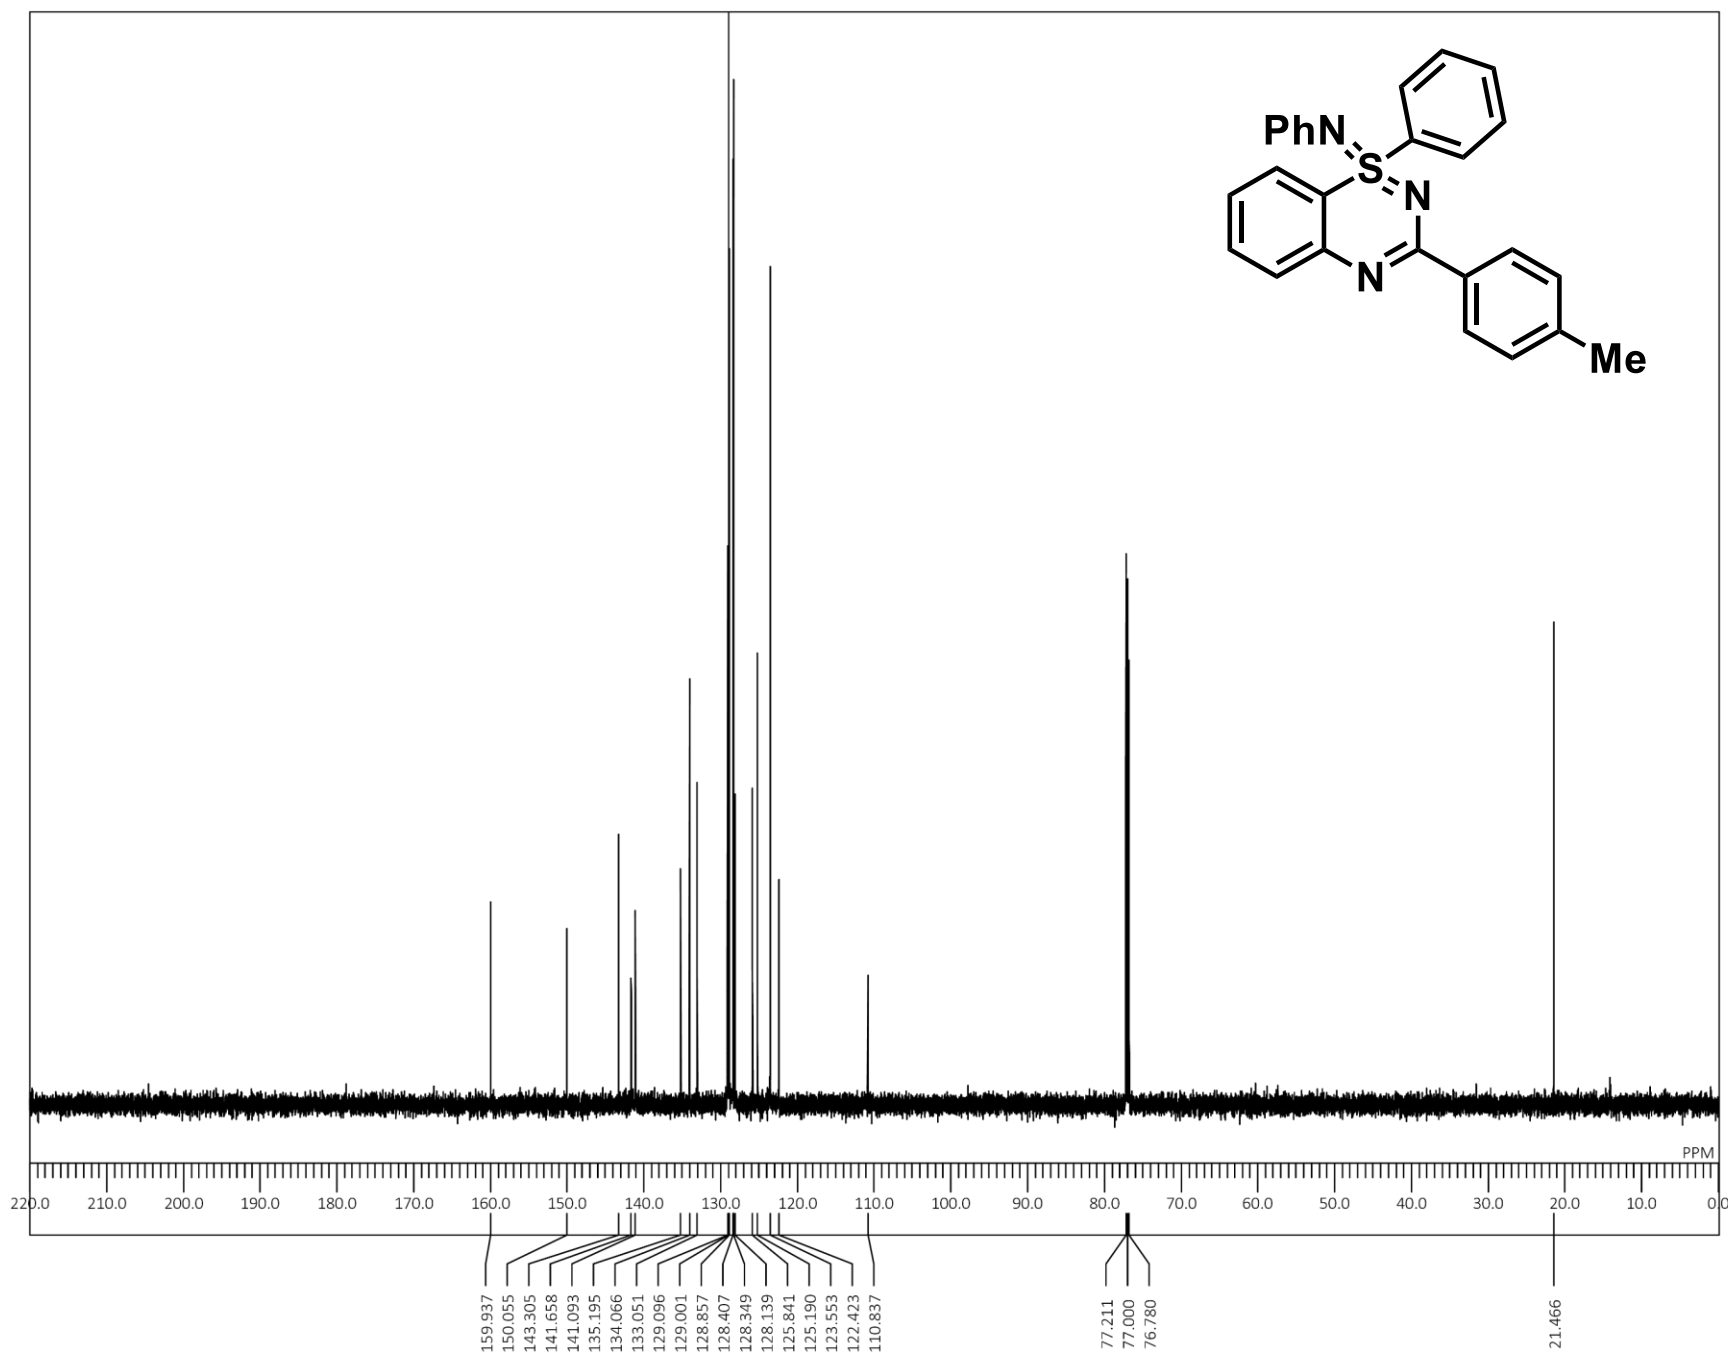

DFILE AM03007\_dio\_pMe\_13C-1.als  
COMNT AM03009\_diox\_pMe\_13C  
DATIM 2024-12-18 22:42:33  
OBNUC 13C  
EXMOD single\_pulse\_dec  
OBFRQ 150.92 MHz  
OBSET 8.52 KHz  
OBFIN 1.74 Hz  
POINT 26214  
FREQU 37878.21 Hz  
SCANS 69  
ACQTM 0.6921 sec  
PD 2.0000 sec  
PW1 3.83 usec  
IRNUC 1H  
CTEMP 17.4 c  
SLVNT CDCL3  
EXREF 77.00 ppm  
BF 0.20 Hz  
RGAIN 60

# <sup>1</sup>H NMR (600.17 MHz, CDCl<sub>3</sub>) spectrum of 3ad

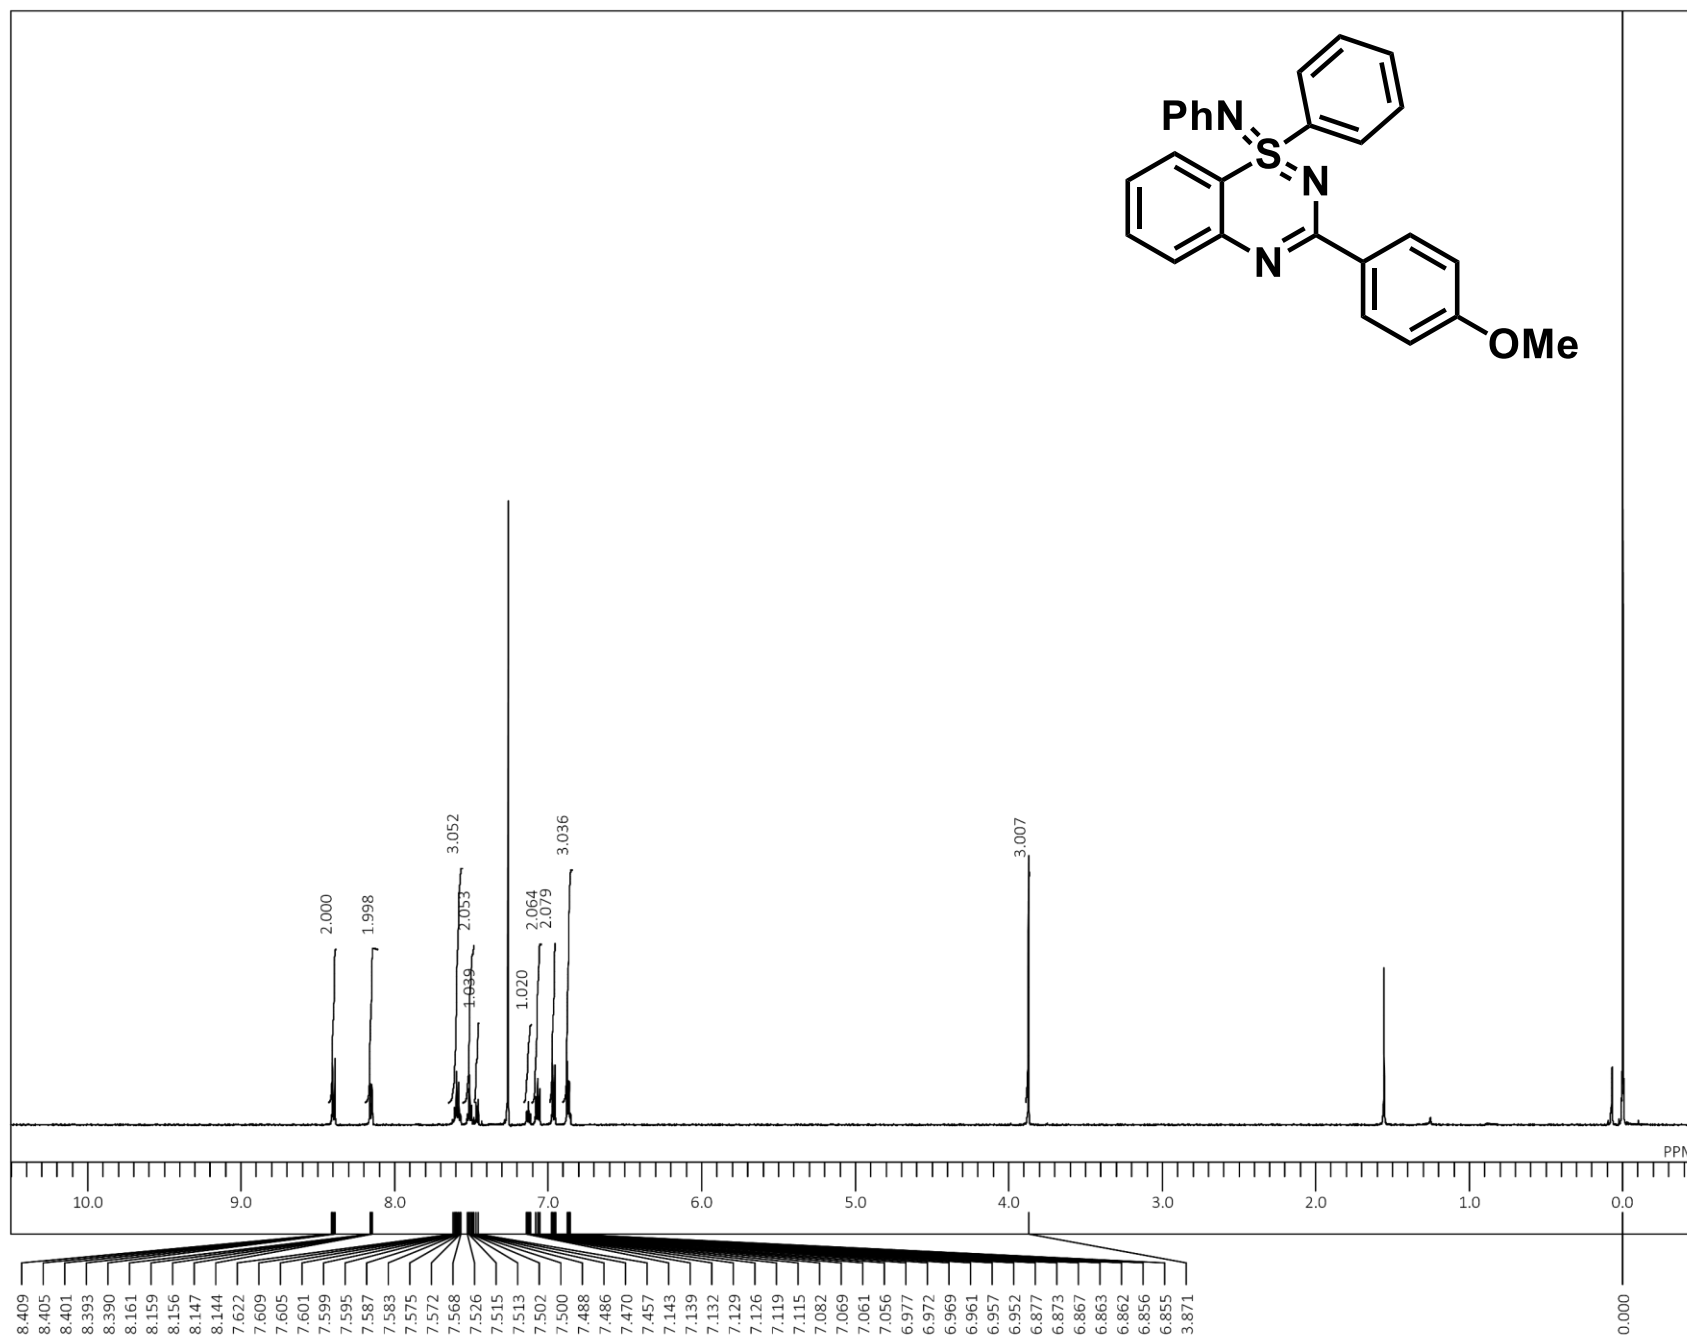

DFILE AM\_dio\_pOMe\_1H-1.als  
COMNT AM\_dio\_pOMe\_1H  
DATIM 2025-01-22 00:32:11  
OBNUC 1H  
EXMOD single\_pulse.ex2  
OBFRQ 600.17 MHz  
OBSET 5.30 KHz  
OBFIN 5.47 Hz  
POINT 26214  
FREQU 9008.87 Hz  
SCANS 8  
ACQTM 2.9098 sec  
PD 10.0000 sec  
PW1 7.00 usec  
IRNUC 1H  
CTEMP 19.6 c  
SLVNT CDCL3  
EXREF 0.00 ppm  
BF 0.12 Hz  
RGAIN 52

# $^{13}\text{C}\{^1\text{H}\}$ NMR (150.92 MHz, $\text{CDCl}_3$ ) spectrum of 3ad

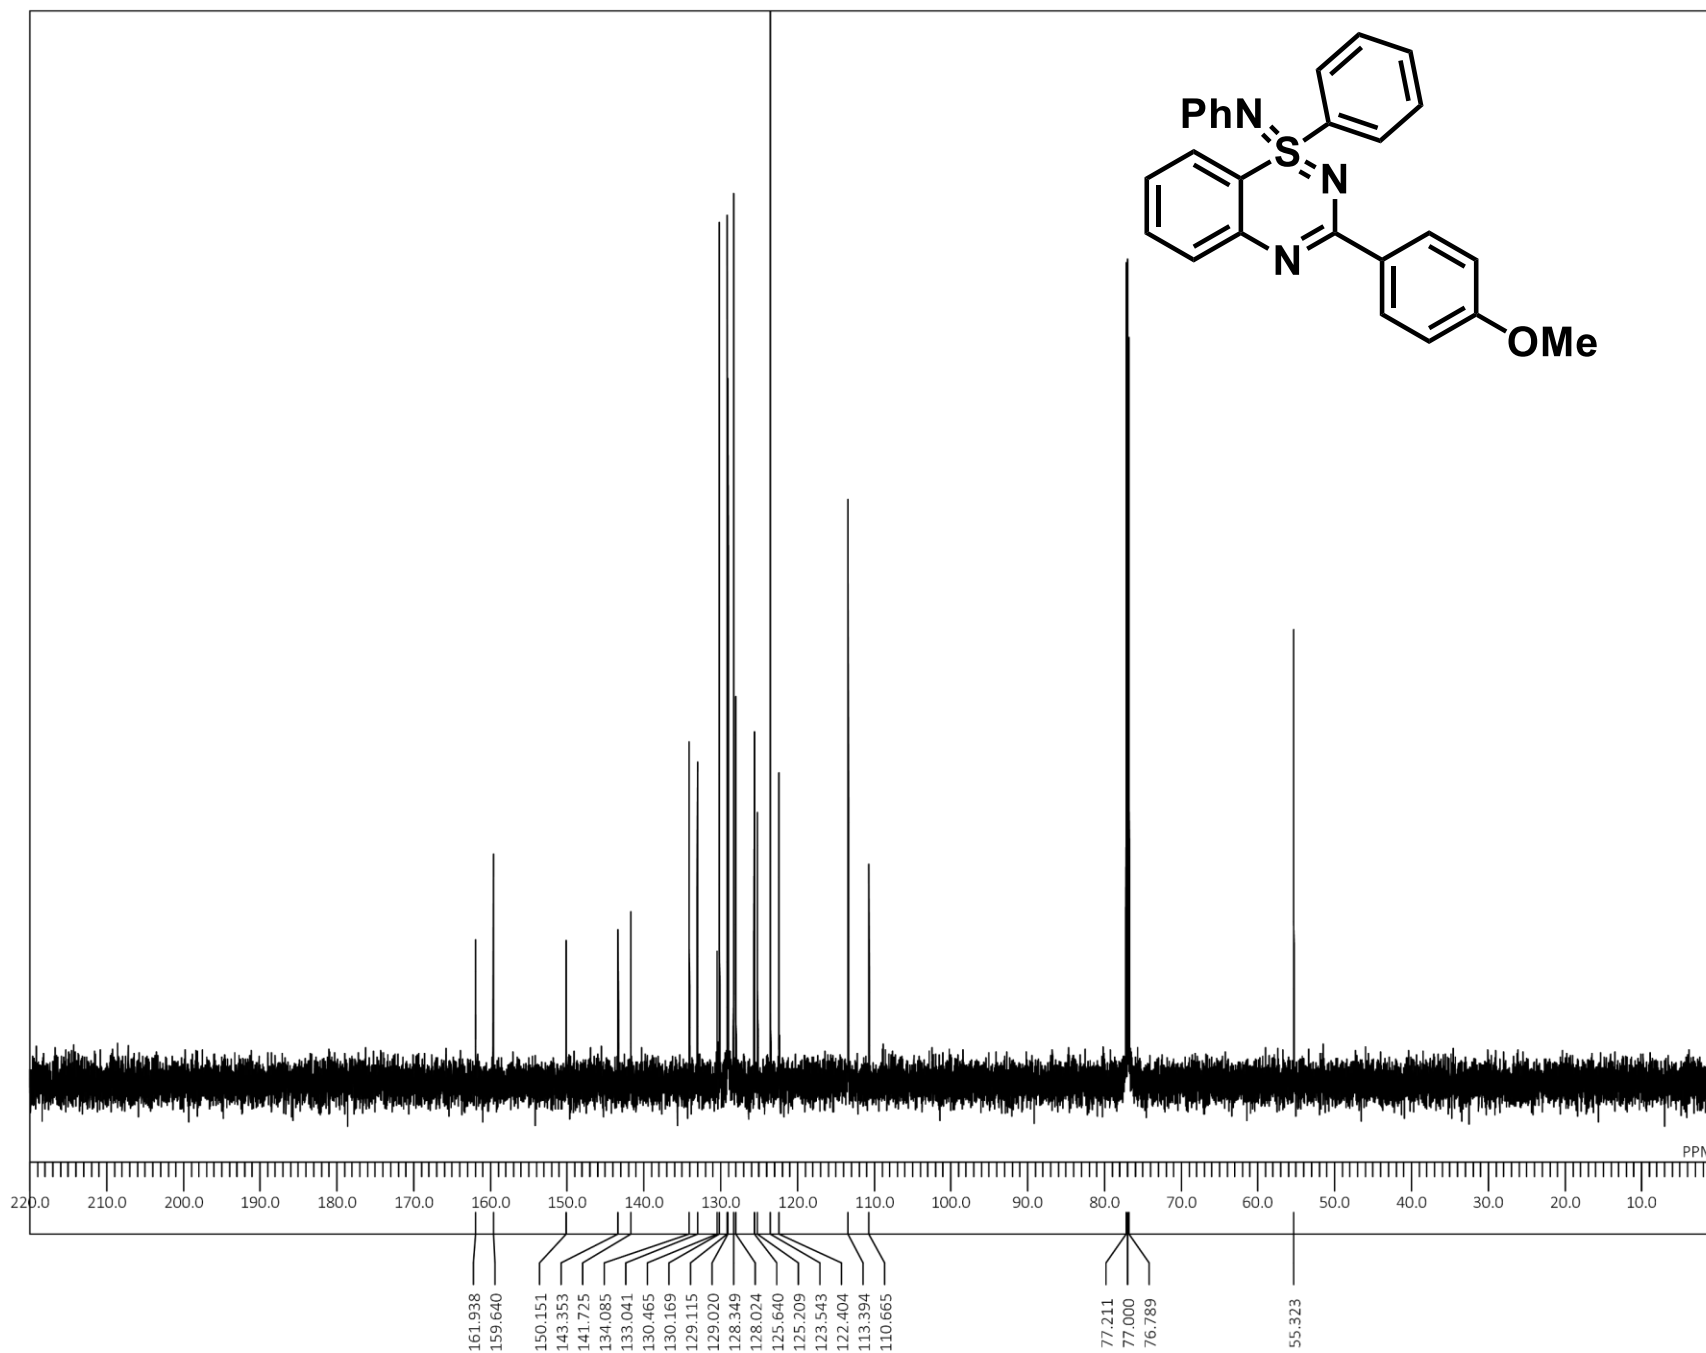

DFILE AM03003\_diox\_pOMe\_13C-1.als  
COMNT single pulse decoupled gated NOE  
DATIM 2024-12-18 23:57:01  
OBNUC 13C  
EXMOD single\_pulse\_dec  
OBFRQ 150.92 MHz  
OBSET 8.52 KHz  
OBFIN 1.74 Hz  
POINT 26214  
FREQU 37878.21 Hz  
SCANS 80  
ACQTM 0.6921 sec  
PD 2.0000 sec  
PW1 3.83 usec  
IRNUC 1H  
CTEMP 17.4 c  
SLVNT CDCL3  
EXREF 77.00 ppm  
BF 0.20 Hz  
RGAIN 60

# <sup>1</sup>H NMR (600.17 MHz, CDCl<sub>3</sub>) spectrum of 3ae

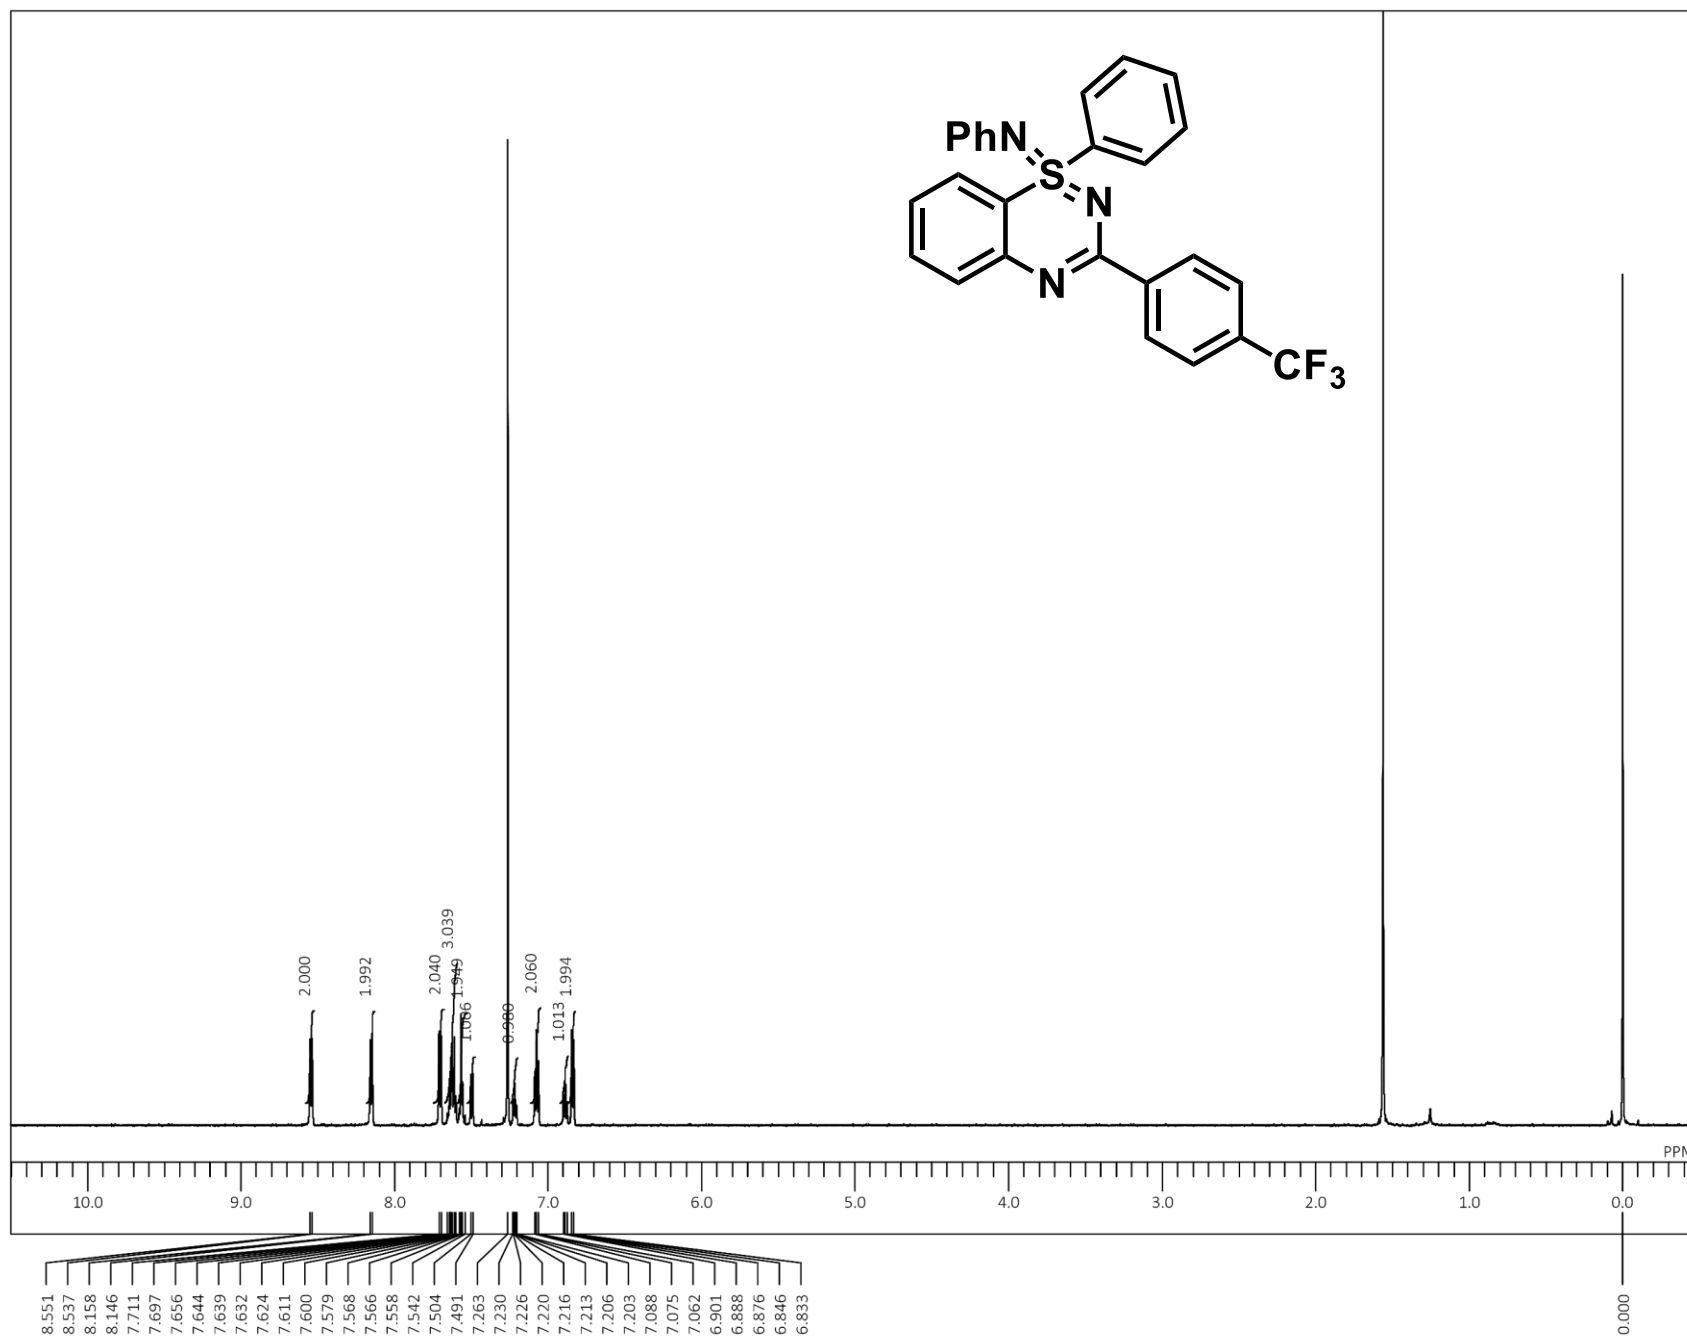

DFILE TE02061\_dio\_pCF3\_1H.als  
COMNT TE02061\_dio\_pCF3\_1H  
DATIM 2025-01-20 10:28:55  
OBNUC 1H  
EXMOD single\_pulse.ex2  
OBFRQ 600.17 MHz  
OBSET 5.30 KHz  
OBFIN 5.47 Hz  
POINT 209712  
FREQU 9008.87 Hz  
SCANS 8  
ACQTM 2.9098 sec  
PD 5.0000 sec  
PW1 7.00 usec  
IRNUC 1H  
CTEMP 18.6 c  
SLVNT CDCL3  
EXREF 0.00 ppm  
BF 0.70 Hz  
RGAIN 52



# $^{13}\text{C}\{^1\text{H}\}$ NMR (150.92 MHz, $\text{CDCl}_3$ ) spectrum of 3ae

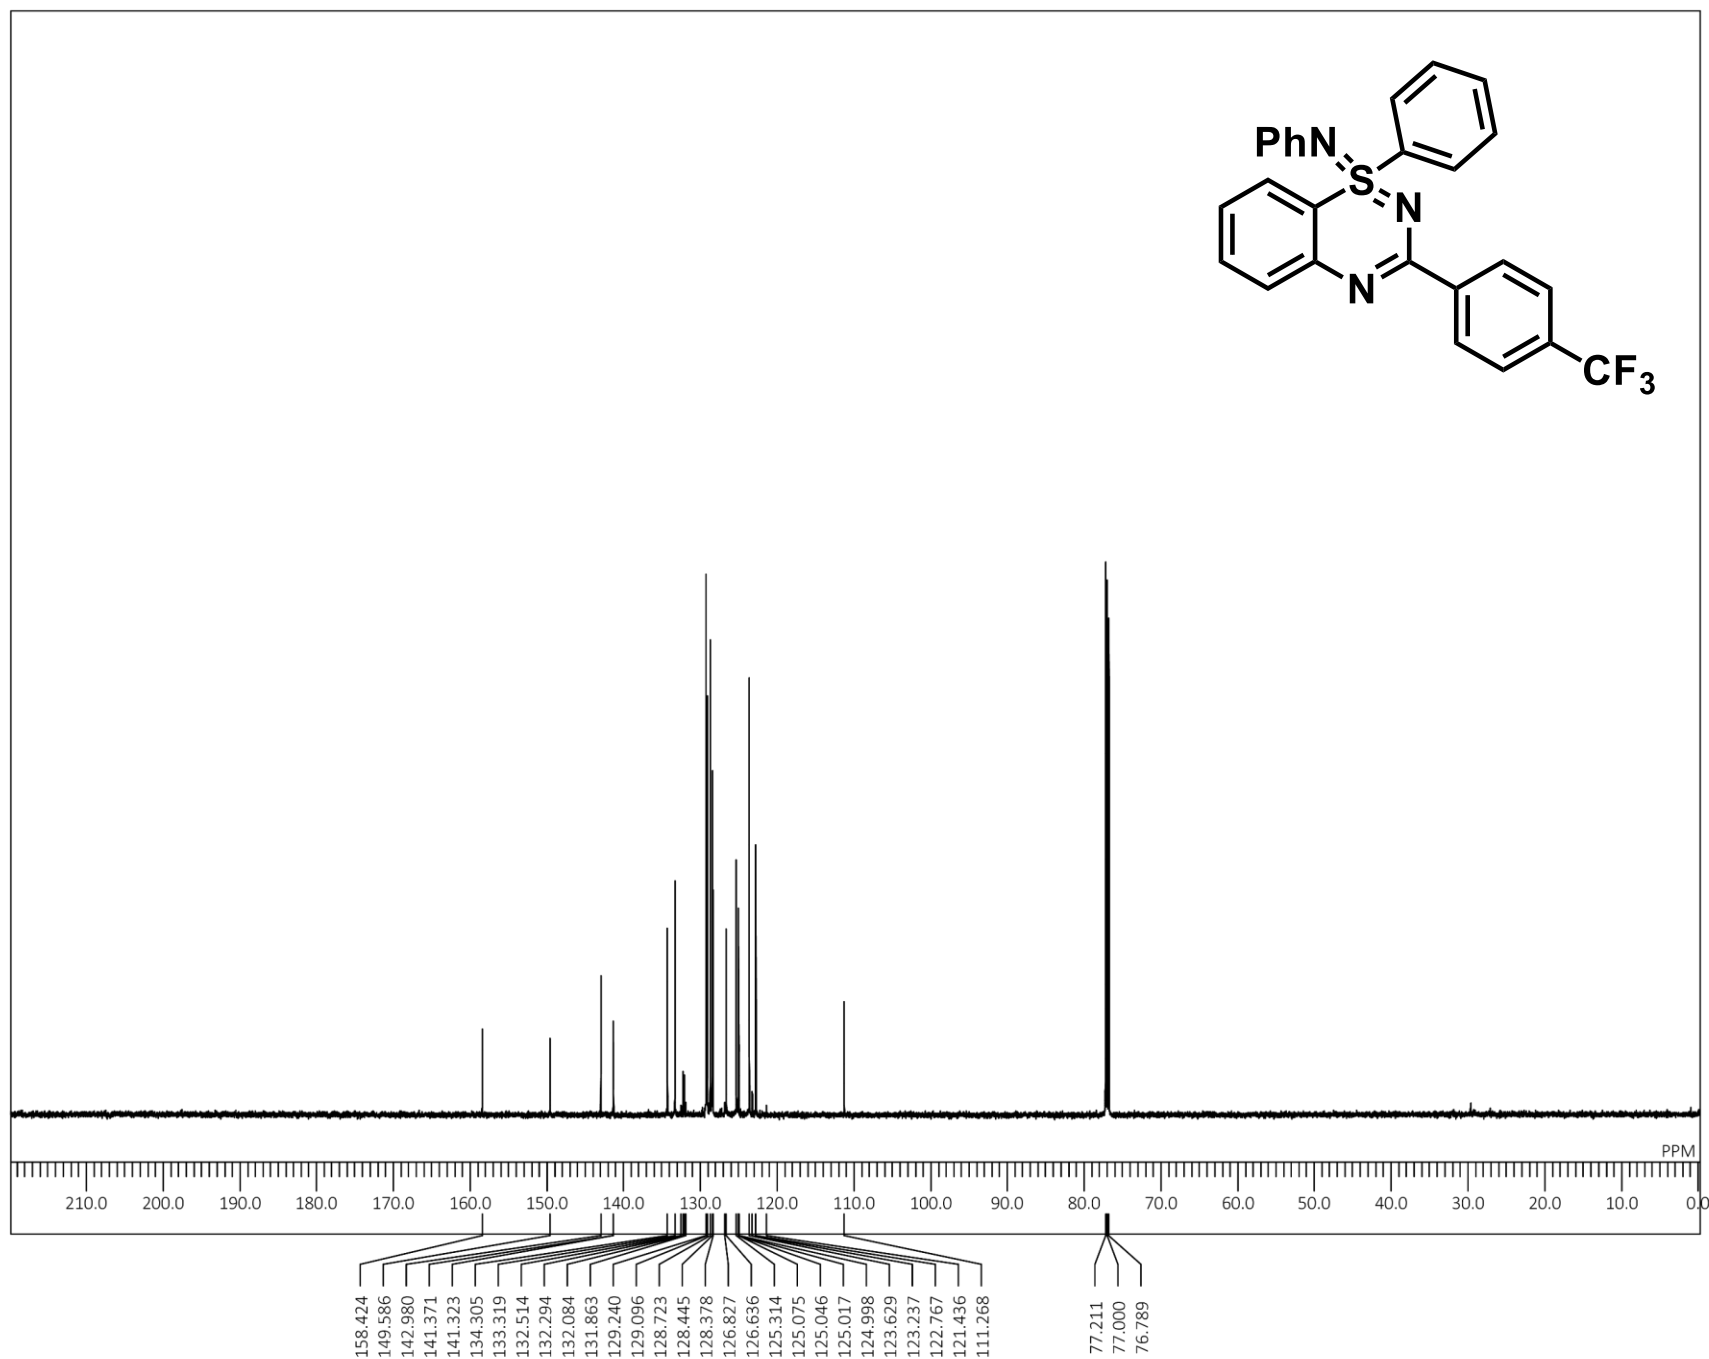

DFILE TE02061\_dio\_pCF3\_13C.als  
COMNT TE02061\_dio\_pCF3\_13C  
DATIM 2025-01-21 00:04:59  
OBNUC 13C  
EXMOD single\_pulse\_dec  
OBFRQ 150.92 MHz  
OBSET 8.52 KHz  
OBFIN 1.74 Hz  
POINT 26214  
FREQU 37878.21 Hz  
SCANS 581  
ACQTM 0.6921 sec  
PD 2.0000 sec  
PW1 3.83 usec  
IRNUC 1H  
CTEMP 20.5 c  
SLVNT CDCL3  
EXREF 77.00 ppm  
BF 1.00 Hz  
RGAIN 60

# $^{19}\text{F}$ NMR (564.67 MHz, $\text{CDCl}_3$ ) spectrum of 3ae

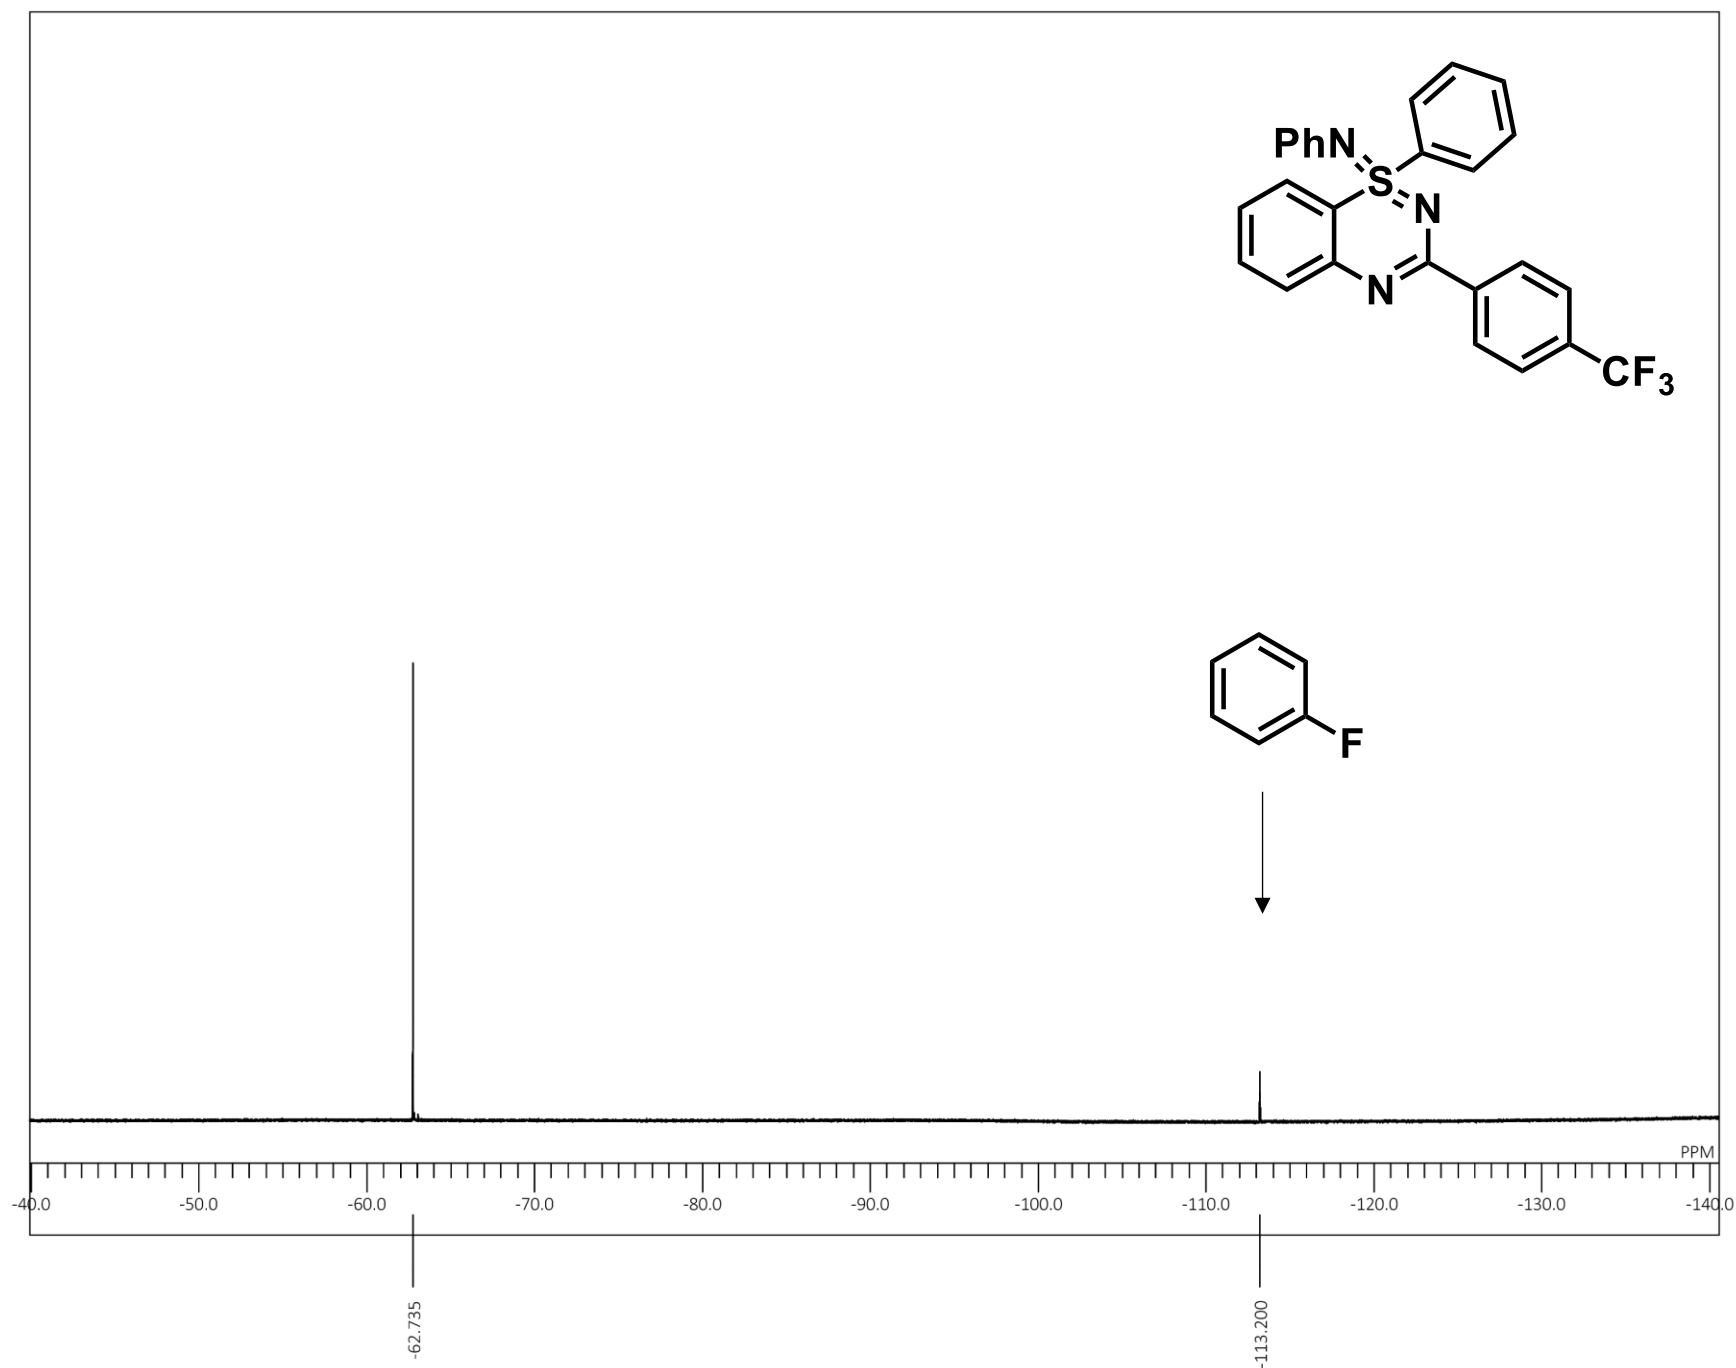

DFILE TE02061\_dio\_pCF3\_19F.als  
COMNT TE02061\_dio\_pCF3\_19F  
DATIM 2025-01-20 23:33:31  
OBNUC 19F  
EXMOD single\_pulse.ex2  
OBFRQ 564.67 MHz  
OBSET 5.29 KHz  
OBFIN 1.21 Hz  
POINT 209712  
FREQU 56817.31 Hz  
SCANS 8  
ACQTM 0.4614 sec  
PD 5.0000 sec  
PW1 6.65 usec  
IRNUC 19F  
CTEMP 19.7 c  
SLVNT CDCL3  
EXREF -113.20 ppm  
BF 1.00 Hz  
RGAIN 50

# $^1\text{H}$ NMR (399.78 MHz, $\text{CDCl}_3$ ) spectrum of 3af

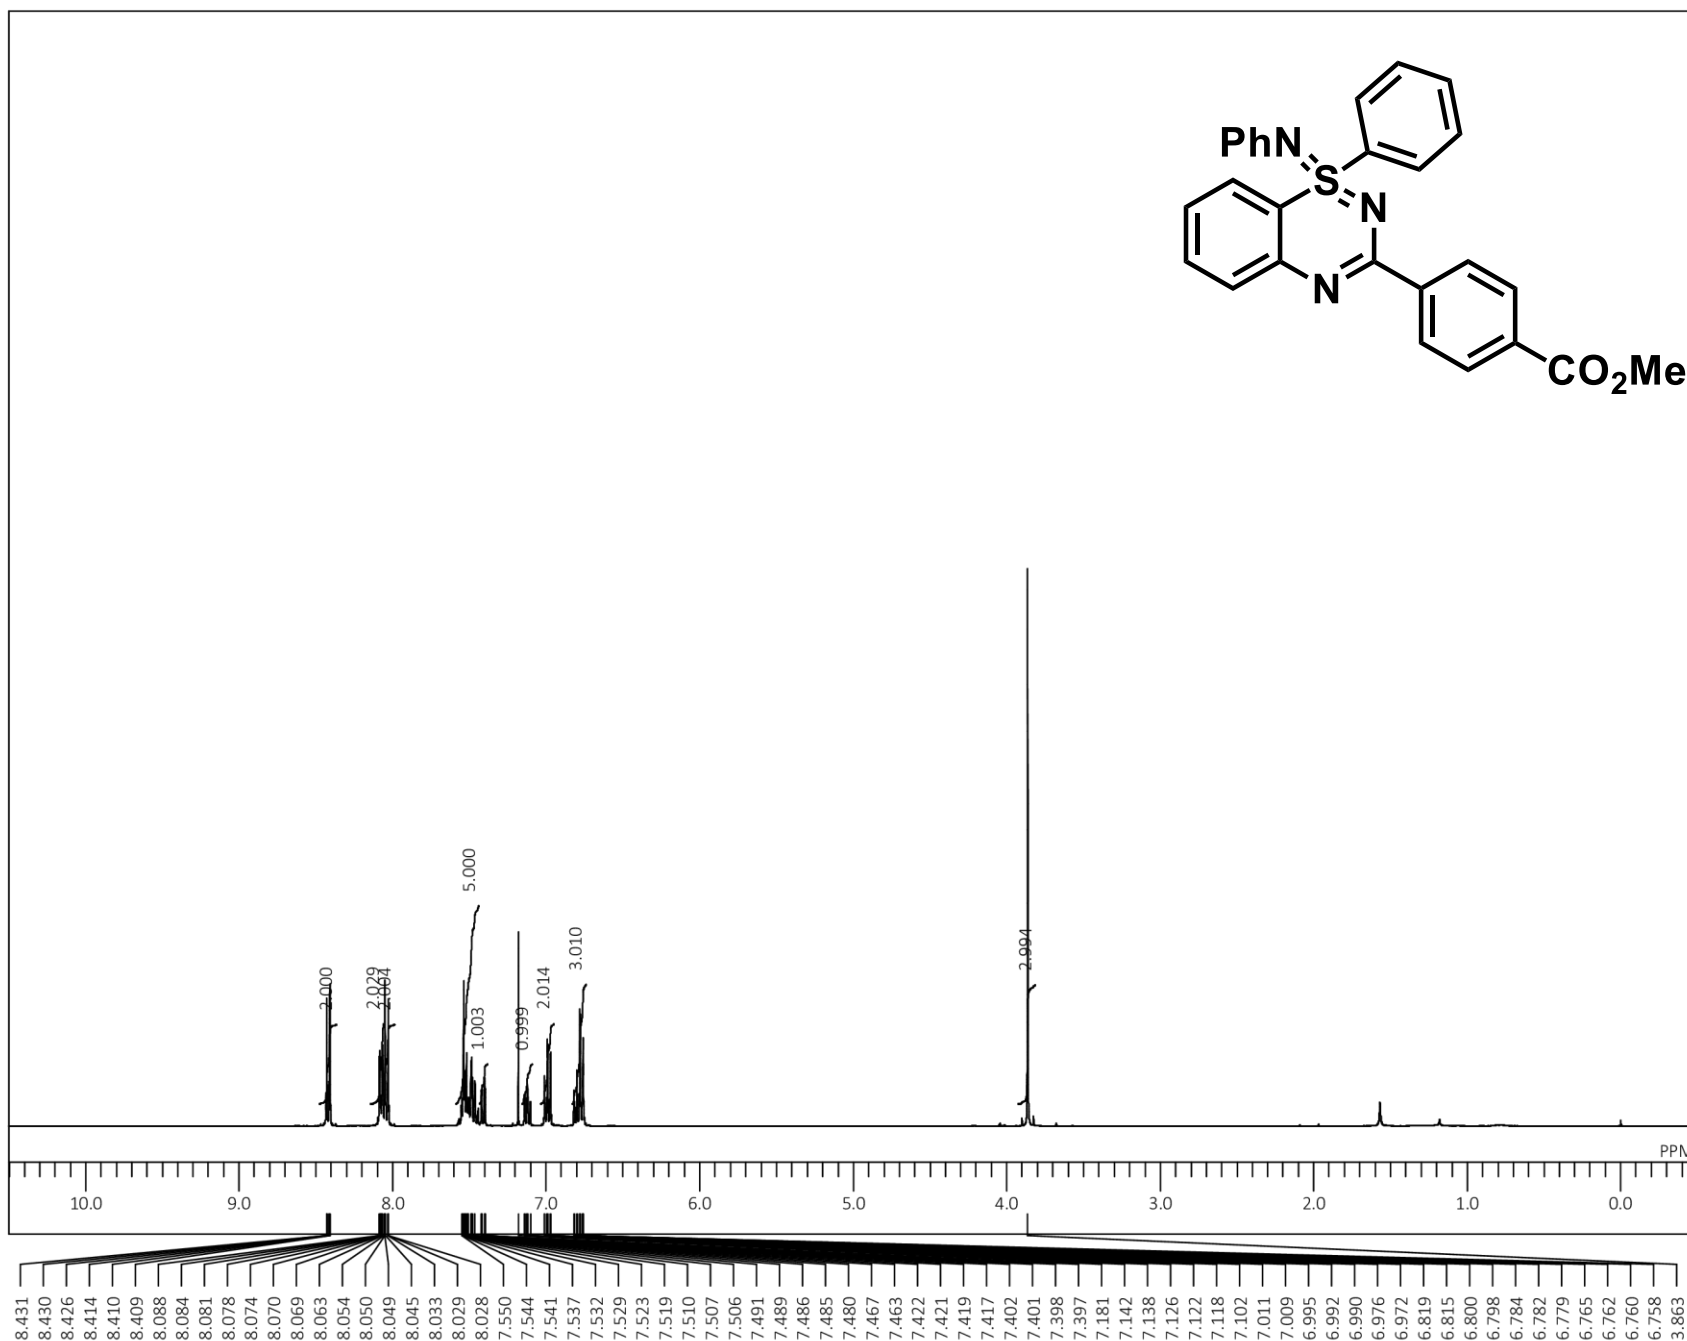

|       |                           |
|-------|---------------------------|
| DFILE | TE02111_dio_pCO2Me_1H.als |
| COMNT | TE02111_dio_pCO2Me_1H     |
| DATIM | 2025-04-02 14:58:25       |
| OBNUC | $^1\text{H}$              |
| EXMOD | proton.jxp                |
| OBFRQ | 399.78 MHz                |
| OBSET | 4.19 KHz                  |
| OBFIN | 7.29 Hz                   |
| POINT | 49177                     |
| FREQU | 5995.20 Hz                |
| SCANS | 8                         |
| ACQTM | 2.0507 sec                |
| PD    | 5.0000 sec                |
| PW1   | 3.45 usec                 |
| IRNUC | $^1\text{H}$              |
| CTEMP | 19.4 c                    |
| SLVNT | $\text{CDCl}_3$           |
| EXREF | 0.00 ppm                  |
| BF    | 0.12 Hz                   |
| RGAIN | 56                        |

# $^{13}\text{C}\{^1\text{H}\}$ NMR (100.53 MHz, $\text{CDCl}_3$ ) spectrum of 3af

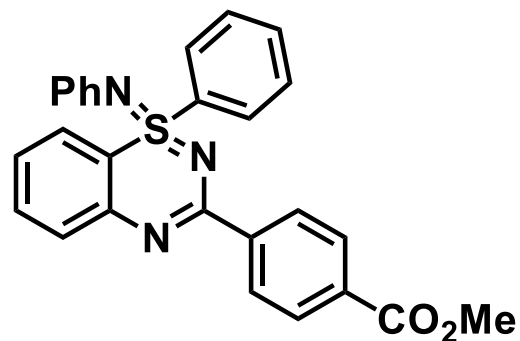

DFILE TE02111\_dio\_pCO2Me\_13C\_data  
COMNT TE02111\_dio\_pCO2Me\_13C  
DATIM 2025-04-02 02:04:55  
OBNUC 13C  
EXMOD carbon.jpg  
OBFRQ 100.53 MHz  
OBSET 5.35 KHz  
OBFIN 5.86 Hz  
POINT 502655  
FREQU 31407.04 Hz  
SCANS 5000  
ACQTM 1.0003 sec  
PD 2.0000 sec  
PW1 3.60 usec  
IRNUC 1H  
CTEMP 18.3 c  
SLVNT CDCL3  
EXREF 77.00 ppm  
BF 0.10 Hz  
RGAIN 50

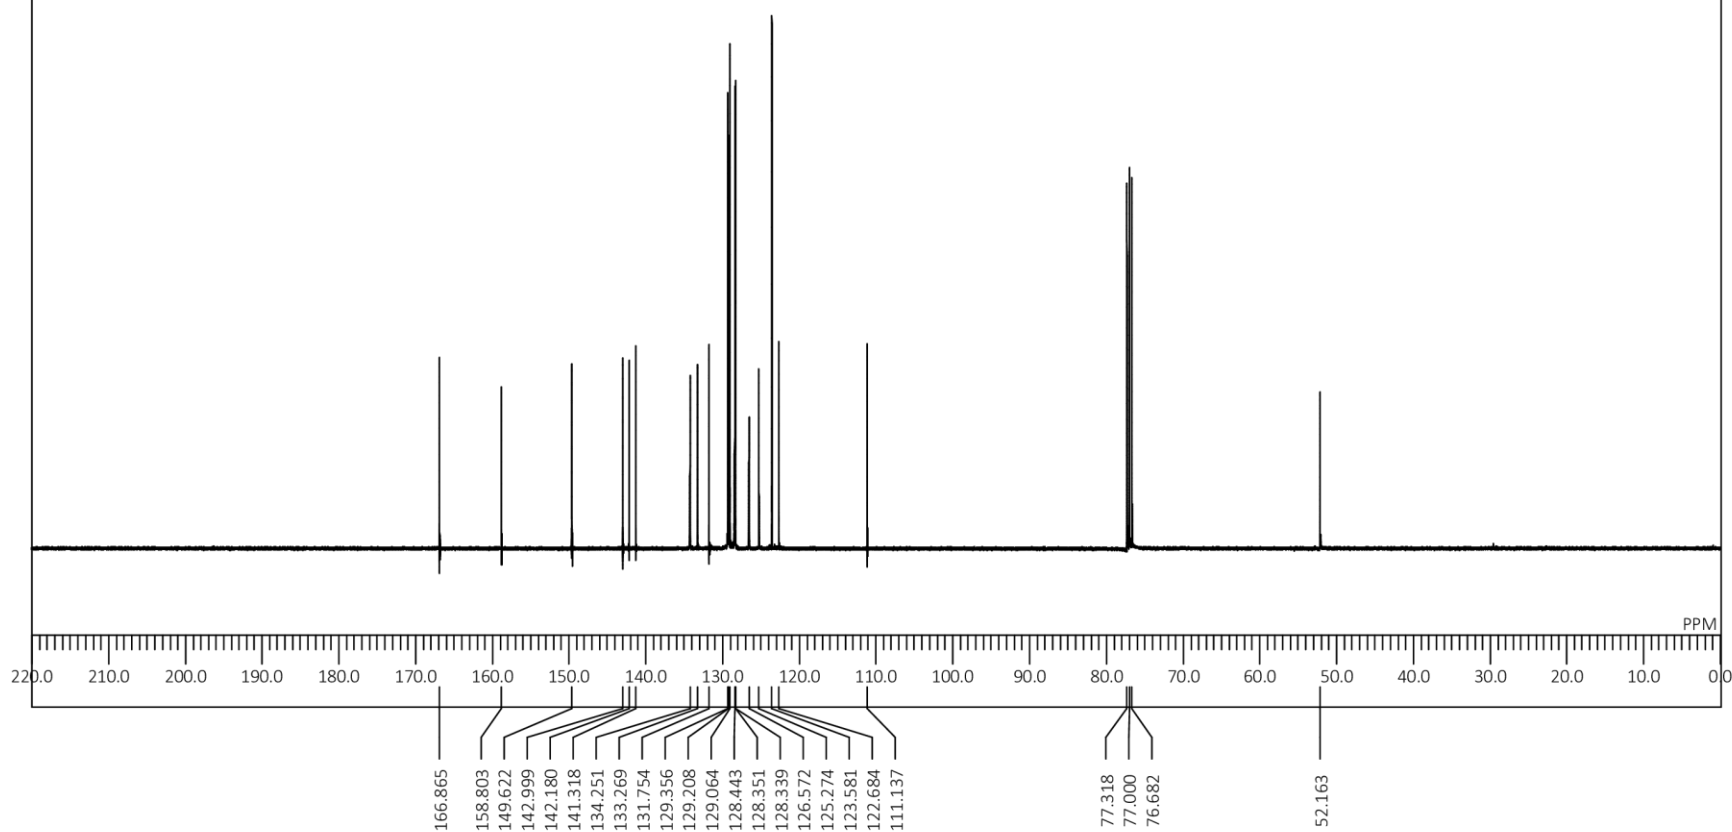

# <sup>1</sup>H NMR (600.17 MHz, CDCl<sub>3</sub>) spectrum of 3ag

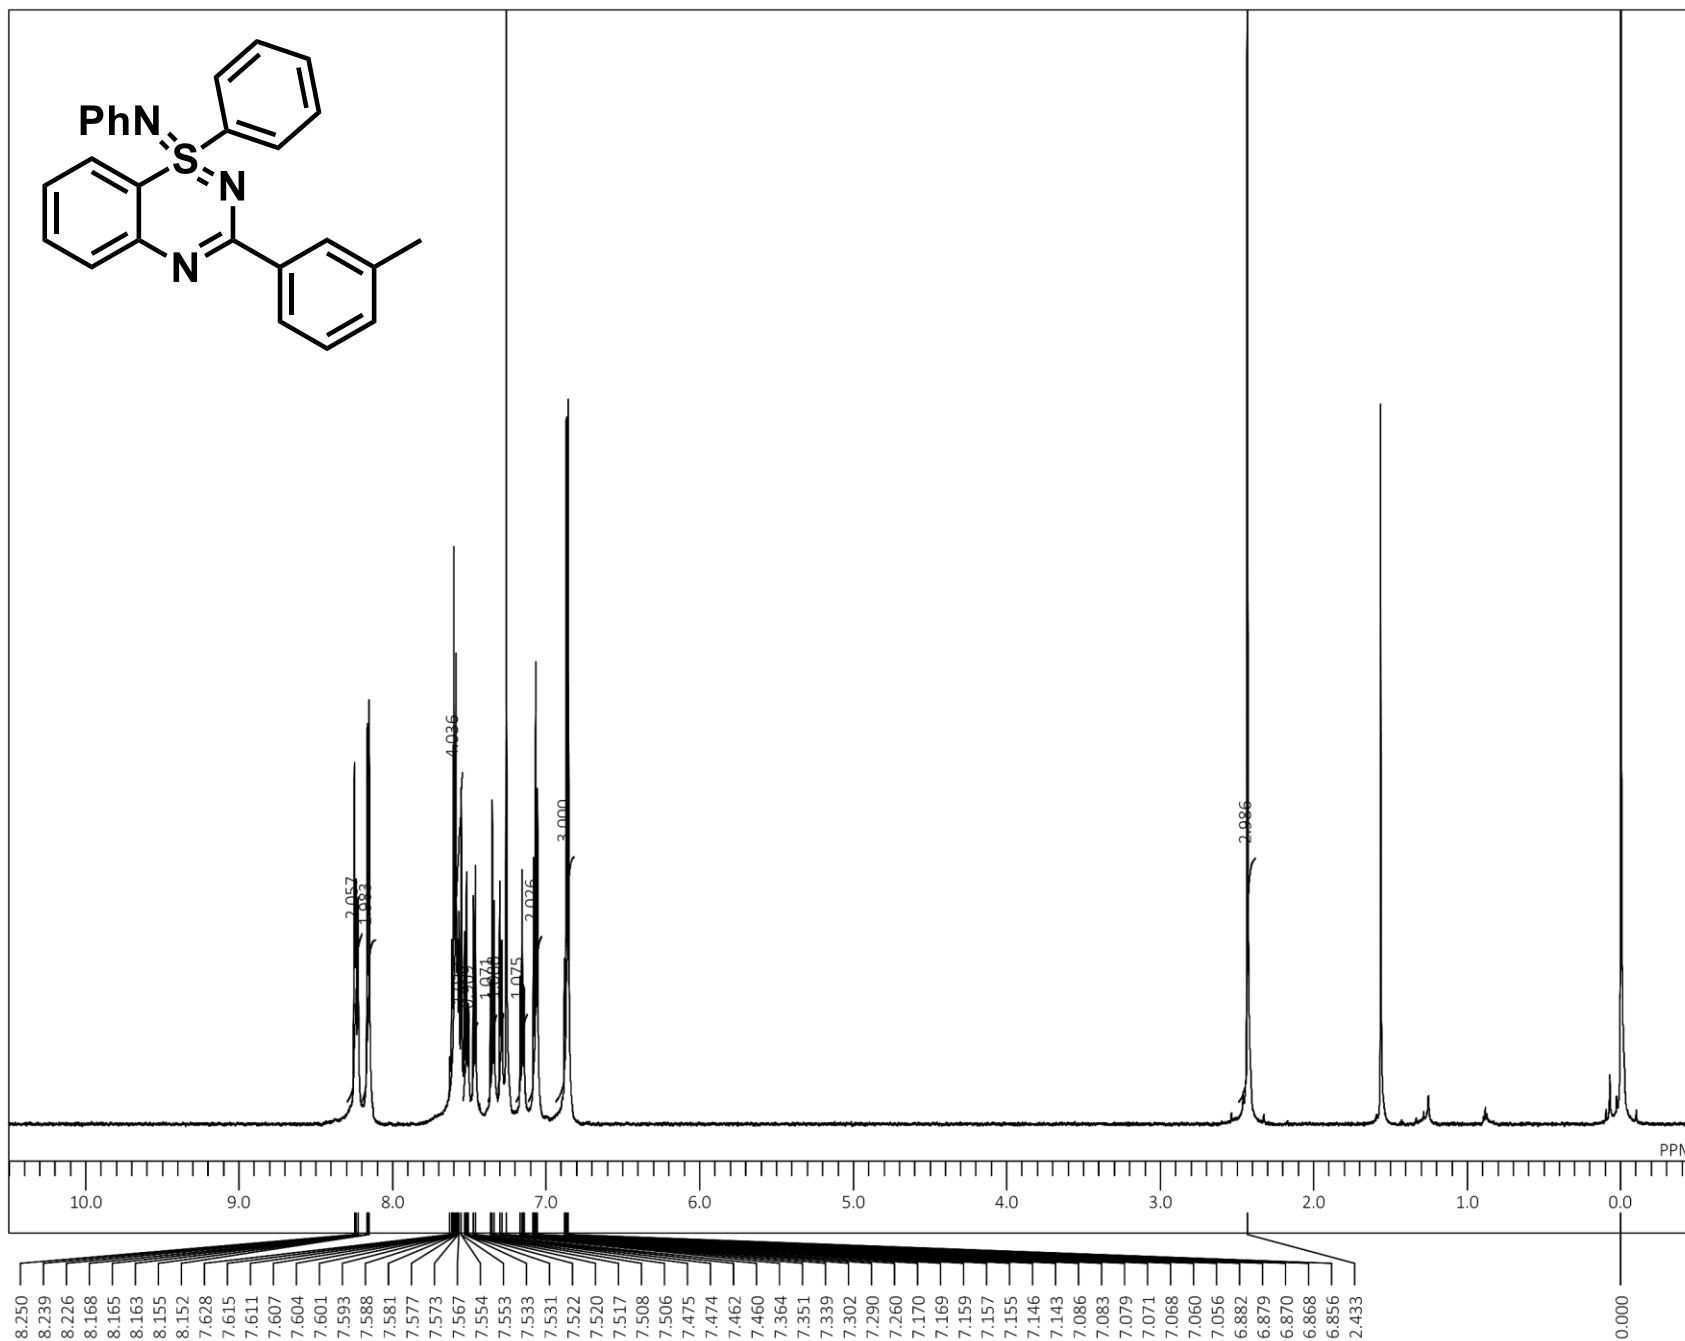

DFILE AM\_dio\_mMe\_1H-1.als  
COMNT AM\_dio\_mMe\_1H  
DATIM 2025-01-22 02:33:39  
OBNUC 1H  
EXMOD single\_pulse.ex2  
OBFRQ 600.17 MHz  
OBSET 5.30 KHz  
OBFIN 5.47 Hz  
POINT 26214  
FREQU 9008.87 Hz  
SCANS 8  
ACQTM 2.9098 sec  
PD 10.0000 sec  
PW1 7.00 usec  
IRNUC 1H  
CTEMP 19.4 c  
SLVNT CDCL3  
EXREF 0.00 ppm  
BF 0.52 Hz  
RGAIN 50

# $^{13}\text{C}\{^1\text{H}\}$ NMR (150.92 MHz, $\text{CDCl}_3$ ) spectrum of 3ag

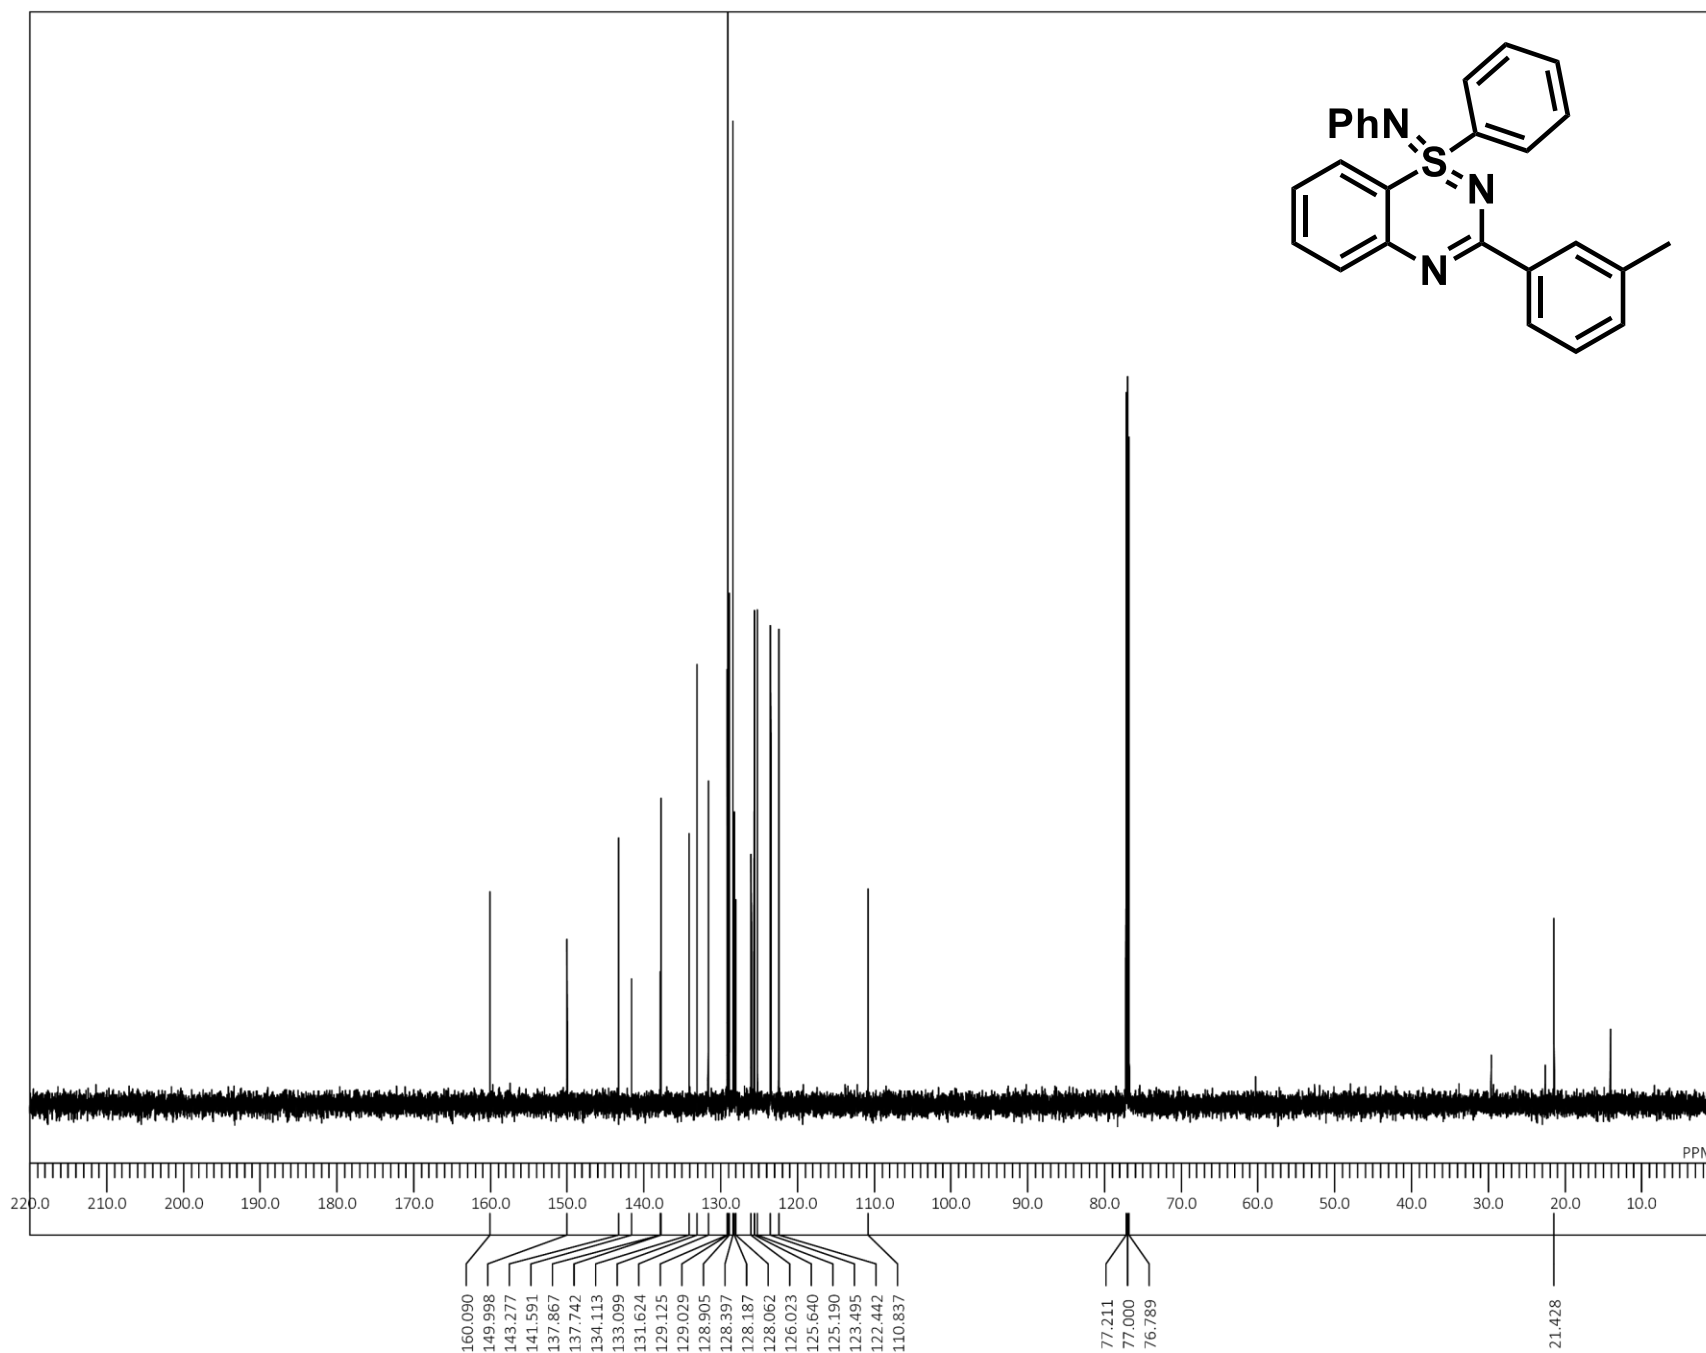

DFILE AM03017\_dio\_mMe\_13C-1.als  
COMNT AM03017\_dio\_mMe\_13C  
DATIM 2024-12-20 19:28:09  
OBNUC 13C  
EXMOD single\_pulse\_dec  
OBFRQ 150.92 MHz  
OBSET 8.52 KHz  
OBFIN 1.74 Hz  
POINT 26214  
FREQU 37878.21 Hz  
SCANS 65  
ACQTM 0.6921 sec  
PD 2.0000 sec  
PW1 3.83 usec  
IRNUC 1H  
CTEMP 16.8 c  
SLVNT CDCL3  
EXREF 77.00 ppm  
BF 0.12 Hz  
RGAIN 60

# <sup>1</sup>H NMR (594.17 MHz, CDCl<sub>3</sub>) spectrum of 3ah

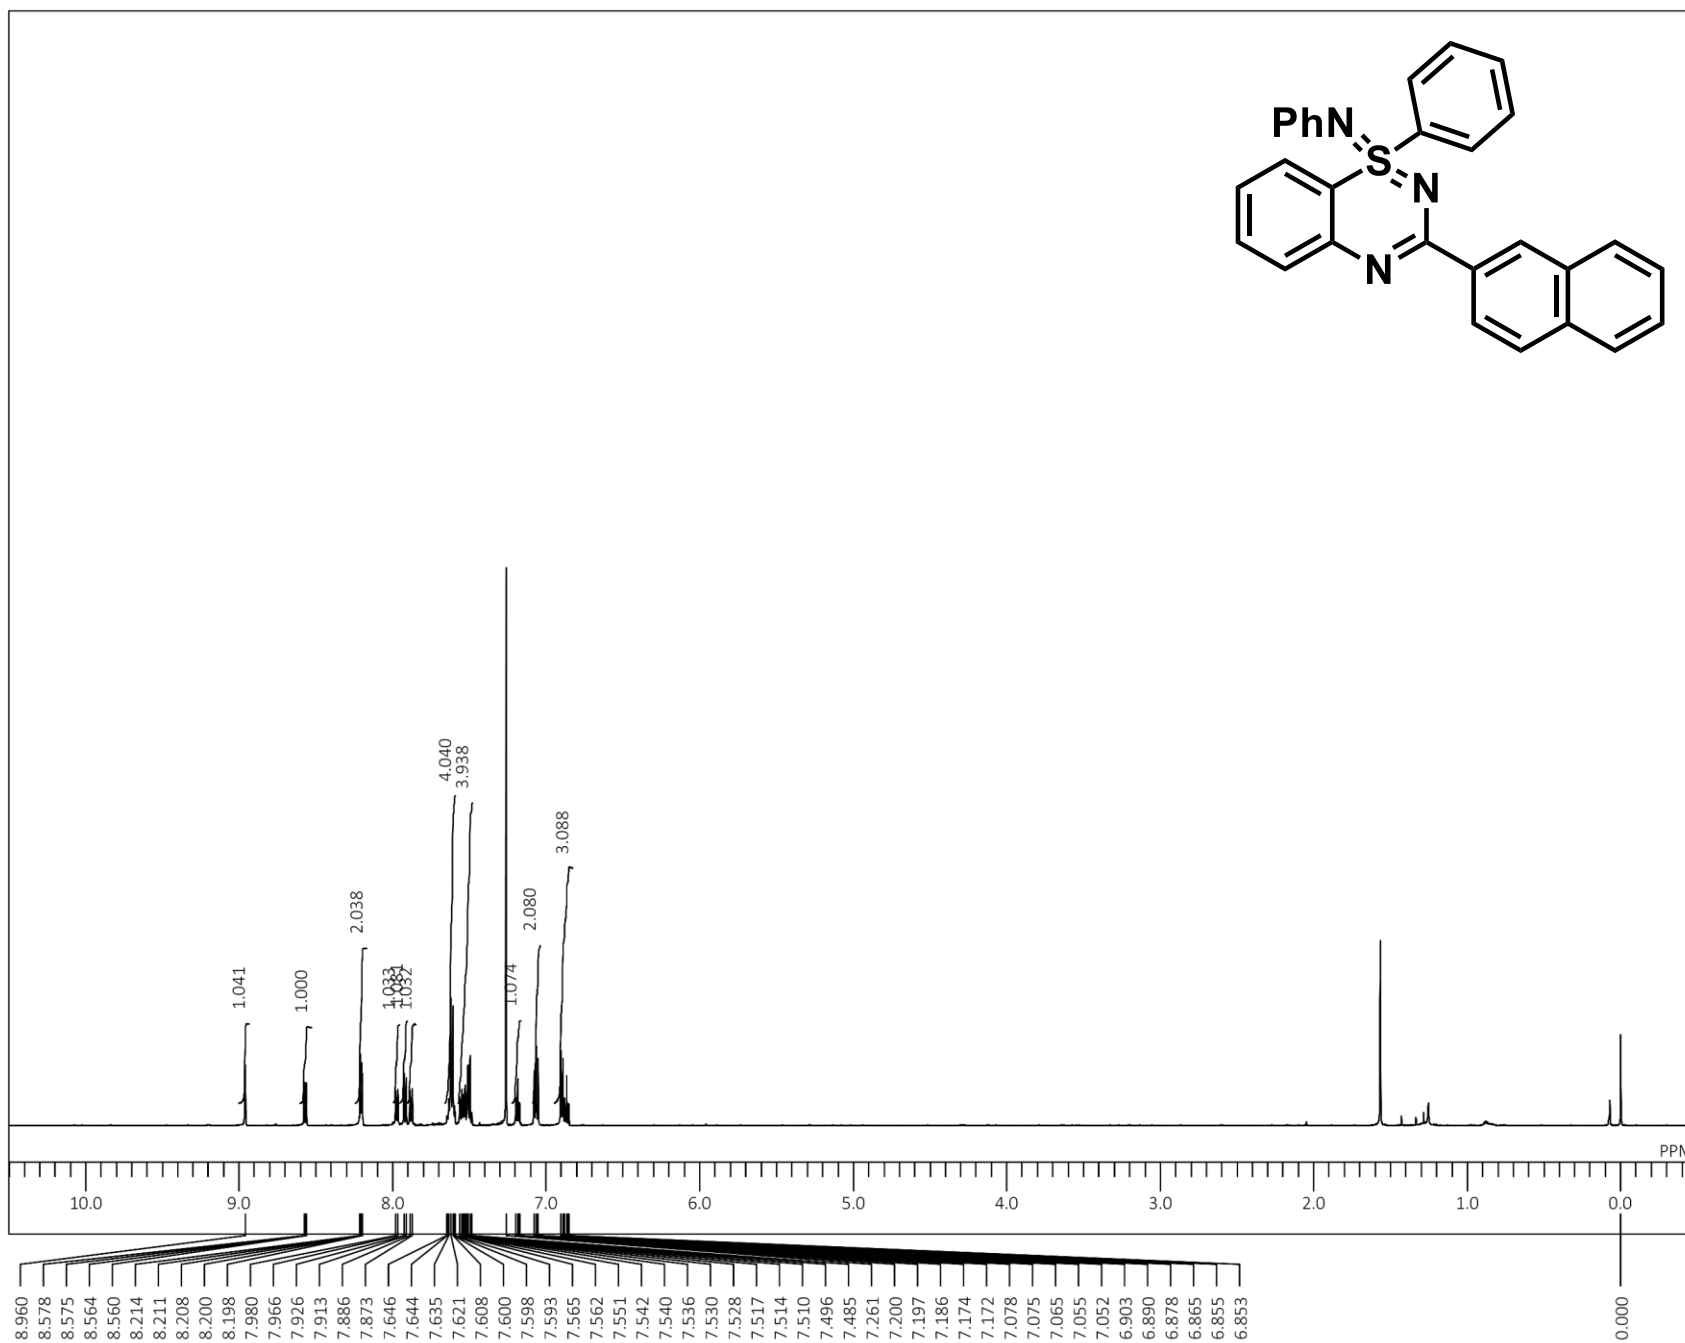

DFILE AM\_dio\_naph\_1H\_3\_Proton-1-1.  
COMNT single\_pulse  
DATIM 2025-02-05 17:01:01  
OBNUC 1H  
EXMOD proton.jxp  
OBFRQ 594.17 MHz  
OBSET 3.55 KHz  
OBFIN 2.53 Hz  
POINT 13107  
FREQU 8912.66 Hz  
SCANS 8  
ACQTM 1.4706 sec  
PD 5.0000 sec  
PW1 7.25 usec  
IRNUC 1H  
CTEMP 16.8 c  
SLVNT CDCL3  
EXREF 0.00 ppm  
BF 0.12 Hz  
RGAIN 54

# $^{13}\text{C}\{^1\text{H}\}$ NMR (149.41 MHz, $\text{CDCl}_3$ ) spectrum of 3ah

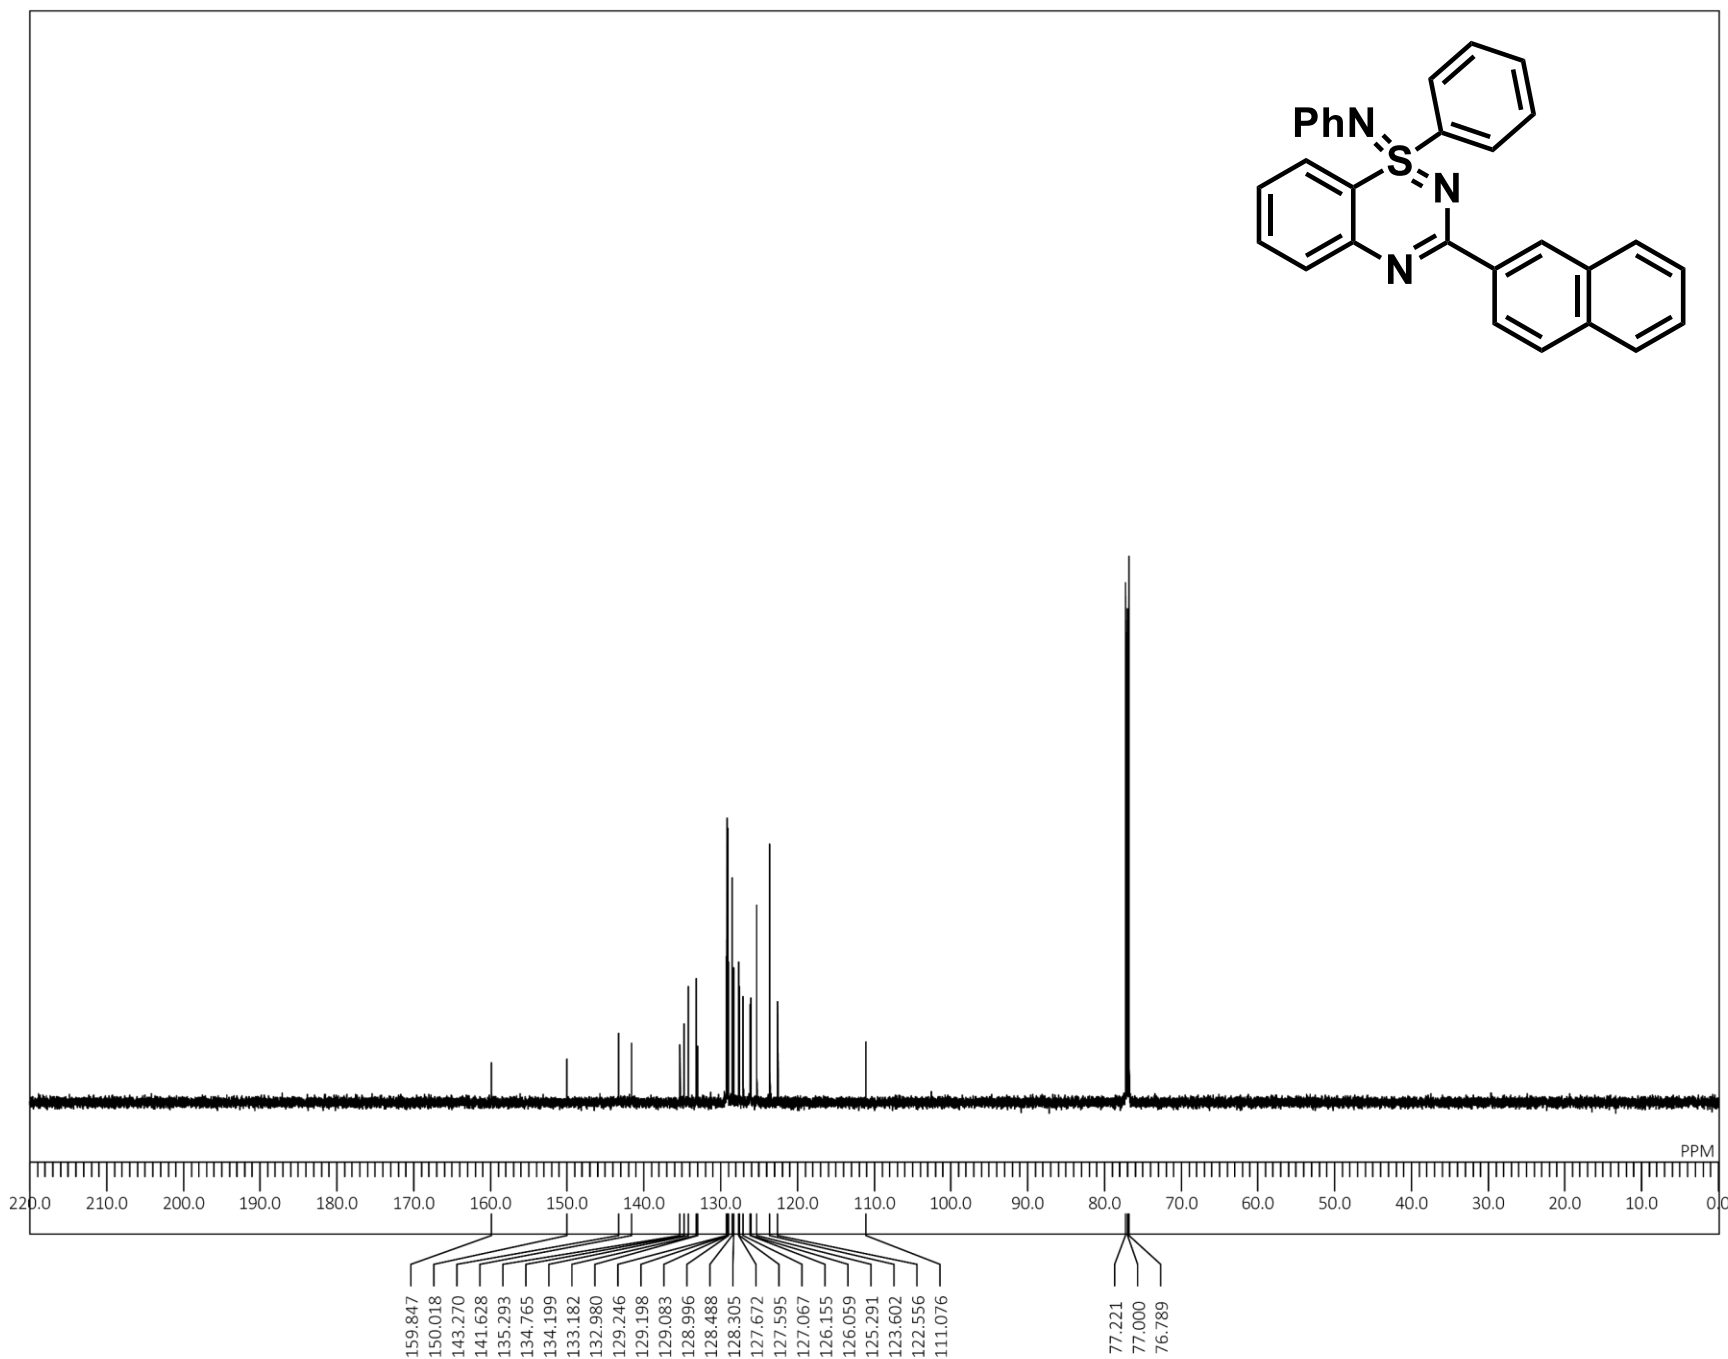

DFILE AM\_dio\_naph\_13C\_2\_Carbon-1-  
COMNT single pulse decoupled gated NO  
DATIM 2025-02-20 15:00:23  
OBNUC  $^{13}\text{C}$   
EXMOD carbon.jxp  
OBFRQ 149.41 MHz  
OBSET 9.23 KHz  
OBFIN 6.55 Hz  
POINT 32767  
FREQU 46992.48 Hz  
SCANS 126  
ACQTM 0.6973 sec  
PD 2.0000 sec  
PW1 3.20 usec  
IRNUC  $^1\text{H}$   
CTEMP 16.3 c  
SLVNT  $\text{CDCl}_3$   
EXREF 77.00 ppm  
BF 0.12 Hz  
RGAIN 60



# $^1\text{H}$ NMR (600.17 MHz, $\text{CDCl}_3$ ) spectrum of 3ai

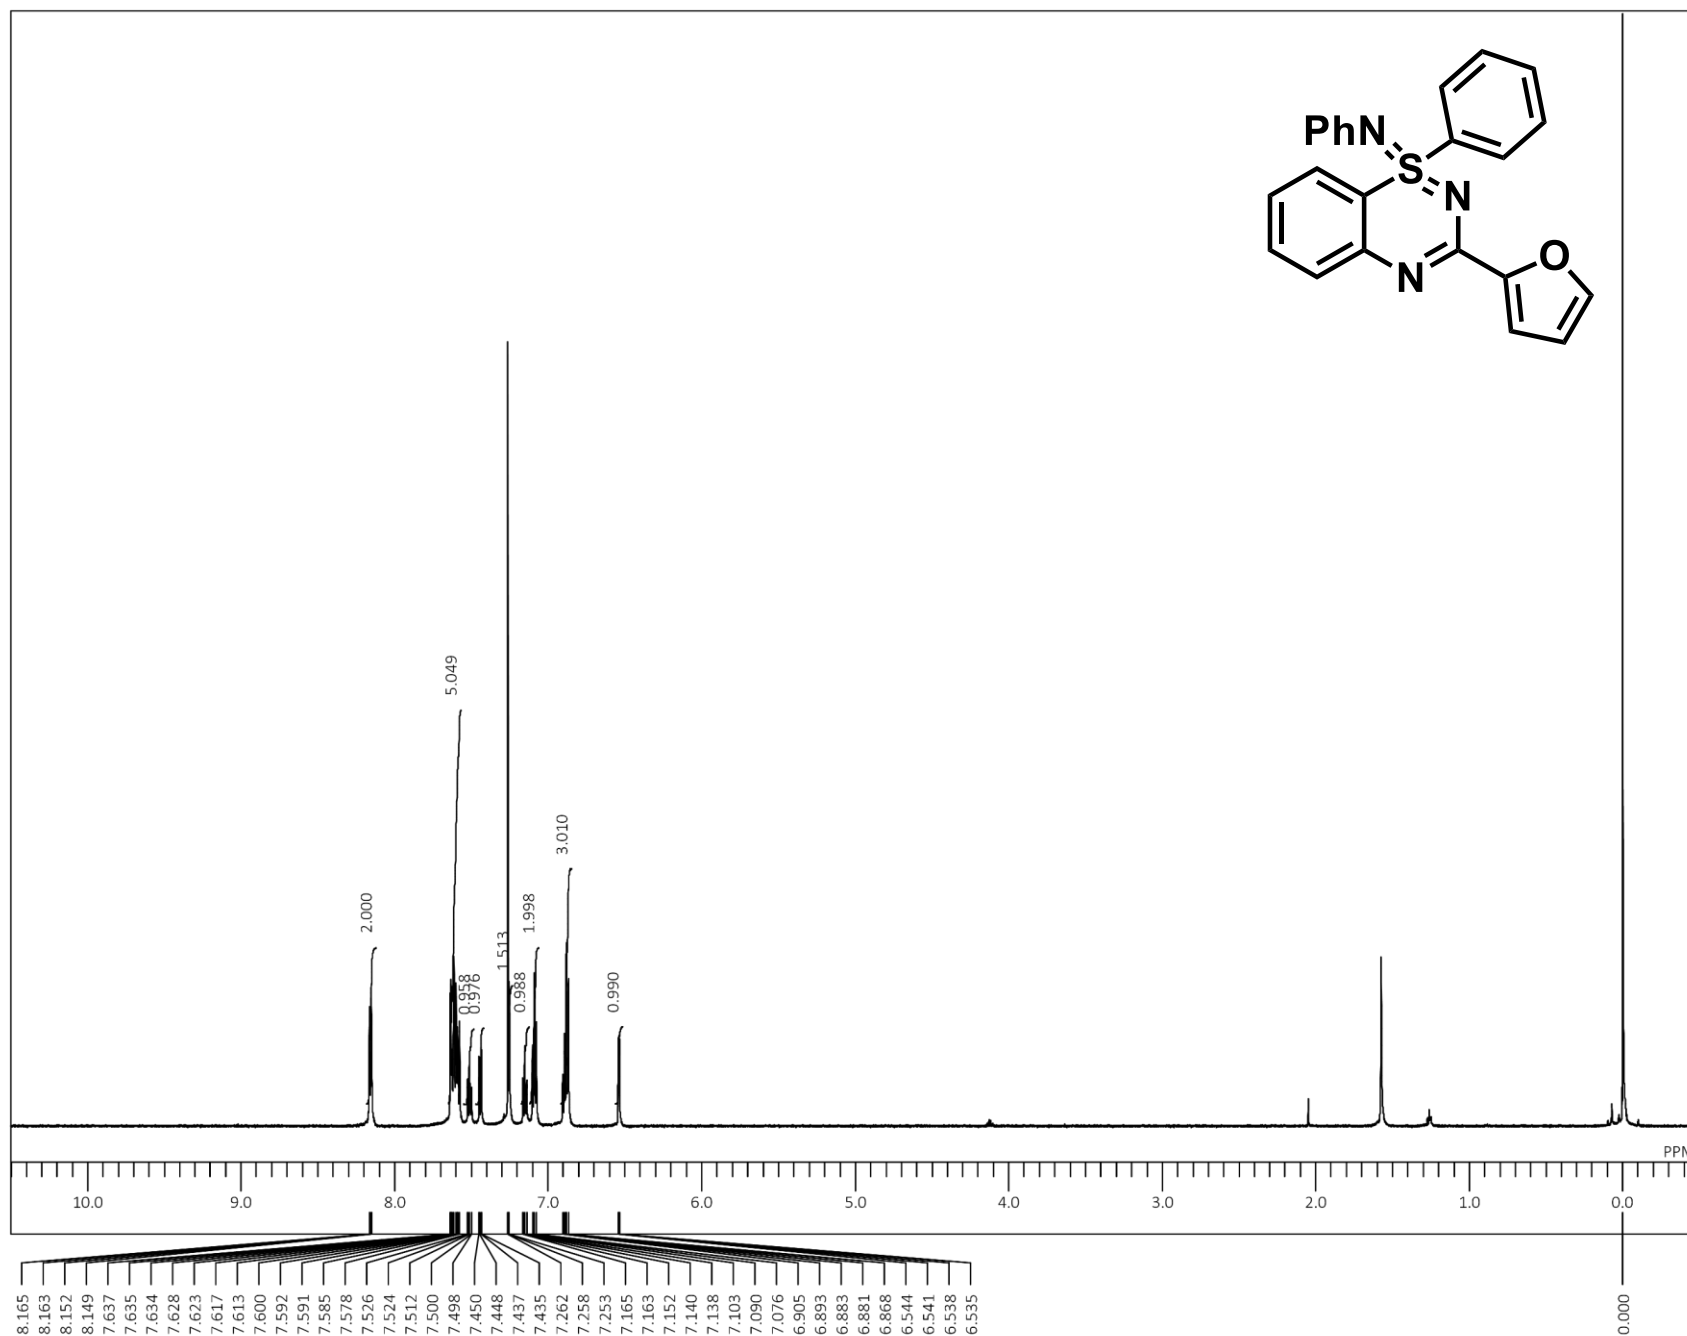

DFILE AM\_dio\_furan\_1H-1.als  
COMNT AM\_dio\_furan\_1H  
DATIM 2025-01-22 02:41:17  
OBNUC 1H  
EXMOD single\_pulse.ex2  
OBFRQ 600.17 MHz  
OBSET 5.30 KHz  
OBFIN 5.47 Hz  
POINT 26214  
FREQU 9008.87 Hz  
SCANS 8  
ACQTM 2.9098 sec  
PD 10.0000 sec  
PW1 7.00 usec  
IRNUC 1H  
CTEMP 19.4 c  
SLVNT CDCL3  
EXREF 0.00 ppm  
BF 0.12 Hz  
RGAIN 50

# $^{13}\text{C}\{^1\text{H}\}$ NMR (150.92 MHz, $\text{CDCl}_3$ ) spectrum of 3ai

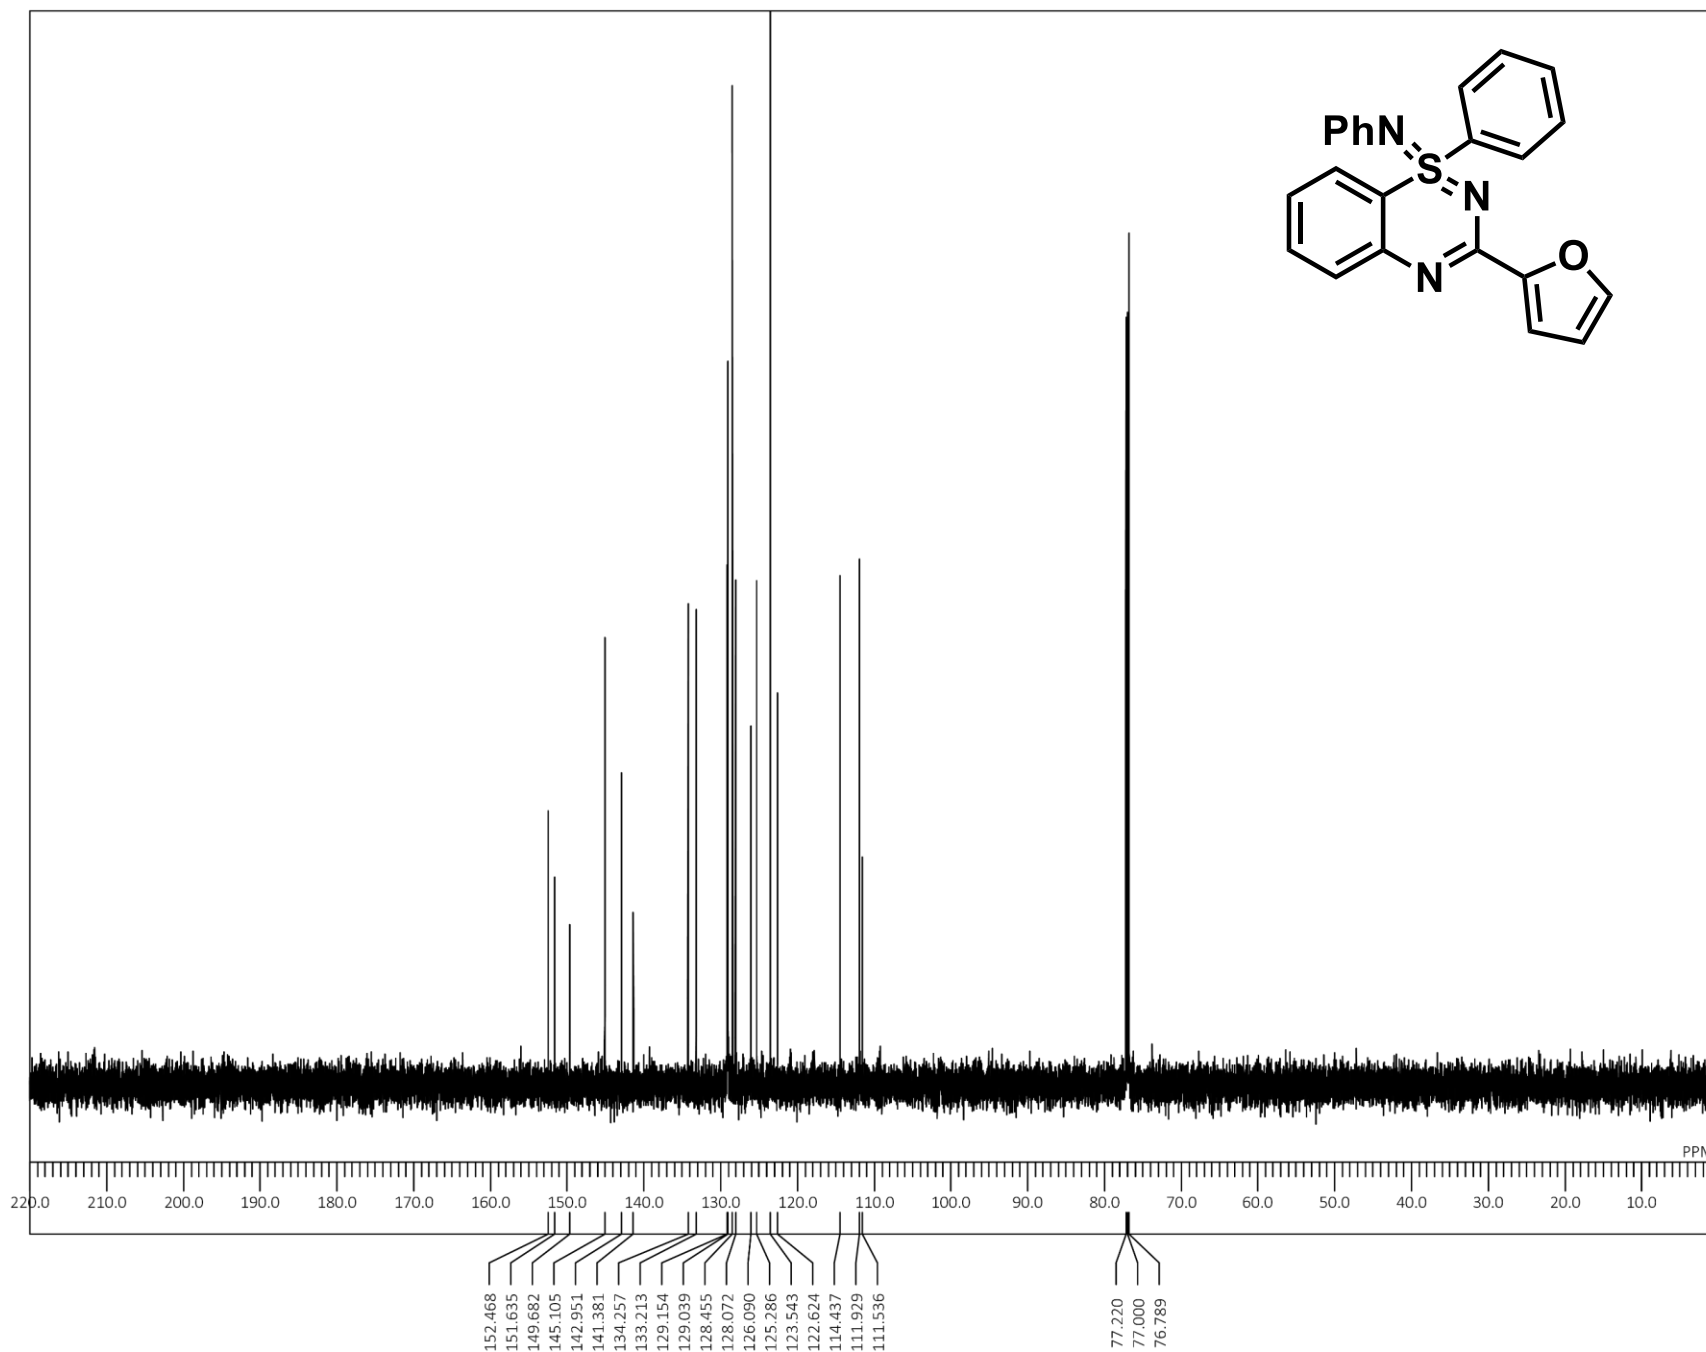

DFILE AM03009\_diox\_furan\_13C-1.als  
COMNT AM03007\_diox\_furan\_13C  
DATIM 2024-12-18 22:55:08  
OBNUC 13C  
EXMOD single\_pulse\_dec  
OBFRQ 150.92 MHz  
OBSET 8.52 KHz  
OBFIN 1.74 Hz  
POINT 26214  
FREQU 37878.21 Hz  
SCANS 34  
ACQTM 0.6921 sec  
PD 2.0000 sec  
PW1 3.83 usec  
IRNUC 1H  
CTEMP 17.2 c  
SLVNT CDCL3  
EXREF 77.00 ppm  
BF 0.12 Hz  
RGAIN 60

# <sup>1</sup>H NMR (600.17 MHz, CDCl<sub>3</sub>) spectrum of 3aj

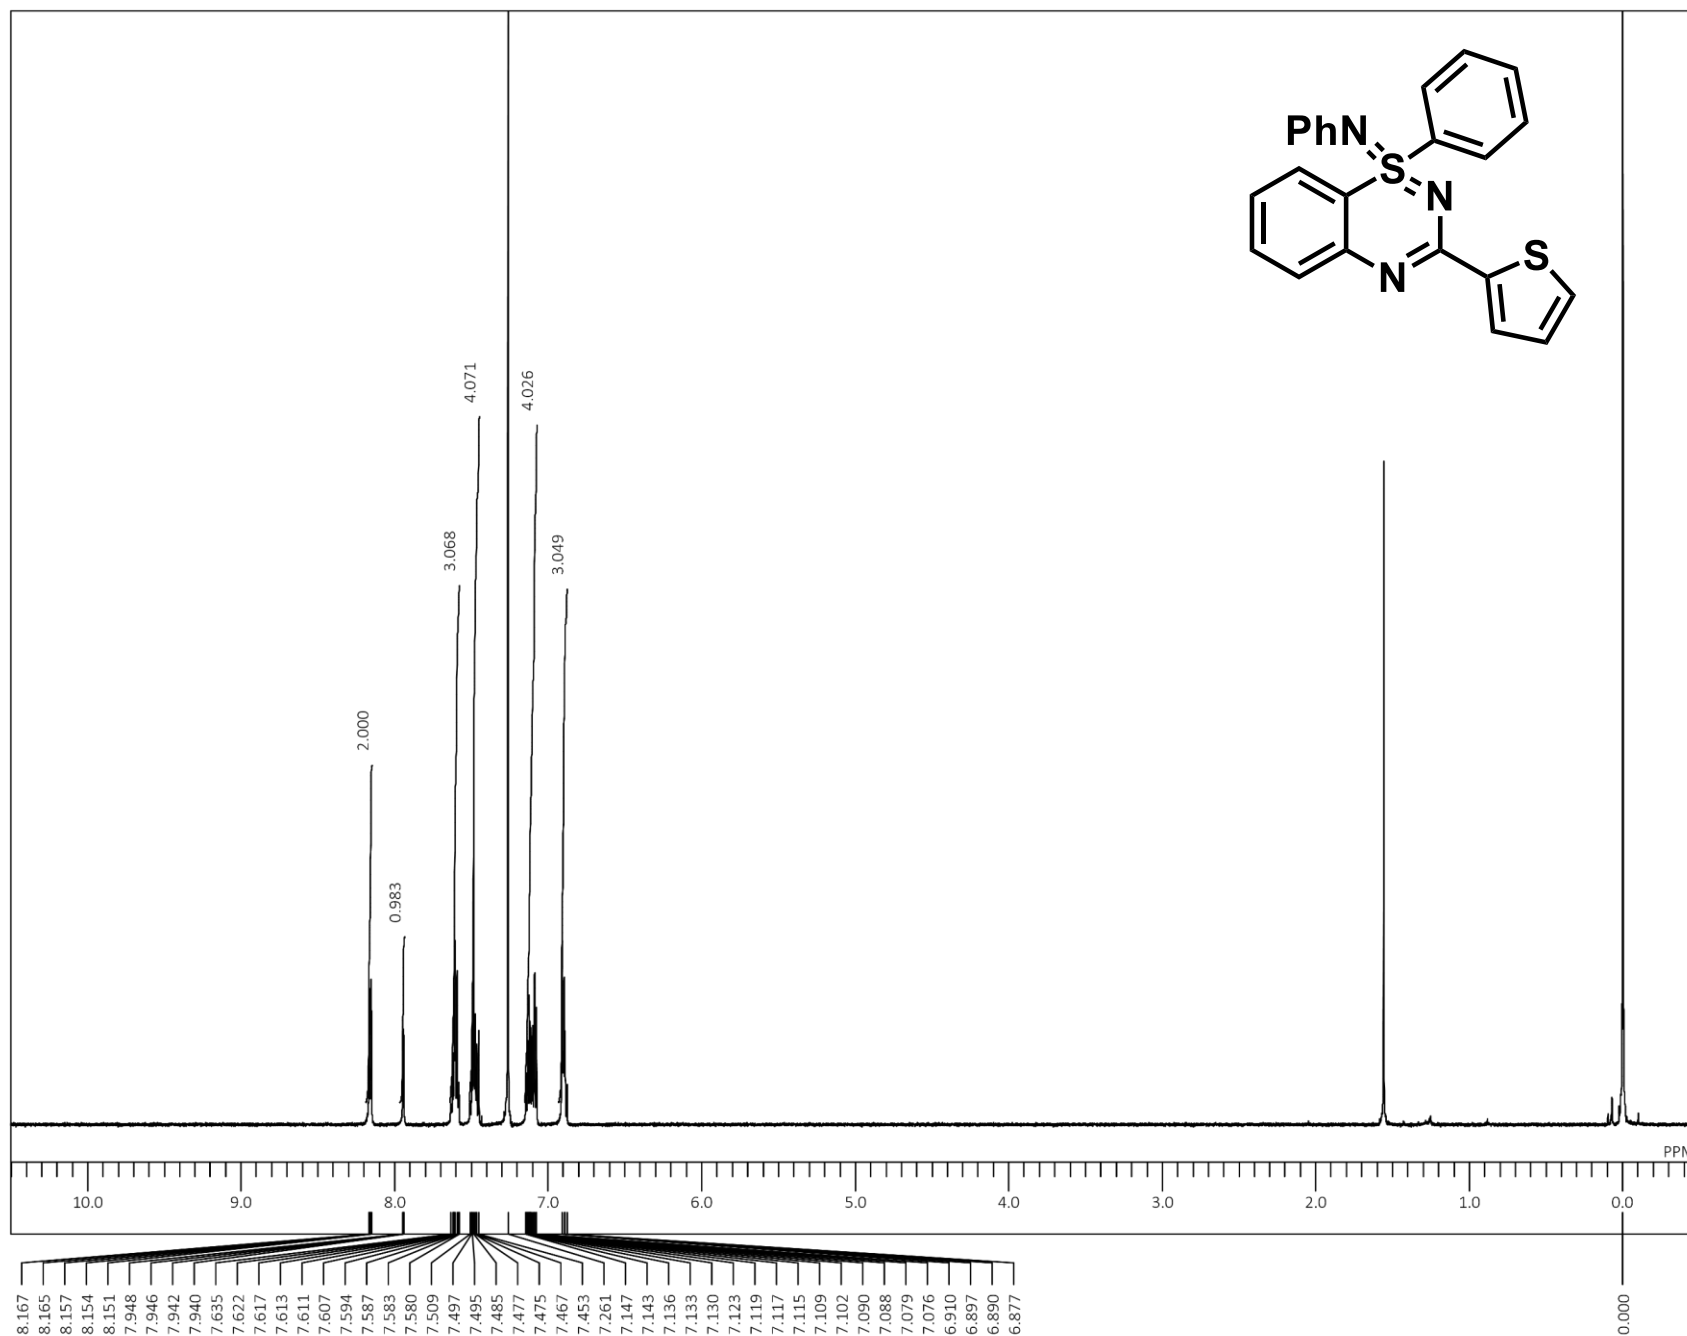

DFILE AM\_dio\_thiophene\_1H-1.als  
COMNT AM\_dio\_thiophen\_1H  
DATIM 2025-01-22 00:39:48  
OBNUC 1H  
EXMOD single\_pulse.ex2  
OBFRQ 600.17 MHz  
OBSET 5.30 KHz  
OBFIN 5.47 Hz  
POINT 26214  
FREQU 9008.87 Hz  
SCANS 8  
ACQTM 2.9098 sec  
PD 10.0000 sec  
PW1 7.00 usec  
IRNUC 1H  
CTEMP 19.6 c  
SLVNT CDCL3  
EXREF 0.00 ppm  
BF 0.12 Hz  
RGAIN 52

# $^{13}\text{C}\{^1\text{H}\}$ NMR (150.92 MHz, $\text{CDCl}_3$ ) spectrum of 3aj

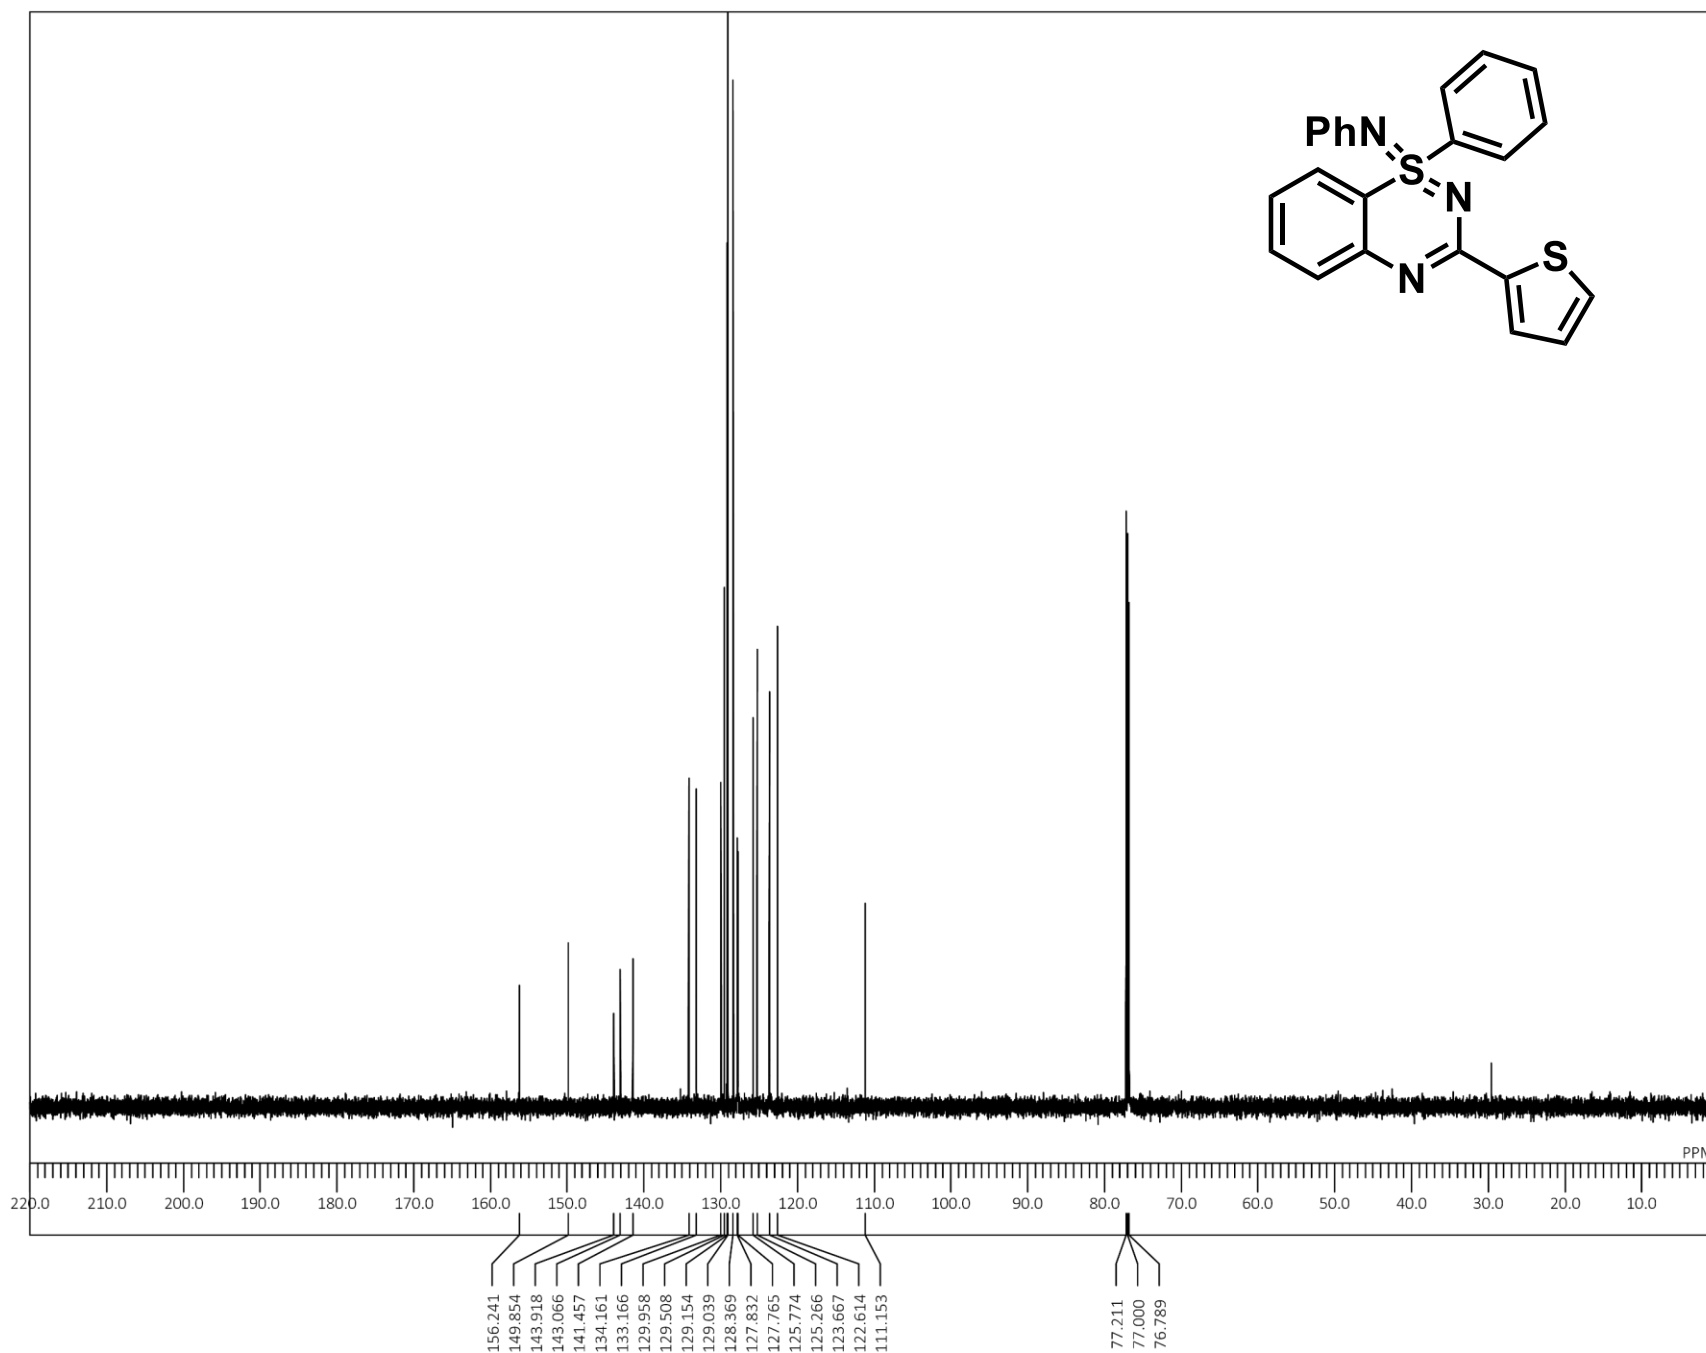

DFILE AM03017\_dio\_thiophene\_13C-1.als  
COMNT AM03017\_dio\_thiophene\_13C  
DATIM 2024-12-24 10:42:21  
OBNUC 13C  
EXMOD single\_pulse\_dec  
OBFRQ 150.92 MHz  
OBSET 8.52 KHz  
OBFIN 1.74 Hz  
POINT 26214  
FREQU 37878.21 Hz  
SCANS 94  
ACQTM 0.6921 sec  
PD 2.0000 sec  
PW1 3.83 usec  
IRNUC 1H  
CTEMP 17.4 c  
SLVNT CDCL3  
EXREF 77.00 ppm  
BF 0.12 Hz  
RGAIN 60

# $^1\text{H}$ NMR (599.67 MHz, $\text{CDCl}_3$ ) spectrum of 3ak

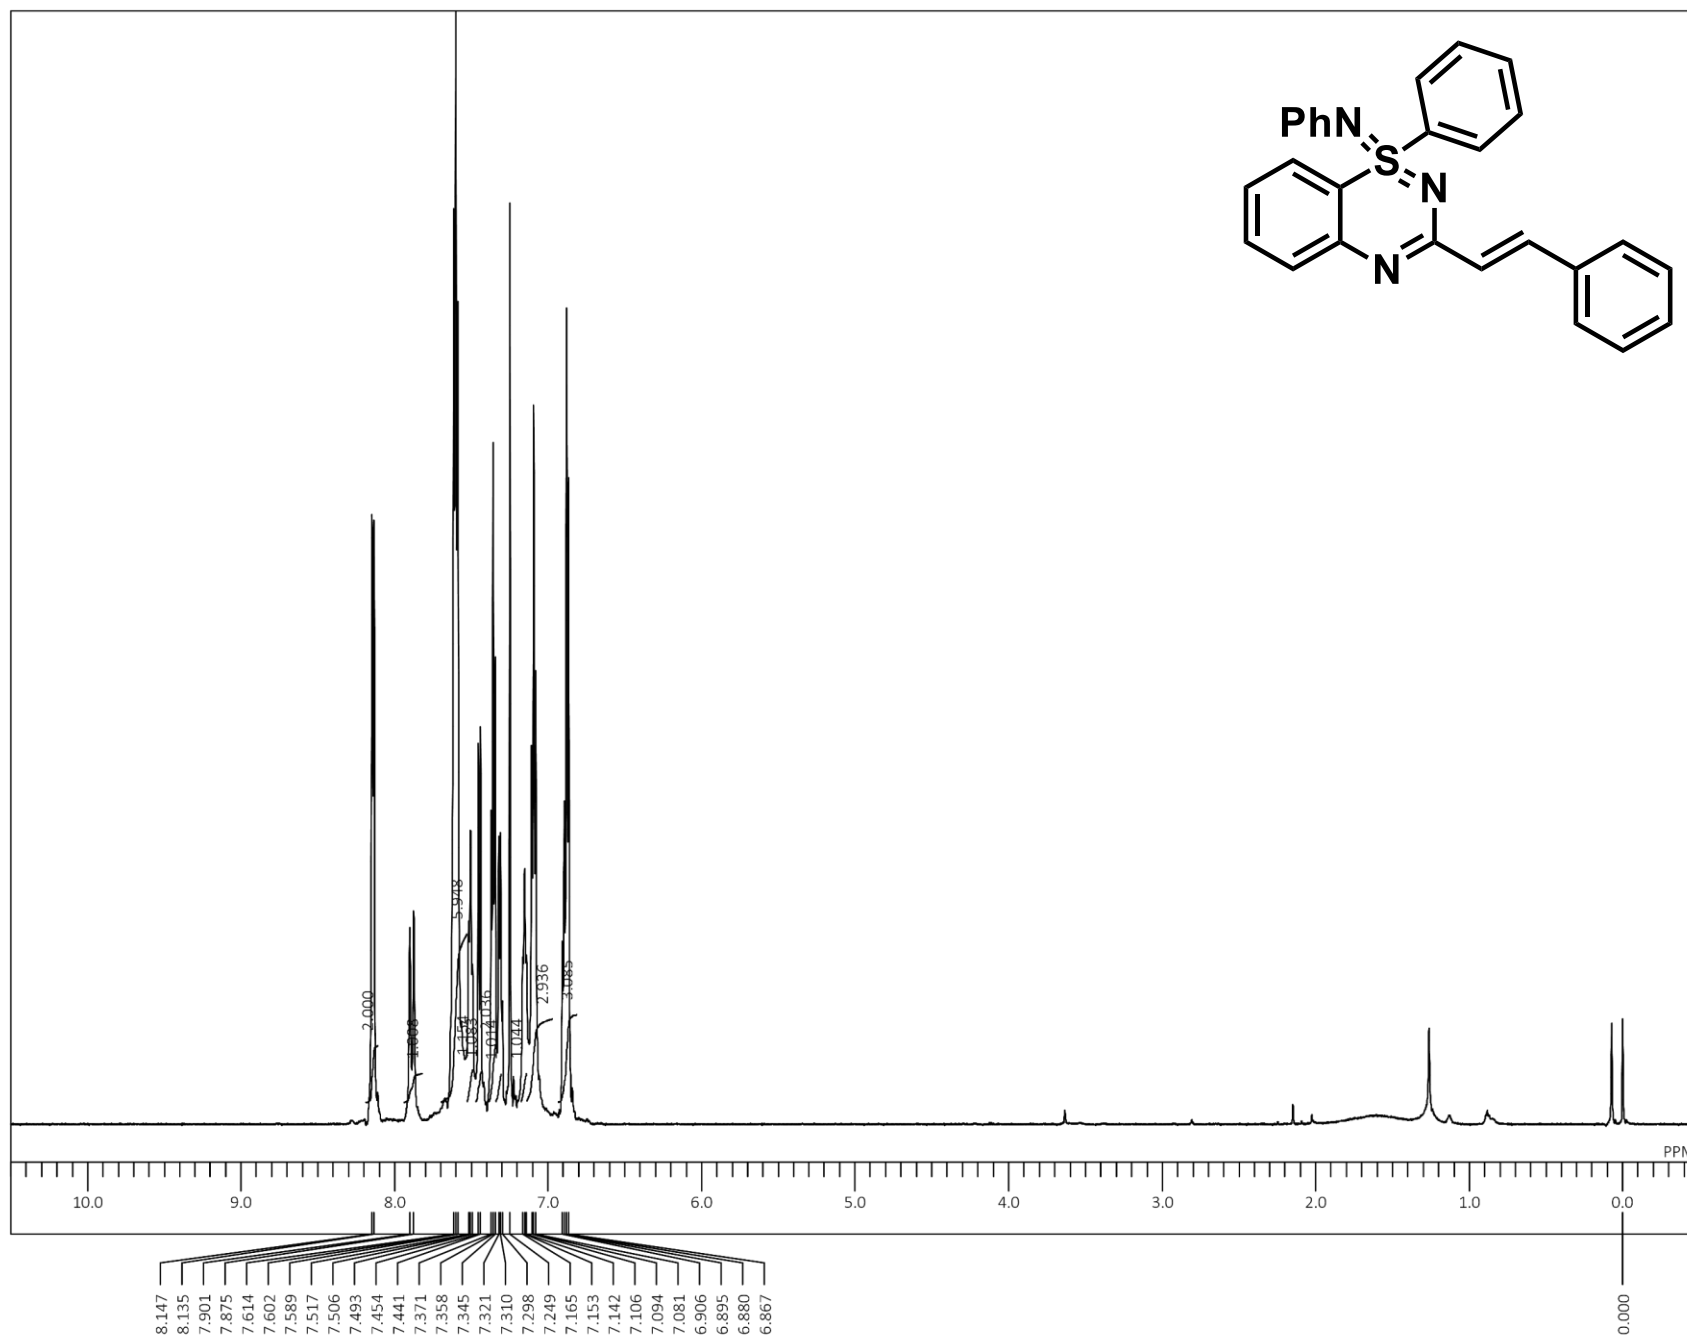

DFILE AM\_dio\_cinnamyl\_1H\_VT\_Proton-1  
COMNT single\_pulse  
DATIM 2025-02-18 17:05:26  
OBNUC 1H  
EXMOD proton.jxp  
OBFRQ 599.67 MHz  
OBSET 5.30 KHz  
OBFIN 3.47 Hz  
POINT 13107  
FREQU 8992.81 Hz  
SCANS 8  
ACQTM 1.4575 sec  
PD 15.0000 sec  
PW1 4.00 usec  
IRNUC 1H  
CTEMP 50.0 c  
SLVNT  $\text{CDCl}_3$   
EXREF 0.00 ppm  
BF 0.12 Hz  
RGAIN 46

# $^{13}\text{C}\{^1\text{H}\}$ NMR (149.41 MHz, $\text{CDCl}_3$ ) spectrum of 3ak

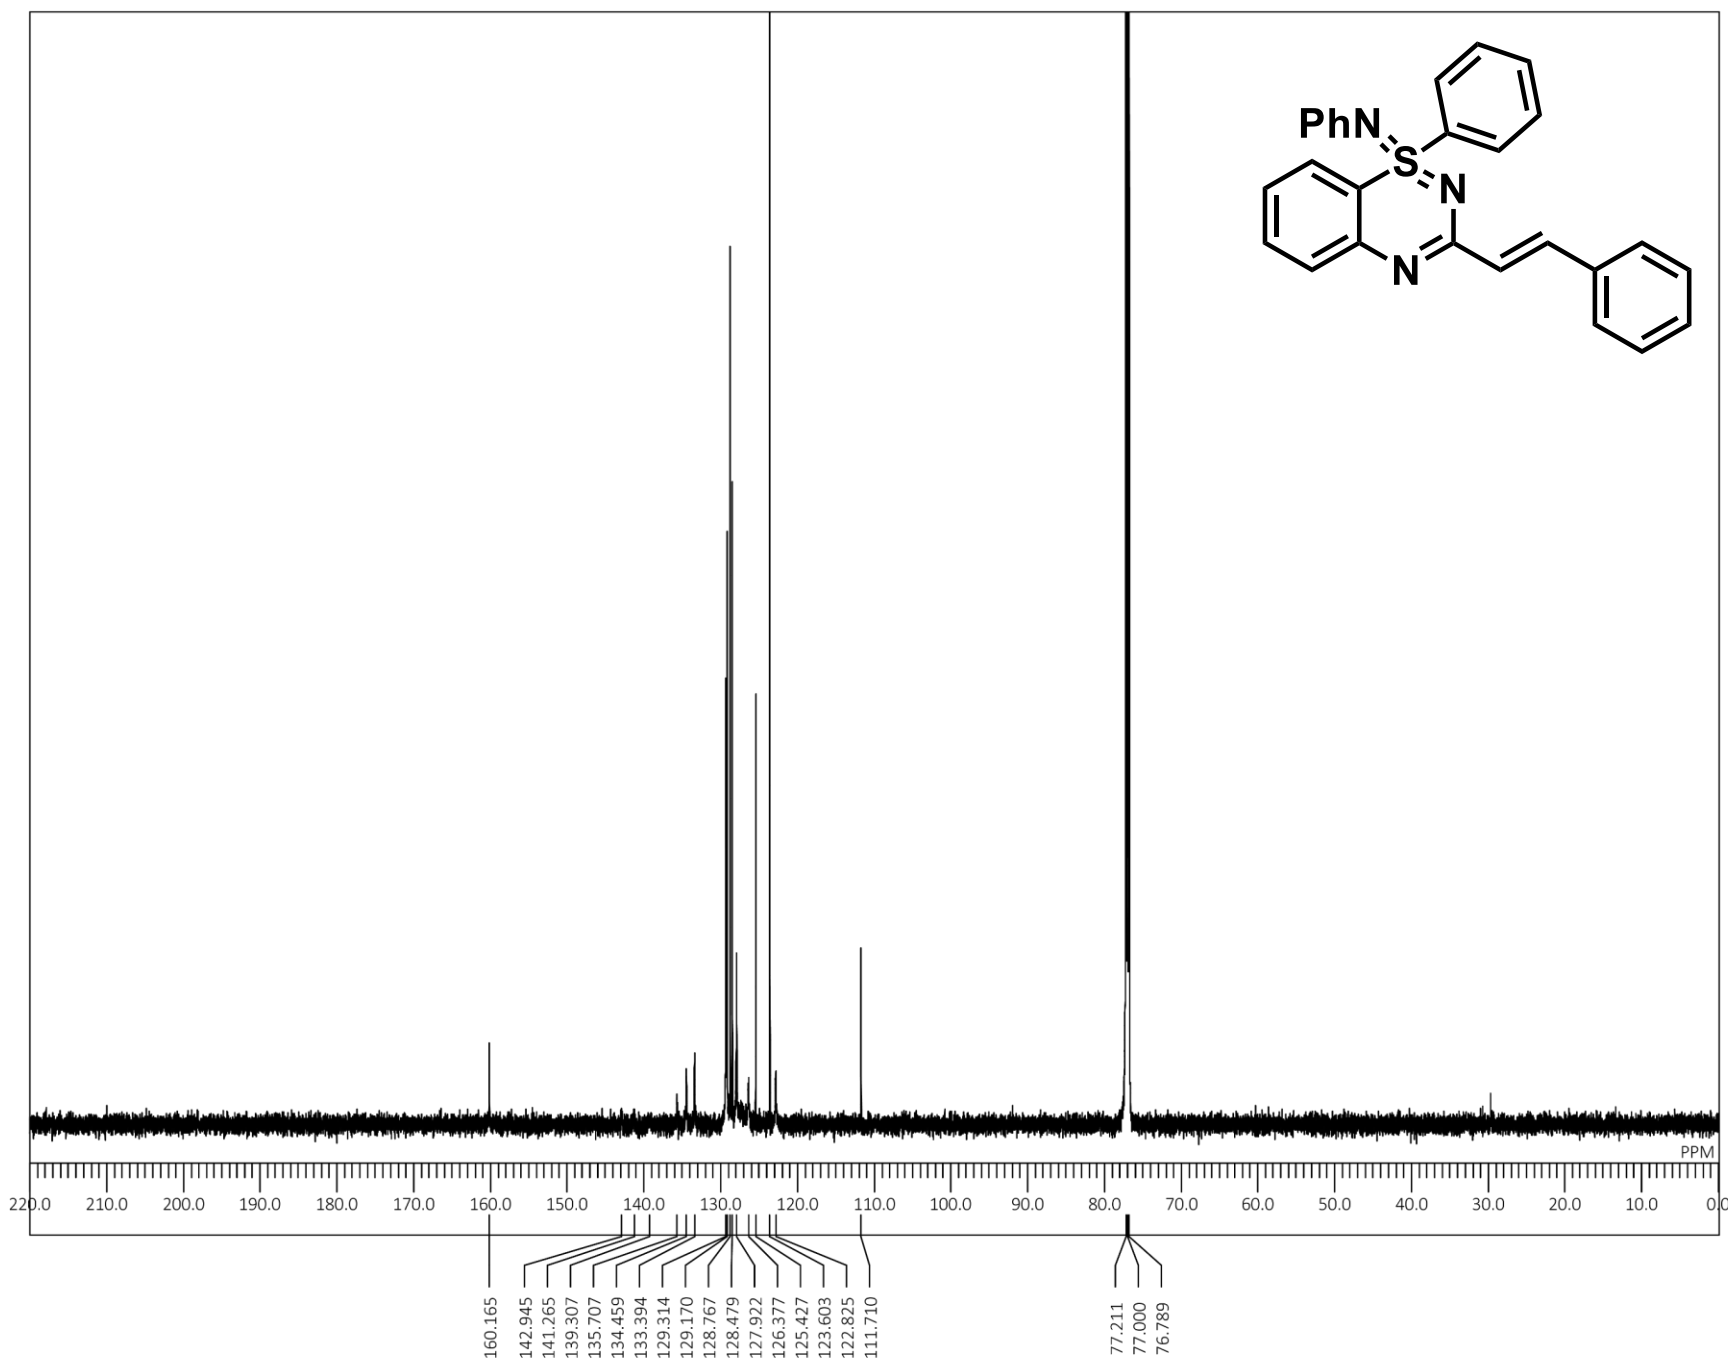

DFILE AM\_dio\_cinnamyl\_13C\_4s\_Carbo  
COMNT single pulse decoupled gated NO  
DATIM 2025-02-20 00:30:06  
OBNUC  $^{13}\text{C}$   
EXMOD carbon.jxp  
OBFRQ 149.41 MHz  
OBSET 9.23 KHz  
OBFIN 6.55 Hz  
POINT 26214  
FREQU 37593.98 Hz  
SCANS 7200  
ACQTM 0.6973 sec  
PD 4.0000 sec  
PW1 3.20 usec  
IRNUC  $^1\text{H}$   
CTEMP 15.8 c  
SLVNT  $\text{CDCl}_3$   
EXREF 77.00 ppm  
BF 0.12 Hz  
RGAIN 60

# <sup>1</sup>H NMR (600.17 MHz, CDCl<sub>3</sub>) spectrum of 3a

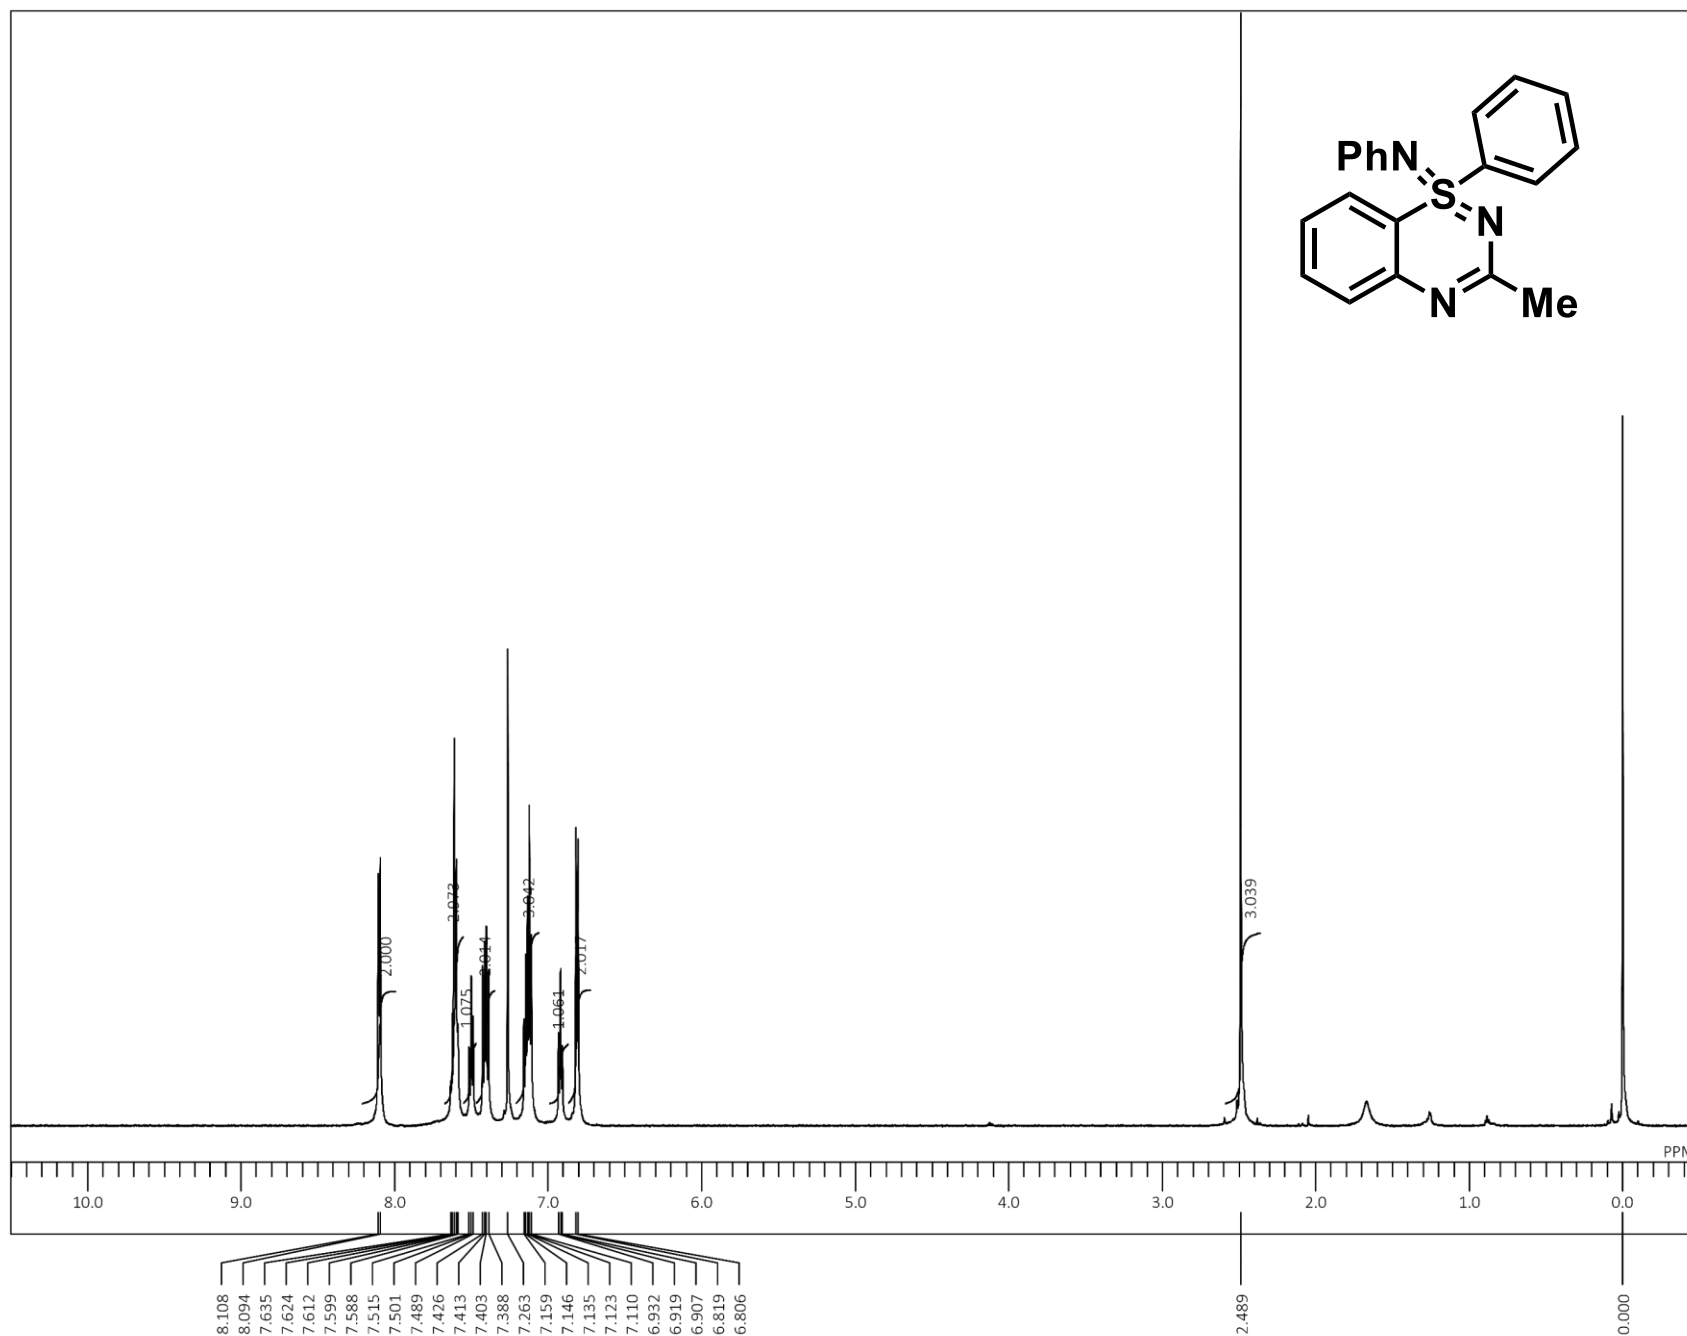

DFILE AM\_dio\_Me\_1H-1.als  
COMNT AM\_dio\_Me\_1H  
DATIM 2025-01-22 03:03:51  
OBNUC 1H  
EXMOD single\_pulse.ex2  
OBFRQ 600.17 MHz  
OBSET 5.30 KHz  
OBFIN 5.47 Hz  
POINT 26214  
FREQU 9008.87 Hz  
SCANS 8  
ACQTM 2.9098 sec  
PD 10.0000 sec  
PW1 7.00 usec  
IRNUC 1H  
CTEMP 19.4 c  
SLVNT CDCL3  
EXREF 0.00 ppm  
BF 0.52 Hz  
RGAIN 52

# $^{13}\text{C}\{^1\text{H}\}$ NMR (150.92 MHz, $\text{CDCl}_3$ ) spectrum of 3a

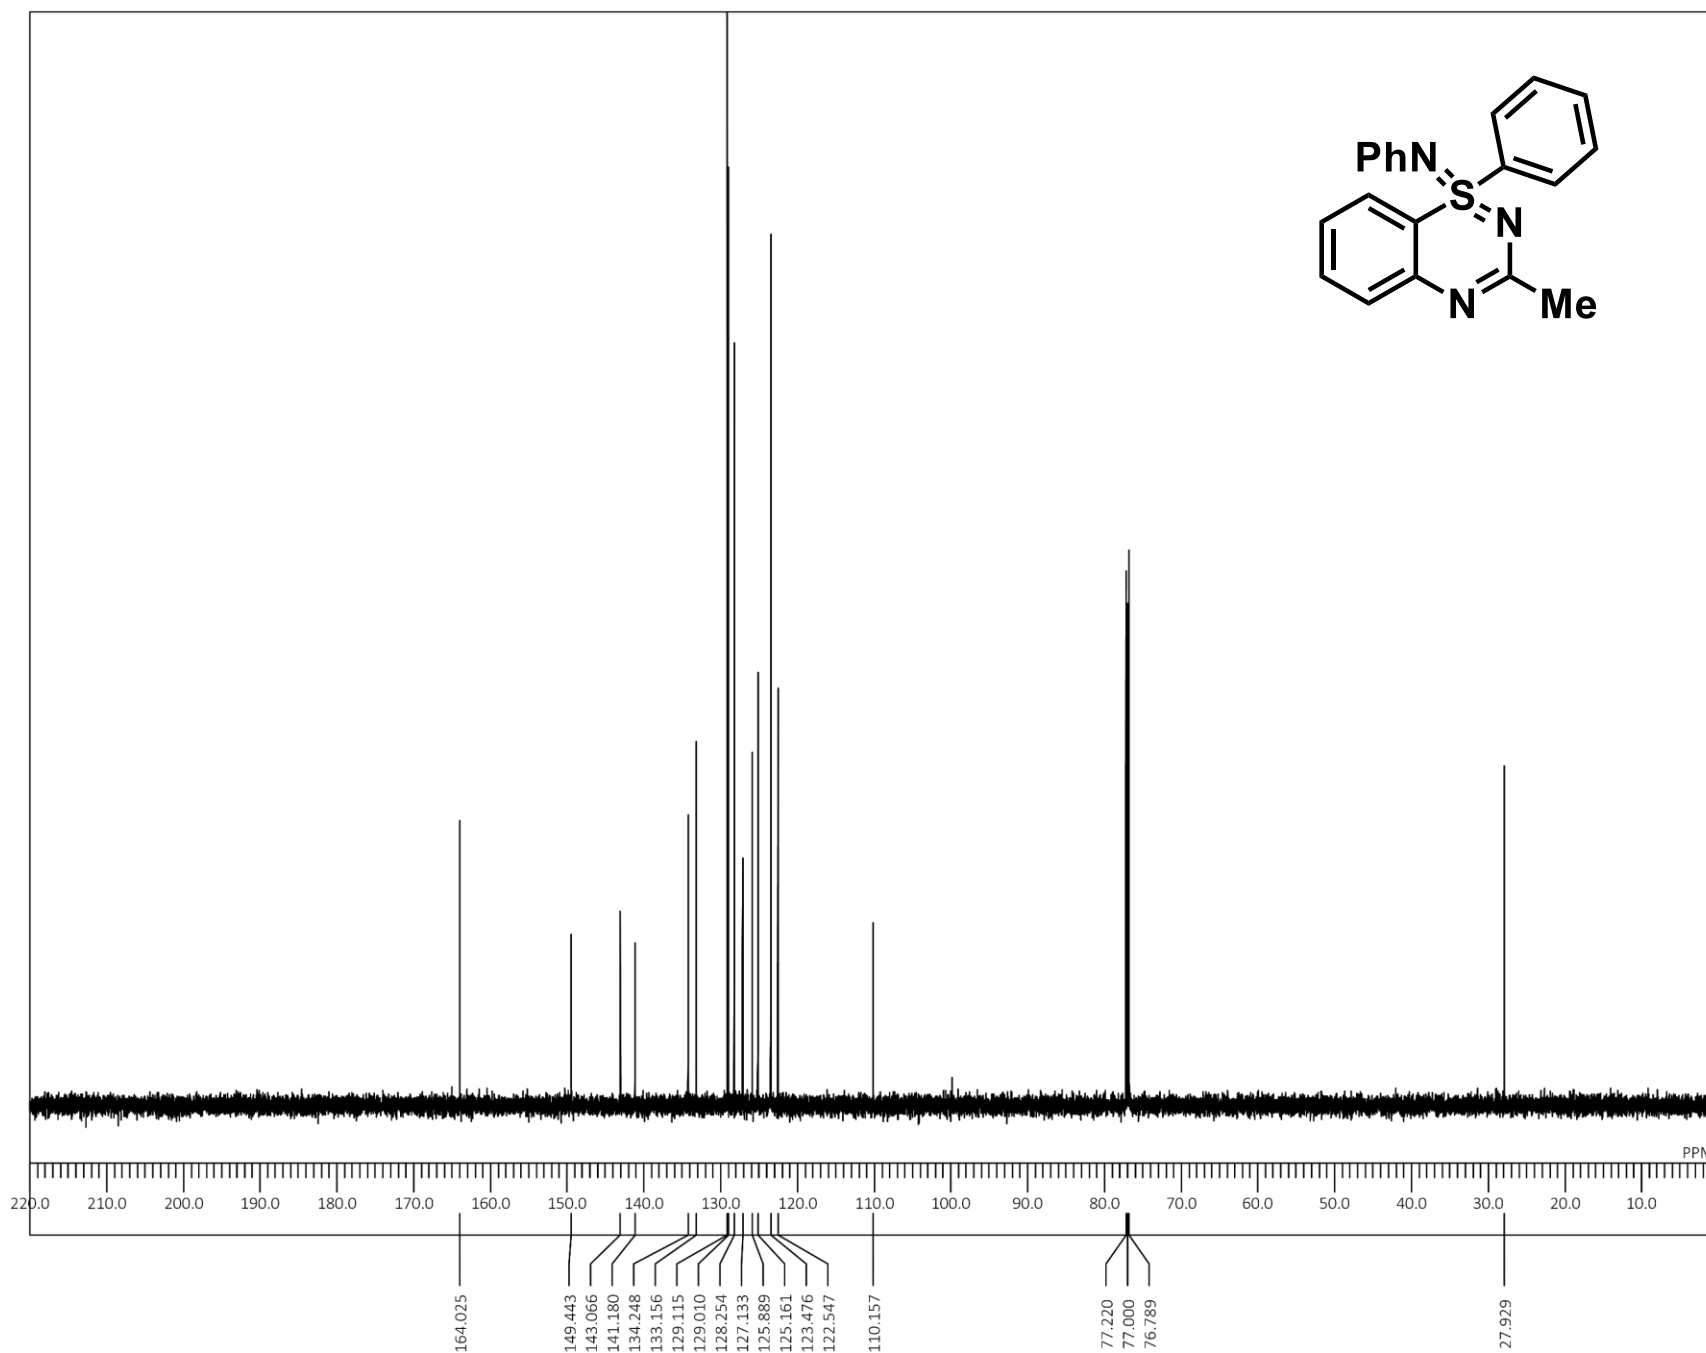

DFILE AM03007\_dio\_Me\_column\_13C-1.a  
COMNT AM03007\_dio\_Me\_column\_13C  
DATIM 2024-12-20 12:53:20  
OBNUC 13C  
EXMOD single\_pulse\_dec  
OBFRQ 150.92 MHz  
OBSET 8.52 KHz  
OBFIN 1.74 Hz  
POINT 26214  
FREQU 37878.21 Hz  
SCANS 65  
ACQTM 0.6921 sec  
PD 2.0000 sec  
PW1 3.83 usec  
IRNUC 1H  
CTEMP 16.7 c  
SLVNT CDCL3  
EXREF 77.00 ppm  
BF 0.20 Hz  
RGAIN 60



# <sup>1</sup>H NMR (600.17 MHz, CDCl<sub>3</sub>) spectrum of 3bb

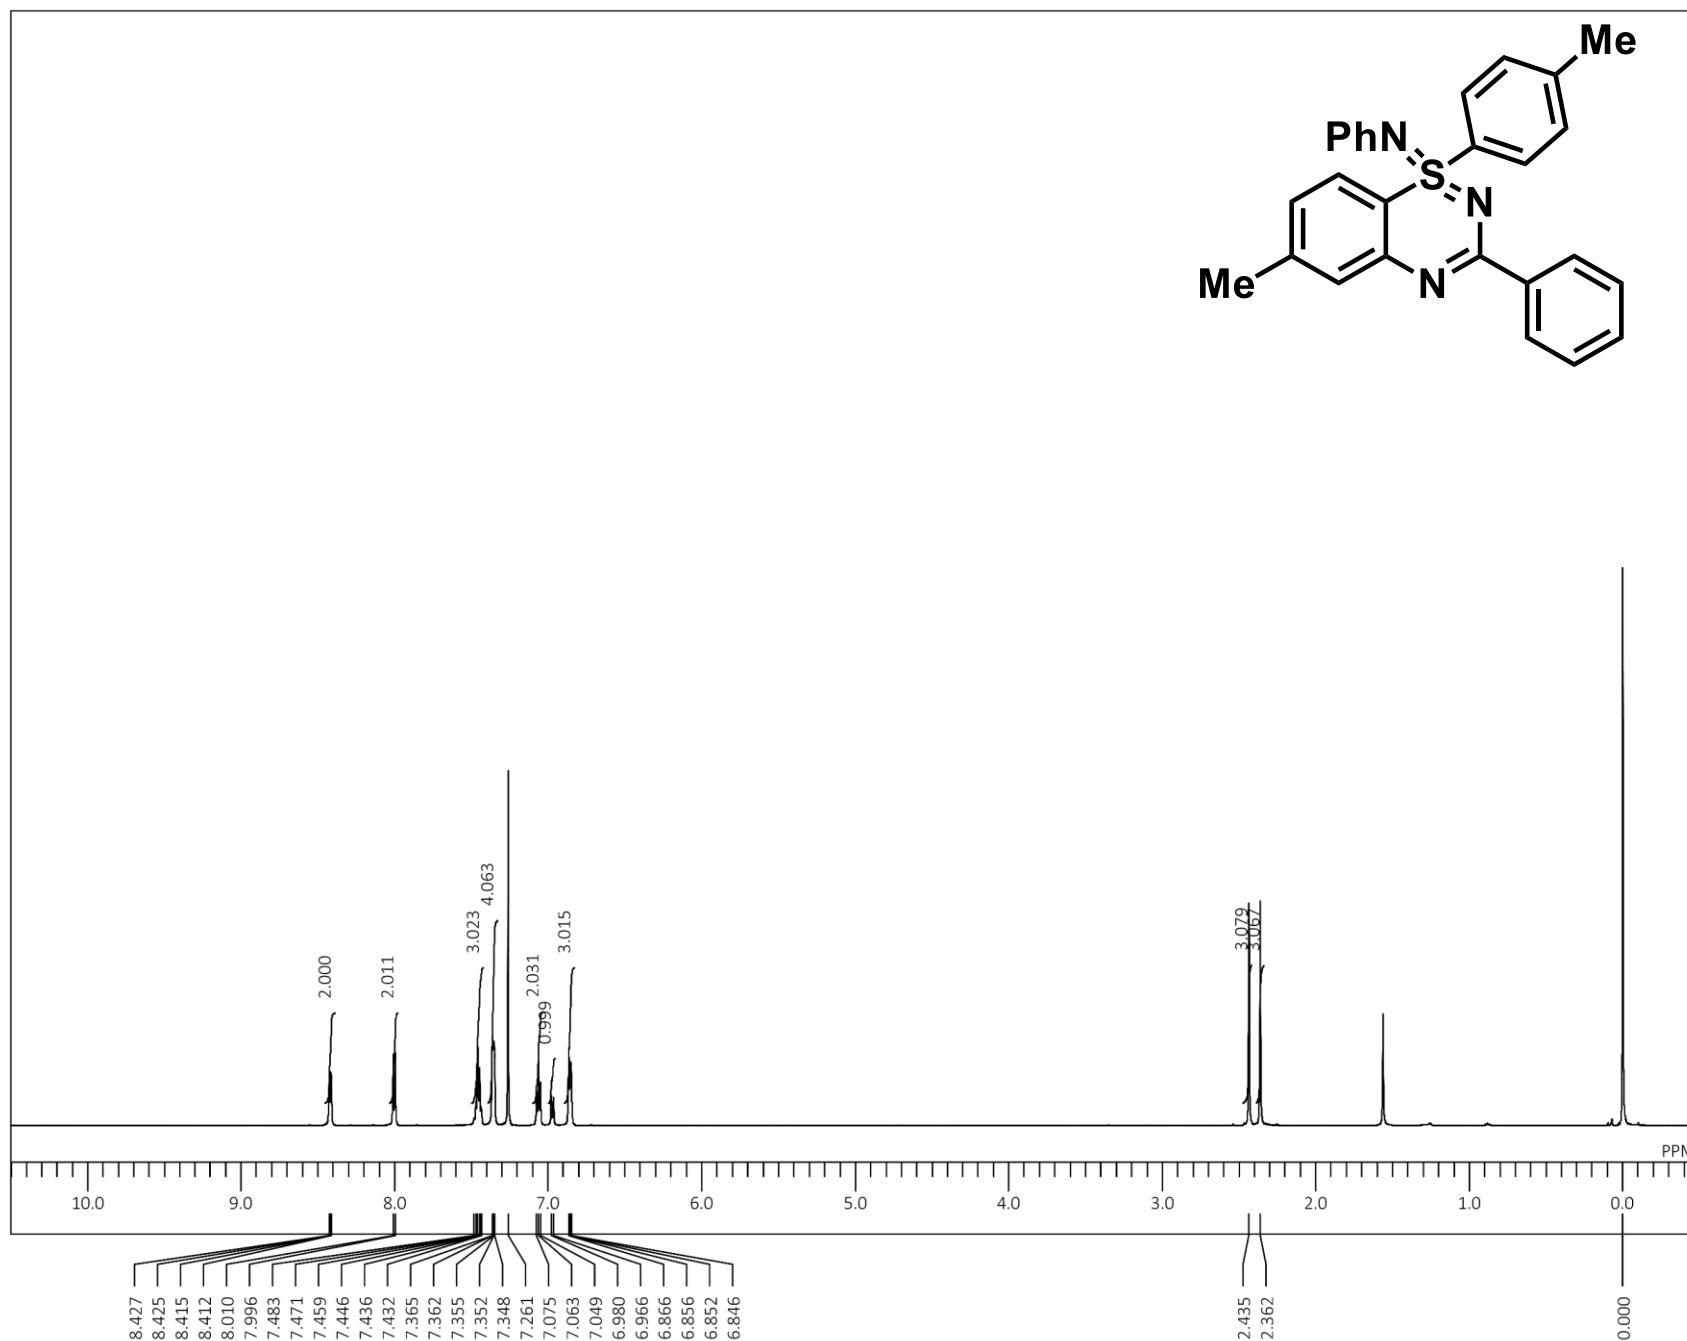

DFILE AM\_sul\_pMe\_1H-1.als  
COMNT AM\_sul\_pMe\_1H  
DATIM 2025-01-22 02:18:36  
OBNUC 1H  
EXMOD single\_pulse.ex2  
OBFRQ 600.17 MHz  
OBSET 5.30 KHz  
OBFIN 5.47 Hz  
POINT 26214  
FREQU 9008.87 Hz  
SCANS 8  
ACQTM 2.9098 sec  
PD 10.0000 sec  
PW1 7.00 usec  
IRNUC 1H  
CTEMP 19.3 c  
SLVNT CDCL3  
EXREF 0.00 ppm  
BF 1.02 Hz  
RGAIN 50

# $^{13}\text{C}\{^1\text{H}\}$ NMR (150.92 MHz, $\text{CDCl}_3$ ) spectrum of 3bb

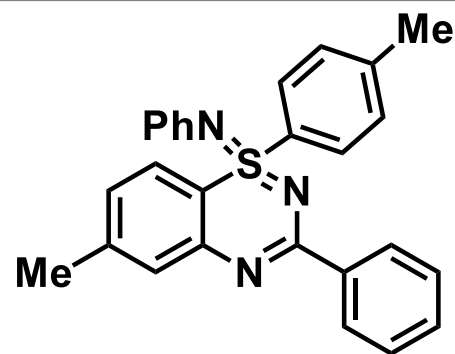

DFILE AM03009\_sul\_pMe\_13C-1.als  
COMNT AM03009\_sul\_pMe\_13C  
DATIM 2024-12-19 00:19:49  
OBNUC 13C  
EXMOD single\_pulse\_dec  
OBFRQ 150.92 MHz  
OBSET 8.52 KHz  
OBFIN 1.74 Hz  
POINT 26214  
FREQU 37878.21 Hz  
SCANS 316  
ACQTM 0.6921 sec  
PD 2.0000 sec  
PW1 3.83 usec  
IRNUC 1H  
CTEMP 17.5 c  
SLVNT CDCL3  
EXREF 77.00 ppm  
BF 0.20 Hz  
RGAIN 60

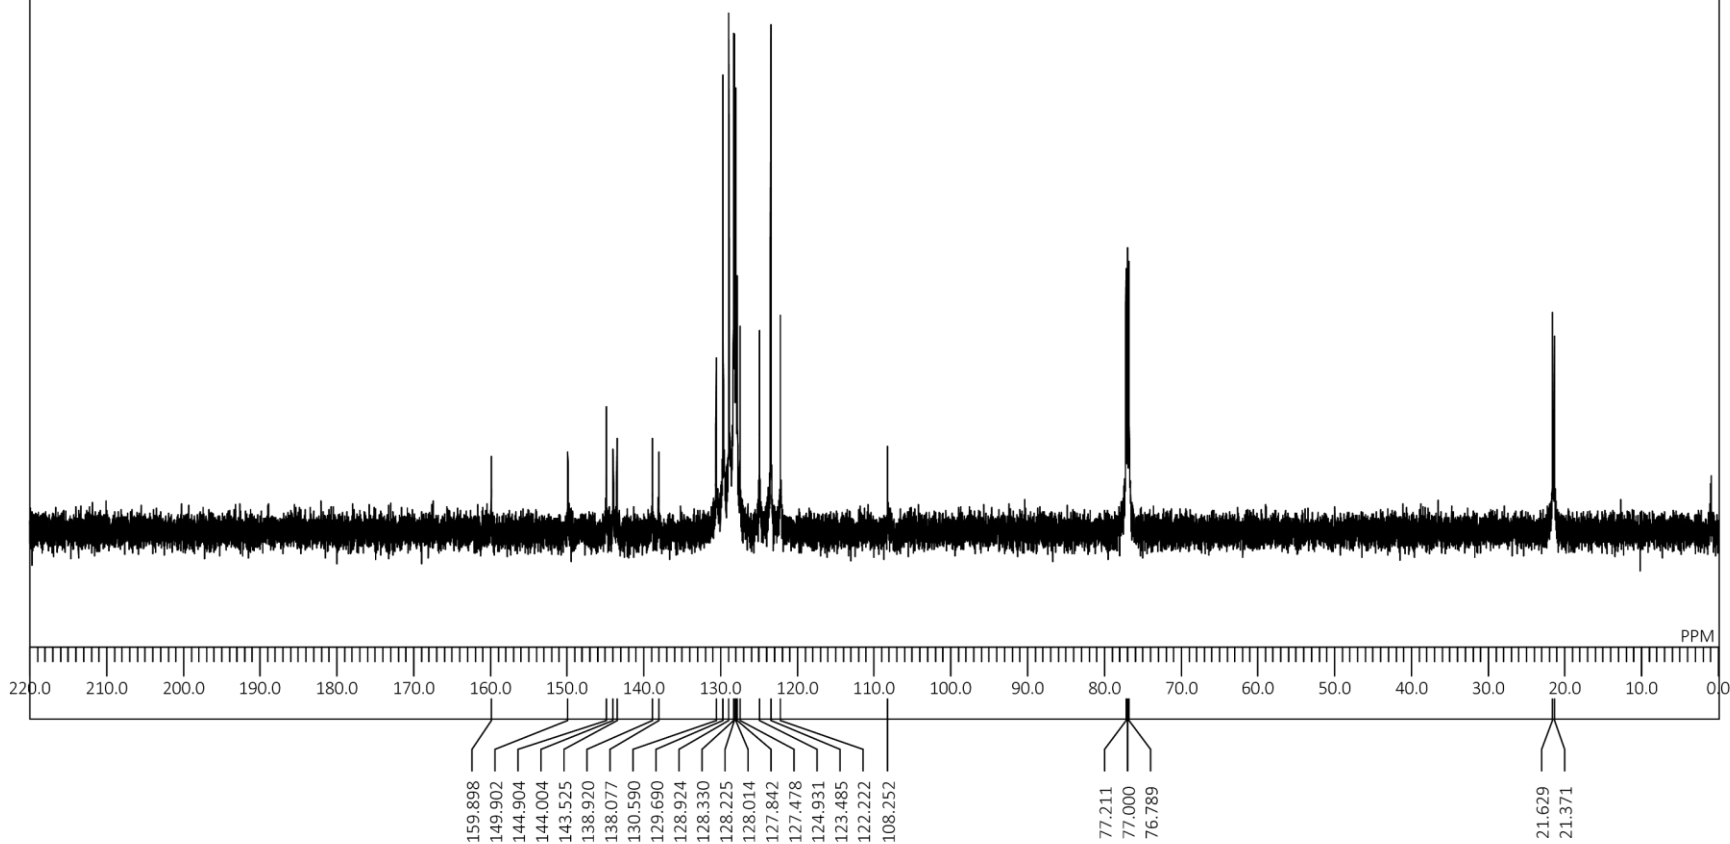

# $^1\text{H}$ NMR (600.17 MHz, $\text{CDCl}_3$ ) spectrum of 3cb

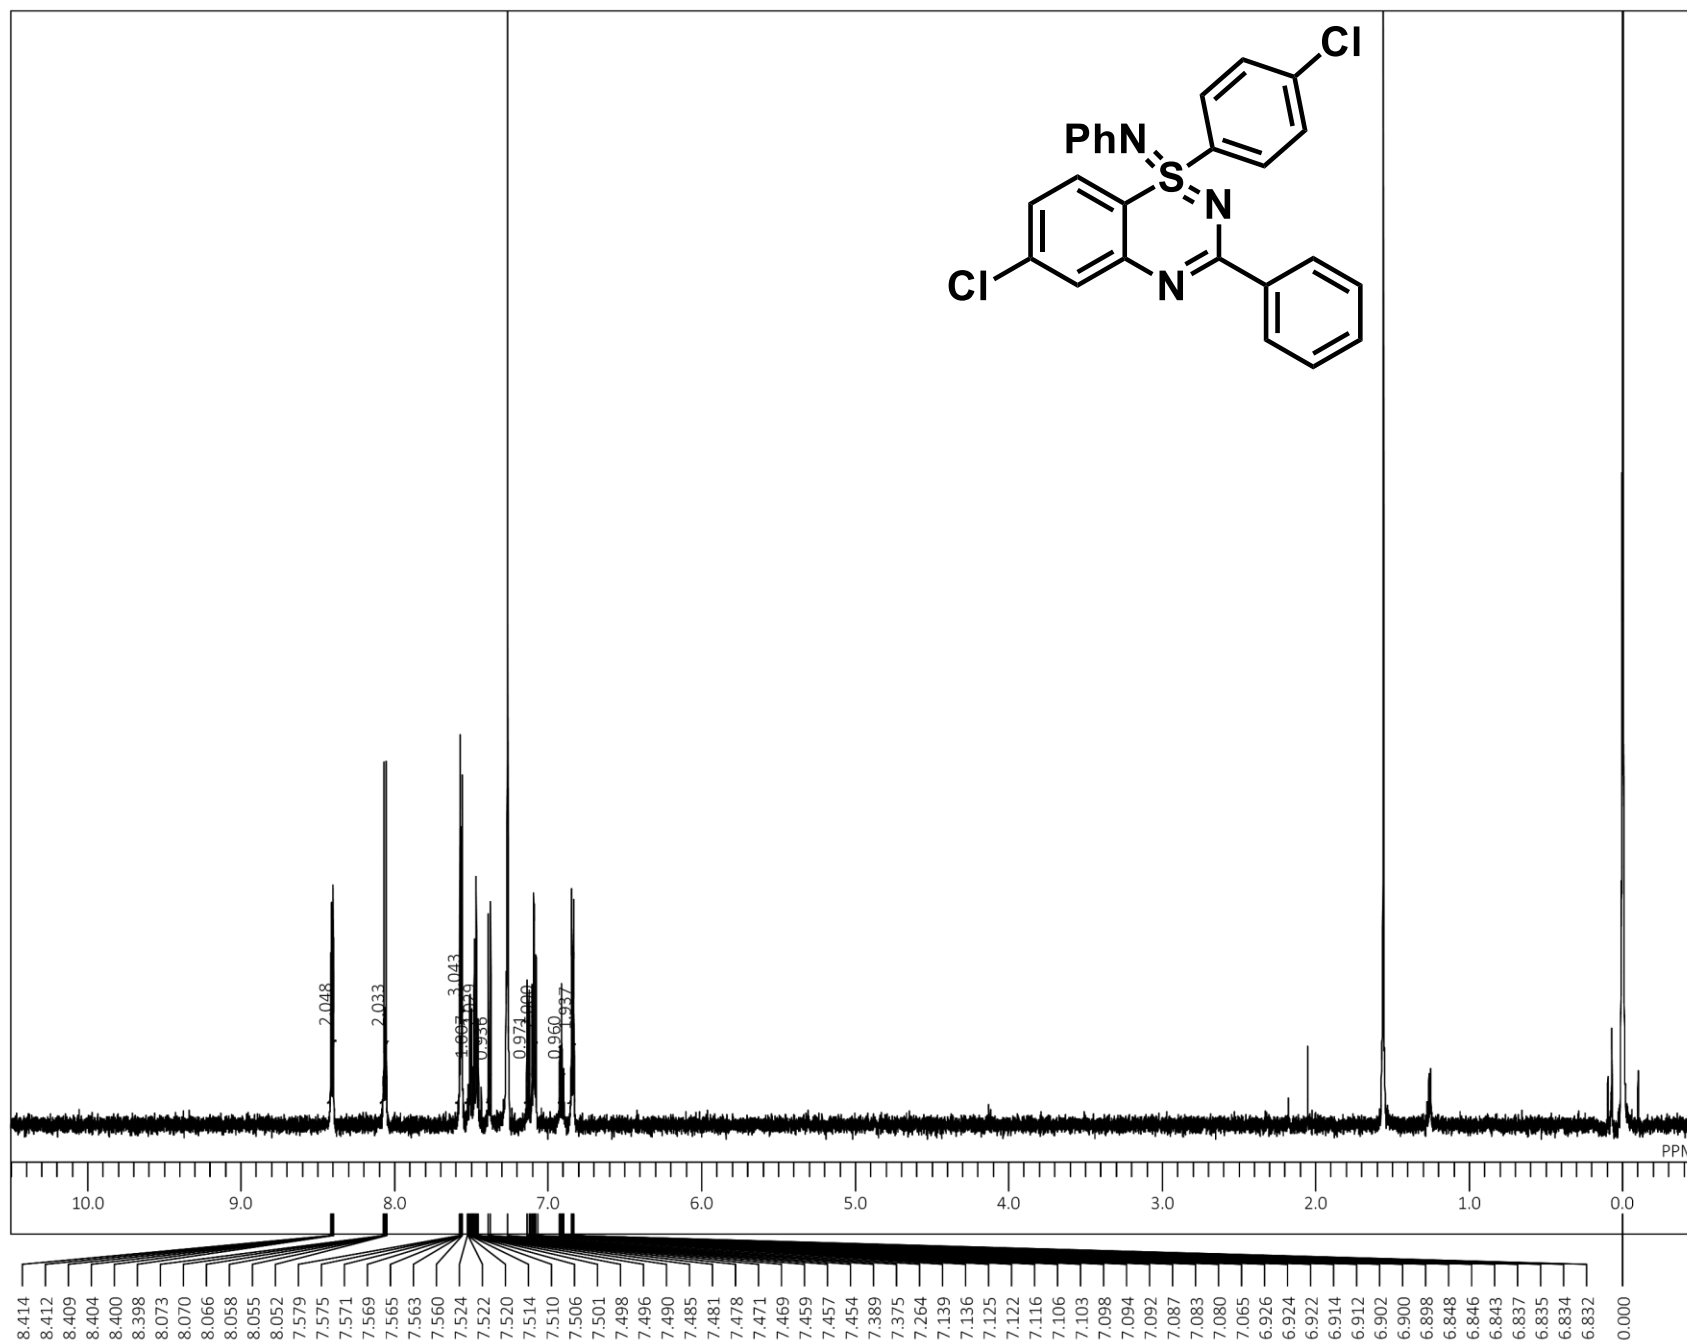

DFILE AM03009\_sul\_pCl\_1H.als  
COMNT AM03009\_sul\_pCl\_column  
DATIM 2024-12-17 12:06:43  
OBNUC 1H  
EXMOD single\_pulse.ex2  
OBFRQ 600.17 MHz  
OBSET 5.30 KHz  
OBFIN 5.47 Hz  
POINT 26214  
FREQU 9008.87 Hz  
SCANS 8  
ACQTM 2.9098 sec  
PD 5.0000 sec  
PW1 7.00 usec  
IRNUC 1H  
CTEMP 16.8 c  
SLVNT CDCL3  
EXREF 0.00 ppm  
BF 0.02 Hz  
RGAIN 52

# $^{13}\text{C}\{^1\text{H}\}$ NMR (150.92 MHz, $\text{CDCl}_3$ ) spectrum of 3cb

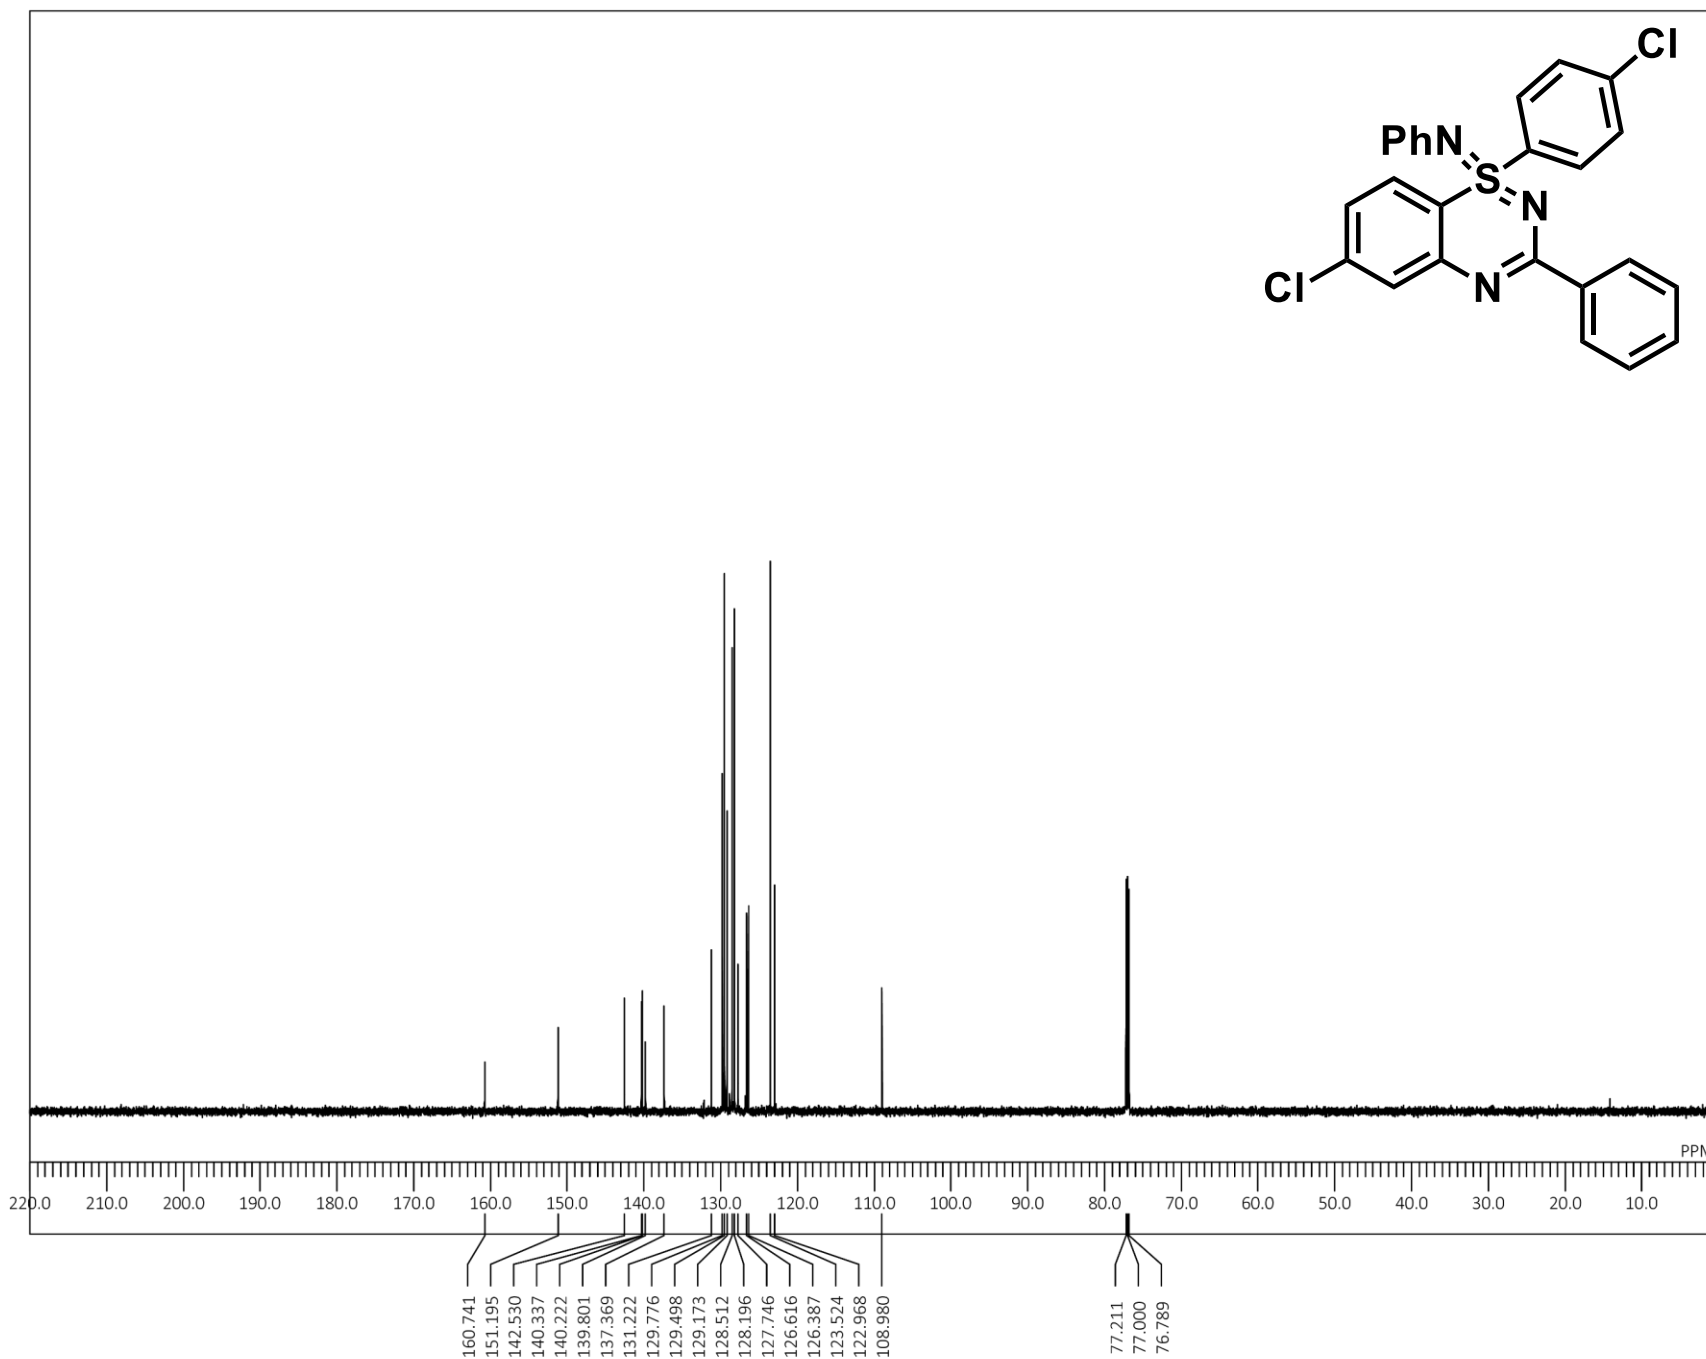

DFILE AM03009\_sul\_pCl\_13C-1.als  
COMNT AM03009\_sul\_pCl\_13C  
DATIM 2024-12-18 22:28:24  
OBNUC 13C  
EXMOD single\_pulse\_dec  
OBFRQ 150.92 MHz  
OBSET 8.52 KHz  
OBFIN 1.74 Hz  
POINT 26214  
FREQU 37878.21 Hz  
SCANS 108  
ACQTM 0.6921 sec  
PD 2.0000 sec  
PW1 3.83 usec  
IRNUC 1H  
CTEMP 17.5 c  
SLVNT CDCL3  
EXREF 77.00 ppm  
BF 0.20 Hz  
RGAIN 60

# <sup>1</sup>H NMR (600.17 MHz, CDCl<sub>3</sub>) spectrum of 3db

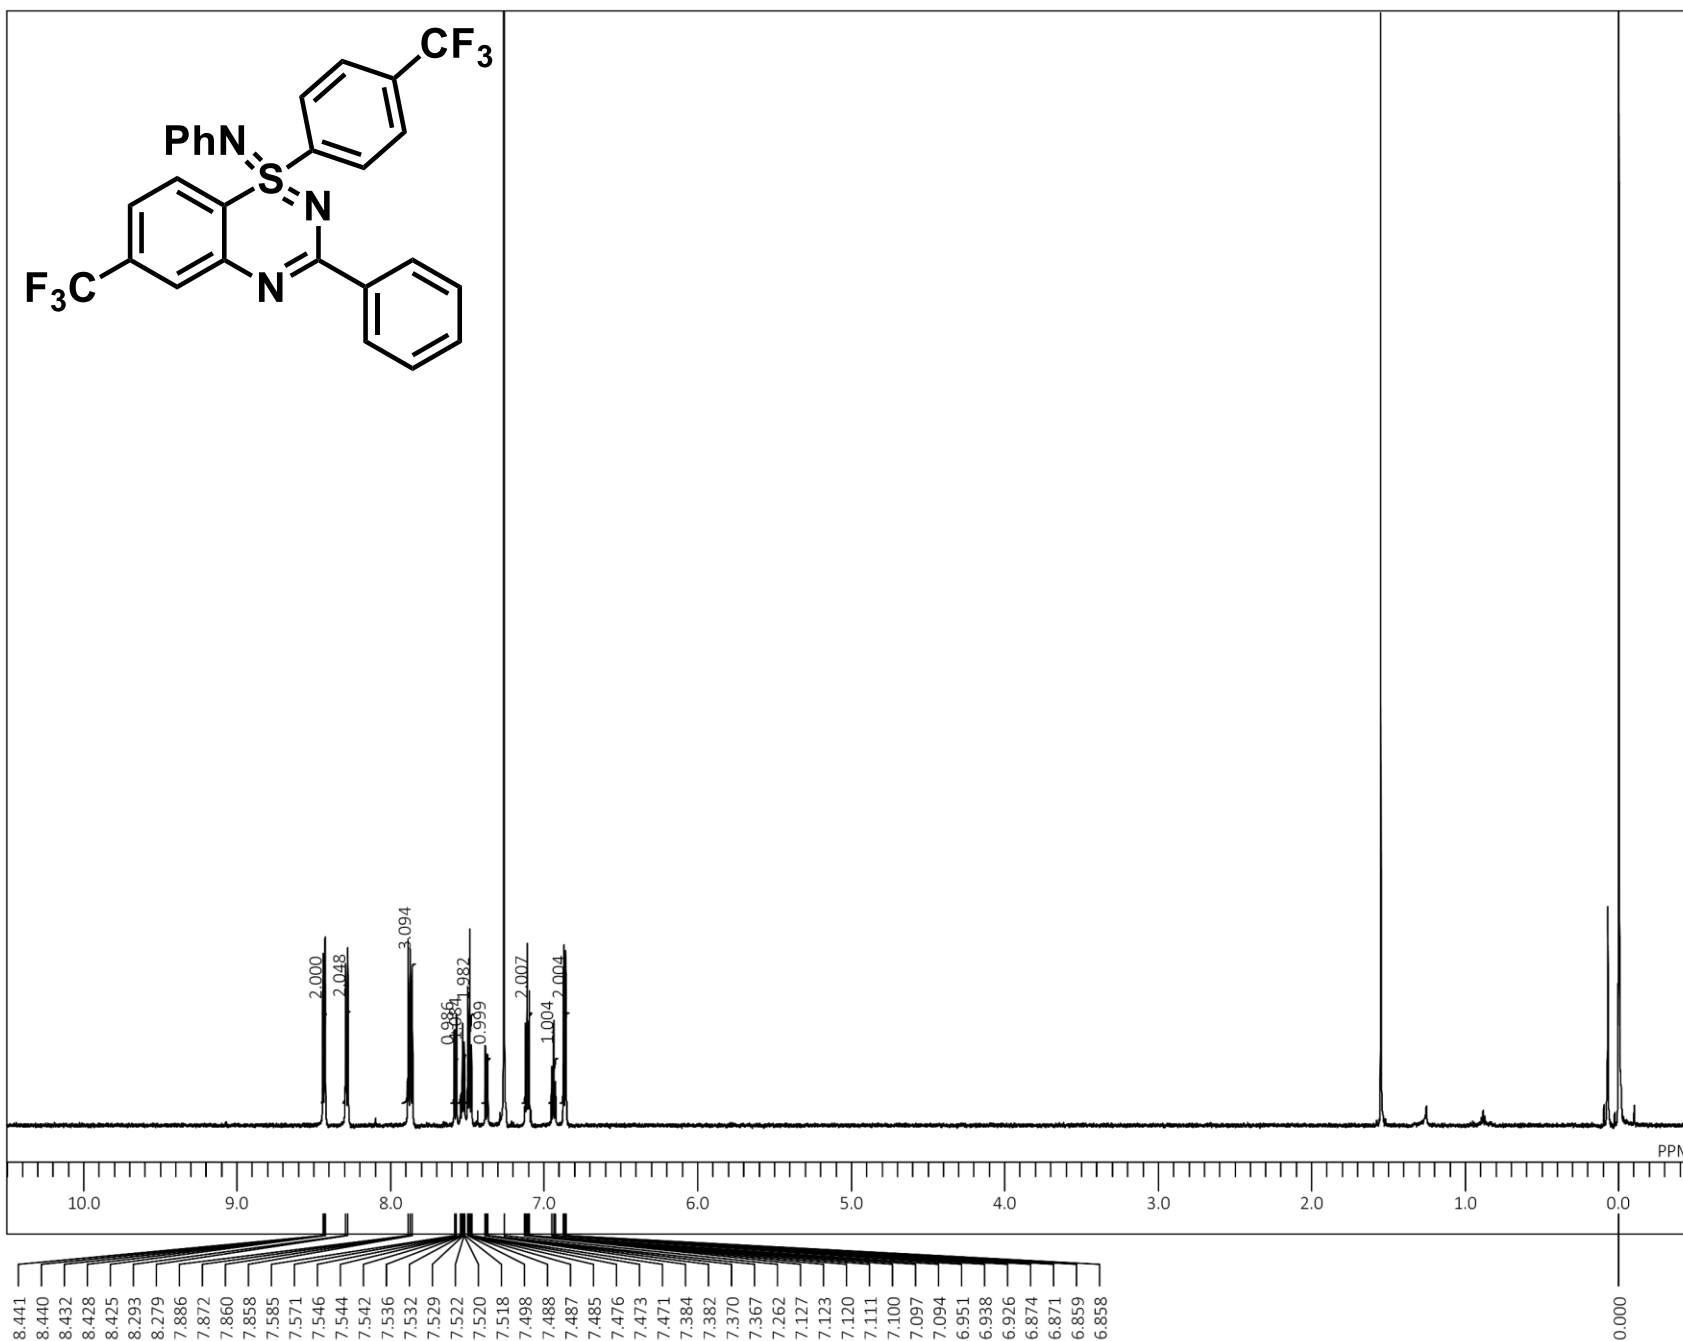

DFILE AM\_sul\_pCF3\_1H-3.als  
COMNT AM\_sul\_pCF3\_1H\_2  
DATIM 2025-01-21 23:59:53  
OBNUC 1H  
EXMOD single\_pulse.ex2  
OBFRQ 600.17 MHz  
OBSET 5.30 KHz  
OBFIN 5.47 Hz  
POINT 26214  
FREQU 9008.87 Hz  
SCANS 8  
ACQTM 2.9098 sec  
PD 10.0000 sec  
PW1 7.00 usec  
IRNUC 1H  
CTEMP 19.7 c  
SLVNT CDCL3  
EXREF 0.00 ppm  
BF 0.22 Hz  
RGAIN 52

# $^{13}\text{C}\{^1\text{H}\}$ NMR (150.92 MHz, $\text{CDCl}_3$ ) spectrum of 3db

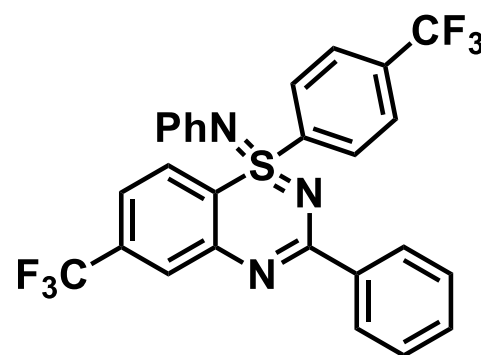

DFILE AM03009\_sul\_pCF3\_13C\_2-1.als  
COMNT AM03009\_sul\_pCF3\_13C\_2  
DATIM 2024-12-25 00:14:17  
OBNUC 13C  
EXMOD single\_pulse\_dec  
OBFRQ 150.92 MHz  
OBSET 8.52 KHz  
OBFIN 1.74 Hz  
POINT 26214  
FREQU 37878.21 Hz  
SCANS 180  
ACQTM 0.6921 sec  
PD 2.0000 sec  
PW1 3.83 usec  
IRNUC 1H  
CTEMP 17.4 c  
SLVNT CDCL3  
EXREF 77.00 ppm  
BF 2.00 Hz  
RGAIN 60

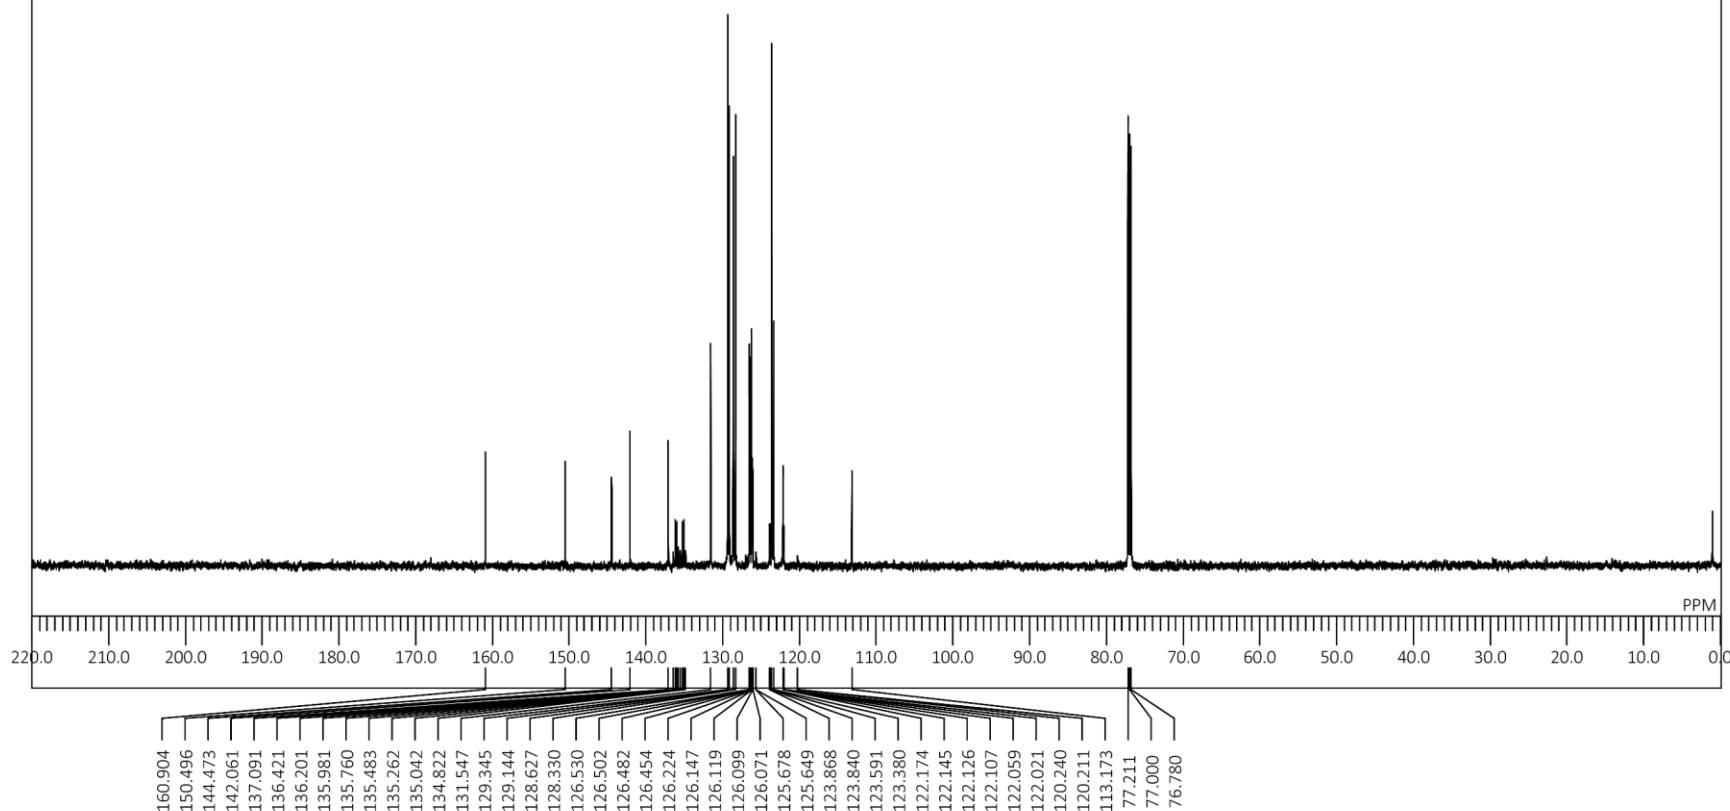

# $^{19}\text{F}$ NMR (564.67 MHz, $\text{CDCl}_3$ ) spectrum of 3db

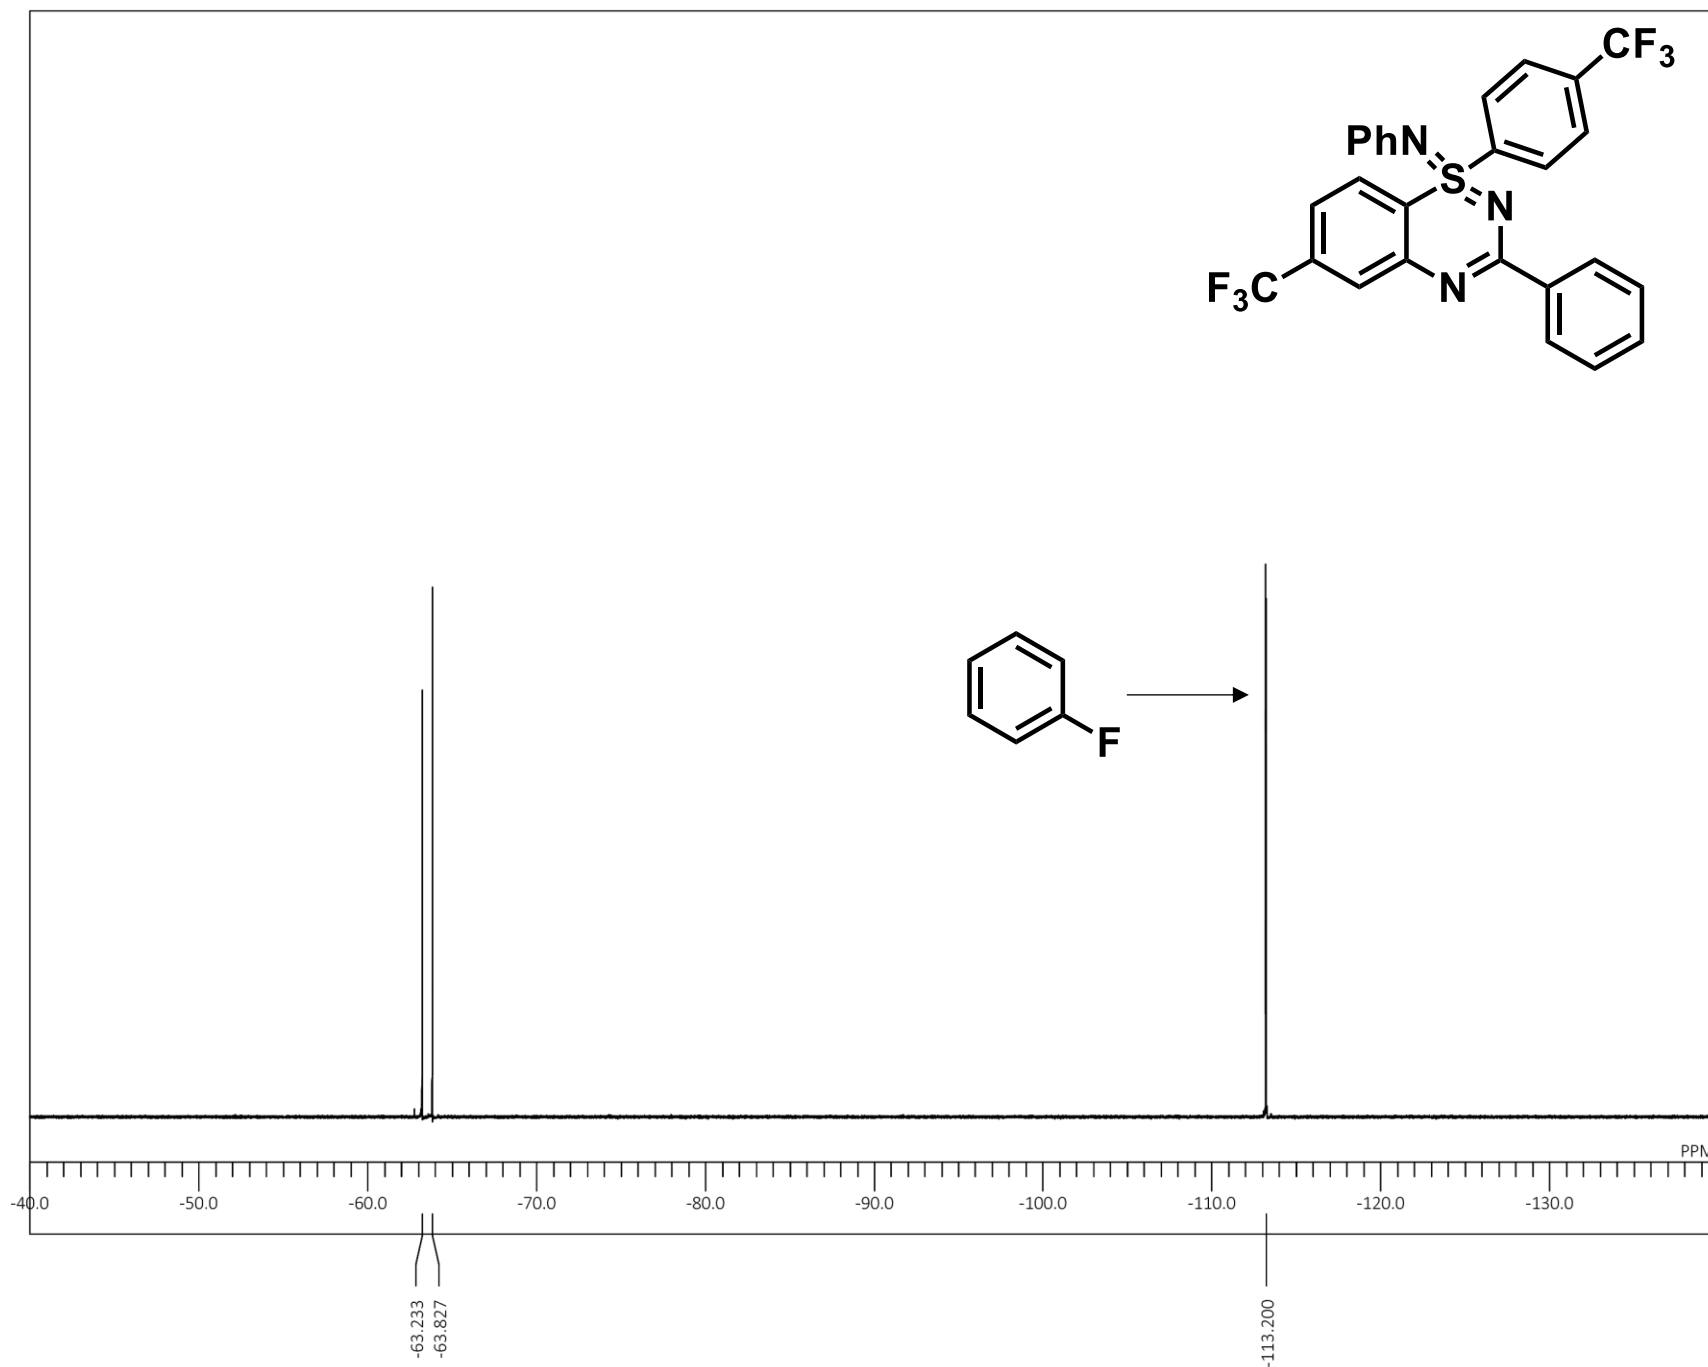

DFILE AM\_sul\_pCF3\_19F-1.als  
COMNT AM\_sul\_pCF3\_19F  
DATIM 2025-01-23 09:33:32  
OBNUC 19F  
EXMOD single\_pulse.ex2  
OBFRQ 564.67 MHz  
OBSET 5.29 KHz  
OBFIN 1.21 Hz  
POINT 26214  
FREQU 56817.31 Hz  
SCANS 8  
ACQTM 0.4614 sec  
PD 10.0000 sec  
PW1 6.65 usec  
IRNUC 19F  
CTEMP 18.8 c  
SLVNT CDCL3  
EXREF -113.20 ppm  
BF 0.02 Hz  
RGAIN 52

# <sup>1</sup>H NMR (600.17 MHz, CDCl<sub>3</sub>) spectrum of 3eb

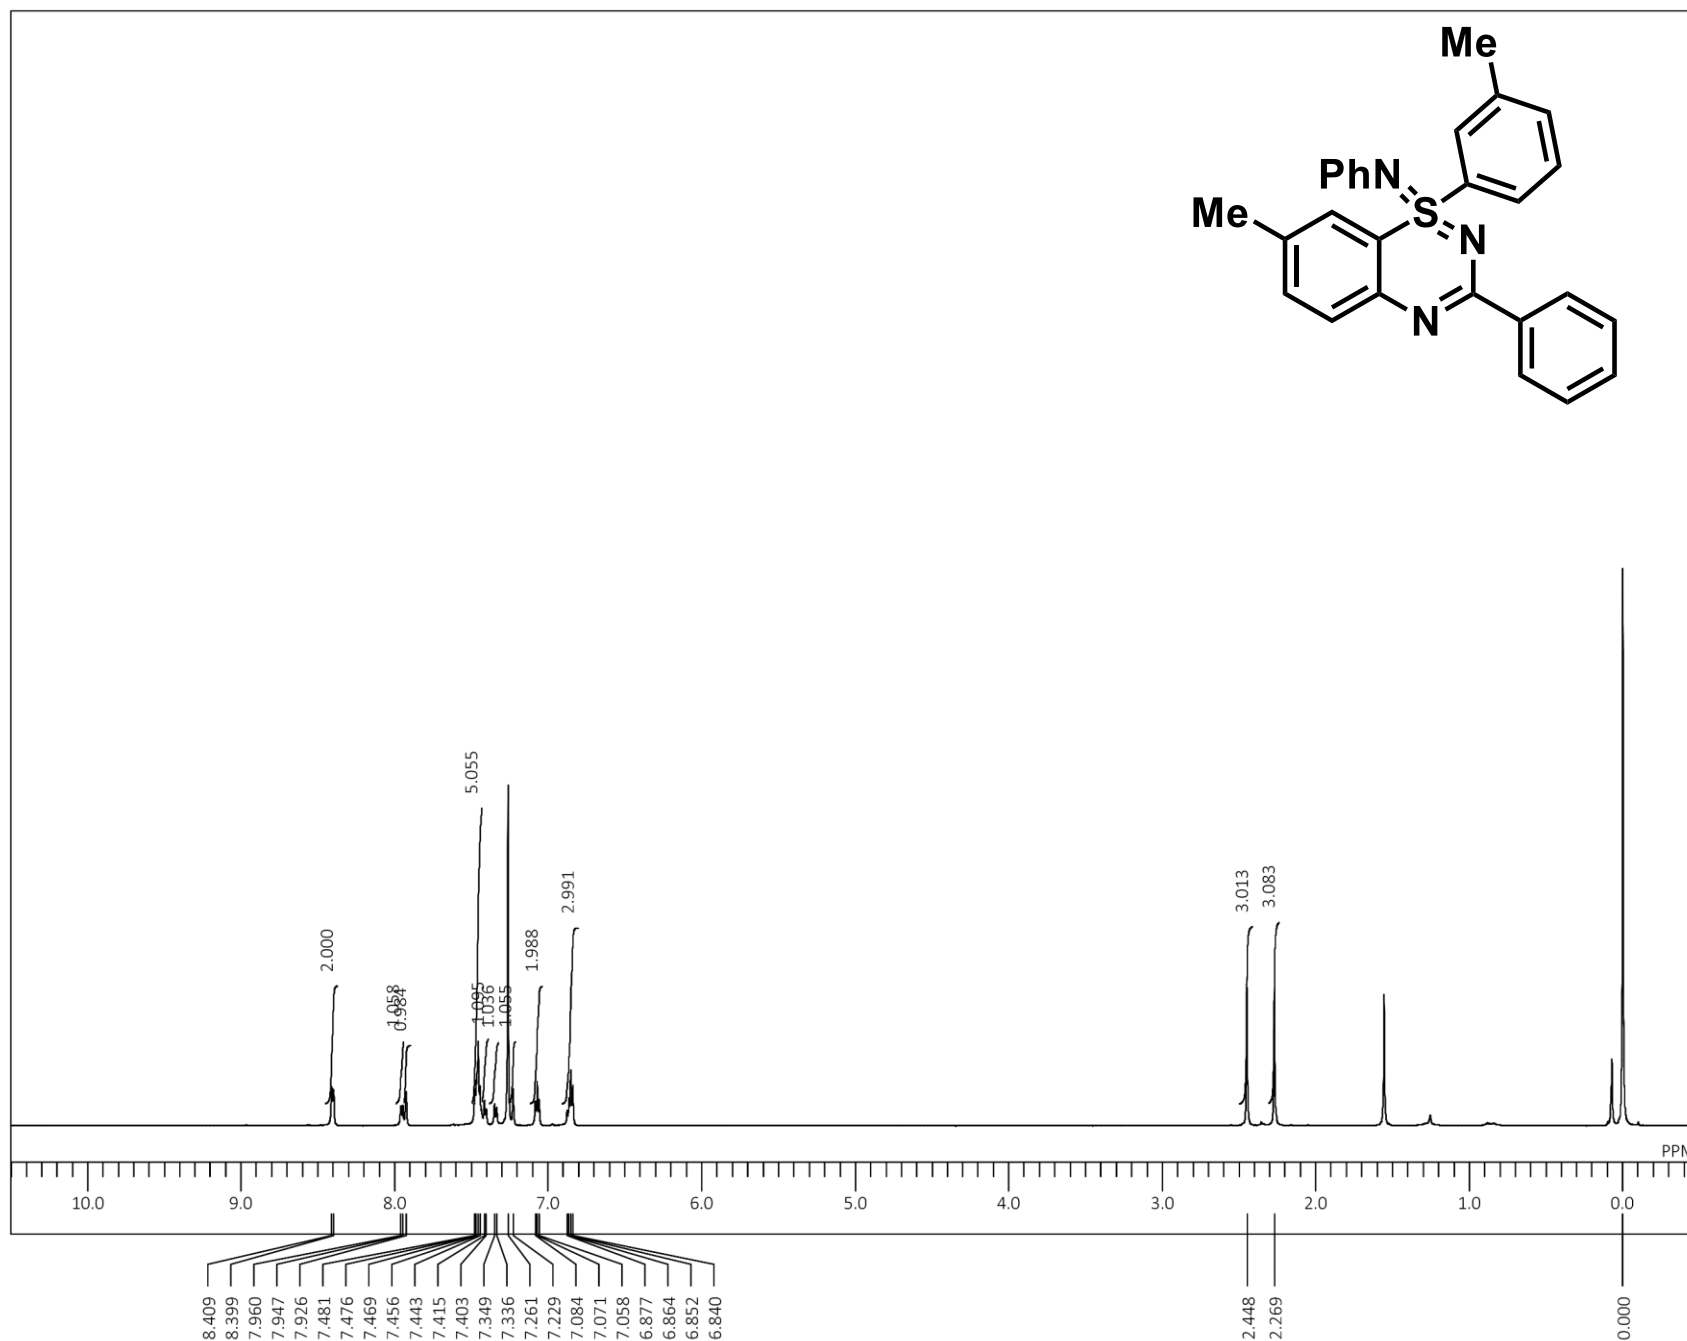

|       |                     |
|-------|---------------------|
| DFILE | AM_sul_mMe_1H-2.als |
| COMNT | AM_sul_mMe_1H       |
| DATIM | 2025-01-22 00:08:55 |
| OBNUC | 1H                  |
| EXMOD | single_pulse.ex2    |
| OBFRQ | 600.17 MHz          |
| OBSET | 5.30 KHz            |
| OBFIN | 5.47 Hz             |
| POINT | 26214               |
| FREQU | 9008.87 Hz          |
| SCANS | 8                   |
| ACQTM | 2.9098 sec          |
| PD    | 10.0000 sec         |
| PW1   | 7.00 usec           |
| IRNUC | 1H                  |
| CTEMP | 19.6 c              |
| SLVNT | CDCL3               |
| EXREF | 0.00 ppm            |
| BF    | 2.00 Hz             |
| RGAIN | 52                  |



# $^{13}\text{C}\{^1\text{H}\}$ NMR (150.92 MHz, $\text{CDCl}_3$ ) spectrum of 3eb

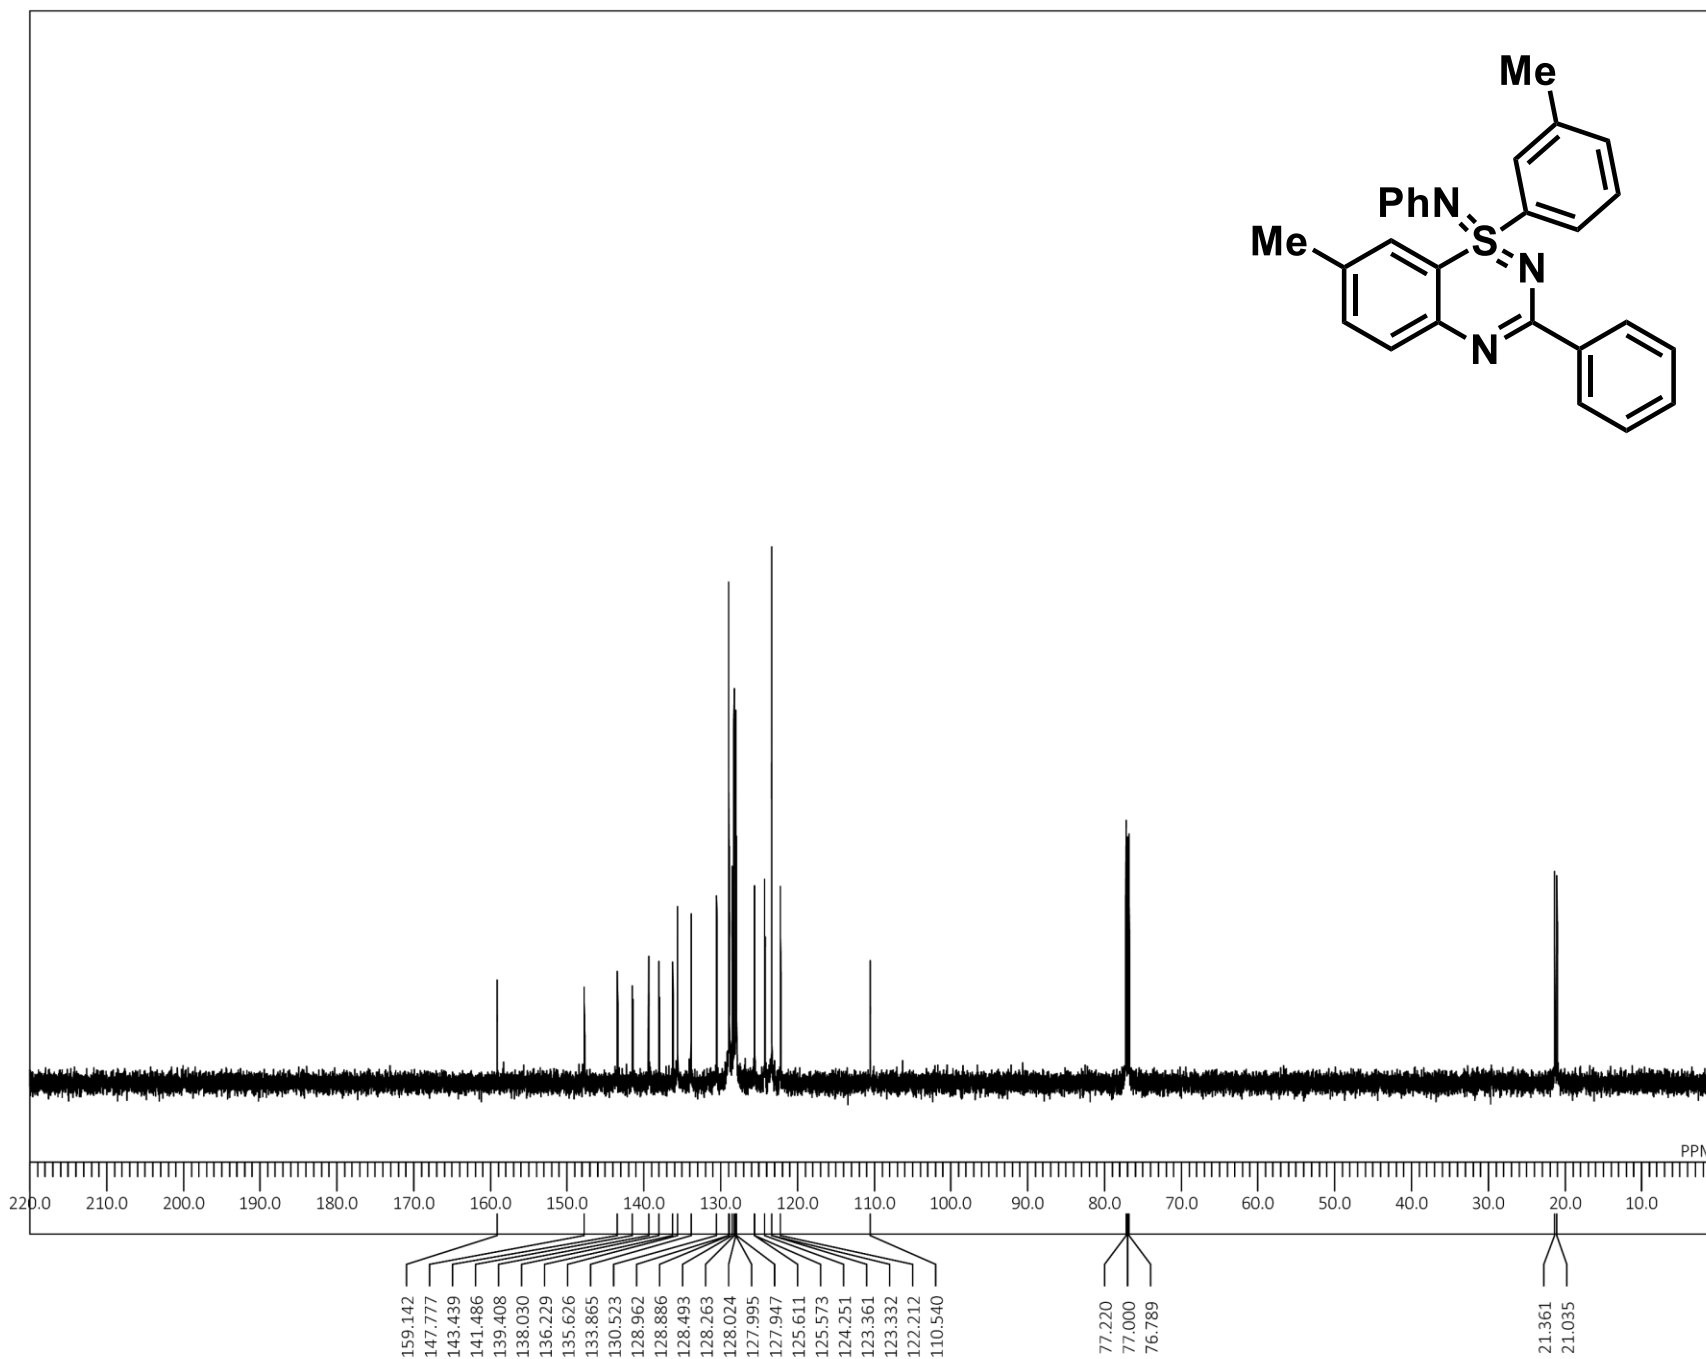

DFILE AM03009\_sul\_mMe\_13C-1.als  
COMNT AM03009\_sul\_mMe\_13C  
DATIM 2024-12-18 23:47:39  
OBNUC 13C  
EXMOD single\_pulse\_dec  
OBFRQ 150.92 MHz  
OBSET 8.52 KHz  
OBFIN 1.74 Hz  
POINT 26214  
FREQU 37878.21 Hz  
SCANS 142  
ACQTM 0.6921 sec  
PD 2.0000 sec  
PW1 3.83 usec  
IRNUC 1H  
CTEMP 17.5 c  
SLVNT CDCL3  
EXREF 77.00 ppm  
BF 0.20 Hz  
RGAIN 60

# <sup>1</sup>H NMR (600.17 MHz, CDCl<sub>3</sub>) spectrum of 3fb

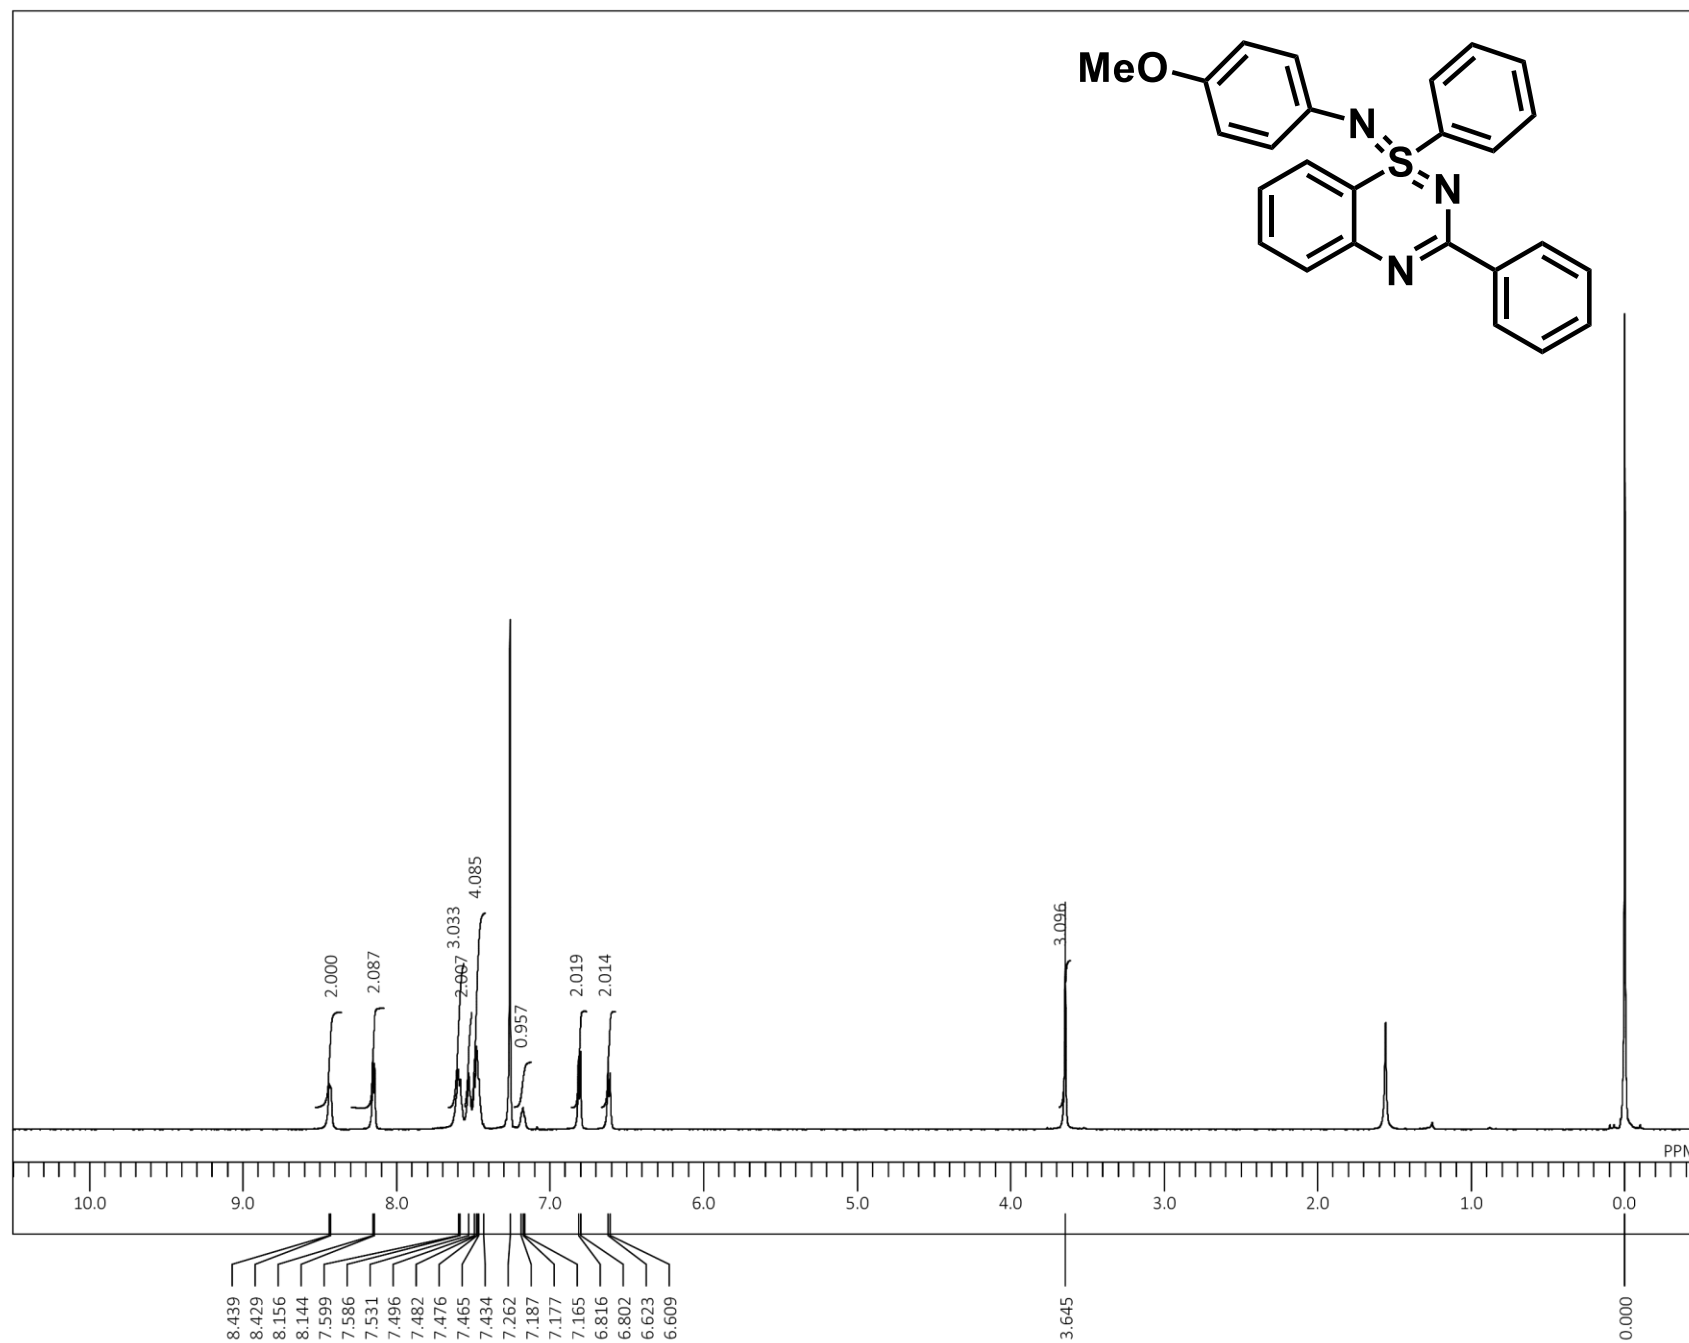

DFILE AM\_sul\_NPh\_pOMe\_1H-2.als  
 COMNT AM\_sul\_NPh\_pOMe\_1H  
 DATIM 2025-01-22 00:16:49  
 OBNUC 1H  
 EXMOD single\_pulse.ex2  
 OBFREQ 600.17 MHz  
 OBSET 5.30 KHz  
 OBFIN 5.47 Hz  
 POINT 26214  
 FREQU 9008.87 Hz  
 SCANS 8  
 ACQTM 2.9098 sec  
 PD 10.0000 sec  
 PW1 7.00 usec  
 IRNUC 1H  
 CTEMP 19.6 c  
 SLVNT CDCL3  
 EXREF 0.00 ppm  
 BF 2.00 Hz  
 RGAIN 52

# $^{13}\text{C}\{^1\text{H}\}$ NMR (150.92 MHz, $\text{CDCl}_3$ ) spectrum of 3fb

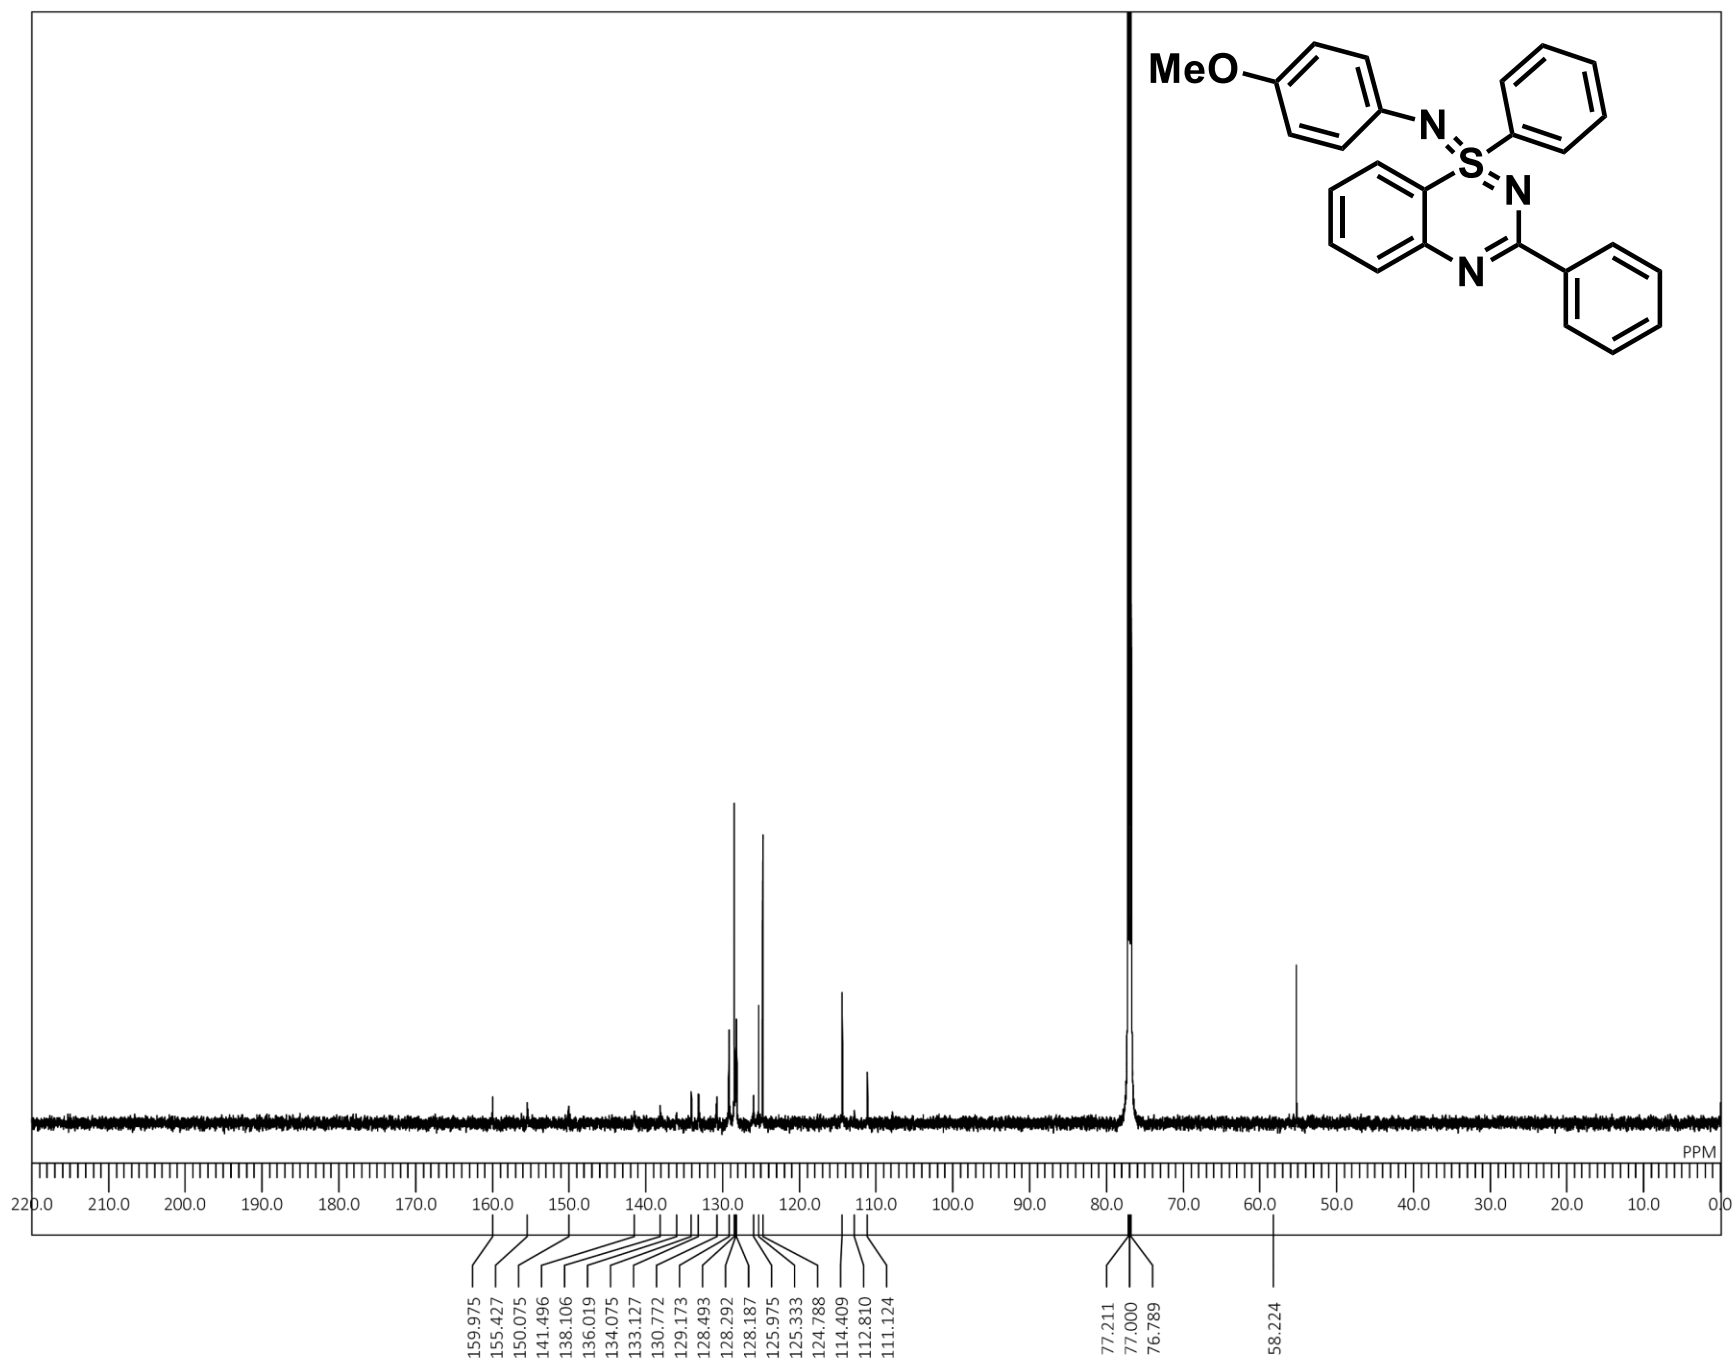

DFILE AM03021\_sul\_NPh\_pOMe\_13C-1  
COMNT AM03021\_sul\_NPh\_pOMe\_13C  
DATIM 2024-12-29 06:32:38  
OBNUC 13C  
EXMOD single\_pulse\_dec  
OBFRQ 150.92 MHz  
OBSET 8.52 KHz  
OBFIN 1.74 Hz  
POINT 26214  
FREQU 37878.21 Hz  
SCANS 10000  
ACQTM 0.6921 sec  
PD 2.0000 sec  
PW1 3.83 usec  
IRNUC 1H  
CTEMP 18.4 c  
SLVNT CDCL3  
EXREF 77.00 ppm  
BF 1.02 Hz  
RGAIN 60

# $^1\text{H}$ NMR (600.17 MHz, $\text{CDCl}_3$ ) spectrum of 3gb

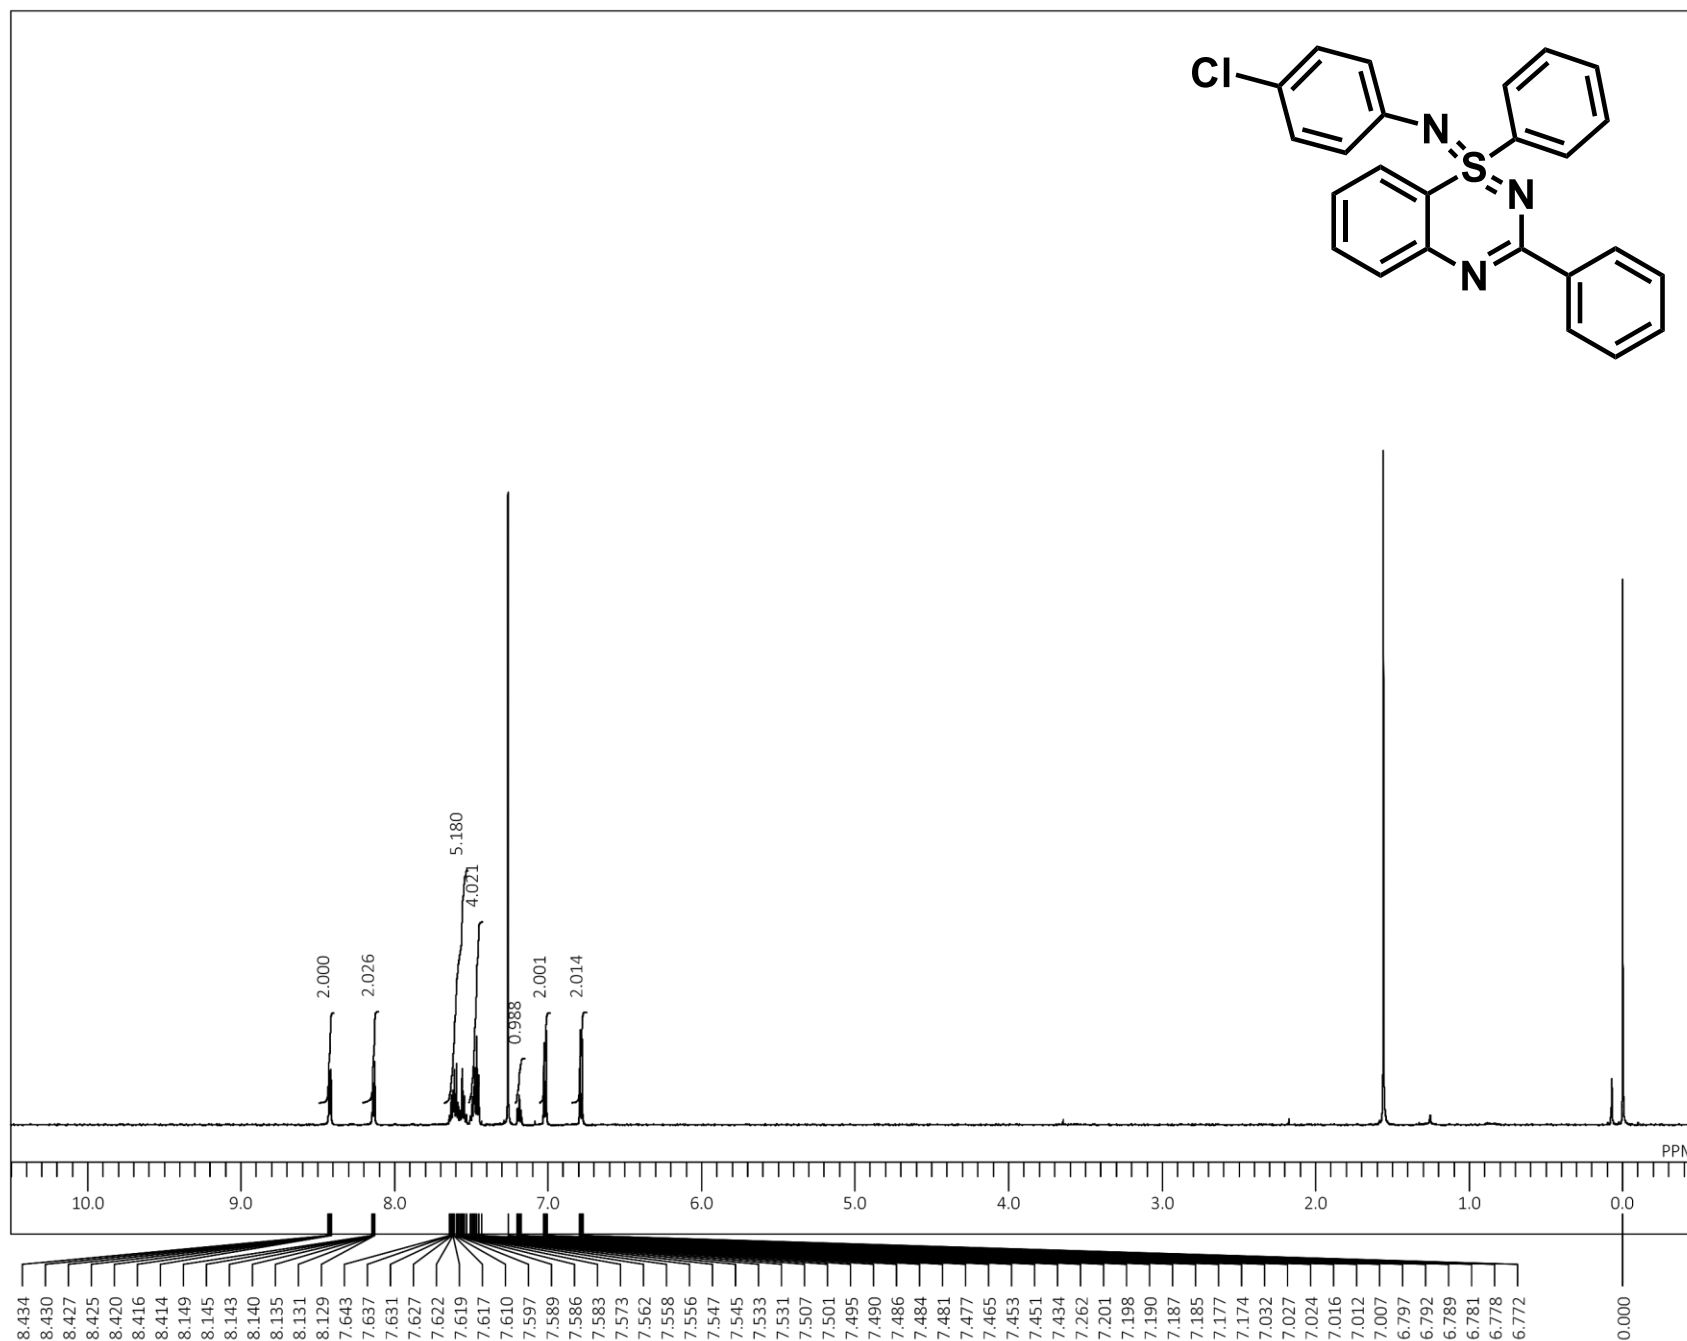

DFILE TE02063\_sul\_NPh\_pCl\_1H.als  
COMNT TE02063\_sul\_NPh\_pCl\_1H  
DATIM 2025-01-22 15:24:55  
OBNUC 1H  
EXMOD single\_pulse.ex2  
OBFRQ 600.17 MHz  
OBSET 5.30 KHz  
OBFIN 5.47 Hz  
POINT 262144  
FREQU 11261.26 Hz  
SCANS 8  
ACQTM 2.9098 sec  
PD 5.0000 sec  
PW1 7.00 usec  
IRNUC 1H  
CTEMP 20.2 c  
SLVNT CDCL3  
EXREF 0.00 ppm  
BF 0.50 Hz  
RGAIN 52

# $^{13}\text{C}\{^1\text{H}\}$ NMR (150.92 MHz, $\text{CDCl}_3$ ) spectrum of 3gb

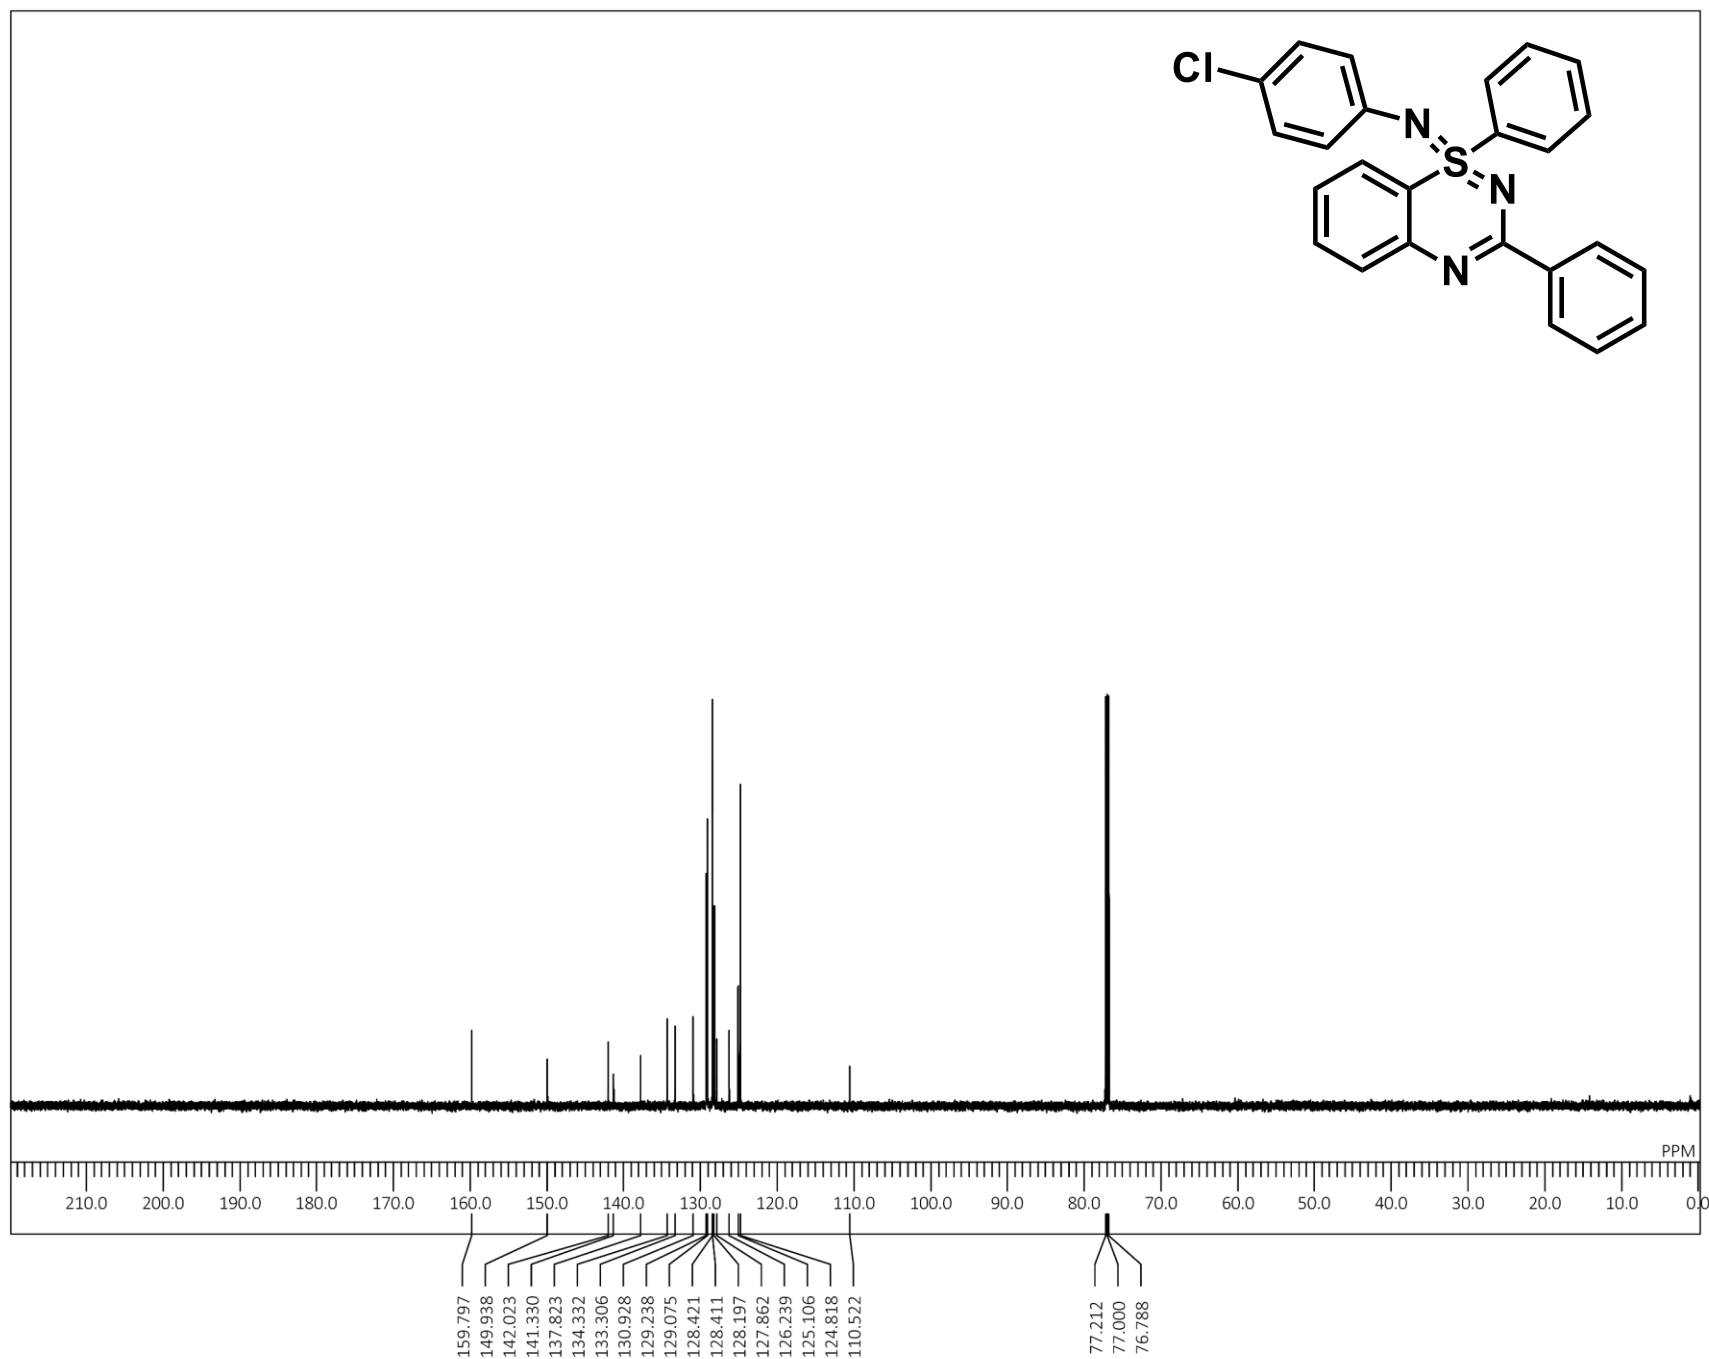

DFILE TE02063\_sul\_NPh\_pCl\_13C.als  
COMNT TE02063\_sul\_NPh\_pCl\_13C  
DATIM 2025-01-15 19:52:57  
OBNUC 13C  
EXMOD single\_pulse\_dec  
OBFRQ 150.92 MHz  
OBSET 8.52 KHz  
OBFIN 1.74 Hz  
POINT 419424  
FREQU 37878.21 Hz  
SCANS 200  
ACQTM 0.6921 sec  
PD 2.0000 sec  
PW1 3.83 usec  
IRNUC 1H  
CTEMP 20.5 c  
SLVNT CDCL3  
EXREF 77.00 ppm  
BF 0.52 Hz  
RGAIN 60

# <sup>1</sup>H NMR (600.17 MHz, CDCl<sub>3</sub>) spectrum of 3hb

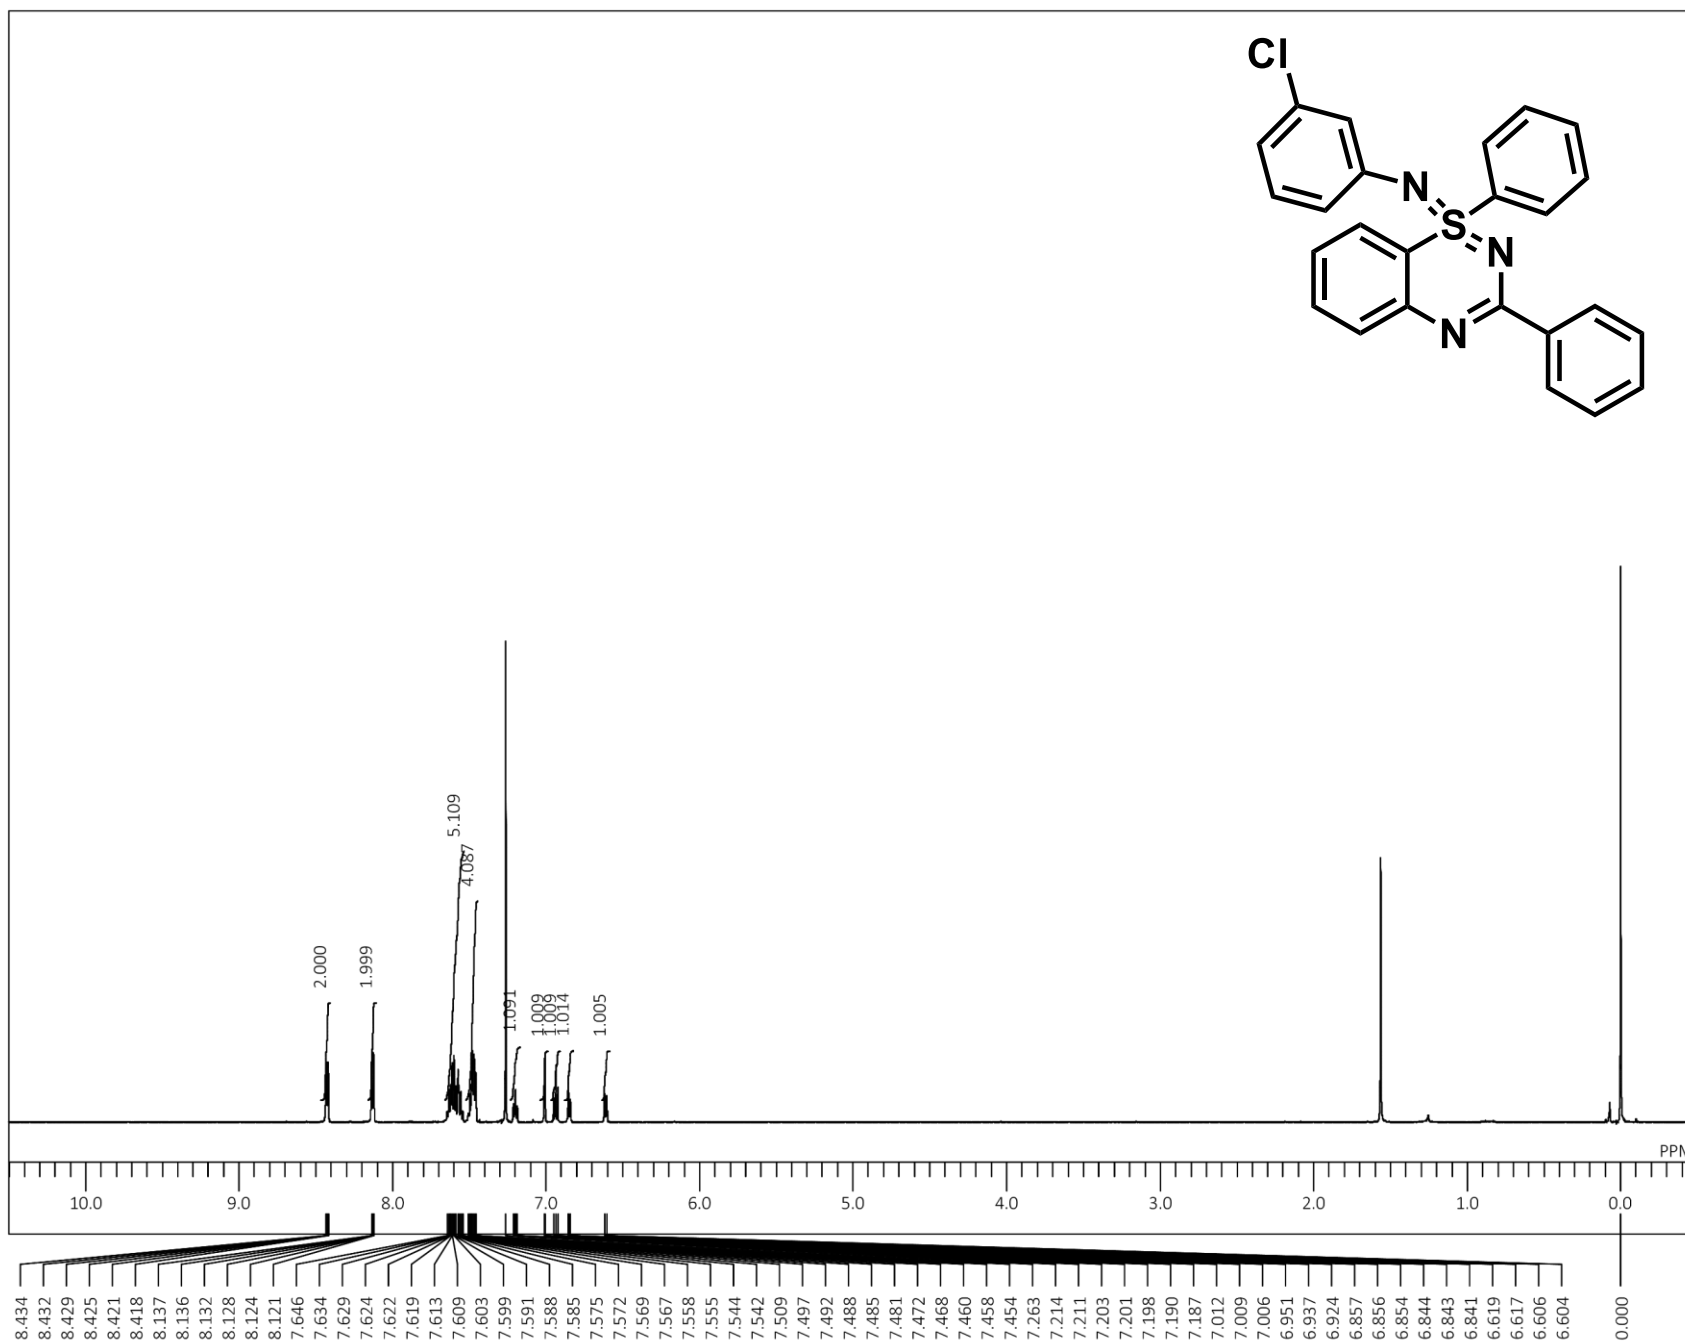

DFILE TE02063\_sul\_NPh\_mCl\_1H.als  
COMNT TE02063\_sul\_NPh\_mCl\_1H  
DATIM 2025-01-17 21:50:14  
OBNUC 1H  
EXMOD single\_pulse.ex2  
OBFRQ 600.17 MHz  
OBSET 5.30 KHz  
OBFIN 5.47 Hz  
POINT 209712  
FREQU 9008.87 Hz  
SCANS 8  
ACQTM 2.9098 sec  
PD 5.0000 sec  
PW1 7.00 usec  
IRNUC 1H  
CTEMP 17.6 c  
SLVNT CDCL3  
EXREF 0.00 ppm  
BF 0.50 Hz  
RGAIN 54

# $^{13}\text{C}\{^1\text{H}\}$ NMR (150.92 MHz, $\text{CDCl}_3$ ) spectrum of 3hb

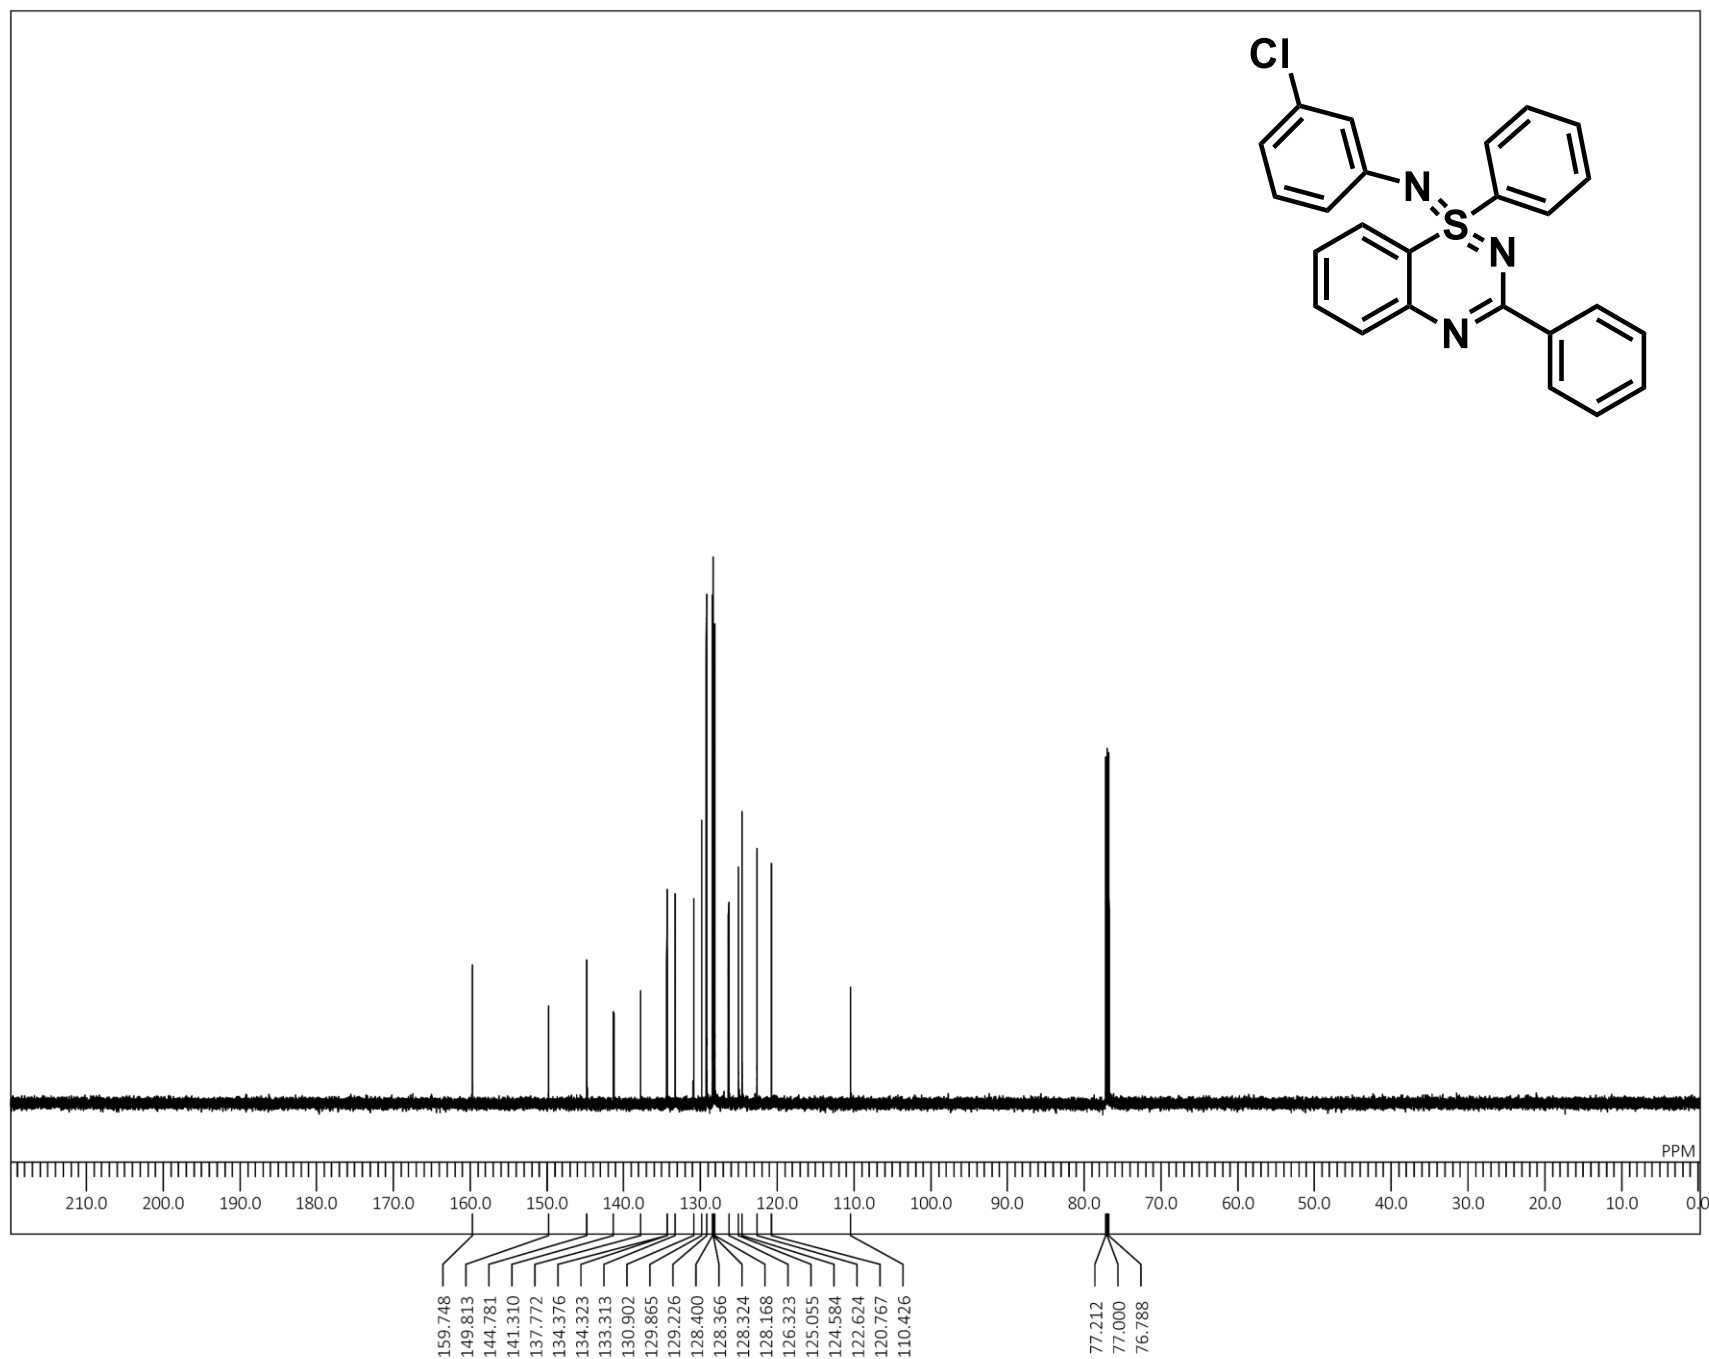

DFILE TE02063\_sul\_NPh\_mCl\_13C.als  
COMNT TE02063\_sul\_NPh\_mCl\_13C  
DATIM 2025-01-15 19:39:53  
OBNUC 13C  
EXMOD single\_pulse\_dec  
OBFRQ 150.92 MHz  
OBSET 8.52 KHz  
OBFIN 1.74 Hz  
POINT 209712  
FREQU 37878.21 Hz  
SCANS 100  
ACQTM 0.6921 sec  
PD 2.0000 sec  
PW1 3.83 usec  
IRNUC 1H  
CTEMP 19.1 c  
SLVNT CDCL3  
EXREF 77.00 ppm  
BF 0.12 Hz  
RGAIN 60

# <sup>1</sup>H NMR (600.17 MHz, CDCl<sub>3</sub>) spectrum of 3ib

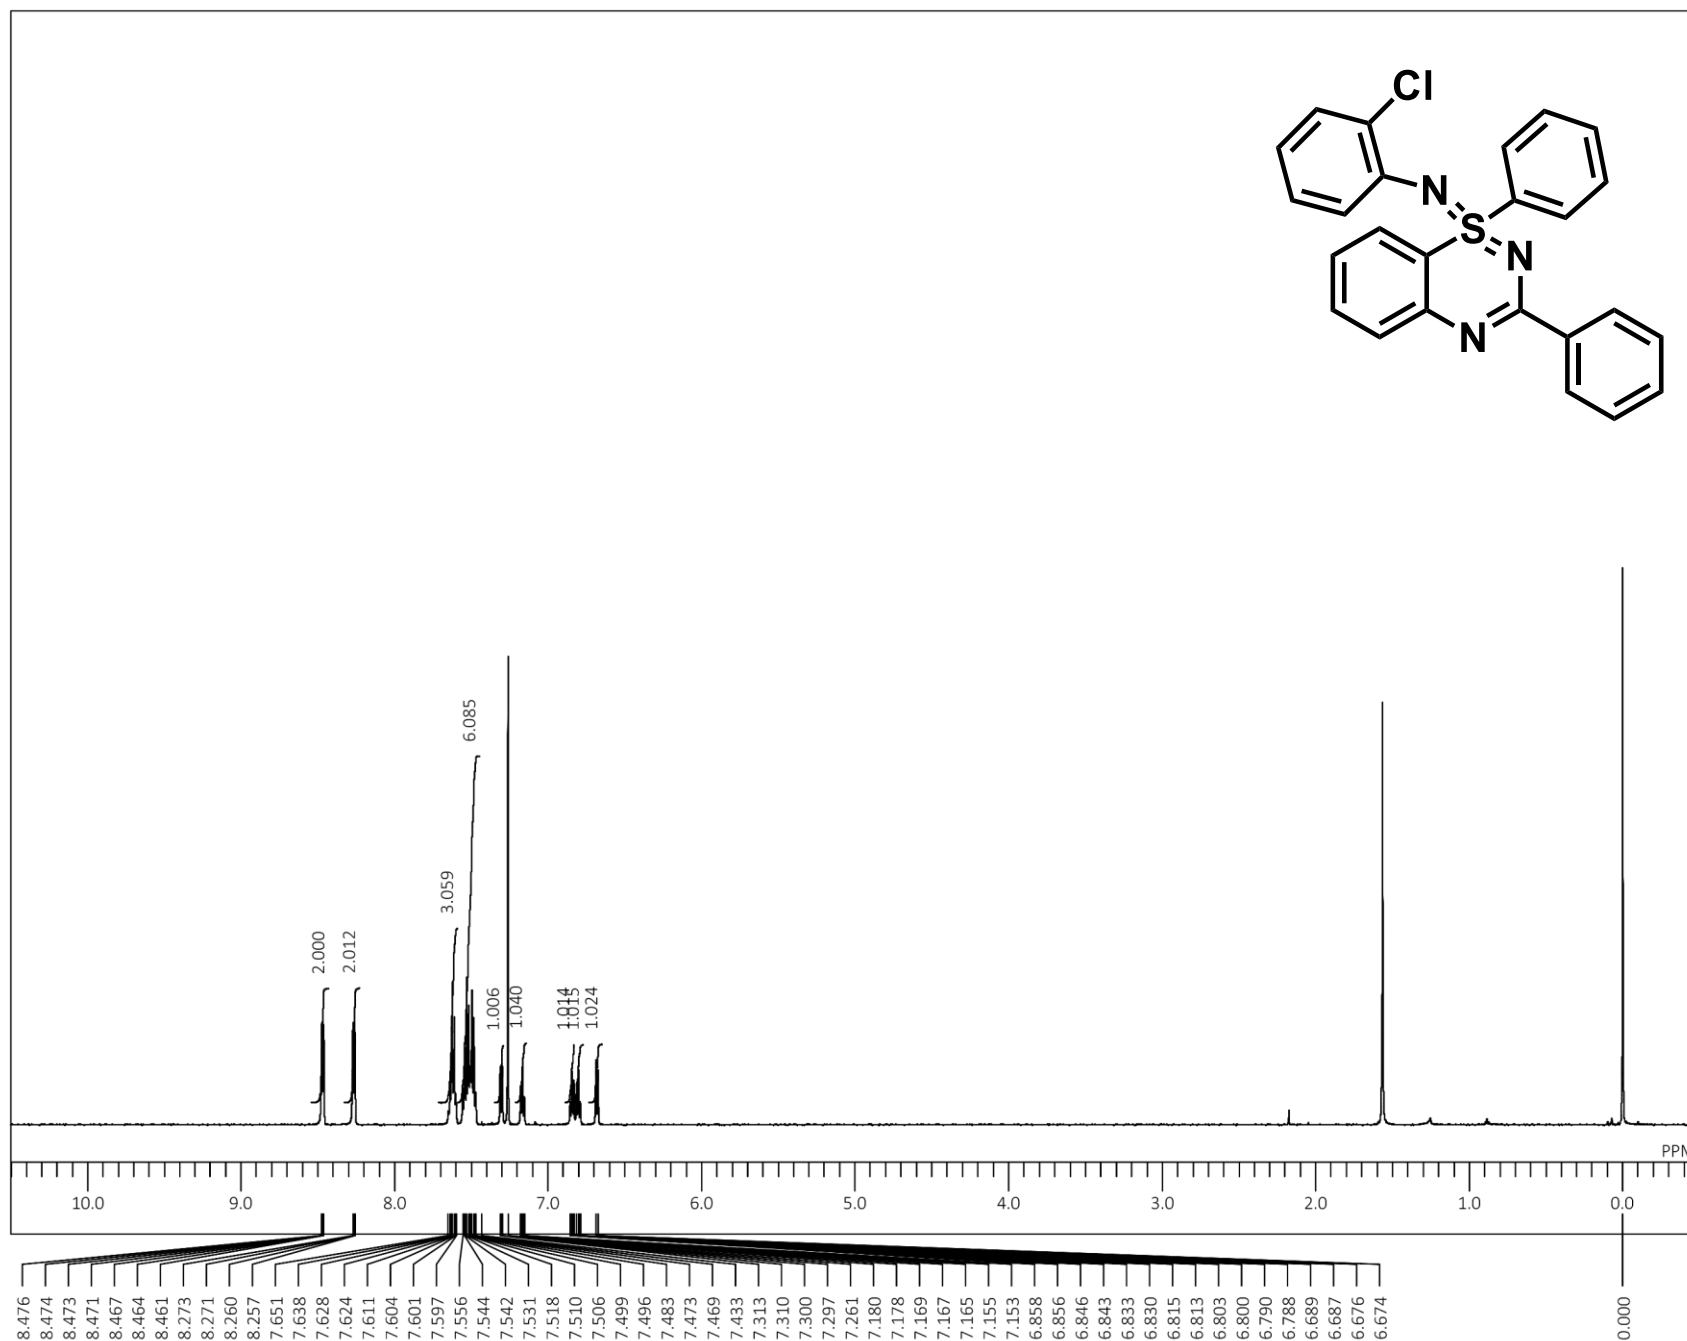

DFILE TE02063\_sul\_NPh\_oCl\_1H.als  
COMNT TE02063\_sul\_NPh\_oCl\_1H  
DATIM 2025-01-20 21:15:02  
OBNUC 1H  
EXMOD single\_pulse.ex2  
OBFRQ 600.17 MHz  
OBSET 5.30 KHz  
OBFIN 5.47 Hz  
POINT 209712  
FREQU 9008.87 Hz  
SCANS 8  
ACQTM 2.9098 sec  
PD 5.0000 sec  
PW1 7.00 usec  
IRNUC 1H  
CTEMP 19.8 c  
SLVNT CDCL3  
EXREF 0.00 ppm  
BF 0.60 Hz  
RGAIN 52



# $^{13}\text{C}\{^1\text{H}\}$ NMR (150.92 MHz, $\text{CDCl}_3$ ) spectrum of 3ib

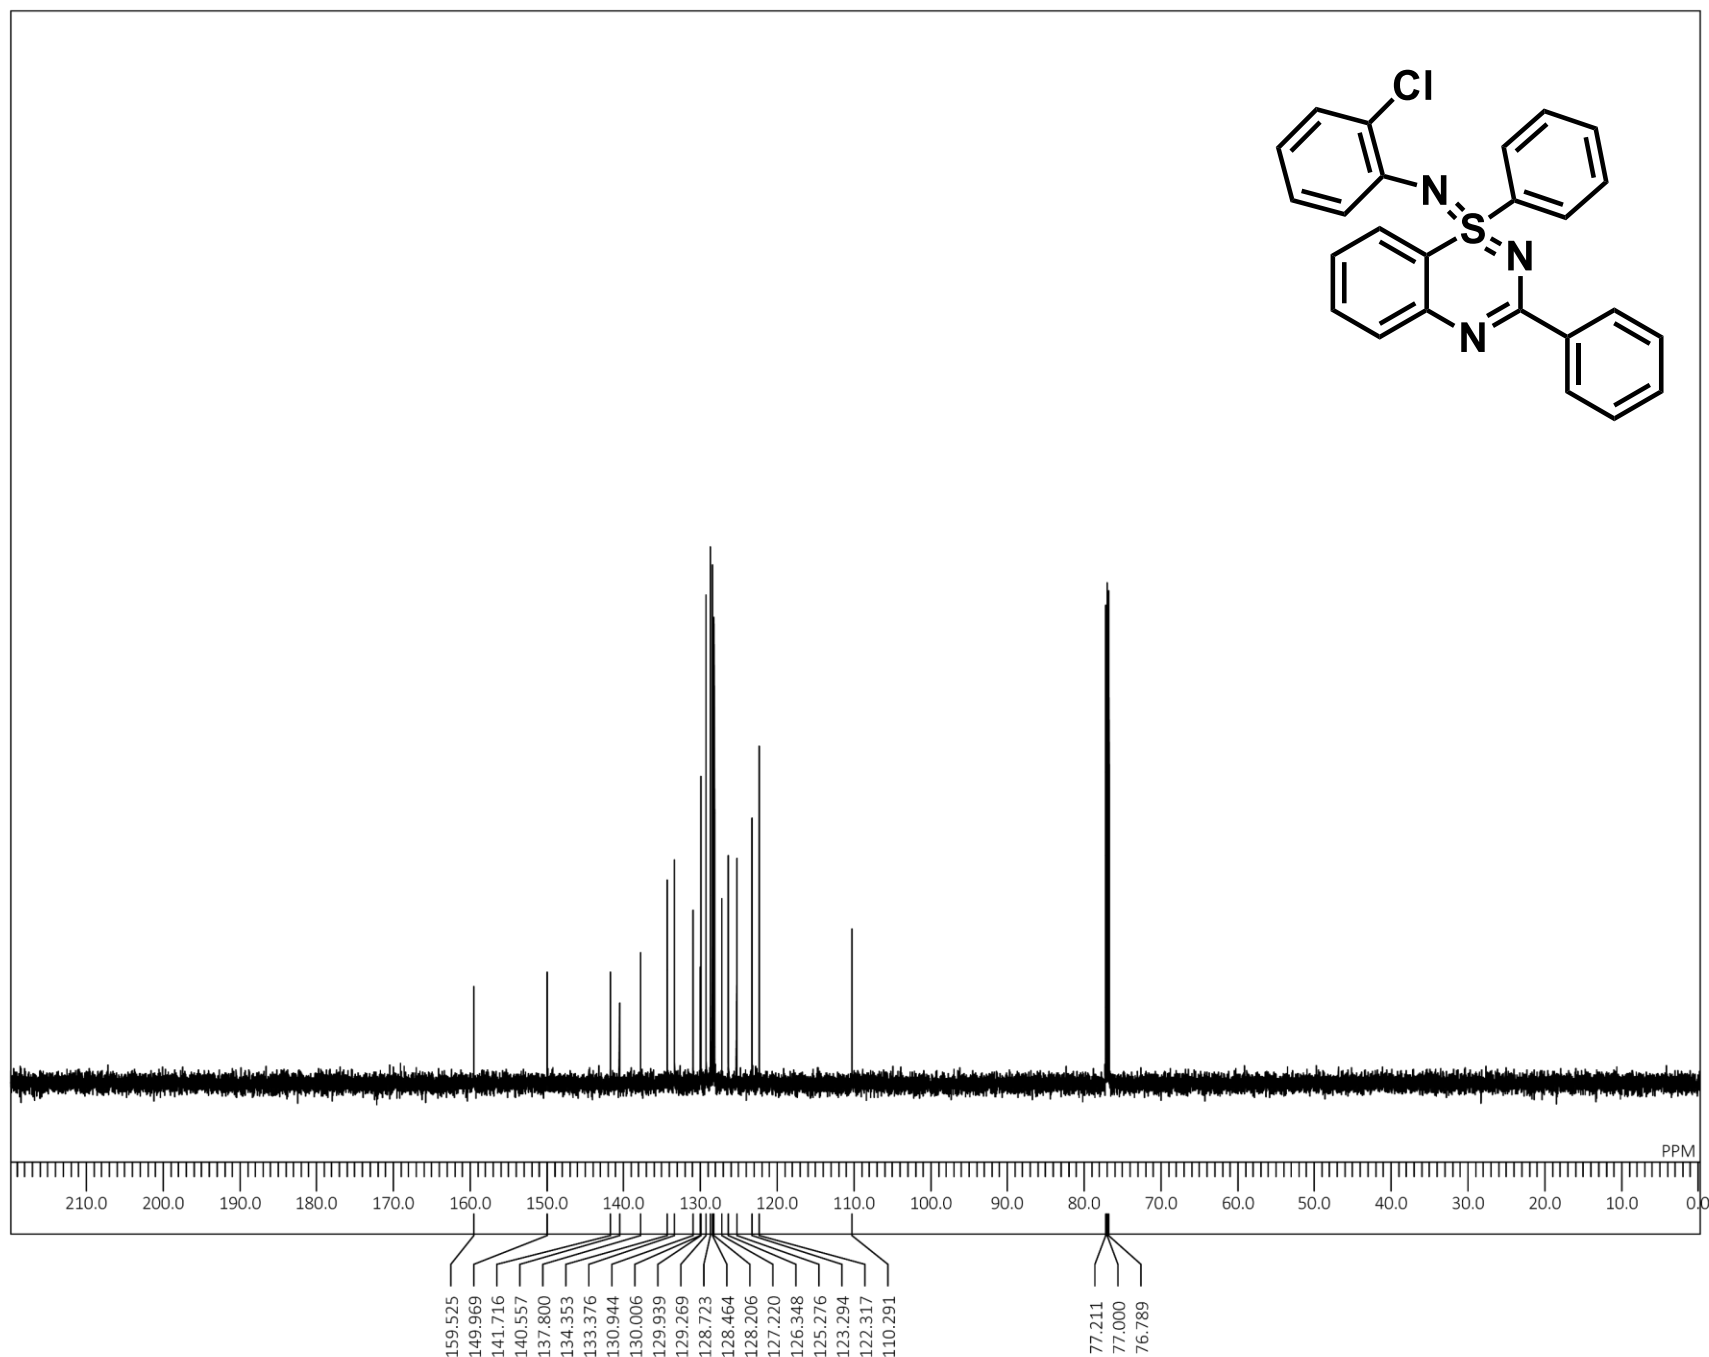

DFILE TE02063\_sul\_NPh\_oCl\_13C.als  
COMNT TE02063\_sul\_NPh\_oCl\_13C  
DATIM 2025-01-15 19:30:01  
OBNUC 13C  
EXMOD single\_pulse\_dec  
OBFRQ 150.92 MHz  
OBSET 8.52 KHz  
OBFIN 1.74 Hz  
POINT 26214  
FREQU 37878.21 Hz  
SCANS 64  
ACQTM 0.6921 sec  
PD 2.0000 sec  
PW1 3.83 usec  
IRNUC 1H  
CTEMP 18.9 c  
SLVNT CDCL3  
EXREF 77.00 ppm  
BF 0.12 Hz  
RGAIN 60
